# Supplementary material for: The Gut Microbiota Contributes to Systemic Responses and Liver Injury in Gut-Derived Sepsis
Source: Microorganisms. 2023 Jul 3;11(7):1741. doi: 10.3390/microorganisms11071741 (PMC10383566; doi:10.3390/microorganisms11071741)
Supplement: Supplementary file 1 [file microorganisms-11-01741-s001.zip › SUPPLEMENTAL FILE 2.xlsx]

## Sheet: Table S2
Phylum	Class	Order	Family	Genus	Species	Water1	Water2	Water3	Water4	Azithromycin1	Azithromycin2	Azithromycin3	Azithromycin4	Amoxicillin1	Amoxicillin2	Amoxicillin3	Amoxicillin4	Metronidazole1	Metronidazole2	Metronidazole3	Metronidazole4	Levofloxacin1	Levofloxacin2	Levofloxacin3	Levofloxacin4
Actinobacteriota	Actinobacteria	Bifidobacteriales	Bifidobacteriaceae	Bifidobacterium	unclassified_Bifidobacterium	0	0	0	0	0	0.00464148	0.00762126	0	0.00352929	0.00763585	0	0	1.63e-05	0	0	6.43e-05	0	0	0	0
Actinobacteriota	Coriobacteriia	Coriobacteriales	Atopobiaceae	Coriobacteriaceae_UCG_002	unclassified_Coriobacteriaceae_UCG_002	0	0	0	0	0.0012899	0.000921937	0.000595901	0	0	0	0	0	0	0	0	0	0.00251936	0.00153812	0.00101929	0.000780005
Actinobacteriota	Coriobacteriia	Coriobacteriales	Atopobiaceae	unclassified_Atopobiaceae	unclassified_Atopobiaceae	0	0	0	0	0.00209824	0.00119216	0.00148975	0.000497375	0.000302511	0.000968145	0.000344155	0.00126855	0	0	0	0	0	0	0	0
Actinobacteriota	Coriobacteriia	Coriobacteriales	Eggerthellaceae	Enterorhabdus	unclassified_Enterorhabdus	0.000245419	0	0.000186738	0.00034237	0	0.000524551	0.000235224	0.000865801	0	0	0.00029499	0.000280071	0	0	0	0.00024101	0.00233337	0.00252692	0.00101929	0.00308683
Actinobacteriota	Coriobacteriia	Coriobacteriales	Eggerthellaceae	unclassified_Eggerthellaceae	unclassified_Eggerthellaceae	0.000376309	0	0.00112043	0.00502661	0	0	0	0.000184213	0	0	0	0	0	0	0	0.000819435	0.00101451	0.000970483	0.000822589	0.000614047
Actinobacteriota	Coriobacteriia	Coriobacteriales	Eggerthellaceae	unclassified_Eggerthellaceae	uncultured_Coriobacteriales_bacterium	0	0	0	0	0	0	0.000235224	0	0	0.000265459	0	0	0	0	0	0	0.000304352	0.000274665	0	0.000265534
Bacteroidota	Bacteroidia	Bacteroidales	Bacteroidaceae	Bacteroides	Bacteroides_caecimuris	0	0	0	0	0	0.193861	0.120639	0	0.0967194	0.00484072	0	0	0	0	0	0	0	0.0023255	0	0.00187533
Bacteroidota	Bacteroidia	Bacteroidales	Bacteroidaceae	Bacteroides	Bacteroides_stercorirosoris	0.00701898	0.000276907	0.0159817	0.0167606	0.00686227	0	0.000376358	0.00792116	0	0	0.0127501	0.00889636	0	0	0	0.0382403	0	0	0	0
Bacteroidota	Bacteroidia	Bacteroidales	Bacteroidaceae	Bacteroides	Phocaeicola_sartorii	0.00026178	7.29e-05	0.000264546	0.000280121	0.0925117	0.000206641	0.000282269	0.0931749	0.000201674	0.000234229	0.103804	0.0515	8.17e-05	0.000166453	0.000212993	0.000144606	0.00282371	0.00113528	0.00112659	0.000862985
Bacteroidota	Bacteroidia	Bacteroidales	Bacteroidaceae	Bacteroides	unclassified_Bacteroides	0.0432755	0.00100561	0.106192	0.0827912	0.465379	0.0135429	0.0108673	0.290504	0.00117643	0.000749532	0.34581	0.338441	0.0283571	0.0273316	0.0205538	0.0871333	0.00583342	0.00329598	0.00336189	0.00333577
Bacteroidota	Bacteroidia	Bacteroidales	Marinifilaceae	Butyricimonas	Butyricimonas_virosa	0.000425393	0	0.000700269	0.000591366	0.000584755	0	0	0.000718431	0	0	0	0.00110381	0	0	0	0.000996176	0.000202901	0	0	0
Bacteroidota	Bacteroidia	Bacteroidales	Marinifilaceae	Butyricimonas	unclassified_Butyricimonas	0	0	0.000264546	0.000155623	0.00139309	0	0	0.000294741	0	0	0	0.000329495	0	0	0	0.000257078	0	0	0	0
Bacteroidota	Bacteroidia	Bacteroidales	Marinifilaceae	Odoribacter	unclassified_Odoribacter	0	0	0	0	0	0	0	0	0	0	0	1.65e-05	0	0	0	0	0.00108214	0.00155643	0.00171671	0.00106214
Bacteroidota	Bacteroidia	Bacteroidales	Muribaculaceae	Muribaculum	unclassified_Muribaculum	0.00605366	0	0.00911906	0.0176787	0.00952807	0	0.000172498	0.0125633	0	0	0.019961	0.0189295	6.54e-05	0	0	0.0134484	0.0170437	0.0162052	0.0128217	0.0128286
Bacteroidota	Bacteroidia	Bacteroidales	Muribaculaceae	unclassified_Muribaculaceae	unclassified_Muribaculaceae	0.242507	0.444844	0.359954	0.404852	0.0883324	0.195816	0.218068	0.13442	0.237236	0.292005	0.0662417	0.114681	0.571555	0.659753	0.393747	0.313265	0.272936	0.229638	0.225729	0.215447
Bacteroidota	Bacteroidia	Bacteroidales	Muribaculaceae	uncultured_Bacteroidales_bacterium	uncultured_Bacteroidales_bacterium	6.54e-05	0.000291481	0	0.00014006	0.00211544	0.00252738	0.00139566	0.0182739	0.001647	0.00224859	0.00283518	0.00830327	0.0019613	0.00266325	0.00170394	0.000160674	0.188935	0.183458	0.160298	0.183733
Bacteroidota	Bacteroidia	Bacteroidales	Muribaculaceae	uncultured_Muribaculaceae_bacterium	uncultured_Muribaculaceae_bacterium	0	0	0	0	0	0	0	0.000313162	0	0	0	6.59e-05	0	0	0	0	0.00246863	0.00247198	0.00404142	0.0028213
Bacteroidota	Bacteroidia	Bacteroidales	Prevotellaceae	Alloprevotella	uncultured_Bacteroidales_bacterium	0	0.000116593	0	0	0.0204664	0.00408514	0.00330882	0.0193424	0	0	0.0200921	0.017908	9.81e-05	0	7.61e-05	0	0.00507254	0.0105471	0.0135548	0.00472982
Bacteroidota	Bacteroidia	Bacteroidales	Prevotellaceae	Prevotellaceae_NK3B31_group	unclassified_Prevotellaceae_NK3B31_group	0	0	0	0	0	0.00128753	0.000846806	0	0	0	0	0	0	0	0	1.61e-05	0.0677353	0.0168278	0.00826165	0.0208112
Bacteroidota	Bacteroidia	Bacteroidales	Prevotellaceae	Prevotellaceae_UCG_001	unclassified_Prevotellaceae_UCG_001	0	0	7.78e-05	0	0	0.0154981	0.0128275	0.015437	0	0	0	0.00731478	0	0	0	0	0.0305536	0.0219549	0.0105685	0.0181891
Bacteroidota	Bacteroidia	Bacteroidales	Rikenellaceae	Alistipes	Alistipes_sp._cv1	0	1.46e-05	0	0	0	0	0	0	0	0	0	0	0	0	0	0	0.000946874	0	0.000500706	0.00111192
Bacteroidota	Bacteroidia	Bacteroidales	Rikenellaceae	Alistipes	unclassified_Alistipes	0.00271597	0	0.00308119	0.00331476	0.00455765	0	7.84e-05	0.00434743	0	0	0	0.000609565	0	0	0	0.00297246	0.0101113	0.0125247	0.0111586	0.00736856
Bacteroidota	Bacteroidia	Bacteroidales	Rikenellaceae	Rikenella	unclassified_Rikenella	0	0	0	0	0	0	0	0	0	0	0	0	0	3.33e-05	0	0	0.00211356	0.00234381	0.00463153	0.00202469
Bacteroidota	Bacteroidia	Bacteroidales	Rikenellaceae	Rikenellaceae_RC9_gut_group	unclassified_Rikenellaceae_RC9_gut_group	0.00562827	5.83e-05	0.0220818	0.0189393	0.000137589	0.0181526	0.0121062	0	0.0235454	0.00134291	0.000442485	0.0018946	0	0	3.04e-05	0.00857997	0.00087924	0.00164799	0.000929883	0.0011949
Bacteroidota	Bacteroidia	Bacteroidales	Tannerellaceae	Parabacteroides	Parabacteroides_goldsteinii	0.00780432	0.000145741	0.0228755	0.019484	0.00208104	0.0277217	0.0222522	0.00230266	0.00996605	0.00346658	0.00019666	0.000873161	0	0	0	0.02529	0.00118359	0.00091555	0.000429177	0.000846389
Bacteroidota	Bacteroidia	Bacteroidales	Tannerellaceae	Parabacteroides	Parabacteroides_johnsonii	0	0	0	0	0.0119703	0.00335394	0.00258746	0.0141844	0	0	0.0237631	0.01631	0	0	0	0	0	9.16e-05	0	0
Bacteroidota	Bacteroidia	Bacteroidales	Tannerellaceae	Parabacteroides	unclassified_Parabacteroides	0.00013089	0	0.000124492	0	0.0181618	0.0309644	0.0259844	0.00867643	0.0284024	0.00851031	0.00254019	0.00481062	0.000114409	0	0	0	0.00087924	0.00179448	0.000304	0.00169278
Campylobacterota	Campylobacteria	Campylobacterales	Helicobacteraceae	Helicobacter	unclassified_Helicobacter	0.00831152	0	0.00915018	0.0113449	0.00290658	0	0	0.00552639	0	0	0.000917747	0.00126855	0	0	0	0.00390437	0.0118021	0.00221563	0.0228537	0.00386683
Cyanobacteria	Cyanobacteriia	Cyanobacteriales	unclassified_Cyanobacteriales	unclassified_Cyanobacteriales	unclassified_Cyanobacteriales	0	0.000816148	0	0	0	0.000190746	0.000172498	0	0.000470572	0	0.000180272	0.000214172	0.000261506	0.000832265	0	0.0007873	0	0	0.000143059	0.000265534
Cyanobacteria	Vampirivibrionia	Gastranaerophilales	uncultured_rumen_bacterium	uncultured_rumen_bacterium	uncultured_rumen_bacterium	0	0	0	0	0	0	0	0	0	0	0	0	0	0	0	0	0	0.000805684	0	0.000365109
Deferribacterota	Deferribacteres	Deferribacterales	Deferribacteraceae	Mucispirillum	Mucispirillum_schaedleri	0	0.000160315	0	0	0	0.00227305	0.00103499	0.000221056	0	0	0	0	0.000539357	0.000399487	0.000349916	0	0	0	0	0
Desulfobacterota	Desulfovibrionia	Desulfovibrionales	Desulfovibrionaceae	Bilophila	unclassified_Bilophila	0	0	0	0	0	0	0	0.00291056	0	0	0	0	0	0	0	0	0.000118359	0.000622574	0.000518589	0.00207448
Desulfobacterota	Desulfovibrionia	Desulfovibrionales	Desulfovibrionaceae	Desulfovibrio	unclassified_Desulfovibrio	0	0	0	0	0.000137589	0	0	0.00241319	0	0	0	0.000131798	0	0	0	0	0.00701701	0.0293525	0.0678815	0.0496382
Desulfobacterota	Desulfovibrionia	Desulfovibrionales	Desulfovibrionaceae	unclassified_Desulfovibrionaceae	uncultured_Desulfovibrionaceae_bacterium	0	0	0	0	0.00051596	0	0	0.000221056	0	0	0	0	0	0	0	0	0	0.000164799	0	0.000298725
Firmicutes	Bacilli	Bacillales	Bacillaceae	Bacillus	Limosilactobacillus_vaginalis	0	0.000306056	0	0	0	0	0	0.000110528	0	0	0	0	0	0.00118182	0	0	0	0	0	0
Firmicutes	Bacilli	Erysipelotrichales	Erysipelatoclostridiaceae	Candidatus_Stoquefichus	unclassified_Candidatus_Stoquefichus	0	0	0	0	1.72e-05	0.000429178	0	0	0	0.000499688	0	0	0	0	0	0	0	9.16e-05	0	0
Firmicutes	Bacilli	Erysipelotrichales	Erysipelatoclostridiaceae	Erysipelatoclostridium	unclassified_Erysipelatoclostridium	0.000343586	0	0	0.00126054	0.00865094	0.0147987	0.013988	0.00215529	0.00695775	0.00940038	0.00111441	0.000774313	0	0	1.52e-05	0	0	0.00668351	0.000608001	0.00230682
Firmicutes	Bacilli	Erysipelotrichales	Erysipelotrichaceae	Dubosiella	Dubosiella_newyorkensis	0	0	0	0	0	0.000921937	0	0	0	0	0	0	0	0	0	0	0.000608704	0	0	0.000182554
Firmicutes	Bacilli	Erysipelotrichales	Erysipelotrichaceae	Faecalibaculum	unclassified_Faecalibaculum	0	0	0	0	0	0.00398976	0.00519061	1.84e-05	0.00161339	0.00599625	0	0	0	0	0	0	0.00904602	0.00556654	0.00341553	0.003203
Firmicutes	Bacilli	Erysipelotrichales	Erysipelotrichaceae	unclassified_Erysipelotrichaceae	unclassified_Erysipelotrichaceae	0.000703534	0	0	0.00146285	0	0.00130343	0	0.000368426	0	0	0	0	0	0	0	0.00179954	0.000524162	0.000567641	0.000232471	0.000315321
Firmicutes	Bacilli	Lactobacillales	Enterococcaceae	Enterococcus	unclassified_Enterococcus	0	0	0	0	0.000636351	0.00467327	0.00561401	0.000276319	0.00636953	0.00726109	0.000426097	0.00107086	0	0	0	0	0	0	0	0
Firmicutes	Bacilli	Lactobacillales	Lactobacillaceae	Lactobacillus	Lactobacillus_intestinalis	0	0	0	0	0	0.00101731	0.000674309	0	0	0.000249844	0.000114718	0.000164747	0	0	0	0	0	0	0	0
Firmicutes	Bacilli	Lactobacillales	Lactobacillaceae	Lactobacillus	unclassified_Lactobacillus	0.00026178	0.00198207	0.0002023	0.000186747	0.0196753	0.0543466	0.0571281	0.00499217	0.00796612	0.0865709	0.00150773	0.00635925	0.00276216	0.00765684	0.00152137	0.000273145	0.00143722	0.00265509	0.00237835	0.00453067
Firmicutes	Bacilli	Lactobacillales	Lactobacillaceae	Latilactobacillus	unclassified_Latilactobacillus	0	0	0	0	0	0	0.000266587	0	0	0	9.83e-05	0	0	0.000482714	0	0.000482021	5.07e-05	0	0	0
Firmicutes	Bacilli	Lactobacillales	Lactobacillaceae	Ligilactobacillus	unclassified_Ligilactobacillus	0	8.74e-05	0	0	0	0.00460969	0.00371654	0	0.00332762	0.00591818	0.000131107	0.00102143	0	0	1.52e-05	0.000321347	0.00918129	0.0374826	0.0222457	0.0527084
Firmicutes	Bacilli	Lactobacillales	Lactobacillaceae	Pediococcus	unclassified_Pediococcus	0	0.000480944	0	0	0	0	0	0	0.000285705	0	0.000180272	0.000230646	0	0.000499359	0	0.000530223	0	0	0	0
Firmicutes	Bacilli	Lactobacillales	Streptococcaceae	Lactococcus	unclassified_Lactococcus	0	0.000655833	0	0	0	0	0	0	0	0	0.00019666	0	0	0.00024968	0	0.000337414	0	0	0	0
Firmicutes	Bacilli	RF39	uncultured_Lachnospiraceae_bacterium	uncultured_Lachnospiraceae_bacterium	uncultured_Lachnospiraceae_bacterium	0	0	0	0	0	0	0	0	0	0	0	0	0	0	0	0	0.00185993	0.000604263	0	0.000547663
Firmicutes	Bacilli	unclassified_Bacilli	unclassified_Bacilli	unclassified_Bacilli	unclassified_Bacilli	0	0	0	0	0	0.00429178	0.00312064	0	0.00105879	0.00382573	0	0.000197697	0.000310539	0	0.000273848	0	0.000405803	0.000274665	0	0
Firmicutes	Clostridia	Christensenellales	Christensenellaceae	Christensenella_sp._Marseille_P2437	unclassified_Christensenella_sp._Marseille_P2437	0	0	0	0	0	0	0	3.68e-05	0	0	0	1.65e-05	0	0	0	0	0.000473437	0.000219732	0.000304	0.00019915
Firmicutes	Clostridia	Clostridia_UCG_014	Unclassified	Unclassified	Unclassified	0	0	0	0	0	0	0	0	0	0	0	0	0	0	0	0	0.00116668	0.000384531	0	0.000381705
Firmicutes	Clostridia	Clostridia_UCG_014	unclassified_Clostridia_UCG_014	unclassified_Clostridia_UCG_014	unclassified_Clostridia_UCG_014	0	0.00266706	1.56e-05	0	0	0	0	0	0	0	1.64e-05	0	0	0	0.00073026	0	0.105915	0.0484143	0.038161	0.0364445
Firmicutes	Clostridia	Clostridia_UCG_014	uncultured_rumen_bacterium	uncultured_rumen_bacterium	uncultured_rumen_bacterium	0	0	0	0	0	0	0	0	0	0	0	0	0	0	0	0	0.00135268	0	0	0
Firmicutes	Clostridia	Clostridia_vadinBB60_group	unclassified_Clostridia_vadinBB60_group	unclassified_Clostridia_vadinBB60_group	unclassified_Clostridia_vadinBB60_group	0	0	0.000342354	0.000202309	0	0	1.57e-05	0	0	0	0	0	0	0	0	0.000482021	0	0	0	0
Firmicutes	Clostridia	Clostridiales	Clostridiaceae	Candidatus_Arthromitus	unclassified_Candidatus_Arthromitus	0	0	0	0	0	0	0	0	1.68e-05	0	0	0	0	0	0	4.82e-05	0.000287444	0.000274665	0.000304	0.000215746
Firmicutes	Clostridia	Clostridiales	Clostridiaceae	Clostridium_sensu_stricto_1	unclassified_Clostridium_sensu_stricto_1	0	0	0	0	0	0	0	0	0.00114282	0	0	0	0	0	0	0	0	0.000659196	0.00098353	0
Firmicutes	Clostridia	Lachnospirales	Defluviitaleaceae	Defluviitaleaceae_UCG_011	unclassified_Defluviitaleaceae_UCG_011	0	0	0	0	0	0	0	0	0	0	0	0	0	0	0	0	0.00148794	0.000384531	0.000590118	0.000315321
Firmicutes	Clostridia	Lachnospirales	Lachnospiraceae	A2	unclassified_A2	0.00193063	0	0.002023	0.00228765	0	0	0	0	0	0	0	0	0	0	0	0.00292426	0.00043962	0.000421153	0.000339765	0
Firmicutes	Clostridia	Lachnospirales	Lachnospiraceae	ASF356	unclassified_ASF356	0.0016034	0.00231728	0.00130717	0.00331476	1.72e-05	0.000222537	7.84e-05	0	0	0	1.64e-05	0	0.00158538	0.000898846	0.00129317	0.00224943	0	0.00184941	0.00112659	0.003203
Firmicutes	Clostridia	Lachnospirales	Lachnospiraceae	Acetatifactor	unclassified_Acetatifactor	0.00222513	0	0.00138498	0.00163404	0	0	0	0	0	0	0	0	0	0	0	0.00179954	0	7.32e-05	0	0
Firmicutes	Clostridia	Lachnospirales	Lachnospiraceae	Blautia	Blautia_sp._N6H1_15	0	0	0	0	0.00510801	0	6.27e-05	0.0011237	0	0	0.000803029	0.00337732	0	0	0	0	0	0	0	0
Firmicutes	Clostridia	Lachnospirales	Lachnospiraceae	Blautia	Lachnospiraceae_bacterium_DW59	0.00479385	0	0.00225642	0.00476205	0	0	4.7e-05	0	0	0	0	0	0	0	0	0.000610559	0.00213047	0.000805684	0.002736	0.00192512
Firmicutes	Clostridia	Lachnospirales	Lachnospiraceae	Blautia	unclassified_Blautia	0.00872055	0.000102019	0.00107375	0.00197641	0	0	0	0.00331583	0	0	0	0.000164747	0	0	0	0.000417751	0.00434547	0.00639054	0.00609789	0.0348513
Firmicutes	Clostridia	Lachnospirales	Lachnospiraceae	GCA_900066575	unclassified_GCA_900066575	0.00633181	0	0.00396819	0.00389057	0	0	0	0.00274477	0	0	0	0.000230646	0	0	0	0.00170314	0.000727064	0.00119021	0.00894119	0.00147703
Firmicutes	Clostridia	Lachnospirales	Lachnospiraceae	Lachnoclostridium	Dorea_sp._5_2	0.00409031	0	0.00250541	0.00172741	0	0	0	0	0	0	0	0	0	0	0	0.00322954	0.000507254	0.00106204	0.00168094	0.00174256
Firmicutes	Clostridia	Lachnospirales	Lachnospiraceae	Lachnoclostridium	unclassified_Lachnoclostridium	0	0	0	0	0.000945927	0	0	0	0	0	0.00068831	0.000790787	0	0	0	0	0	0	0	0
Firmicutes	Clostridia	Lachnospirales	Lachnospiraceae	Lachnospiraceae_FCS020_group	unclassified_Lachnospiraceae_FCS020_group	0.00052356	0	0.000155615	0.000606928	0	0	0	0.000644745	0	0	0	0	0.000294195	0	0	0	0	0	0	0.000647238
Firmicutes	Clostridia	Lachnospirales	Lachnospiraceae	Lachnospiraceae_NK4A136_group	Clostridiales_bacterium_CIEAF_020	0.00292867	0	0.00158728	0.00150954	0	0	0	0	0	0	0	0	0	0	0	0.00430605	0	0.003003	0.00160941	0.00524429
Firmicutes	Clostridia	Lachnospirales	Lachnospiraceae	Lachnospiraceae_NK4A136_group	Lachnospiraceae_bacterium_COE1	0.0055301	0	0.00276995	0.00420181	0	0	0	0	0	0	1.64e-05	0	0	0	0	0	0.00106523	0.00135501	0.000357647	0.00107873
Firmicutes	Clostridia	Lachnospirales	Lachnospiraceae	Lachnospiraceae_NK4A136_group	unclassified_Lachnospiraceae_NK4A136_group	0.0882853	0	0.109756	0.0530362	0	0	0.000203861	0.00887906	0	0	3.28e-05	0.000691939	0	0	0	0.104566	0.0407832	0.0663774	0.0834391	0.0427011
Firmicutes	Clostridia	Lachnospirales	Lachnospiraceae	Lachnospiraceae_NK4A136_group	uncultured_Clostridiales_bacterium	0	0	0	0	0	0	0	0.0147555	0	0	0	6.59e-05	0	0	0	0	0.00268844	0.00148319	0.0418269	0
Firmicutes	Clostridia	Lachnospirales	Lachnospiraceae	Lachnospiraceae_UCG_001	unclassified_Lachnospiraceae_UCG_001	0	0	0	0	0	0	0	0.0139449	0	0	0	0.000691939	0	0	0	0	0	0.00380869	0.00067953	0.00587493
Firmicutes	Clostridia	Lachnospirales	Lachnospiraceae	Lachnospiraceae_UCG_006	unclassified_Lachnospiraceae_UCG_006	0.00299411	0	0.0258788	0.0137104	0	0	0.000219542	0.00215529	0	7.81e-05	0	0.000428343	0	0	0	0.0384974	0.00108214	0.00175786	0.00135906	0.003203
Firmicutes	Clostridia	Lachnospirales	Lachnospiraceae	Marvinbryantia	unclassified_Marvinbryantia	0.000932592	0	0.00638023	0.0064739	0	0	0	0	0	0	0	0	0	0	0	0.00266718	0.00065943	0.00239874	0.00067953	0
Firmicutes	Clostridia	Lachnospirales	Lachnospiraceae	Roseburia	Clostridium_sp._Clone_44	0.00423757	0	0	0.00118273	0	0	0	0	0	0	0	0	0	0	0	0	0	0	0	9.96e-05
Firmicutes	Clostridia	Lachnospirales	Lachnospiraceae	Roseburia	unclassified_Roseburia	0.0129418	0.000539241	0.00659809	0.00557129	0	0	0	0	0	0	0	0	0.000294195	0.000832265	0.000197779	0.00192808	0.00108214	0.000842306	0.00185977	0
Firmicutes	Clostridia	Lachnospirales	Lachnospiraceae	Tuzzerella	unclassified_Tuzzerella	0.000834424	0.000102019	0	0.000591366	0	0	0	0.000515796	0	0	0	0	0.000621077	0.000416133	0.000532481	0.00054629	0.000118359	0.000476086	0.000661648	0.000448088
Firmicutes	Clostridia	Lachnospirales	Lachnospiraceae	Tyzzerella	uncultured_Clostridiales_bacterium	0.00188155	0	0	0.000669177	0	0	0	0	0	0	0	0	0	0	0	0	0	9.16e-05	0	0
Firmicutes	Clostridia	Lachnospirales	Lachnospiraceae	[Eubacterium]_xylanophilum_group	unclassified_[Eubacterium]_xylanophilum_group	0.0111584	0	0.00203856	0.00474649	0	0	0	0	0	0	0	0	0	0	0	0.00739098	0.0019952	0.00498059	0.00722448	0.00746814
Firmicutes	Clostridia	Lachnospirales	Lachnospiraceae	[Ruminococcus]_gnavus_group	unclassified_[Ruminococcus]_gnavus_group	0	0	0	0	0.0154272	0	0	0.0103343	0	0	0.0108982	0.013048	0	0	0	0	0	0	0	0
Firmicutes	Clostridia	Lachnospirales	Lachnospiraceae	unclassified_Lachnospiraceae	Clostridium_sp._Culture_27	0	0	0.000171177	0	0	0	0	0.000368426	0	0	0	0	0	0	0	0	0.000338169	0.00256354	0.000894118	0.00871283
Firmicutes	Clostridia	Lachnospirales	Lachnospiraceae	unclassified_Lachnospiraceae	Clostridium_sp._Culture_41	0.00140707	0	0.00169621	0.0017741	0	0	0	0	0	0	0	0.00105438	0	0	0	0.00480414	0.000456528	0.00146488	0.00234259	0.00104554
Firmicutes	Clostridia	Lachnospirales	Lachnospiraceae	unclassified_Lachnospiraceae	Clostridium_sp._Culture_54	0.00103076	0.00155943	0	0.00048243	0	0	0	0.000921065	0	0	0	0	0.000735486	0.000982073	0.000684619	0	0.000338169	0.000659196	0	0.000730218
Firmicutes	Clostridia	Lachnospirales	Lachnospiraceae	unclassified_Lachnospiraceae	unclassified_Lachnospiraceae	0.415658	0.0150696	0.208058	0.237262	0.00333654	0.00049276	0.00120748	0.0622824	0.000907533	7.81e-05	0.000229437	0.00487652	0.028733	0.0395825	0.0167351	0.235258	0.0560515	0.10278	0.105631	0.113117
Firmicutes	Clostridia	Monoglobales	Monoglobaceae	Monoglobus	unclassified_Monoglobus	0.000179974	0	0.000949254	0.00014006	0	0	1.57e-05	0.00099475	0	0	0	0.00031302	1.63e-05	0	0	0.00024101	0.00250245	0.0021607	0.00336189	0.00174256
Firmicutes	Clostridia	Oscillospirales	Butyricicoccaceae	Butyricicoccus	unclassified_Butyricicoccus	0.000981675	0.000262333	0.000824762	0.00157179	0	0	0	0	0	0	0	0	0.000310539	0.0049603	0	0.000626627	0	0.000659196	0.000500706	0.00333577
Firmicutes	Clostridia	Oscillospirales	Butyricicoccaceae	UCG_009	[Clostridium]_leptum	0	0	0.000124492	0	0	0	0	0.000276319	0	0	0	0	0	0	0	0	0.000152176	0.000512708	0.000232471	0.000331917
Firmicutes	Clostridia	Oscillospirales	Hungateiclostridiaceae	unclassified_Hungateiclostridiaceae	unclassified_Hungateiclostridiaceae	0	0	0	0	0	0	0	0	0	0	0	0	0	0	0	0	0.00202901	0.0010071	0.000536471	0.000979156
Firmicutes	Clostridia	Oscillospirales	Oscillospiraceae	Colidextribacter	unclassified_Colidextribacter	0.00762435	0.00221526	0.00513531	0.0058981	0.000550358	0	0	0.00447638	0	0	0	0.000477767	0.00152001	0.00481049	0.000684619	0.00591279	0.00404112	0.00604263	0.00894119	0.0072026
Firmicutes	Clostridia	Oscillospirales	Oscillospiraceae	Colidextribacter	uncultured_Clostridiales_bacterium	0.000474476	0	0	0	0	0	0	0	0	0	0	0	0	0	0	0	0.000338169	0.000677507	0	0
Firmicutes	Clostridia	Oscillospirales	Oscillospiraceae	Intestinimonas	unclassified_Intestinimonas	0.00183246	0	0.000326792	0.000887049	0	0	0	0	0	0	0	0	0	0	0	0	0.000676338	0.000567641	0.000840471	0.000497876
Firmicutes	Clostridia	Oscillospirales	Oscillospiraceae	NK4A214_group	unclassified_NK4A214_group	0.00155432	0	0.00185182	0.0014006	0	0.000508655	0.000313632	0	0	0	0	0	0	0	0	0.0015264	0.00241791	0.00252692	0.00225318	0.00156001
Firmicutes	Clostridia	Oscillospirales	Oscillospiraceae	Oscillibacter	unclassified_Oscillibacter	0.00881872	0.000247759	0.002023	0.00340814	0	0	0	0.00736852	0	0	0	0	0.000817207	0.00024968	0.000410771	0.00416144	0.00194447	0.00525526	0.00305789	0.00580855
Firmicutes	Clostridia	Oscillospirales	Oscillospiraceae	UCG_005	unclassified_UCG_005	0.000196335	0	0.00130717	0.00104267	0	0	0	0.00127107	0	0	0	0	0	0	0	0.000931907	0.000625613	0.000640885	0.000357647	0.000514472
Firmicutes	Clostridia	Oscillospirales	Oscillospiraceae	UCG_005	uncultured_Clostridiales_bacterium	0	0	0	0	0	0	0	0.00123423	0	0	0	0	0	0	0	6.43e-05	0.000338169	0.000384531	0.000125177	0.00019915
Firmicutes	Clostridia	Oscillospirales	Oscillospiraceae	unclassified_Oscillospiraceae	unclassified_Oscillospiraceae	0.044519	0	0.0176001	0.0264403	0.00147909	0.00155776	0.00167793	0.010537	0.000420154	0.00246721	3.28e-05	0.000461293	0	0	0	0.0344002	0.0100098	0.0187138	0.0147708	0.0276653
Firmicutes	Clostridia	Oscillospirales	Oscillospiraceae	unclassified_Oscillospiraceae	uncultured_Clostridiales_bacterium	0	0	0	0	0	0	0	0	0	0	0	0	0	0	0	0	0.000997599	0.000292976	0.00402353	0.000182554
Firmicutes	Clostridia	Oscillospirales	Oscillospiraceae	unclassified_Oscillospiraceae	uncultured_Oscillospira_sp.	0	0	0	0	0	0	0	0	0	0	0	0	0	0	0	0.000819435	0	0	0.000178824	0.000398301
Firmicutes	Clostridia	Oscillospirales	Ruminococcaceae	Anaerotruncus	Anaerotruncus_colihominis	8.18e-05	0.005509	0	0	0	0	0	0	0	0	0	0	0.00116043	0.00564276	0.000912825	0	0	0	0	0
Firmicutes	Clostridia	Oscillospirales	Ruminococcaceae	Anaerotruncus	unclassified_Anaerotruncus	0.00188155	0	0.000871446	0.0015251	0	0	0	0.000663167	0	0	0	0	0	0	0	0.00284392	0.000557979	0.00111697	0.00300424	0.0016098
Firmicutes	Clostridia	Oscillospirales	Ruminococcaceae	Harryflintia	unclassified_Harryflintia	0.000752618	0	0.000435723	6.22e-05	0	0	0	0.000460532	0	0	0	0	0	0	0	0.000867637	0	0.00018311	8.94e-05	0.000165959
Firmicutes	Clostridia	Oscillospirales	Ruminococcaceae	Incertae_Sedis	unclassified_Incertae_Sedis	0.00265052	0.00467828	0.00107375	0	0	0	0	0	0	0	0	0	0.0054426	0.0086722	0.00613114	0.0030046	0	0.000640885	0	0.00215746
Firmicutes	Clostridia	Oscillospirales	Ruminococcaceae	Incertae_Sedis	uncultured_Clostridiales_bacterium	0	0	0.000217862	0.000295683	0	0	0	0	0	0	0	0	0	0	0	0.00109258	0	0	0	0
Firmicutes	Clostridia	Oscillospirales	Ruminococcaceae	Negativibacillus	unclassified_Negativibacillus	0.000114529	0.00136996	0.000124492	0	0	0	0	0.000589481	0	0	0	0	0.00047398	0.00204737	0.000532481	0	0	9.16e-05	0.000107294	0
Firmicutes	Clostridia	Oscillospirales	Ruminococcaceae	Paludicola	unclassified_Paludicola	6.54e-05	0.000510093	0	0.000404619	0	0	0	0	0	0	0	0	0.000441292	0.00138156	0.000182565	0.000385617	0	0.000146488	0	0.000298725
Firmicutes	Clostridia	Oscillospirales	Ruminococcaceae	Ruminococcus	unclassified_Ruminococcus	0	0	0	3.11e-05	0	0	0	0.000128949	1.68e-05	0	0	0	0	0	0	0	0.00145413	0.00739764	0.00246777	0.00404939
Firmicutes	Clostridia	Oscillospirales	Ruminococcaceae	UBA1819	unclassified_UBA1819	0.000229058	0.00445967	0.000653585	0.000186747	0	0	0	0.00219213	1.68e-05	0	0	0	0.00228818	0.00624199	0.00085197	0.00220123	0	0	0	4.98e-05
Firmicutes	Clostridia	Oscillospirales	Ruminococcaceae	[Eubacterium]_siraeum_group	unclassified_[Eubacterium]_siraeum_group	0	0	0	0	0	0	0	0	0	0	0	0	0	0	0	0	0.000405803	0.000952172	0.000786824	0.00219065
Firmicutes	Clostridia	Oscillospirales	Ruminococcaceae	unclassified_Ruminococcaceae	[Clostridium]_leptum	0.00471204	0	0.000793638	0.00182078	0	0	0	0	0	0	0	0	0	0	0	0.00255471	0	0.000988794	0.00107294	0.00156001
Firmicutes	Clostridia	Oscillospirales	Ruminococcaceae	unclassified_Ruminococcaceae	unclassified_Ruminococcaceae	0.00557919	0.000757852	0.00269215	0.00236546	0	0	0	0.00119738	0	0	0	0	0.000490324	0.0019475	0.000547695	0.0078248	0.000845423	0.000714129	0.000715295	0.000215746
Firmicutes	Clostridia	Oscillospirales	Ruminococcaceae	uncultured_Clostridiales_bacterium	uncultured_Clostridiales_bacterium	0	0	0	0	0	0	0	0	0	0	0	0	0.00142194	0.00436107	0.00101932	0	0	0	0.000107294	0
Firmicutes	Clostridia	Oscillospirales	UCG_010	unclassified_UCG_010	unclassified_UCG_010	0.000834424	0	0.00127605	0.00122942	0	0	0	0	0	0	0	1.65e-05	0	0	0	0.000514155	0.0127321	0.00823995	0.00665224	0.00411577
Firmicutes	Clostridia	Oscillospirales	[Eubacterium]_coprostanoligenes_group	unclassified_[Eubacterium]_coprostanoligenes_group	unclassified_[Eubacterium]_coprostanoligenes_group	0	0	0	0	0	0	1.57e-05	0	0	0	0	0	0	0	0	0	0.000557979	0.00245367	0.000357647	0.00127788
Firmicutes	Clostridia	Peptococcales	Peptococcaceae	Peptococcus	unclassified_Peptococcus	0.000310864	0	7.78e-05	0.000171185	0	0	0	0	0	0	0	0	0	0	0	0	0.000202901	0.000238043	0.000643765	0.000448088
Firmicutes	Clostridia	Peptococcales	Peptococcaceae	unclassified_Peptococcaceae	unclassified_Peptococcaceae	0.00135798	0	0.00127605	0.000840362	0	0	0	0	0	0	0	0	0	0	0	0.00024101	0.00113287	0.00206914	0.00252141	0.00114511
Firmicutes	Clostridia	Peptostreptococcales_Tissierellales	Anaerovoracaceae	Family_XIII_UCG_001	unclassified_Family_XIII_UCG_001	0.00163613	0	0.000513531	0.000715864	0	0	0	0.000239477	0	0	0	0	0	0	0	0.000771233	0.00021981	0.000714129	0.000500706	0.000315321
Firmicutes	Clostridia	Peptostreptococcales_Tissierellales	Anaerovoracaceae	[Eubacterium]_brachy_group	unclassified_[Eubacterium]_brachy_group	0	0	0.000217862	0	0	0	1.57e-05	0.000313162	0	0	0	0	0	0	0	0	0	0.00036622	0	0.000448088
Firmicutes	Clostridia	Peptostreptococcales_Tissierellales	Anaerovoracaceae	[Eubacterium]_nodatum_group	unclassified_[Eubacterium]_nodatum_group	0.00013089	0	0.00102706	0.0008248	0	0	1.57e-05	0.000828958	0	0	0	0.000247121	0	0	0	0.00112472	0	0.00091555	0.000608001	0.00048128
Firmicutes	Clostridia	unclassified_Clostridia	unclassified_Clostridia	unclassified_Clostridia	unclassified_Clostridia	0	0	0.000108931	0.000435743	0	0	0	1.84e-05	0	0	0	0	0	0	0	0	0.00250245	0.00221563	0.00067953	0.00096256
Patescibacteria	Saccharimonadia	Saccharimonadales	Saccharimonadaceae	Candidatus_Saccharimonas	unclassified_Candidatus_Saccharimonas	0.00423757	0.00225898	0.0251163	0.00781226	6.88e-05	6.36e-05	0.000203861	0	0	0	6.56e-05	4.94e-05	0.00027785	0.00136491	0	0.0094476	0.0295729	0.0356149	0.0180791	0.0249104
Proteobacteria	Alphaproteobacteria	Rhodospirillales	unclassified_Rhodospirillales	Azospirillum_sp._47_25	unclassified_Rhodospirillales	0	0	0	0	0	0.000206641	0	0	3.36e-05	0	0	0	0	0	0	0	0.000456528	0.00153812	0	0.000514472
Proteobacteria	Alphaproteobacteria	Rhodospirillales	unclassified_Rhodospirillales	uncultured_rumen_bacterium	unclassified_Rhodospirillales	0	0	0	0	0	0	0	0.000792116	0	0	0	6.59e-05	0	0	0	0	0.000135268	0.000439464	0	0
Proteobacteria	Alphaproteobacteria	Rickettsiales	Mitochondria	Brassica_napus__rape	unclassified_Brassica_napus__rape	0	0.00103476	0	0	0	0.000286118	0.000188179	0	0.000235286	6.25e-05	0.000213048	0.000230646	0	0.000782329	0	0.00085157	0	0	0.000214588	0.000232342
Proteobacteria	Gammaproteobacteria	Burkholderiales	Alcaligenaceae	Achromobacter	unclassified_Achromobacter	0.00013089	0.000131167	0.000264546	0.000186747	0	4.77e-05	0	0	0	7.81e-05	0	3.29e-05	0.00019613	0.000416133	4.56e-05	0.00024101	0.000135268	0	0	9.96e-05
Proteobacteria	Gammaproteobacteria	Burkholderiales	Sutterellaceae	Parasutterella	Burkholderiales_bacterium_YL45	0.000229058	0	0	0.00014006	0.000309576	0.0452703	0.0349072	9.21e-05	0.0665356	0.0309338	0.00019666	0.000576616	0	0	0	9.64e-05	0.0272057	0.0284736	0.00890542	0.0191516
Proteobacteria	Gammaproteobacteria	Burkholderiales	Sutterellaceae	Parasutterella	unclassified_Parasutterella	0.000179974	0.000204037	1.56e-05	0	0.0823473	0.0118739	0.0166539	0.0436769	0.0256798	0.0383354	0.0509513	0.0561789	0.000114409	0.000216389	0.000136924	6.43e-05	0.00781171	0.00505383	0.00329036	0.00497876
Proteobacteria	Gammaproteobacteria	Enterobacterales	Enterobacteriaceae	Citrobacter	unclassified_Citrobacter	0	0	0	0	0	0.0394208	0.0327745	0	0.0941649	0.00671455	0	0.000230646	0	0	0	0	0	0	0	0
Proteobacteria	Gammaproteobacteria	Enterobacterales	Enterobacteriaceae	Enterobacter	unclassified_Enterobacter	0	0	0	0	0.00139309	0.00364006	0.00470448	0.000736852	0.0135962	0.00874453	0.00113079	0.000691939	0	0	0	0	0	0	0	0
Proteobacteria	Gammaproteobacteria	Enterobacterales	Enterobacteriaceae	Escherichia_Shigella	unclassified_Escherichia_Shigella	0.000556283	0.0011222	0.0002023	0.000871487	0.0431515	0.0201555	0.0363186	0.0470111	0.033377	0.111399	0.0928727	0.0604293	0.000408604	0.000932137	0.000349916	0.00131752	0.000642521	0.000585952	0.000411295	0.00068043
Proteobacteria	Gammaproteobacteria	Enterobacterales	Enterobacteriaceae	Klebsiella	unclassified_Klebsiella	0	0	0	0	0.00748142	0	0	0.0197661	0	0	0.0237795	0.0034597	0	0	0	0.000208876	0	0	0	0
Proteobacteria	Gammaproteobacteria	Enterobacterales	Enterobacteriaceae	unclassified_Enterobacteriaceae	unclassified_Enterobacteriaceae	0	0.000174889	0.000140054	0	0.00347413	0.0220629	0.021672	0.00891591	0.0172767	0.0153966	0.0122421	0.00281718	0	0.00028297	0.000106496	0.000160674	0.000202901	0	0	4.98e-05
Proteobacteria	Gammaproteobacteria	Enterobacterales	Morganellaceae	Proteus	unclassified_Proteus	0.000229058	8.74e-05	9.34e-05	0.000171185	0.0090637	0.0189474	0.0349072	0.0068343	0.028268	0.0793879	0.0104394	0.00555199	4.9e-05	0.000233034	9.13e-05	0.000128539	0	0.000146488	1.79e-05	0
Proteobacteria	Gammaproteobacteria	Pseudomonadales	Moraxellaceae	Acinetobacter	unclassified_Acinetobacter	0	0	0	0.00129167	0	0	0	0	0	0	0	0	9.81e-05	0.000183098	0	0	0	0	3.58e-05	0
Verrucomicrobiota	Verrucomicrobiae	Verrucomicrobiales	Akkermansiaceae	Akkermansia	unclassified_Akkermansia	0.00175065	0.501304	0.00132273	0.00160291	0.0658365	0.2281	0.280905	0.0741273	0.287537	0.264335	0.191432	0.237763	0.346087	0.211312	0.549323	0.00187988	0.00263772	0.00195928	0.0171492	0.00136086

## Sheet: Table S3-level1
Class1	Water1	Water2	Water3	Water4	Azithromycin1	Azithromycin2	Azithromycin3	Azithromycin4	Amoxicillin1	Amoxicillin2	Amoxicillin3	Amoxicillin4	Metronidazole1	Metronidazole2	Metronidazole3	Metronidazole4	Levofloxacin1	Levofloxacin2	Levofloxacin3	Levofloxacin4
Cellular Processes	0.0366654	0.0351364	0.03493	0.034323	0.0257752	0.0258413	0.0257399	0.0284277	0.024288	0.0258406	0.0247622	0.0250199	0.0265861	0.0281142	0.0254206	0.0258203	0.0321919	0.0342022	0.0369668	0.0345647
Environmental Information Processing	0.0715681	0.0666143	0.0640332	0.0625026	0.0502192	0.0517488	0.0501445	0.0561251	0.0598018	0.0692798	0.0572917	0.0593803	0.0476649	0.0507217	0.0468201	0.0482647	0.059853	0.0672543	0.0701431	0.0684903
Genetic Information Processing	0.0805256	0.0781609	0.0787669	0.0794541	0.0726011	0.0710547	0.0731684	0.0736142	0.0771467	0.083819	0.0794611	0.0805395	0.0809242	0.0816467	0.0817301	0.0829626	0.0869454	0.0859074	0.0846799	0.0863828
Human Diseases	0.0230612	0.0232061	0.0233707	0.0235907	0.0248264	0.0255815	0.0250357	0.0247215	0.0265035	0.0292753	0.0264972	0.0270372	0.0244944	0.0242852	0.0247417	0.024592	0.0234301	0.0233576	0.0237383	0.0235034
Metabolism	0.775092	0.783069	0.785165	0.786268	0.810441	0.809754	0.809911	0.801751	0.797494	0.777687	0.796759	0.793041	0.8054	0.800486	0.806263	0.80352	0.783553	0.775998	0.771427	0.773891
Organismal Systems	0.0130878	0.0138131	0.0137341	0.0138621	0.016137	0.01602	0.0160002	0.0153608	0.0147662	0.0140978	0.0152288	0.0149819	0.0149303	0.0147462	0.0150247	0.0148403	0.0140267	0.0132801	0.0130445	0.0131675

## Sheet: Table S3-level2
Class2	Water1	Water2	Water3	Water4	Azithromycin1	Azithromycin2	Azithromycin3	Azithromycin4	Amoxicillin1	Amoxicillin2	Amoxicillin3	Amoxicillin4	Metronidazole1	Metronidazole2	Metronidazole3	Metronidazole4	Levofloxacin1	Levofloxacin2	Levofloxacin3	Levofloxacin4
Aging	0.00254317	0.00257699	0.00254903	0.00260222	0.00249516	0.0026562	0.00266447	0.00259888	0.00318292	0.00330798	0.00292332	0.00307411	0.00333111	0.00314669	0.00352036	0.00344691	0.00278225	0.00270174	0.00275274	0.00266449
Amino acid metabolism	0.0663274	0.0651772	0.0654195	0.0664961	0.0635889	0.0639016	0.0640124	0.064156	0.0676602	0.0630853	0.064405	0.0642914	0.0684726	0.0680367	0.0685381	0.0686762	0.0658383	0.065269	0.0654717	0.0650343
Biosynthesis of other secondary metabolites	0.0111491	0.0120032	0.0121669	0.0119079	0.0140506	0.0135645	0.0138278	0.0130626	0.011434	0.00950636	0.0121016	0.0114789	0.0122593	0.0121384	0.0119651	0.0117179	0.0107133	0.01056	0.0104947	0.010415
Cancers: Overview	0.0047877	0.00481042	0.00479997	0.00480818	0.00493241	0.00494607	0.00490196	0.0048828	0.00512356	0.00570357	0.00545712	0.00552406	0.00512257	0.00505438	0.00532178	0.0053331	0.00449094	0.0047271	0.00474414	0.00486319
Cancers: Specific types	0.000451621	0.000483083	0.000506859	0.000524928	0.000667925	0.000700527	0.000657974	0.000633097	0.000890376	0.000950622	0.000776101	0.000792889	0.000437189	0.000445121	0.000438197	0.00045126	0.000516875	0.000474279	0.000467528	0.000450143
Carbohydrate metabolism	0.101536	0.105183	0.104162	0.102704	0.11695	0.115315	0.114691	0.112089	0.100387	0.0990851	0.107462	0.105059	0.100187	0.100135	0.0992567	0.0975742	0.0962499	0.0979724	0.0972511	0.0982327
Cardiovascular diseases	7.61228e-06	7.26647e-06	1.87853e-05	1.96203e-05	1.29684e-06	6.76964e-07	1.77776e-06	4.84252e-06	2.14183e-05	1.35232e-06	1.49076e-05	1.04556e-05	2.46523e-07	4.93877e-07	9.75246e-08	2.52133e-07	1.0399e-05	5.84731e-06	1.67759e-05	5.72742e-06
Cell growth and death	0.00518296	0.00545831	0.0055722	0.00550737	0.00560464	0.00538673	0.0055248	0.0054715	0.00503968	0.00483163	0.00544788	0.00526516	0.00530301	0.00540179	0.00504504	0.00507238	0.00584481	0.00565192	0.00556607	0.00562563
Cell motility	0.0126345	0.011127	0.011083	0.0107647	0.00107979	0.00139829	0.0012735	0.00386509	0.0024833	0.00371444	0.00199149	0.00243936	0.00290374	0.00441362	0.00191716	0.00236802	0.00939959	0.010934	0.013933	0.0112621
Cellular community - prokaryotes	0.0157022	0.0143459	0.0138712	0.0136681	0.0108774	0.0108589	0.0107694	0.0121541	0.0110869	0.0129981	0.0112978	0.0115891	0.0110886	0.0119256	0.0106505	0.0110715	0.0134687	0.0146683	0.0146757	0.0149417
Circulatory system	1.37021e-05	7.10133e-06	1.68455e-05	2.22757e-05	3.71469e-06	1.37024e-06	2.209e-06	9.15984e-06	2.14335e-05	1.79814e-06	2.12093e-05	1.85816e-05	7.3957e-07	1.48163e-06	1.75544e-07	5.23661e-07	2.76851e-05	8.71389e-06	4.7328e-05	9.31569e-06
Digestive system	0.000162186	0.000412244	0.000402825	0.00038952	0.000872057	0.000871187	0.000823288	0.000761308	0.000541494	0.000363001	0.000696012	0.000621672	0.000255522	0.000267622	0.000182312	0.00016121	0.000480808	0.000339258	0.000246553	0.000329522
Drug resistance: Antimicrobial	0.00940226	0.00948864	0.00938617	0.00942677	0.0105119	0.010765	0.0106307	0.010438	0.0110481	0.0115223	0.0109439	0.0110579	0.0105869	0.0102708	0.0108866	0.0107029	0.00990583	0.00979018	0.00961462	0.00970435
Drug resistance: Antineoplastic	8.8869e-06	1.21016e-05	2.07622e-05	2.67048e-05	4.03926e-05	0.000101887	5.34208e-05	6.62998e-05	0.000162748	0.000265203	0.000100203	0.00013446	5.52623e-06	1.37693e-05	1.69693e-06	8.94103e-06	1.36619e-05	1.06292e-05	1.77141e-05	8.91316e-06
Endocrine and metabolic diseases	0.00207489	0.00212024	0.00212986	0.00213266	0.00217289	0.00214804	0.00217522	0.00210496	0.00181597	0.00188362	0.0019486	0.00195148	0.00216782	0.00218108	0.00219069	0.00221328	0.00209687	0.00204765	0.00206168	0.0020449
Endocrine system	0.00524788	0.00530586	0.00533775	0.00540128	0.00682858	0.00659973	0.00668701	0.00627272	0.00617937	0.00581615	0.0064863	0.00628833	0.00579164	0.00570592	0.0059456	0.00589387	0.005701	0.00531991	0.0049127	0.00518884
Energy metabolism	0.0366616	0.0385642	0.0390258	0.0389615	0.0435792	0.0432423	0.043091	0.0423142	0.0421592	0.0415092	0.0417616	0.0414946	0.0394899	0.0396128	0.0388867	0.0390555	0.0410773	0.0391843	0.0386475	0.0387718
Environmental adaptation	0.00186732	0.00189599	0.00192209	0.00192312	0.00181066	0.00177849	0.00171833	0.0018214	0.00165639	0.00148938	0.0016685	0.00159706	0.00147261	0.00160348	0.00129238	0.00133421	0.0017947	0.00180879	0.00194409	0.00181756
Excretory system	0.000120664	0.000225875	0.000210945	0.000210502	0.000310913	0.000364353	0.000359424	0.000288717	0.000387221	0.000447826	0.000384085	0.000418046	0.00056269	0.000483189	0.000664883	0.000631982	0.000238331	0.000188623	0.000167413	0.000174985
Folding, sorting and degradation	0.0150812	0.0146298	0.0148067	0.014917	0.0140741	0.0140268	0.0142862	0.0141724	0.0154716	0.016419	0.0152828	0.0155536	0.0156358	0.01554	0.0160257	0.0161269	0.0156737	0.0156487	0.0155833	0.0157481
Global and overview maps	0.418947	0.418986	0.420201	0.421069	0.419056	0.419778	0.420655	0.419476	0.426453	0.41342	0.419721	0.41936	0.429303	0.426314	0.432956	0.432802	0.42272	0.419412	0.418506	0.418525
Glycan biosynthesis and metabolism	0.0140132	0.0175107	0.0180519	0.0178447	0.0272911	0.0272563	0.0275759	0.0241368	0.0221296	0.0191322	0.0229766	0.0223556	0.0261886	0.0238003	0.0277904	0.02672	0.0168555	0.0153378	0.0149773	0.0149604
Immune diseases	0.000501711	0.000481927	0.000484352	0.000495598	0.000410169	0.000377142	0.000386557	0.000414703	0.000510075	0.000636764	0.000517019	0.000525378	0.000448118	0.000517899	0.000312157	0.000348118	0.000544224	0.000527793	0.000493624	0.000510074
Immune system	0.000843255	0.000890372	0.000886862	0.000904607	0.0010419	0.00100214	0.00101779	0.000963216	0.000832112	0.000645859	0.000858939	0.0008065	0.000845431	0.000837477	0.000861317	0.000873157	0.000856219	0.000800219	0.000818822	0.00080598
Infectious diseases: Bacterial	0.004281	0.00443725	0.00453051	0.00459196	0.00477571	0.00515316	0.00489037	0.00479201	0.0052157	0.00670474	0.00508503	0.00538857	0.00448482	0.00459165	0.00432315	0.00436353	0.0045679	0.00452077	0.00474359	0.00463345
Infectious diseases: Parasitic	0.000282097	0.000284108	0.00027983	0.000289214	0.00027156	0.000266895	0.000243263	0.00024428	0.00031789	0.000345555	0.000350832	0.000340442	0.000135917	0.000174516	9.62177e-05	5.65166e-05	0.000104576	0.000151802	0.000184325	0.000176584
Infectious diseases: Viral	2.28368e-05	2.17994e-05	5.63558e-05	5.88609e-05	3.89053e-06	2.03089e-06	5.33328e-06	1.45276e-05	6.42549e-05	4.05696e-06	4.47229e-05	3.13667e-05	7.3957e-07	1.48163e-06	2.92574e-07	7.564e-07	3.11971e-05	1.75419e-05	5.03277e-05	1.71823e-05
Lipid metabolism	0.020661	0.0204339	0.0204142	0.0208358	0.0215452	0.0213573	0.0213082	0.0208696	0.0200794	0.0202039	0.0206464	0.0204472	0.0217373	0.0219161	0.0205476	0.0199507	0.0190346	0.0191472	0.0190613	0.0191387
Membrane transport	0.0431931	0.0390413	0.037058	0.0354906	0.0247556	0.0259612	0.0247574	0.0300271	0.031945	0.0404687	0.0311172	0.0328483	0.0237257	0.0262244	0.0231625	0.0247389	0.0337919	0.0397653	0.0410199	0.0405381
Metabolism of cofactors and vitamins	0.0397118	0.039095	0.0397338	0.0401825	0.0389344	0.0398005	0.0396428	0.0396552	0.0409501	0.0395291	0.0399983	0.0402235	0.0430821	0.0420688	0.0436814	0.0432937	0.0420485	0.0398786	0.0394736	0.0392525
Metabolism of other amino acids	0.0123096	0.0130001	0.0131348	0.0131888	0.01447	0.0146199	0.0142773	0.0141384	0.0136722	0.0147365	0.0140618	0.0140969	0.0137071	0.0140832	0.0126602	0.0127145	0.01305	0.0129372	0.0125943	0.0129355
Metabolism of terpenoids and polyketides	0.0105721	0.010301	0.0104073	0.0104545	0.00989644	0.0098726	0.00997414	0.009928	0.0100941	0.01037	0.0102216	0.0102327	0.00985646	0.0099374	0.00996531	0.0100651	0.0107524	0.0105778	0.0105962	0.0106359
Nervous system	0.00228958	0.00249867	0.00240779	0.00240861	0.00277401	0.0027465	0.00272763	0.00264544	0.00196524	0.00202583	0.0021904	0.00215757	0.00267057	0.00270034	0.0025577	0.00249841	0.00214568	0.00211281	0.00215488	0.00217685
Neurodegenerative diseases	0.00124057	0.00105798	0.00115352	0.00121616	0.00103702	0.00111897	0.00108786	0.00112601	0.00133342	0.00125751	0.00125867	0.00127993	0.00110459	0.00103394	0.00117072	0.00111338	0.00114762	0.0010839	0.00134402	0.00108819
Nucleotide metabolism	0.0367374	0.036075	0.0359796	0.0360284	0.0343406	0.0338645	0.0342033	0.034939	0.0340446	0.0376439	0.0354159	0.0358489	0.0346232	0.0354973	0.0340008	0.0346117	0.0386194	0.038499	0.0375036	0.0385325
Replication and repair	0.0301001	0.0299425	0.0299317	0.030001	0.0296642	0.028721	0.0294228	0.0292726	0.0286737	0.0309328	0.0300715	0.0302117	0.0293222	0.0297732	0.0293334	0.0297975	0.032188	0.0319599	0.0313631	0.0320986
Signal transduction	0.0279773	0.027191	0.0265855	0.0266169	0.0251226	0.0254535	0.0250391	0.0257447	0.0274747	0.0283963	0.0257785	0.0261297	0.0235138	0.0240703	0.0232262	0.0230874	0.025609	0.0270501	0.028693	0.0275118
Signaling molecules and interaction	0.000397689	0.000381985	0.000389711	0.000395021	0.00034096	0.000334143	0.000348062	0.000353263	0.00038216	0.00041482	0.000395937	0.000402322	0.000425376	0.000427006	0.00043139	0.000438479	0.000452139	0.000438904	0.000430162	0.000440494
Substance dependence	0	1.26613e-06	3.67538e-06	6.01235e-08	1.20892e-06	1.02768e-06	1.26731e-06	0	0	0	0	2.43782e-07	0	0	0	0	0	1.52208e-07	0	7.24554e-07
Transcription	0.0015602	0.00150296	0.00149789	0.00151455	0.00147991	0.00141745	0.00147955	0.00143863	0.0014406	0.00167783	0.00152902	0.00156372	0.00148762	0.00148503	0.00157516	0.00160268	0.00160977	0.00163679	0.00160545	0.00167126
Translation	0.0337841	0.0320856	0.0325307	0.0330216	0.027383	0.0268895	0.0279799	0.0287306	0.0315607	0.0347894	0.0325778	0.0332105	0.0344786	0.0348485	0.0347959	0.0354356	0.037474	0.036662	0.0361281	0.0368648
Transport and catabolism	0.00314585	0.0042052	0.00440365	0.00438287	0.00821341	0.00819733	0.0081722	0.00693701	0.00567818	0.00429647	0.00602503	0.00572622	0.00729077	0.00637317	0.00780788	0.00730847	0.00347888	0.00294804	0.00279213	0.00273532
Xenobiotics biodegradation and metabolism	0.00646583	0.00674013	0.00646834	0.00659462	0.00673856	0.00718105	0.00665275	0.00698637	0.00843092	0.00946615	0.00798695	0.00815259	0.00649318	0.00694636	0.00601481	0.00633832	0.00659375	0.0072228	0.00684943	0.00745727

## Sheet: Table S3-level3
Class3_name	Water1	Water2	Water3	Water4	Azithromycin1	Azithromycin2	Azithromycin3	Azithromycin4	Amoxicillin1	Amoxicillin2	Amoxicillin3	Amoxicillin4	Metronidazole1	Metronidazole2	Metronidazole3	Metronidazole4	Levofloxacin1	Levofloxacin2	Levofloxacin3	Levofloxacin4
2-Oxocarboxylic acid metabolism	0.00876707	0.00839898	0.00846832	0.008535	0.00744157	0.00754132	0.00760581	0.00765883	0.00805616	0.00711362	0.00743761	0.00747434	0.00862575	0.0084385	0.00897394	0.00897486	0.0078648	0.00804354	0.00838406	0.00799514
ABC transporters	0.0362118	0.0319569	0.030266	0.0289122	0.0185876	0.0193548	0.0185804	0.023277	0.0228283	0.0274269	0.0217037	0.0227742	0.0176813	0.0199399	0.0169287	0.0182542	0.0268131	0.0314786	0.0329201	0.0320997
AMPK signaling pathway	0.00127303	0.00112046	0.00111967	0.00110559	0.000873149	0.000867068	0.00087552	0.000926924	0.000834185	0.000709686	0.000857284	0.00084342	0.000871399	0.000834751	0.0010103	0.00100944	0.00101183	0.00105434	0.0011257	0.00107957
Acarbose and validamycin biosynthesis	0.000808451	0.000906603	0.000950522	0.000908566	0.00109155	0.00107499	0.00112757	0.000997318	0.00100318	0.000952747	0.00105425	0.00103357	0.00101397	0.000938465	0.00111024	0.00109081	0.000892061	0.000838411	0.000833265	0.000813455
Adipocytokine signaling pathway	0.000506164	0.000587061	0.000633168	0.00065738	0.00119552	0.00112173	0.00112501	0.00102272	0.00096675	0.00071034	0.000935896	0.000862299	0.000850403	0.000854071	0.000738807	0.000711035	0.000901601	0.000669194	0.000523719	0.000581184
African trypanosomiasis	3.23965e-06	5.30306e-06	1.33186e-05	1.33574e-05	9.61276e-06	2.40363e-05	1.41517e-05	1.36018e-05	5.63278e-05	6.93101e-05	3.78229e-05	4.41111e-05	3.08154e-07	8.29713e-07	2.92574e-07	7.1761e-07	1.65637e-06	1.71234e-06	7.65347e-07	1.00057e-06
Alanine, aspartate and glutamate metabolism	0.00997353	0.0101974	0.0102081	0.0104035	0.0110929	0.0107013	0.0107985	0.0106529	0.0105305	0.0101487	0.0103399	0.0101518	0.0104502	0.010761	0.00960488	0.00964262	0.0106014	0.0103544	0.0101159	0.0102934
Alcoholism	0	4.22043e-07	1.22513e-06	2.00412e-08	4.02974e-07	3.4256e-07	4.22438e-07	0	0	0	0	8.12608e-08	0	0	0	0	0	5.07359e-08	0	2.41518e-07
Alzheimer disease	0.00043213	0.000409097	0.000448573	0.000455565	0.000356383	0.000361964	0.000365831	0.000393517	0.000467528	0.000466075	0.000457375	0.000461656	0.000431128	0.000433584	0.000434901	0.000447284	0.000524671	0.000494815	0.000543347	0.000496756
Amino sugar and nucleotide sugar metabolism	0.012495	0.0135478	0.0133085	0.0129117	0.0163404	0.0157716	0.0160305	0.01504	0.013471	0.0134187	0.0153692	0.0148801	0.0134134	0.0130038	0.0139946	0.0135565	0.0121606	0.0126426	0.0125722	0.0127744
Aminoacyl-tRNA biosynthesis	0.0102134	0.00952058	0.00958561	0.00974887	0.00780382	0.00768329	0.00803121	0.00826903	0.00927096	0.010193	0.00945087	0.00967789	0.0100238	0.0100446	0.0103347	0.0105104	0.0108721	0.0107644	0.0106908	0.010858
Aminobenzoate degradation	0.000424801	0.00056284	0.000561888	0.00053095	0.000993895	0.000967862	0.000922296	0.000844521	0.000777888	0.000818139	0.000834255	0.000792916	0.000440969	0.000455335	0.000446272	0.000439992	0.000359955	0.000506129	0.000446296	0.000509212
Amoebiasis	0.000268067	0.0002663	0.000234463	0.000243821	0.000251038	0.000218145	0.000213182	0.000212234	0.000183816	0.000205582	0.000260279	0.000241765	0.000135177	0.00017258	9.55351e-05	5.48293e-05	9.16484e-05	0.000142936	0.000166043	0.000168856
Amphetamine addiction	0	4.22043e-07	1.22513e-06	2.00412e-08	4.02974e-07	3.4256e-07	4.22438e-07	0	0	0	0	8.12608e-08	0	0	0	0	0	5.07359e-08	0	2.41518e-07
Amyotrophic lateral sclerosis (ALS)	0.000206974	0.00013054	0.000134244	0.000149697	5.45553e-05	8.61865e-05	9.1361e-05	8.74591e-05	0.000199487	0.000202833	0.000151826	0.000179207	0.000182263	0.000120545	0.00026082	0.000225931	8.68536e-05	0.000116515	0.000202582	0.000131639
Antigen processing and presentation	0.000421605	0.000444842	0.000443431	0.000451888	0.000518627	0.00049725	0.000507366	0.000478208	0.000409249	0.000317721	0.000420686	0.00039532	0.000421925	0.000414837	0.000430064	0.000432098	0.000424728	0.000387001	0.000401721	0.000384727
Apoptosis	0.000157583	0.000300476	0.000351064	0.000352644	0.000711249	0.000661712	0.000662524	0.000586933	0.000364446	0.000187794	0.000498126	0.000402322	0.000433676	0.000460353	0.000307924	0.000301125	0.000366693	0.00024702	0.000220704	0.000229246
Apoptosis - fly	0.000205222	0.000288723	0.000317948	0.000288442	0.000341649	0.000340774	0.00034595	0.000323389	0.00044422	0.000369169	0.000404123	0.000403717	0.000403497	0.000374872	0.000412646	0.000406768	0.000393307	0.000356255	0.000299571	0.000329833
Apoptosis - multiple species	7.61228e-06	7.26647e-06	1.87853e-05	1.96203e-05	1.29684e-06	6.76964e-07	1.77776e-06	4.84252e-06	2.14183e-05	1.35232e-06	1.49076e-05	1.04556e-05	2.46523e-07	4.93877e-07	9.75246e-08	2.52133e-07	1.0399e-05	5.84731e-06	1.67759e-05	5.72742e-06
Arachidonic acid metabolism	0.000122204	0.000166147	0.000192995	0.000211975	0.000282976	0.000297318	0.000275746	0.000264798	0.000219701	0.000201273	0.000256549	0.00024274	0.000259569	0.000288444	0.000182761	0.000178685	0.00021493	0.00014617	0.000131541	0.000135791
Arginine and proline metabolism	0.00333631	0.00317064	0.00317459	0.0033717	0.00322832	0.00349214	0.00336339	0.00333767	0.00395821	0.00393348	0.00367457	0.00377144	0.00388905	0.00380024	0.00392462	0.00394569	0.00334231	0.00307252	0.00315133	0.00308204
Arginine biosynthesis	0.00523094	0.00512584	0.00510529	0.00517531	0.00472348	0.00474592	0.00480065	0.00482892	0.0054646	0.00502106	0.00487584	0.00495065	0.00551974	0.00539551	0.00561258	0.005582	0.0050673	0.00516519	0.00525075	0.00517016
Ascorbate and aldarate metabolism	0.000777125	0.000782201	0.000786847	0.000754519	0.000940219	0.00105987	0.000936034	0.000985844	0.00100204	0.00101868	0.000959105	0.000957402	0.000683589	0.000728587	0.000611752	0.00064709	0.000774148	0.000778707	0.000766816	0.000757699
Atrazine degradation	5.89155e-05	9.9547e-06	1.38476e-05	2.56527e-05	1.42726e-05	2.77474e-05	1.07458e-05	2.91352e-05	8.23651e-05	0.000107413	6.22531e-05	7.3988e-05	1.4586e-06	3.6942e-06	3.51088e-07	3.16136e-06	4.5681e-05	8.5972e-05	8.52497e-05	0.00012046
Bacterial chemotaxis	0.00638878	0.00553735	0.00539878	0.00522587	0.000499285	0.000576537	0.000550657	0.00188089	0.000978213	0.00118108	0.000841715	0.000945104	0.00131411	0.00202628	0.000878911	0.00113076	0.0043783	0.00533313	0.00677287	0.00555565
Bacterial invasion of epithelial cells	1.54016e-06	3.62406e-06	6.49689e-07	2.71558e-06	8.23019e-05	0.000201344	0.000139783	0.000100981	0.000187536	0.000572017	0.000100318	0.000191261	2.4036e-06	5.59069e-06	2.20406e-06	7.13731e-06	2.2168e-06	1.96602e-06	1.28381e-06	2.15066e-06
Bacterial secretion system	0.00511084	0.00513452	0.00515003	0.00517924	0.00491948	0.00522704	0.00510747	0.00515537	0.00632867	0.00736916	0.00586162	0.00618908	0.00562094	0.00561313	0.00581184	0.0059608	0.0056729	0.00582466	0.00604939	0.00602103
Basal transcription factors	7.08119e-08	1.37623e-07	1.57782e-07	1.20247e-07	0	0	1.76016e-08	0	7.62217e-08	7.43033e-08	3.81921e-08	0	2.46523e-07	4.93877e-07	5.85147e-08	1.74554e-07	9.96313e-08	0	0	6.90051e-08
Base excision repair	0.0039128	0.00393713	0.00386408	0.00388387	0.00349215	0.00344203	0.00358366	0.00356259	0.00414817	0.00472291	0.00415878	0.0042977	0.00428862	0.00431358	0.0043319	0.00437162	0.0043276	0.00432722	0.00425454	0.00436544
Benzoate degradation	0.00101921	0.000878573	0.000863121	0.000908255	0.000697914	0.000741561	0.000612922	0.000791191	0.0010895	0.00105384	0.00102956	0.000981225	0.000371634	0.000516062	0.000253739	0.000299185	0.00075934	0.000911306	0.000932698	0.000971258
Biofilm formation - Vibrio cholerae	0.000700294	0.000728592	0.00070365	0.000699937	0.000468974	0.000534981	0.000493839	0.000594481	0.00062953	0.000843967	0.000598151	0.000655206	0.000674776	0.000748421	0.000607851	0.000668812	0.000830676	0.000830902	0.000794788	0.00084039
Biosynthesis of amino acids	0.0430638	0.0413036	0.0412989	0.041502	0.0363879	0.0360784	0.0365636	0.0375724	0.0378503	0.0354344	0.0365499	0.0365441	0.0401372	0.040382	0.0402977	0.0407591	0.0410528	0.0414288	0.0419839	0.0413966
Biosynthesis of ansamycins	0.00122483	0.00107067	0.00103164	0.00101265	0.000658943	0.000689818	0.000632337	0.000796692	0.000489617	0.000519499	0.00046961	0.000486441	0.000549501	0.000656066	0.000522946	0.000605585	0.00104289	0.00104872	0.00112606	0.00105935
Biosynthesis of antibiotics	0.0561932	0.0561808	0.0566252	0.0565842	0.0555143	0.0554597	0.0561005	0.0555158	0.057572	0.0549581	0.0561367	0.056164	0.0584897	0.0575948	0.0599783	0.0600324	0.0578572	0.0571455	0.05697	0.0569775
Biosynthesis of secondary metabolites	0.077158	0.07605	0.0768454	0.0772126	0.0734652	0.0738803	0.0746077	0.0742244	0.0782656	0.0756373	0.0756358	0.0761279	0.0808034	0.0795528	0.0823632	0.0826745	0.0784125	0.0776241	0.0777937	0.0772978
Biosynthesis of siderophore group nonribosomal peptides	8.7497e-05	0.00011186	0.000137502	0.000148415	0.000328929	0.000438501	0.000370381	0.000332629	0.000430134	0.000485958	0.000381348	0.0004116	0.000327917	0.000285639	0.000364352	0.000376939	0.000178004	0.000126079	0.000119036	0.000122622
Biosynthesis of unsaturated fatty acids	0.00119311	0.00108275	0.00105149	0.00105502	0.000570208	0.000682379	0.000658933	0.000757605	0.00104508	0.00106918	0.000887367	0.000958688	0.000930277	0.00087033	0.00104693	0.00100182	0.00105062	0.00106335	0.0010783	0.00104659
Biosynthesis of vancomycin group antibiotics	0.000402893	0.000455852	0.000480008	0.000449022	0.00054419	0.000540706	0.000572307	0.000505144	0.00054282	0.00050498	0.000559972	0.000556826	0.000564046	0.000499487	0.000662562	0.000657641	0.000453011	0.000446971	0.000435174	0.000436986
Biotin metabolism	0.00325026	0.00356195	0.00361534	0.00366332	0.00394678	0.00411273	0.00397064	0.00397909	0.00392013	0.00353657	0.00370808	0.00371584	0.00452728	0.00441032	0.0043874	0.00424175	0.00359719	0.00345235	0.00350363	0.00345778
Bladder cancer	1.41624e-07	3.30294e-07	9.28127e-08	2.20453e-07	9.55414e-06	2.38161e-05	1.31396e-05	1.36018e-05	3.41778e-05	6.62191e-05	2.23551e-05	3.20032e-05	1.84893e-07	6.12407e-07	2.53564e-07	6.4003e-07	1.71864e-06	8.6251e-07	4.69083e-07	8.51063e-07
Butanoate metabolism	0.00545835	0.0054233	0.00529378	0.00539792	0.00555851	0.00558431	0.00541475	0.00562588	0.00557049	0.00587992	0.0054282	0.00542553	0.00475802	0.00507172	0.00442055	0.00452306	0.00570138	0.00568515	0.00557612	0.00570948
C5-Branched dibasic acid metabolism	0.00276302	0.00270539	0.00278003	0.00274384	0.00252417	0.00256648	0.00258319	0.00252046	0.00294902	0.00280669	0.00263356	0.00268066	0.00280258	0.00273736	0.00290383	0.00289034	0.00239189	0.00261015	0.00270178	0.00260041
Caprolactam degradation	1.60478e-05	7.11967e-06	1.51656e-05	2.41796e-05	2.29475e-05	5.87327e-05	3.08468e-05	3.55978e-05	9.49417e-05	0.000143093	6.5423e-05	8.00961e-05	3.57459e-06	7.40815e-06	1.07277e-06	2.92862e-06	4.20942e-06	5.51753e-06	2.64168e-06	3.87579e-06
Carbapenem biosynthesis	0.000779533	0.000752364	0.000770503	0.000779611	0.000646033	0.000645758	0.000660174	0.000666069	0.000749777	0.00066439	0.000669914	0.000675426	0.000843891	0.000835561	0.000858684	0.000871178	0.000739563	0.000793535	0.000795022	0.000805577
Carbohydrate digestion and absorption	3.8265e-05	9.93635e-05	9.8994e-05	9.13776e-05	0.000248943	0.000242581	0.00023983	0.000195285	0.000165584	0.00012954	0.000207281	0.000188241	1.54077e-06	2.01502e-06	1.54089e-06	3.68502e-06	9.36783e-05	7.31866e-05	4.41309e-05	7.53421e-05
Carbon fixation in photosynthetic organisms	0.00527836	0.00517316	0.00524547	0.00519298	0.0050379	0.00496973	0.00495173	0.00511205	0.00482713	0.00502862	0.00495841	0.00494475	0.00472624	0.00491269	0.00451671	0.00463721	0.00553351	0.00543576	0.00546834	0.00547864
Carbon fixation pathways in prokaryotes	0.00778524	0.00840767	0.00835071	0.0085028	0.0095214	0.00928135	0.00934965	0.00921188	0.00894832	0.00840262	0.00894165	0.00877142	0.00893495	0.00903935	0.00868622	0.00873131	0.00935558	0.00867144	0.0084356	0.00853674
Carbon metabolism	0.0250688	0.0255183	0.0254434	0.0254789	0.0260485	0.025876	0.0258321	0.0259992	0.0261431	0.0258841	0.0260047	0.0259375	0.0250682	0.0253847	0.0248086	0.0250433	0.0260393	0.0255415	0.0252865	0.0255984
Cardiac muscle contraction	1.37021e-05	7.10133e-06	1.68455e-05	2.22757e-05	3.71469e-06	1.37024e-06	2.209e-06	9.15984e-06	2.14335e-05	1.79814e-06	2.12093e-05	1.85816e-05	7.3957e-07	1.48163e-06	1.75544e-07	5.23661e-07	2.76851e-05	8.71389e-06	4.7328e-05	9.31569e-06
Carotenoid biosynthesis	8.63905e-06	2.4717e-05	3.55844e-05	3.13343e-05	1.80093e-05	5.56252e-05	5.86221e-05	2.64469e-05	0.000195158	0.00017708	0.000136638	0.000160409	0.000147688	9.14463e-05	0.000235522	0.000229422	1.53183e-05	3.7367e-05	2.61576e-05	4.23806e-05
Cationic antimicrobial peptide (CAMP) resistance	0.00236513	0.00262072	0.00265162	0.00270844	0.00397063	0.00417675	0.00394811	0.00369845	0.00409925	0.00432059	0.0039277	0.00395494	0.00329039	0.00317026	0.00323598	0.00306701	0.00268683	0.00256161	0.0024767	0.00255619
Cell cycle - Caulobacter	0.00479782	0.00485054	0.00486145	0.0048217	0.00454803	0.00438274	0.00451177	0.00454515	0.00418766	0.00427196	0.00451426	0.00443761	0.00446468	0.00456435	0.00432406	0.0043628	0.00505939	0.00502367	0.00499507	0.00503912
Central carbon metabolism in cancer	0.00259882	0.00254528	0.00259044	0.00255905	0.00280531	0.0027555	0.00277872	0.00266273	0.0025828	0.00296253	0.00297613	0.00298765	0.00274397	0.00262575	0.00298846	0.00295062	0.00222119	0.00240841	0.00234637	0.0024887
Chagas disease (American trypanosomiasis)	3.17768e-06	5.23883e-06	1.32629e-05	1.24155e-05	9.61276e-06	2.40363e-05	1.41517e-05	1.36018e-05	5.63278e-05	6.93101e-05	3.78229e-05	4.41111e-05	1.84893e-07	6.12407e-07	2.92574e-07	7.1761e-07	8.71774e-07	1.30645e-06	7.40658e-07	1.00057e-06
Chemical carcinogenesis	1.38083e-06	5.52325e-06	2.19038e-06	8.89827e-06	4.44443e-05	0.000114032	5.65363e-05	6.97803e-05	0.00017249	0.000304153	0.000106021	0.000150549	6.122e-06	1.54485e-05	1.75544e-06	1.01047e-05	3.87317e-06	6.1771e-06	1.0863e-06	3.80678e-06
Chloroalkane and chloroalkene degradation	0.000763158	0.000625862	0.000585945	0.000648782	0.000394343	0.000407508	0.000402935	0.000441488	0.000560397	0.000750894	0.000561347	0.00059617	0.000712596	0.000778014	0.00062837	0.000666737	0.00061815	0.000744879	0.000714747	0.000801046
Chlorocyclohexane and chlorobenzene degradation	8.76209e-05	7.41786e-05	6.65281e-05	6.29893e-05	3.61211e-05	5.30397e-05	3.31878e-05	6.03712e-05	0.000144105	0.000127088	0.000110146	0.000112573	2.01944e-05	3.8878e-05	1.60135e-05	3.21955e-05	4.29162e-05	9.68929e-05	7.4288e-05	0.000110799
Choline metabolism in cancer	6.32262e-05	9.70423e-05	8.68819e-05	0.000104986	0.000122812	0.000124635	0.000105609	0.000128104	0.000231211	0.000223059	0.000182736	0.000189893	0.000228959	0.000261636	0.000164895	0.000172517	0.000144079	0.000131444	0.000127615	0.000123692
Citrate cycle (TCA cycle)	0.00447528	0.00543768	0.00550896	0.00552407	0.00766439	0.00771583	0.0077265	0.00715634	0.00792007	0.00704843	0.00733918	0.00728673	0.00711738	0.00664869	0.00754994	0.00740405	0.00648257	0.00564341	0.00524825	0.00539357
Cocaine addiction	0	4.22043e-07	1.22513e-06	2.00412e-08	4.02974e-07	3.4256e-07	4.22438e-07	0	0	0	0	8.12608e-08	0	0	0	0	0	5.07359e-08	0	2.41518e-07
Colorectal cancer	7.61228e-06	7.26647e-06	1.87853e-05	1.96203e-05	1.29684e-06	6.76964e-07	1.77776e-06	4.84252e-06	2.14183e-05	1.35232e-06	1.49076e-05	1.04556e-05	2.46523e-07	4.93877e-07	9.75246e-08	2.52133e-07	1.0399e-05	5.84731e-06	1.67759e-05	5.72742e-06
Cyanoamino acid metabolism	0.00293489	0.00320415	0.00326607	0.00319824	0.00425729	0.003946	0.00397568	0.00380827	0.00288356	0.00237121	0.00309823	0.00283175	0.00285314	0.00307223	0.00227804	0.00224127	0.00289522	0.00278723	0.00273457	0.00270316
Cysteine and methionine metabolism	0.00977016	0.00953364	0.0093665	0.00954717	0.00865537	0.00867365	0.00870601	0.00894318	0.00878639	0.00852776	0.0087959	0.00879001	0.00939236	0.00953435	0.00936643	0.00949656	0.00960333	0.00961879	0.00967275	0.00978085
Cytokine-cytokine receptor interaction	0.000397689	0.000381985	0.000389711	0.000395021	0.00034096	0.000334143	0.000348062	0.000353263	0.00038216	0.00041482	0.000395937	0.000402322	0.000425376	0.000427006	0.00043139	0.000438479	0.000452139	0.000438904	0.000430162	0.000440494
D-Alanine metabolism	0.000897187	0.0009093	0.000876151	0.000888164	0.000745384	0.000771975	0.000795028	0.000792419	0.000963183	0.00127158	0.00102502	0.00109152	0.00101239	0.000986628	0.00110638	0.00112576	0.00098087	0.00102218	0.000992259	0.00106091
D-Arginine and D-ornithine metabolism	2.69262e-05	1.48908e-05	1.68733e-05	1.35979e-05	2.72557e-06	2.34083e-06	1.84817e-06	6.24898e-06	1.41467e-05	3.16681e-05	9.75171e-06	1.49791e-05	2.67067e-07	5.72897e-07	9.75246e-08	2.94802e-06	5.14347e-06	6.91277e-06	1.21962e-05	1.15584e-05
D-Glutamine and D-glutamate metabolism	0.00170375	0.0018354	0.00180811	0.00181743	0.00166644	0.00165239	0.00165568	0.00169155	0.00168041	0.00189291	0.0017998	0.00180604	0.0018156	0.00191071	0.00167381	0.00169851	0.00195474	0.0018999	0.00183692	0.0018945
DNA replication	0.00600305	0.00609766	0.0061381	0.00612892	0.00631103	0.00607455	0.00620724	0.00615458	0.00589698	0.00626173	0.00625536	0.00623509	0.00589105	0.00599928	0.00585857	0.00593923	0.00654562	0.00648071	0.00631547	0.00647262
Degradation of aromatic compounds	0.000623552	0.000748015	0.000696652	0.000690067	0.00100932	0.00108399	0.000932681	0.000983494	0.00126929	0.00136378	0.00126871	0.00123911	0.000726648	0.000799982	0.000639	0.0006487	0.000543314	0.000788081	0.000753249	0.00088629
Dioxin degradation	4.23898e-05	5.35444e-05	4.28145e-05	3.61943e-05	6.16916e-05	6.99883e-05	5.07806e-05	6.39764e-05	0.000142092	0.000217545	0.000148503	0.000155168	4.97156e-06	1.39076e-05	2.94524e-06	5.54693e-06	4.23682e-05	8.34859e-05	7.34609e-05	0.000113996
Dopaminergic synapse	0	4.22043e-07	1.22513e-06	2.00412e-08	4.02974e-07	3.4256e-07	4.22438e-07	0	0	0	0	8.12608e-08	0	0	0	0	0	5.07359e-08	0	2.41518e-07
Drug metabolism - cytochrome P450	0.000108555	0.000202461	0.000172288	0.000193086	0.000361409	0.000453085	0.000388643	0.000336858	0.000494587	0.000684705	0.000416243	0.00047241	0.000417385	0.000393798	0.000425656	0.000408378	0.000157069	0.000210059	0.000171981	0.000242955
Drug metabolism - other enzymes	0.00294599	0.00314917	0.00305396	0.00304224	0.00290562	0.0028223	0.00280163	0.00297086	0.00227575	0.00241441	0.00267765	0.00258841	0.0027541	0.00300109	0.00233677	0.00244366	0.00310628	0.0030006	0.00293115	0.00297563
Epithelial cell signaling in Helicobacter pylori infection	0.000854434	0.000789449	0.000756033	0.00080838	0.000715703	0.000727769	0.000736169	0.000750056	0.00084763	0.000788878	0.000750067	0.000768443	0.000875364	0.000865608	0.000875732	0.000872536	0.000902261	0.000845768	0.000875951	0.000863012
Estrogen signaling pathway	0.000421605	0.000444842	0.000443431	0.000451888	0.000518627	0.00049725	0.000507366	0.000478208	0.000409249	0.000317721	0.000420686	0.00039532	0.000421925	0.000414837	0.000430064	0.000432098	0.000424728	0.000387001	0.000401721	0.000384727
Ether lipid metabolism	4.10267e-05	5.79391e-05	6.88484e-05	8.3752e-05	3.17397e-05	3.96228e-05	3.86179e-05	4.41969e-05	0.000118662	0.000146348	9.88411e-05	0.000112045	0.000184461	0.000205156	0.000128381	0.000151261	0.00010196	7.92875e-05	8.71014e-05	7.84128e-05
Ethylbenzene degradation	6.00131e-06	7.23895e-06	1.57596e-05	1.74959e-05	1.94526e-05	4.91084e-05	2.78633e-05	2.92865e-05	9.05056e-05	0.000138724	6.09291e-05	7.61549e-05	1.47914e-06	3.43738e-06	7.80197e-07	2.07525e-06	1.11836e-05	1.28616e-05	9.92482e-06	3.48476e-06
Fatty acid biosynthesis	0.00508267	0.00499369	0.00495472	0.00506902	0.00493668	0.00480393	0.00477206	0.00493061	0.00495773	0.00431705	0.00474956	0.00459544	0.00435627	0.00453938	0.00399537	0.00381908	0.00531027	0.00510624	0.00490437	0.00506197
Fatty acid degradation	0.00153912	0.00144317	0.00148063	0.00159475	0.00165998	0.00170374	0.00163065	0.00162546	0.00184101	0.00199923	0.00175085	0.00176358	0.00161189	0.00171326	0.00139359	0.00140902	0.00158511	0.00155207	0.00143342	0.00154647
Fatty acid metabolism	0.0051589	0.00495236	0.00490725	0.00505719	0.00466156	0.00461893	0.00451217	0.00476546	0.00487709	0.00430386	0.00457149	0.00444292	0.0040119	0.00425904	0.00362077	0.00347112	0.00514231	0.00497729	0.00480996	0.00493997
Flagellar assembly	0.00624571	0.00558967	0.00568417	0.00553878	0.000580502	0.000821752	0.000722844	0.0019842	0.00150509	0.00253336	0.00114977	0.00149425	0.00158962	0.00238734	0.00103825	0.00123726	0.00502129	0.00560086	0.0071601	0.00570647
Fluorobenzoate degradation	3.5937e-06	6.67011e-06	1.40797e-05	1.81573e-05	2.26471e-05	6.48825e-05	2.79777e-05	4.50158e-05	0.000141955	9.66092e-05	7.65369e-05	7.9595e-05	2.62958e-06	5.64995e-06	6.82672e-07	3.14197e-06	1.96772e-06	2.77779e-06	1.07395e-06	2.03565e-06
Folate biosynthesis	0.00287194	0.00319379	0.00346872	0.00353389	0.00482386	0.00488166	0.00486246	0.00444792	0.00478326	0.00435703	0.00457086	0.00453114	0.00444798	0.00407595	0.00456191	0.00439645	0.00379833	0.0032885	0.00323184	0.0031345
FoxO signaling pathway	0.000196255	0.000264272	0.000241062	0.00026798	0.000380334	0.000447057	0.000464506	0.000376737	0.000621511	0.000587472	0.000512283	0.000566564	0.000749924	0.000619322	0.00092662	0.000873971	0.000380206	0.000280354	0.0002884	0.000250995
Fructose and mannose metabolism	0.00765247	0.00817597	0.00802351	0.00778784	0.00915263	0.00899253	0.00890577	0.008761	0.00717566	0.00756629	0.00860886	0.00831875	0.00707929	0.00709259	0.00697238	0.00674968	0.00689328	0.00727029	0.00733775	0.0072888
GABAergic synapse	0.00118274	0.00132123	0.00128384	0.00128553	0.00161791	0.00160353	0.00159232	0.00150458	0.00110674	0.00115154	0.00121323	0.00120434	0.00151671	0.00150879	0.00147379	0.00143687	0.00112708	0.00110248	0.00112185	0.00113063
Galactose metabolism	0.00907013	0.00958649	0.00949824	0.00925374	0.0125323	0.0121097	0.0121062	0.0111447	0.00774421	0.00760389	0.00933131	0.00891657	0.00957254	0.00924352	0.00954202	0.00888512	0.00686602	0.00734435	0.00746393	0.00750758
Geraniol degradation	7.74151e-05	0.000144311	0.000169847	0.000186914	0.000306465	0.000352478	0.000300221	0.000287872	0.000324841	0.000366375	0.000294155	0.00030122	0.000222693	0.000242691	0.000155318	0.000155314	0.000130716	0.000125419	0.000110469	9.73087e-05
Glucagon signaling pathway	0.00154993	0.00144374	0.00141803	0.00143763	0.00146284	0.00145493	0.00151314	0.00142568	0.00164718	0.00205351	0.00185366	0.00192113	0.00181351	0.0017358	0.00207084	0.00210444	0.00146698	0.00156969	0.00144088	0.00162085
Glutamatergic synapse	0.00110684	0.00117659	0.0011215	0.00112304	0.00115529	0.00114228	0.00113447	0.00114086	0.0008585	0.000874297	0.000977169	0.000953068	0.00115385	0.00119155	0.00108391	0.00106154	0.00101861	0.00101023	0.00103303	0.00104574
Glutathione metabolism	0.00131833	0.00143806	0.00150625	0.00152499	0.00200856	0.002131	0.00192085	0.00192226	0.00206154	0.00262475	0.0021143	0.00216812	0.0013029	0.00144518	0.00104016	0.00104199	0.00153834	0.0015205	0.00135759	0.00152514
Glycerolipid metabolism	0.00425242	0.00370082	0.00351135	0.00356514	0.00195096	0.00199805	0.00203155	0.00240905	0.0026371	0.00317124	0.00261532	0.00276915	0.00336478	0.00356674	0.00313557	0.00320027	0.00325784	0.00363714	0.00374408	0.00377583
Glycerophospholipid metabolism	0.00495727	0.00502789	0.00510576	0.00514271	0.00638375	0.00618571	0.00618027	0.00582157	0.00518516	0.00562883	0.00568303	0.00556211	0.00492677	0.00503282	0.00463604	0.00449782	0.00458735	0.00468546	0.00471957	0.00464661
Glycine, serine and threonine metabolism	0.00752097	0.00763807	0.0076417	0.00766867	0.00779509	0.00785501	0.00785618	0.00784944	0.00817241	0.00770253	0.00788595	0.00788318	0.00823801	0.0081387	0.00833398	0.00838048	0.00786577	0.00768644	0.0075272	0.00763454
Glycolysis / Gluconeogenesis	0.0101665	0.0108414	0.0106994	0.0105814	0.0110006	0.0107677	0.0108635	0.0108784	0.0105129	0.0111979	0.0116128	0.0115349	0.0112066	0.0112726	0.0110786	0.0111776	0.0113627	0.011256	0.0108275	0.0113061
Glycosaminoglycan degradation	0.00103147	0.00166877	0.00172822	0.00172455	0.00338976	0.00344283	0.00356954	0.00278664	0.00258257	0.00197963	0.00263945	0.00259018	0.00368427	0.00303493	0.00432562	0.00415005	0.00129179	0.00109297	0.00109725	0.00104082
Glycosphingolipid biosynthesis - ganglio series	0.000410904	0.000874885	0.000964695	0.000932154	0.00234786	0.00231883	0.00237153	0.00184746	0.00148385	0.000974666	0.00166198	0.00155033	0.0019538	0.00156994	0.00231338	0.00216371	0.000651576	0.000471831	0.000427397	0.000431316
Glycosphingolipid biosynthesis - globo and isoglobo series	0.00124305	0.00171466	0.00178941	0.00177951	0.00309903	0.00305521	0.00316335	0.00256392	0.00210535	0.00151564	0.00231275	0.00219209	0.00322757	0.00279898	0.00347611	0.00325935	0.00129609	0.0011369	0.00112333	0.00110686
Glyoxylate and dicarboxylate metabolism	0.00675281	0.00700805	0.00714647	0.00709892	0.00804435	0.00822317	0.00813867	0.00783957	0.00777615	0.00728831	0.00747038	0.00747162	0.00813303	0.00781497	0.00837482	0.00824978	0.00689419	0.00672442	0.00688234	0.00654189
HIF-1 signaling pathway	0.000904755	0.000895097	0.00093002	0.000922254	0.000933617	0.000941445	0.000990256	0.000937775	0.00115924	0.00119362	0.00117079	0.00119982	0.00116291	0.0010552	0.00134765	0.00135339	0.000986574	0.00103883	0.00100927	0.0010816
Hepatitis B	7.61228e-06	7.26647e-06	1.87853e-05	1.96203e-05	1.29684e-06	6.76964e-07	1.77776e-06	4.84252e-06	2.14183e-05	1.35232e-06	1.49076e-05	1.04556e-05	2.46523e-07	4.93877e-07	9.75246e-08	2.52133e-07	1.0399e-05	5.84731e-06	1.67759e-05	5.72742e-06
Herpes simplex virus 1 infection	7.61228e-06	7.26647e-06	1.87853e-05	1.96203e-05	1.29684e-06	6.76964e-07	1.77776e-06	4.84252e-06	2.14183e-05	1.35232e-06	1.49076e-05	1.04556e-05	2.46523e-07	4.93877e-07	9.75246e-08	2.52133e-07	1.0399e-05	5.84731e-06	1.67759e-05	5.72742e-06
Histidine metabolism	0.00439632	0.00443519	0.00446302	0.00452112	0.00460725	0.00444246	0.00447372	0.00441091	0.00452533	0.00355561	0.00421498	0.00403885	0.00432725	0.00436911	0.00424224	0.00422218	0.00427994	0.00419061	0.00423944	0.00405402
Homologous recombination	0.0086774	0.00871377	0.00873165	0.00874104	0.00849327	0.00829263	0.00839218	0.00850453	0.00822645	0.00886382	0.00863152	0.00866528	0.00847827	0.00867212	0.00833931	0.00850513	0.00953116	0.00940346	0.0092034	0.00939723
Huntington disease	0.00040716	0.000411996	0.000445761	0.00047252	0.000604263	0.000640767	0.000607915	0.000588811	0.000582364	0.000509691	0.000577477	0.000564844	0.000489	0.000475287	0.000474184	0.000437005	0.000449238	0.000367899	0.000406461	0.000343047
Influenza A	7.61228e-06	7.26647e-06	1.87853e-05	1.96203e-05	1.29684e-06	6.76964e-07	1.77776e-06	4.84252e-06	2.14183e-05	1.35232e-06	1.49076e-05	1.04556e-05	2.46523e-07	4.93877e-07	9.75246e-08	2.52133e-07	1.0399e-05	5.84731e-06	1.67759e-05	5.72742e-06
Inositol phosphate metabolism	0.00121004	0.00124894	0.0012639	0.00126045	0.00137336	0.00139955	0.00138865	0.00138022	0.00150648	0.00144194	0.00149154	0.00146511	0.00144356	0.00144562	0.00141452	0.00144486	0.00142085	0.00136983	0.00133069	0.00136301
Insulin resistance	0.00115674	0.00114237	0.0010897	0.00108794	0.000847271	0.000849842	0.000857619	0.000893738	0.000723496	0.000726181	0.000783306	0.000777246	0.000950019	0.000997217	0.000935163	0.0009474	0.00107607	0.00107788	0.00106577	0.00107676
Insulin signaling pathway	0.000979612	0.000919319	0.00089838	0.000885438	0.000972801	0.00095288	0.000991735	0.000900512	0.000866396	0.000665059	0.000925941	0.000873581	0.000822012	0.000751147	0.000978132	0.000960395	0.000719164	0.000777477	0.000816859	0.000779712
Isoquinoline alkaloid biosynthesis	0	9.17484e-09	0	0	2.58636e-06	8.0991e-06	2.83385e-06	5.32321e-06	3.78059e-06	6.91021e-06	1.10757e-06	1.43561e-06	0	0	0	0	0	0	0	0
Legionellosis	0.00131199	0.00120987	0.00125535	0.00126616	0.000701328	0.000694826	0.000721242	0.000827136	0.000855176	0.000956893	0.000858596	0.000887558	0.000980362	0.00104892	0.000943004	0.000976221	0.00123651	0.00127907	0.00144026	0.00131508
Limonene and pinene degradation	0.00026959	0.00018457	0.0001999	0.000243159	4.32208e-05	6.93602e-05	5.81292e-05	8.61594e-05	0.000157062	0.000224976	0.000120572	0.000142179	0.000221707	0.000254307	0.000148042	0.000173487	0.000248456	0.000224392	0.000247997	0.000216366
Linoleic acid metabolism	4.06726e-05	5.71592e-05	6.80595e-05	8.39824e-05	3.17397e-05	3.96228e-05	3.85299e-05	4.32266e-05	0.000118631	0.000145976	9.86501e-05	0.000112045	0.000180804	0.00019759	0.000126996	0.000148856	9.97559e-05	7.83997e-05	8.65459e-05	7.72052e-05
Lipoic acid metabolism	0.000247594	0.000443888	0.000445426	0.000406675	0.000856825	0.000890199	0.000889179	0.000750127	0.000871838	0.000719776	0.000796954	0.000796803	0.000735913	0.00057191	0.000917882	0.000842862	0.000410581	0.000381077	0.000319433	0.000344554
Lipopolysaccharide biosynthesis	0.00120134	0.00213442	0.00235044	0.00231603	0.00456673	0.00471192	0.00464141	0.00402661	0.00495936	0.00458674	0.00429917	0.00433513	0.0039772	0.00363383	0.00401444	0.00389782	0.00303042	0.00233489	0.00217946	0.0021579
Longevity regulating pathway	0.000157689	0.000227958	0.000222026	0.000238921	0.000370355	0.000415281	0.000421443	0.000355186	0.000534131	0.000501205	0.000449533	0.000483949	0.000589047	0.000497433	0.000677991	0.000627404	0.000274895	0.000216021	0.000228086	0.000191926
Longevity regulating pathway - multiple species	0.000736541	0.000706811	0.000705979	0.000737414	0.000719513	0.000774479	0.000784546	0.000751107	0.000950621	0.000907867	0.000835044	0.000879974	0.00101243	0.000918473	0.00110763	0.0010674	0.000781844	0.000760443	0.000805354	0.000747164
Longevity regulating pathway - worm	0.00164894	0.00164222	0.00162102	0.00162589	0.00140529	0.00146644	0.00145848	0.00149259	0.00169817	0.00189891	0.00163875	0.00171019	0.00172963	0.00173078	0.00173475	0.00175211	0.00172551	0.00172527	0.0017193	0.0017254
Lysine biosynthesis	0.00614432	0.00574091	0.00568798	0.00573633	0.00517761	0.00507782	0.00520412	0.00536535	0.00557613	0.00543003	0.00551167	0.00549709	0.00563809	0.00572334	0.00569261	0.00581231	0.00588938	0.0061125	0.00603101	0.00615552
Lysine degradation	0.00101561	0.00092864	0.000947339	0.00101537	0.000961811	0.0010678	0.00104432	0.000980592	0.00135024	0.00137363	0.00122342	0.00127183	0.00117343	0.0010502	0.00134783	0.00130657	0.000856169	0.000853847	0.000863916	0.000832685
Lysosome	0.00168658	0.00274396	0.00287393	0.00283397	0.00609219	0.00611177	0.0061171	0.00497168	0.0038309	0.00270882	0.0042065	0.00397202	0.00569543	0.00483899	0.00628924	0.00590779	0.00193325	0.00154888	0.00143222	0.00141101
MAPK signaling pathway - fly	0.000131321	0.000196663	0.000195881	0.000205322	0.000332556	0.000355398	0.000349286	0.000312876	0.000397252	0.000375484	0.000347586	0.000359931	0.000407914	0.000379693	0.0004176	0.000404014	0.00024721	0.00019546	0.000169808	0.000167717
MAPK signaling pathway - yeast	2.63686e-05	3.12954e-05	2.61453e-05	3.3599e-05	3.77989e-05	5.98827e-05	7.21577e-05	4.23097e-05	0.000136879	0.000125721	0.000101947	0.000124018	0.000181133	0.00011774	0.000260391	0.00022339	2.76851e-05	2.05607e-05	5.82774e-05	2.42093e-05
Meiosis - yeast	7.1166e-06	4.0461e-06	4.16729e-06	5.34097e-06	1.121e-06	1.46811e-07	1.00329e-06	6.3469e-06	5.18307e-07	0	1.55314e-06	5.95913e-07	6.57396e-07	1.22481e-06	2.14554e-07	1.18309e-06	4.6204e-06	1.32801e-05	1.71709e-05	1.59747e-05
Metabolic pathways	0.16492	0.167072	0.167563	0.167717	0.173206	0.17349	0.173607	0.171738	0.170733	0.167282	0.171135	0.170596	0.17435	0.172432	0.175289	0.174123	0.168525	0.165855	0.164756	0.16516
Metabolism of xenobiotics by cytochrome P450	0.000108555	0.000202039	0.000171063	0.000193066	0.000361006	0.000452742	0.00038822	0.000336858	0.000494587	0.000684705	0.000416243	0.000472329	0.000417385	0.000393798	0.000425656	0.000408378	0.000157069	0.000210009	0.000171981	0.000242714
Methane metabolism	0.00637152	0.00651057	0.00643104	0.00636852	0.00642634	0.00620521	0.0061849	0.00648763	0.00631856	0.00647081	0.0063813	0.00629694	0.00549365	0.00588632	0.00506671	0.00531268	0.00694783	0.00686485	0.00691196	0.00695636
MicroRNAs in cancer	0.000896638	0.000944935	0.0008843	0.00087657	0.00086295	0.000862656	0.000847789	0.000889216	0.00071249	0.000728767	0.000751887	0.000753803	0.000859915	0.000857983	0.000867227	0.000869258	0.000749688	0.000858363	0.000978508	0.000941402
Microbial metabolism in diverse environments	0.0379939	0.0387618	0.038353	0.0382921	0.0413218	0.0417491	0.0408936	0.0410186	0.0416858	0.0414422	0.0409818	0.0408341	0.0370902	0.0374707	0.0369848	0.0370751	0.0372822	0.0380089	0.0377688	0.0382727
Mineral absorption	5.22238e-07	1.55972e-06	1.82841e-06	1.29265e-06	9.52484e-07	7.34057e-07	5.20127e-06	1.00945e-05	6.58555e-06	6.36036e-06	1.6308e-05	1.63063e-05	1.02718e-06	2.68669e-06	5.85147e-08	2.34678e-06	2.65642e-05	2.65602e-05	2.47256e-05	2.82346e-05
Mismatch repair	0.00775125	0.00761207	0.00761047	0.00761309	0.00776925	0.00747069	0.00763952	0.00755934	0.00695192	0.00743341	0.00743885	0.0074056	0.00702308	0.00715509	0.007053	0.00718585	0.00788993	0.00791813	0.00782783	0.00799844
Monobactam biosynthesis	0.00229319	0.00232967	0.00232008	0.00229804	0.00262594	0.00262348	0.00259359	0.00259044	0.00232769	0.00195722	0.00233649	0.00225511	0.00220312	0.00219953	0.00221765	0.00221088	0.00222773	0.0022401	0.002244	0.00222752
N-Glycan biosynthesis	0.000342986	0.000416996	0.000444489	0.000403929	0.000291123	0.000267474	0.000279689	0.000316037	0.000237187	0.000166707	0.000271138	0.000248414	0.000402737	0.000444944	0.00028682	0.000320229	0.000442712	0.000468166	0.000529484	0.000492881
NOD-like receptor signaling pathway	0.000421605	0.000444842	0.000443431	0.000451888	0.000520283	0.000497577	0.000507894	0.000479329	0.000414478	0.000318642	0.000425638	0.000400196	0.000421925	0.000414837	0.000430064	0.000432098	0.000424728	0.000387255	0.000401721	0.000384727
Naphthalene degradation	0.00031868	0.00035936	0.000312407	0.000327272	0.000354141	0.00038631	0.000366544	0.000345385	0.000445881	0.000634223	0.000451417	0.000486522	0.000471538	0.000482557	0.000460882	0.000449844	0.000239128	0.000383792	0.000349603	0.000447935
Neomycin, kanamycin and gentamicin biosynthesis	0.000718475	0.000801193	0.000782411	0.000767506	0.000967958	0.00089024	0.000936677	0.000847619	0.000752445	0.000546843	0.000878188	0.000813489	0.000877952	0.000857153	0.000889873	0.000860434	0.000566553	0.000587458	0.000572837	0.000593547
Nicotinate and nicotinamide metabolism	0.00445241	0.00445786	0.00455277	0.00464437	0.00477392	0.00476352	0.0047406	0.0047337	0.00470295	0.00491721	0.00487138	0.00486694	0.00469109	0.00478298	0.00447653	0.00449276	0.00513235	0.00472895	0.00457006	0.00463065
Nitrogen metabolism	0.00346345	0.00346697	0.00344705	0.00345662	0.00398788	0.00398945	0.00384686	0.00388569	0.00367091	0.00341657	0.00343147	0.00336209	0.00289305	0.00308584	0.00256745	0.00260993	0.00344093	0.00333814	0.00337773	0.0033082
Nitrotoluene degradation	0.000424376	0.000440814	0.000428006	0.000422037	0.000362574	0.000429513	0.000467322	0.000463235	0.00112651	0.00115693	0.000742059	0.000843718	0.00084839	0.000795853	0.000998847	0.00113491	0.000925812	0.000780407	0.000718302	0.000688096
Non-alcoholic fatty liver disease (NAFLD)	2.13144e-05	1.43678e-05	3.56308e-05	4.1896e-05	5.01153e-06	2.0472e-06	3.98676e-06	1.40558e-05	4.28518e-05	3.15046e-06	3.70208e-05	2.94841e-05	1.31479e-06	2.21257e-06	4.87623e-07	8.72769e-07	3.80841e-05	1.45612e-05	6.41039e-05	1.50431e-05
Non-homologous end-joining	1.49413e-05	2.70566e-05	3.55658e-05	3.03523e-05	0.000185038	0.00015761	0.000161266	0.000123395	4.38579e-05	2.45201e-06	7.97959e-05	5.22507e-05	3.55405e-06	9.95656e-06	2.92574e-06	6.26454e-06	2.72741e-06	4.2745e-06	5.33274e-06	3.46176e-06
Nonribosomal peptide structures	0.000140252	7.22243e-05	5.82121e-05	7.2058e-05	4.7822e-05	2.74374e-05	3.83538e-05	5.69975e-05	0.000114439	0.000175594	0.000123602	0.000124261	1.28808e-05	3.63493e-05	7.19731e-06	2.29829e-05	7.51718e-05	0.000124468	0.00012801	0.000141506
Novobiocin biosynthesis	0.00127236	0.00128202	0.00132623	0.00133978	0.0014688	0.00144629	0.00145851	0.00141202	0.00133873	0.00112115	0.00127397	0.0012363	0.00129497	0.00126097	0.00130788	0.00129185	0.00138062	0.00127066	0.00127783	0.00124524
Nucleotide excision repair	0.00374066	0.00355481	0.00355187	0.0036037	0.00341343	0.00328344	0.00343896	0.0033682	0.00340635	0.00364847	0.00350722	0.00355578	0.00363766	0.00362316	0.00374767	0.00378935	0.00389093	0.00382615	0.00375658	0.00386138
One carbon pool by folate	0.00807829	0.0077742	0.00776934	0.00783666	0.00674052	0.00660001	0.00674544	0.0069294	0.00627938	0.00633222	0.00676302	0.0066902	0.00762571	0.0077887	0.00747481	0.0075287	0.00805299	0.00799113	0.00797157	0.00806259
Other glycan degradation	0.00300305	0.00405296	0.00418998	0.00406106	0.00792408	0.00787529	0.00779318	0.00665511	0.00450045	0.00317688	0.00525133	0.00486488	0.00650343	0.00565463	0.00699561	0.00640129	0.00266774	0.00238427	0.00229305	0.00223214
Oxidative phosphorylation	0.00804237	0.00880518	0.00917035	0.00916902	0.0106539	0.0108239	0.0108843	0.0102108	0.0108435	0.010274	0.0105635	0.0105844	0.0110358	0.0104134	0.0115919	0.0114193	0.00959032	0.00872006	0.00842419	0.00839674
PI3K-Akt signaling pathway	0.000460171	0.000481156	0.000462467	0.000480948	0.000528606	0.000529027	0.000550428	0.000499759	0.00049663	0.000403987	0.000483435	0.000477936	0.000582802	0.000536726	0.000678693	0.000678665	0.000530039	0.000451334	0.000462035	0.000443795
PPAR signaling pathway	0.000967786	0.00104945	0.00109203	0.00110766	0.00167033	0.00159334	0.00158642	0.00151539	0.00162001	0.00135155	0.00150845	0.00143959	0.00128036	0.00129139	0.00117223	0.00115376	0.00143099	0.00121269	0.0010304	0.00111778
Pantothenate and CoA biosynthesis	0.00554359	0.00537425	0.00546564	0.00548574	0.00448425	0.00464853	0.00472002	0.00480274	0.00543416	0.00537189	0.00515855	0.00530032	0.00594904	0.00569896	0.00626574	0.00622302	0.00542104	0.00551522	0.00560437	0.00548541
Parkinson disease	2.13144e-05	1.43678e-05	3.56308e-05	4.1896e-05	6.35966e-06	4.42881e-06	5.32448e-06	1.59162e-05	4.28518e-05	3.15046e-06	3.70208e-05	2.94841e-05	1.31479e-06	2.21257e-06	4.87623e-07	8.72769e-07	3.80841e-05	1.45612e-05	6.41039e-05	1.50431e-05
Pathogenic Escherichia coli infection	9.73664e-08	2.47721e-07	3.71251e-08	1.8037e-07	5.16539e-06	1.31233e-05	9.18803e-06	6.56054e-06	1.00917e-05	3.27232e-05	5.37235e-06	1.04556e-05	1.64349e-07	3.55591e-07	1.36534e-07	4.84872e-07	1.49447e-07	1.2684e-07	8.64101e-08	1.49511e-07
Pathways in cancer	0.000442592	0.000470651	0.000486004	0.000498003	0.000617979	0.000574824	0.000591413	0.000553195	0.000693449	0.000619199	0.000653543	0.000626426	0.000431478	0.00043074	0.000436247	0.000441679	0.000501494	0.000462788	0.000449345	0.000440379
Penicillin and cephalosporin biosynthesis	1.94733e-07	1.57807e-06	5.47595e-07	2.40494e-07	1.43605e-06	3.97206e-06	3.00987e-06	2.70611e-06	1.41772e-05	2.07603e-05	1.13176e-05	1.21485e-05	3.12263e-06	7.90203e-06	1.17029e-06	6.22575e-06	8.35658e-06	2.66617e-05	1.57266e-05	3.73088e-05
Pentose and glucuronate interconversions	0.0050377	0.00513957	0.00516435	0.00499639	0.00595307	0.00589883	0.00566748	0.00561998	0.00369552	0.00294574	0.00414507	0.00380592	0.00400607	0.00422405	0.00347689	0.00333118	0.00342435	0.00368844	0.00365776	0.00362827
Pentose phosphate pathway	0.00916358	0.00883	0.00872248	0.00849251	0.00747204	0.0073291	0.00720632	0.00775524	0.00642643	0.00704834	0.00712218	0.00703105	0.00640928	0.00699359	0.00582772	0.00602973	0.00779118	0.00825925	0.00832966	0.00842634
Peptidoglycan biosynthesis	0.0067804	0.00664806	0.00658466	0.00662749	0.00567227	0.00558476	0.0057572	0.00594022	0.00626079	0.00673195	0.00653987	0.00657412	0.00643929	0.00666283	0.00637816	0.0065275	0.00747332	0.0074414	0.00731143	0.00748668
Peroxisome	0.00145927	0.00146125	0.00152973	0.0015489	0.00212122	0.00208556	0.00205511	0.00196533	0.00184728	0.00158765	0.00181853	0.0017542	0.00159534	0.00153418	0.00151863	0.00140068	0.00154563	0.00139916	0.00135991	0.00132431
Pertussis	0.000141332	0.000291044	0.000311915	0.00032157	0.00070039	0.000863537	0.000678312	0.000684469	0.00085292	0.0010347	0.000778405	0.000818486	0.000435484	0.000467741	0.000310089	0.000307952	0.000297325	0.000231267	0.000210347	0.000217102
Phenylalanine metabolism	0.0015734	0.00169648	0.00168339	0.00172281	0.00220737	0.00227754	0.00208397	0.00214336	0.00191329	0.00160733	0.00189154	0.00176482	0.00133127	0.00139767	0.00120566	0.00113553	0.00155344	0.00153143	0.00151015	0.00153681
Phenylalanine, tyrosine and tryptophan biosynthesis	0.0086586	0.00821727	0.00846479	0.00848888	0.00717399	0.00725427	0.00740705	0.0074699	0.00760579	0.00672387	0.00705808	0.00713333	0.0088702	0.00853971	0.00914133	0.0091002	0.00869583	0.00834988	0.0085424	0.00818533
Phenylpropanoid biosynthesis	0.00168684	0.00190894	0.00196258	0.00187977	0.00241814	0.00224911	0.00226343	0.00217279	0.00125664	0.000770481	0.00155654	0.00135364	0.00183031	0.00191464	0.0014277	0.00136323	0.00141882	0.00138319	0.00141035	0.00132444
Phosphatidylinositol signaling system	0.000671377	0.000717537	0.000728802	0.000742194	0.00103683	0.00101602	0.00101237	0.000948484	0.00117866	0.00114378	0.0010329	0.0010366	0.00102572	0.00102944	0.000992234	0.00100892	0.000833017	0.000833147	0.000770383	0.000808337
Phospholipase D signaling pathway	5.74993e-05	8.7895e-05	7.90021e-05	9.6929e-05	0.00011336	0.000120369	0.000100628	0.000121642	0.000200936	0.00021331	0.000146174	0.000157294	0.000228815	0.000261636	0.000164895	0.00017242	0.00014261	0.000129503	0.000125702	0.000121622
Phosphonate and phosphinate metabolism	0.00050018	0.000574235	0.000567754	0.000616967	0.000617026	0.000766918	0.000692385	0.000695462	0.00092402	0.000956016	0.000785687	0.000847144	0.00115389	0.00113815	0.00107862	0.00111173	0.000694841	0.000667482	0.000653655	0.000732708
Phosphotransferase system (PTS)	0.00187049	0.00194989	0.00164197	0.00139915	0.0012485	0.00137934	0.00106949	0.00159472	0.00278797	0.00567263	0.00355185	0.00388499	0.000423486	0.000671357	0.00042195	0.000523836	0.00130595	0.00246204	0.00205041	0.00241735
Photosynthesis	0.00321935	0.00313289	0.00325873	0.00321555	0.00272141	0.00269003	0.00279874	0.00282857	0.0030698	0.00331675	0.00316491	0.00321759	0.00335872	0.00331528	0.0033795	0.00346435	0.00361911	0.00354204	0.00346421	0.00349358
Photosynthesis - antenna proteins	0	5.39481e-06	0	0	0	1.07662e-06	1.37292e-06	0	5.12209e-06	0	1.83322e-06	1.78774e-06	3.94437e-06	1.1853e-05	0	1.30333e-05	0	0	1.18505e-06	2.20816e-06
Plant hormone signal transduction	7.52731e-05	5.83611e-05	5.80822e-05	4.71067e-05	1.39209e-07	2.44686e-08	1.25851e-06	1.23199e-05	9.75637e-07	8.61918e-07	4.20113e-07	9.48043e-07	0	0	0	1.55159e-07	4.03507e-05	7.18167e-05	9.6409e-05	8.23921e-05
Plant-pathogen interaction	0.00186732	0.00189599	0.00192209	0.00192312	0.00181066	0.00177849	0.00171833	0.0018214	0.00165639	0.00148938	0.0016685	0.00159706	0.00147261	0.00160348	0.00129238	0.00133421	0.0017947	0.00180879	0.00194409	0.00181756
Platinum drug resistance	8.8869e-06	1.21016e-05	2.07622e-05	2.67048e-05	4.03926e-05	0.000101887	5.34208e-05	6.62998e-05	0.000162748	0.000265203	0.000100203	0.00013446	5.52623e-06	1.37693e-05	1.69693e-06	8.94103e-06	1.36619e-05	1.06292e-05	1.77141e-05	8.91316e-06
Polycyclic aromatic hydrocarbon degradation	2.12436e-07	4.31217e-07	4.73345e-07	3.60741e-07	2.12477e-06	1.06928e-05	9.24083e-07	8.4566e-06	3.47876e-05	5.94426e-06	1.70082e-05	1.56563e-05	7.3957e-07	1.48163e-06	1.75544e-07	5.23661e-07	2.98894e-07	0	0	2.07015e-07
Polyketide sugar unit biosynthesis	0.00171319	0.0019677	0.00200191	0.00190897	0.00236238	0.00225556	0.00235006	0.00210328	0.00182078	0.00167601	0.00202312	0.00191876	0.00187257	0.00183305	0.0018453	0.0017248	0.00168562	0.00162458	0.00162737	0.00159075
Porphyrin and chlorophyll metabolism	0.00799843	0.00649017	0.00637082	0.00637513	0.0036331	0.00385598	0.00378094	0.00459211	0.00482837	0.00411025	0.00426878	0.00431198	0.00453391	0.00463681	0.00470503	0.00473766	0.00665885	0.00648619	0.00648261	0.00624626
Primary immunodeficiency	0.000501711	0.000481927	0.000484352	0.000495598	0.000410169	0.000377142	0.000386557	0.000414703	0.000510075	0.000636764	0.000517019	0.000525378	0.000448118	0.000517899	0.000312157	0.000348118	0.000544224	0.000527793	0.000493624	0.000510074
Prion diseases	0.000172994	9.19778e-05	8.93136e-05	9.64781e-05	1.54595e-05	2.56267e-05	1.74256e-05	4.03068e-05	4.11902e-05	7.57596e-05	3.49712e-05	4.47341e-05	8.83376e-07	2.31134e-06	3.31584e-07	2.28859e-06	4.87695e-05	9.0107e-05	0.000127529	0.000101702
Progesterone-mediated oocyte maturation	0.000421605	0.000444842	0.000443431	0.000451888	0.000518627	0.00049725	0.000507366	0.000478208	0.000409249	0.000317721	0.000420686	0.00039532	0.000421925	0.000414837	0.000430064	0.000432098	0.000424728	0.000387001	0.000401721	0.000384727
Prolactin signaling pathway	0.000287532	0.000212544	0.000201218	0.000204279	2.89115e-05	2.79594e-05	2.7256e-05	7.18366e-05	6.06115e-05	0.000180572	9.6766e-05	0.000111842	6.2391e-05	0.000106006	4.13114e-05	6.07641e-05	0.000180395	0.000218	0.000231567	0.00023502
Propanoate metabolism	0.00548252	0.00522386	0.00519737	0.00530641	0.00609777	0.00600108	0.00588962	0.00577601	0.00549514	0.00513874	0.00562013	0.00543965	0.00435806	0.00443903	0.0043764	0.00430112	0.00479512	0.00489475	0.00484926	0.00488985
Prostate cancer	0.00042288	0.000449677	0.000445408	0.000458972	0.000557723	0.00059846	0.000559009	0.000539665	0.000550579	0.000581572	0.000505981	0.000519324	0.000427205	0.000428112	0.000431663	0.000440787	0.000427991	0.000391783	0.000402659	0.000387912
Proteasome	0.00036261	0.000278823	0.000259894	0.000258982	6.89598e-05	8.61375e-05	9.87537e-05	0.000137469	0.000248925	0.000277746	0.000176715	0.000211942	0.000203546	0.00018147	0.000275507	0.000280993	0.000281259	0.000318647	0.000332617	0.000310281
Protein digestion and absorption	0.000108369	0.000261079	0.000263421	0.00025821	0.00057097	0.000552035	0.000514459	0.000494444	0.000274428	0.000108676	0.000370654	0.000306543	0.000252317	0.000261735	0.000180186	0.000152463	0.000270374	0.000169356	0.000135442	0.00015372
Protein export	0.00551999	0.00539654	0.00548171	0.00550753	0.00510915	0.00504699	0.00515423	0.00518121	0.00553889	0.00601386	0.00564172	0.00573318	0.00587778	0.00591805	0.00586641	0.00589532	0.0059914	0.00594966	0.00583948	0.00597151
Protein processing in endoplasmic reticulum	0.000603256	0.000708169	0.000726918	0.000753678	0.000997851	0.000917824	0.000941764	0.000871386	0.000709883	0.000591231	0.000821626	0.000754087	0.000842412	0.000904526	0.000729191	0.0007692	0.000845982	0.000733197	0.000705835	0.00072598
Proteoglycans in cancer	0.000385093	0.000359672	0.000358248	0.000368226	0.000159636	0.000180456	0.000190247	0.000233402	0.000382602	0.00041482	0.00039609	0.000402471	0.000425027	0.000427322	0.000430493	0.000438867	0.000452351	0.000439094	0.00043047	0.000440828
Proximal tubule bicarbonate reclamation	0.000120664	0.000225875	0.000210945	0.000210502	0.000310913	0.000364353	0.000359424	0.000288717	0.000387221	0.000447826	0.000384085	0.000418046	0.00056269	0.000483189	0.000664883	0.000631982	0.000238331	0.000188623	0.000167413	0.000174985
Purine metabolism	0.0202224	0.0198762	0.0198116	0.0197637	0.0190575	0.0188878	0.0190075	0.0193611	0.0189756	0.0207128	0.0195026	0.0197543	0.0189341	0.0192902	0.01874	0.0190057	0.0208539	0.0209936	0.0204668	0.0210403
Pyrimidine metabolism	0.016515	0.0161988	0.016168	0.0162647	0.0152831	0.0149766	0.0151958	0.0155779	0.015069	0.0169311	0.0159133	0.0160946	0.0156891	0.0162071	0.0152608	0.015606	0.0177655	0.0175054	0.0170369	0.0174921
Pyruvate metabolism	0.0100298	0.00992151	0.00966057	0.00983582	0.00967451	0.00971116	0.00958124	0.00986198	0.0103825	0.0108056	0.0101906	0.0102613	0.00951962	0.00975962	0.0093464	0.00943019	0.0104928	0.0103618	0.0100791	0.010383
Quorum sensing	0.0150019	0.0136173	0.0131675	0.0129682	0.0104084	0.010324	0.0102756	0.0115596	0.0104573	0.0121541	0.0106997	0.0109339	0.0104138	0.0111772	0.0100426	0.0104027	0.012638	0.0138374	0.0138809	0.0141013
RIG-I-like receptor signaling pathway	4.42574e-08	3.85343e-07	0	8.31708e-07	1.6412e-06	4.84478e-06	1.0737e-06	3.81882e-06	8.12523e-06	9.49596e-06	1.26161e-05	1.09838e-05	1.58186e-06	7.2106e-06	1.1898e-06	8.3204e-06	6.76248e-06	2.59641e-05	1.5381e-05	3.65267e-05
RNA degradation	0.0058533	0.00587119	0.00591852	0.00591043	0.00589757	0.00585993	0.00603445	0.00581038	0.00616022	0.00610837	0.00621506	0.00625593	0.00659966	0.00632459	0.00702483	0.00697622	0.00608852	0.00603535	0.00602683	0.00609699
RNA polymerase	0.00156013	0.00150282	0.00149774	0.00151443	0.00147991	0.00141745	0.00147954	0.00143863	0.00144053	0.00167775	0.00152898	0.00156372	0.00148738	0.00148453	0.0015751	0.0016025	0.00160967	0.00163679	0.00160545	0.00167119
RNA transport	0.00123828	0.00109456	0.00107783	0.00107512	0.000702442	0.000658384	0.000653247	0.000794039	0.000680644	0.000888222	0.000761422	0.000762213	0.00060955	0.000757548	0.000424719	0.000466272	0.000966386	0.00112723	0.00117849	0.00120603
Renal cell carcinoma	1.33746e-05	1.85423e-05	2.37879e-05	2.64944e-05	9.80545e-05	7.68966e-05	8.22698e-05	7.01453e-05	0.000262782	0.000300126	0.000217949	0.00022065	9.30626e-06	1.5409e-05	6.08553e-06	9.32893e-06	6.63669e-05	6.99395e-05	3.08484e-05	4.99252e-05
Renin-angiotensin system	3.17591e-05	9.29228e-05	8.27518e-05	7.58257e-05	0.000191215	0.000171288	0.000173393	0.000141911	4.53519e-05	3.01671e-06	9.32268e-05	6.7135e-05	3.59924e-05	3.35244e-05	2.61366e-05	2.75407e-06	3.50329e-05	2.75623e-05	1.87633e-05	2.21966e-05
Retinol metabolism	0.00010728	0.000197204	0.000169086	0.000185982	0.00032191	0.000351532	0.000336577	0.0002754	0.000353257	0.000420854	0.000330947	0.000348325	0.000412105	0.000380522	0.000424056	0.000399689	0.000153806	0.000205227	0.000171043	0.000239528
Riboflavin metabolism	0.00150018	0.00156029	0.00167866	0.0016986	0.00189834	0.00194117	0.00193741	0.00185969	0.0019778	0.00184595	0.00186039	0.00186886	0.00205087	0.00193159	0.00209705	0.00208834	0.00194315	0.00163193	0.00156791	0.00153429
Ribosome	0.0219469	0.0211103	0.0215087	0.0218281	0.0186737	0.0183209	0.019063	0.0194016	0.0211079	0.0231593	0.0219003	0.0222897	0.0234196	0.0236175	0.0236054	0.0240189	0.0251571	0.0243079	0.0238198	0.024343
Ribosome biogenesis in eukaryotes	0.000385527	0.000360241	0.000358507	0.000369489	0.000203055	0.000226905	0.000232385	0.000265867	0.000501218	0.000548849	0.000465179	0.000480658	0.000425725	0.000428903	0.000430981	0.000439953	0.000478467	0.000462483	0.000439013	0.000457791
Salivary secretion	1.50298e-05	5.02414e-05	3.85822e-05	3.86393e-05	5.11923e-05	7.58363e-05	6.37969e-05	6.1484e-05	9.4896e-05	0.000118425	0.000101769	0.000110582	6.36852e-07	1.1853e-06	5.26633e-07	2.71528e-06	9.01913e-05	7.01551e-05	4.22545e-05	7.22254e-05
Salmonella infection	0.000557405	0.000545967	0.000575392	0.000566754	0.000536343	0.000586642	0.000529403	0.000528662	0.000546281	0.000790052	0.000492958	0.000540046	0.000169444	0.000234552	0.000110027	0.000109193	0.000440395	0.000464348	0.000613623	0.000488096
Secondary bile acid biosynthesis	0.000306111	0.000332927	0.000358461	0.00037003	0.000678864	0.000581528	0.00060501	0.000538143	0.000353211	0.000434035	0.000503702	0.000463837	0.000410503	0.000462387	0.000288575	0.000317843	0.000274123	0.000317302	0.000311015	0.000322576
Selenocompound metabolism	0.00282548	0.0028587	0.00284599	0.00279688	0.00259452	0.00268766	0.00264303	0.00272424	0.00285522	0.0030384	0.00292116	0.00297142	0.00280521	0.00277201	0.0028974	0.00289911	0.00267819	0.00281939	0.00279445	0.00280526
Serotonergic synapse	0	4.22043e-07	1.22513e-06	2.00412e-08	4.02974e-07	3.4256e-07	4.22438e-07	0	0	0	0	8.12608e-08	0	0	0	0	0	5.07359e-08	0	2.41518e-07
Sesquiterpenoid and triterpenoid biosynthesis	6.19604e-07	1.61477e-06	5.19751e-07	6.81399e-07	1.8698e-05	6.36835e-05	8.48924e-05	2.38743e-05	0.000174731	0.000167688	0.000122087	0.000162034	0.000290651	0.000169143	0.000469483	0.000446896	1.29521e-06	8.87878e-07	8.07317e-06	9.89073e-07
Shigellosis	1.29232e-06	3.04605e-06	5.01188e-07	2.28469e-06	6.7282e-05	0.000166093	0.000115581	8.35334e-05	0.000157398	0.000472926	8.36024e-05	0.000159149	2.03382e-06	4.54367e-06	1.75544e-06	5.93483e-06	1.79336e-06	1.63623e-06	1.06161e-06	1.79413e-06
Small cell lung cancer	7.61228e-06	7.26647e-06	1.87853e-05	1.96203e-05	1.29684e-06	6.76964e-07	1.77776e-06	4.84252e-06	2.14183e-05	1.35232e-06	1.49076e-05	1.04556e-05	2.46523e-07	4.93877e-07	9.75246e-08	2.52133e-07	1.0399e-05	5.84731e-06	1.67759e-05	5.72742e-06
Sphingolipid metabolism	0.0026459	0.00312005	0.00314106	0.0031235	0.00467545	0.00463086	0.00470931	0.00404807	0.00305897	0.00241249	0.0034457	0.00328462	0.00490399	0.00440811	0.00505661	0.00464152	0.00208465	0.00200871	0.00208767	0.00197975
Staphylococcus aureus infection	1.64903e-05	3.56351e-05	2.41034e-05	1.8017e-05	4.13305e-05	6.10899e-06	2.50471e-05	2.63757e-05	6.68007e-05	0.000396155	0.000227561	0.00024683	1.75648e-05	5.12447e-05	1.00645e-05	2.1315e-05	6.28051e-05	0.000172654	0.000106865	0.000219333
Starch and sucrose metabolism	0.0110016	0.0113109	0.0111072	0.0107585	0.0126213	0.012184	0.0122521	0.0117433	0.00875903	0.0078759	0.0101399	0.00958373	0.00968399	0.00965879	0.0093662	0.00895389	0.00879891	0.0094432	0.00962799	0.00966231
Steroid biosynthesis	3.09802e-07	8.07386e-07	2.59875e-07	3.407e-07	9.34899e-06	3.18418e-05	4.24462e-05	1.19372e-05	8.73653e-05	8.38438e-05	6.10436e-05	8.1017e-05	0.000145326	8.45715e-05	0.000234742	0.000223448	6.47604e-07	4.43939e-07	4.03659e-06	4.94537e-07
Steroid hormone biosynthesis	6.6395e-05	0.000142733	0.000139915	0.000145629	0.00025128	0.000243373	0.000234119	0.000212181	9.92863e-05	7.32482e-05	0.00012429	0.000107088	0.000215893	0.000229317	0.000153192	0.000150776	0.000103305	8.73292e-05	8.06577e-05	8.12995e-05
Streptomycin biosynthesis	0.00316979	0.00359354	0.0036054	0.00348844	0.00426907	0.00409145	0.00424166	0.00386226	0.0034761	0.00304187	0.00384275	0.00364001	0.00376889	0.00370589	0.00372152	0.00358708	0.00300656	0.00298438	0.00292225	0.00294854
Styrene degradation	9.17368e-05	9.84827e-05	9.40935e-05	8.87222e-05	4.32428e-05	4.59601e-05	3.9806e-05	7.04925e-05	0.000150065	0.000105823	9.31377e-05	8.75856e-05	1.64143e-05	3.32873e-05	1.29708e-05	2.76959e-05	7.79117e-05	0.000101852	9.14713e-05	0.000107533
Sulfur metabolism	0.0025013	0.00306238	0.00312241	0.00305603	0.00523034	0.00528159	0.00507346	0.00457763	0.00447589	0.00459989	0.0043185	0.00431563	0.0030435	0.00294803	0.00307813	0.0028677	0.00259005	0.00261204	0.00256433	0.00259931
Sulfur relay system	0.00274151	0.00237429	0.00241934	0.00248591	0.00194534	0.00206187	0.00200695	0.00213266	0.00267146	0.00320079	0.00230628	0.00246373	0.0021086	0.00220123	0.0021273	0.00220137	0.0024322	0.00255925	0.00265298	0.00258643
Synthesis and degradation of ketone bodies	0.000367301	0.000243684	0.000257137	0.000289534	3.09923e-05	3.05449e-05	2.45982e-05	9.02275e-05	0.000148312	0.000236552	0.000211979	0.000206687	6.50616e-05	0.000118214	4.12139e-05	5.9678e-05	0.000253275	0.000294065	0.000296559	0.000305152
Taurine and hypotaurine metabolism	0.00118713	0.00123638	0.00123407	0.00124512	0.00141241	0.00138296	0.00136806	0.00134798	0.00112616	0.00131075	0.00125297	0.00125553	0.00132414	0.0013709	0.00119501	0.00119887	0.00118142	0.00125087	0.00124329	0.00129274
Terpenoid backbone biosynthesis	0.00521601	0.00496138	0.00498256	0.00501326	0.00429925	0.00419474	0.00431612	0.00446007	0.00454373	0.00485144	0.00474897	0.0047743	0.00474882	0.00483063	0.00479641	0.004901	0.00550726	0.00544367	0.00545139	0.00552345
Tetracycline biosynthesis	0.000970212	0.000797872	0.000784453	0.000853993	0.000664255	0.000602742	0.000599334	0.000668178	0.000789047	0.000722614	0.000668718	0.000638913	0.000256446	0.000382557	0.000173496	0.000182738	0.00078969	0.000821389	0.000790356	0.000856077
Thiamine metabolism	0.00353174	0.00343918	0.00341907	0.00352451	0.00334362	0.00336292	0.00335122	0.00336087	0.0030967	0.00321026	0.00324732	0.00323785	0.0035764	0.00362237	0.00358217	0.00359125	0.00349366	0.00325363	0.00323859	0.00322593
Thyroid hormone synthesis	8.18851e-05	0.000111135	0.000125306	0.000129285	0.000269714	0.000283101	0.00025532	0.000238254	0.000154562	0.000216668	0.000230986	0.000222113	8.31195e-05	0.000104307	5.80271e-05	3.65205e-05	0.000117378	7.12966e-05	4.70688e-05	6.26451e-05
Toll and Imd signaling pathway	0	3.0277e-07	0	0	1.34813e-06	2.47133e-06	1.46093e-06	1.86045e-06	2.59154e-07	0	0	0	0	5.92652e-07	0	6.4003e-07	0	0	0	0
Toluene degradation	3.52289e-06	7.08298e-06	1.39219e-05	1.47102e-05	1.85368e-05	5.29174e-05	2.66224e-05	3.34792e-05	9.39813e-05	8.66674e-05	5.79628e-05	6.22187e-05	1.89001e-06	5.4524e-06	6.24157e-07	3.60744e-06	1.90545e-06	2.77779e-06	9.752e-07	1.96665e-06
Toxoplasmosis	7.61228e-06	7.26647e-06	1.87853e-05	1.96203e-05	1.29684e-06	6.76964e-07	1.77776e-06	4.84252e-06	2.14183e-05	1.35232e-06	1.49076e-05	1.04556e-05	2.46523e-07	4.93877e-07	9.75246e-08	2.52133e-07	1.0399e-05	5.84731e-06	1.67759e-05	5.72742e-06
Tropane, piperidine and pyridine alkaloid biosynthesis	0.00042026	0.0004273	0.000448656	0.000445916	0.000559071	0.000531147	0.000540325	0.000506007	0.000511478	0.000423989	0.000477083	0.000457742	0.000423055	0.000418314	0.000430395	0.000436268	0.000473037	0.000435568	0.000423409	0.000419402
Tryptophan metabolism	0.00073694	0.000583428	0.000604888	0.000673804	0.000404139	0.000473442	0.000466803	0.000451422	0.000840161	0.000870954	0.00068211	0.000727488	0.000659101	0.000633585	0.000721136	0.00071055	0.000599245	0.000597301	0.00065563	0.000585071
Tuberculosis	0.0012383	0.0012706	0.00128879	0.00128418	0.00127168	0.00125644	0.00127569	0.00127562	0.00124415	0.00133366	0.0013032	0.00130636	0.00131418	0.00131869	0.00131873	0.00131809	0.00138106	0.00135239	0.00132921	0.00135832
Two-component system	0.0241813	0.0233383	0.0227443	0.022715	0.0208862	0.0211172	0.0206226	0.0215659	0.0224484	0.0236424	0.0211257	0.0213631	0.0183032	0.0192358	0.0174279	0.017363	0.0214094	0.0229748	0.024587	0.0234515
Type I diabetes mellitus	0.000473652	0.000527067	0.000552207	0.000557635	0.000803581	0.000795441	0.000805932	0.000716986	0.000630414	0.000692135	0.00063204	0.000653825	0.000788485	0.00074532	0.000821332	0.000813983	0.000560962	0.000531345	0.000519189	0.0005256
Type II diabetes mellitus	0.000423181	0.000436438	0.000452322	0.000445184	0.00051703	0.000500708	0.000507682	0.000480175	0.000419204	0.000462152	0.000496229	0.000490924	0.000428006	0.00043633	0.000433711	0.000451028	0.000421752	0.00042386	0.000412621	0.000427498
Tyrosine metabolism	0.00126481	0.00138509	0.00139207	0.00142498	0.00157427	0.00165757	0.00157698	0.00156681	0.00171409	0.00178503	0.00165666	0.00166057	0.00154989	0.00159457	0.00147953	0.00150269	0.00136216	0.00139771	0.00135726	0.00145124
Ubiquinone and other terpenoid-quinone biosynthesis	0.000552678	0.000893042	0.00105491	0.00110005	0.00203547	0.00232087	0.00226729	0.00191509	0.00282101	0.00298533	0.00250853	0.00269176	0.00274311	0.00234175	0.00312666	0.00310727	0.00148163	0.00119464	0.00117819	0.00115003
Ubiquitin mediated proteolysis	5.04535e-07	8.07386e-07	2.69157e-07	4.30885e-07	5.51854e-05	5.40021e-05	5.00677e-05	3.92742e-05	0.00014226	0.000227026	0.000121374	0.000134758	3.80057e-06	1.01344e-05	2.45762e-06	3.782e-06	3.43479e-05	5.25624e-05	2.55157e-05	5.69292e-05
Valine, leucine and isoleucine biosynthesis	0.00484359	0.00452114	0.00455895	0.00457962	0.00349351	0.0036234	0.00364902	0.00379328	0.00450554	0.0041118	0.00397586	0.0040771	0.00469302	0.00460669	0.00487794	0.00492808	0.00424606	0.0044621	0.00466686	0.00444376
Valine, leucine and isoleucine degradation	0.0018619	0.00200345	0.00212082	0.00216684	0.00249377	0.00255925	0.00258172	0.00236232	0.00271758	0.00229351	0.00261855	0.00257319	0.00274097	0.00249202	0.00298735	0.00291076	0.00187593	0.00187629	0.00188715	0.00182884
Vancomycin resistance	0.00271187	0.00268944	0.00264229	0.00266702	0.002357	0.00235934	0.00241851	0.00244676	0.00254643	0.0027715	0.00266951	0.00271667	0.00277179	0.00277326	0.00287957	0.00291947	0.00302139	0.0029654	0.00289442	0.00295928
Various types of N-glycan biosynthesis	0	0	0	0	2.78418e-07	0	1.76016e-08	7.65545e-07	0	0	9.03879e-07	4.46935e-07	3.28698e-07	2.37061e-07	2.14554e-07	9.69743e-08	1.81827e-06	7.35671e-06	1.58501e-05	1.17769e-05
Vibrio cholerae infection	0.000158114	0.000287769	0.000317744	0.000321721	0.000654188	0.000637276	0.000659954	0.000508616	0.000447711	0.000326741	0.00048495	0.000459977	0.000687821	0.000594411	0.000751407	0.000744666	0.000243374	0.000171551	0.000164907	0.000168418
Viral carcinogenesis	0.000399946	0.000387316	0.000391911	0.000392446	0.00031928	0.000333963	0.000331649	0.000346374	0.000348516	0.000451036	0.000390718	0.000413265	0.000427102	0.000435501	0.000432697	0.000450058	0.000418265	0.000420829	0.000410744	0.000424381
Viral myocarditis	7.61228e-06	7.26647e-06	1.87853e-05	1.96203e-05	1.29684e-06	6.76964e-07	1.77776e-06	4.84252e-06	2.14183e-05	1.35232e-06	1.49076e-05	1.04556e-05	2.46523e-07	4.93877e-07	9.75246e-08	2.52133e-07	1.0399e-05	5.84731e-06	1.67759e-05	5.72742e-06
Vitamin B6 metabolism	0.00157739	0.00170913	0.00172409	0.00172758	0.00207581	0.00207134	0.002041	0.002009	0.00188123	0.00172176	0.00191346	0.00186343	0.00178869	0.00182693	0.00166219	0.00164391	0.00190489	0.00174972	0.00163437	0.00174094
Xylene degradation	4.24606e-05	5.43059e-05	4.29723e-05	4.04731e-05	6.66226e-05	8.71e-05	5.34736e-05	8.01686e-05	0.000191027	0.00023939	0.000166288	0.000175848	5.83439e-06	1.66535e-05	3.00376e-06	6.36151e-06	4.25052e-05	8.34859e-05	7.35844e-05	0.000114065
Zeatin biosynthesis	0.000461003	0.000508249	0.000525199	0.000533996	0.000604278	0.000581944	0.000593385	0.000580648	0.000511737	0.000497817	0.000572843	0.000555743	0.000641536	0.000656027	0.000584679	0.000588266	0.000624987	0.000553846	0.000526102	0.000548085
alpha-Linolenic acid metabolism	4.65323e-05	6.41229e-05	8.35035e-05	0.000100406	5.11923e-05	8.87312e-05	6.6358e-05	7.25131e-05	0.000209137	0.000284552	0.000159503	0.0001882	0.000181667	0.000199823	0.00012766	0.000150582	0.00011074	9.12612e-05	9.6446e-05	8.0552e-05
beta-Alanine metabolism	0.000915731	0.000929026	0.00101355	0.00108745	0.00116569	0.00127869	0.00122473	0.00114993	0.00116394	0.00123922	0.00105484	0.00111035	0.00143959	0.00138679	0.00139066	0.00139428	0.00112126	0.000962727	0.000969373	0.000909499
beta-Lactam resistance	0.00432527	0.00417848	0.00409226	0.00405131	0.00418427	0.00422894	0.00426413	0.00429275	0.00440247	0.00443026	0.00434674	0.00438634	0.00452473	0.00432731	0.0047711	0.00471642	0.0041976	0.00426317	0.0042435	0.00418887
p53 signaling pathway	7.61228e-06	7.26647e-06	1.87853e-05	1.96203e-05	1.29684e-06	6.76964e-07	1.77776e-06	4.84252e-06	2.14183e-05	1.35232e-06	1.49076e-05	1.04556e-05	2.46523e-07	4.93877e-07	9.75246e-08	2.52133e-07	1.0399e-05	5.84731e-06	1.67759e-05	5.72742e-06

## Sheet: Table S4
	this_column	Enterobacteriaceae	Other
1	Amoxicillin	0.0873818	0.00406626
2	Azithromycin	0	0.00154146
3	Levofloxacin	0	0.000680773
4	Metronidazole	0.198199	0.011364
5	Water	0	0.00434426

## Sheet: Table S5
#ID	Symbol	sham1_Count	sham2_Count	water1_Count	water2_Count	sham1_FPKM	sham2_FPKM	water1_FPKM	water2_FPKM	FDR	log2FC	regulated
ENSMUSG00000028185	Dnase2b	2282	2078	741	937	13.1254	12.5296	3.95437	4.76256	5.85727e-12	-1.28753	down
ENSMUSG00000028186	Uox	204612	182195	22109	26476	1120.16	1047.39	112.73	128.099	7.24317e-96	-2.90231	down
ENSMUSG00000028189	Ctbs	846	691	1598	1908	4.44318	3.7553	7.72943	8.79567	9.24543e-11	1.28101	up
ENSMUSG00000069833	Ahnak	885	1249	332	346	1.39457	2.48777	0.643109	0.522971	2.1848e-09	-1.56476	down
ENSMUSG00000028238	Atp6v0d2	435	329	32	31	2.52968	2.00646	0.169391	0.159159	2.34315e-20	-3.50608	down
ENSMUSG00000033860	Fgg	203011	205445	1371561	1610679	1755.67	1865.2	10988.2	12287.1	1.28382e-118	2.95823	up
ENSMUSG00000058569	Tmed9	3971	4521	9994	9018	41.357	49.4207	96.6642	82.998	2.17162e-15	1.25536	up
ENSMUSG00000030881	Arfip2	877	1095	2404	1908	4.21973	5.46199	10.5278	7.97259	7.31136e-08	1.22231	up
ENSMUSG00000030882	Dnhd1	353	293	700	545	0.412526	0.328962	0.697177	0.506879	0.000196825	1.04287	up
ENSMUSG00000003824	Syce2	343	381	176	136	3.95432	4.12921	2.06475	1.05087	0.000749264	-1.12016	down
Mus_musculus_newGene_1803	Mus_musculus_newGene_1803	18	20	75	120	0.151165	0.201274	0.687822	1.04889	0.00012913	2.44564	up
Mus_musculus_newGene_1806	Mus_musculus_newGene_1806	543	1190	2508	2223	0.855995	1.97019	3.67329	3.0974	1.54039e-05	1.53762	up
ENSMUSG00000026047	Poglut2	530	639	1166	1312	3.32581	4.21568	6.86736	7.2837	1.92111e-08	1.17351	up
ENSMUSG00000078817	Nlrp12	663	1377	6960	9021	1.41422	3.08559	13.798	17.0167	9.54412e-08	3.05392	up
ENSMUSG00000027406	Idh3b	10923	10076	4627	4359	101.795	98.4859	40.1288	35.4553	7.41176e-17	-1.1311	down
ENSMUSG00000041132	N4bp2l1	4438	4184	860	1085	38.6408	37.4748	6.80134	8.14094	6.84444e-35	-2.05839	down
ENSMUSG00000041135	Ripk2	596	648	4137	5274	3.26109	3.73546	20.9904	25.4621	6.87185e-65	3.00804	up
Mus_musculus_newGene_2593	Mus_musculus_newGene_2593	432	486	219	185	1.55663	1.72258	0.758696	0.571404	0.000178624	-1.0909	down
Mus_musculus_newGene_2598	Mus_musculus_newGene_2598	12	22	111	86	0.039647	0.082039	0.410048	0.329855	7.92948e-05	2.62694	up
ENSMUSG00000111709	Gm3776	151	331	0	7	2.55382	5.87257	0	0.095271	0.00423675	-6.04007	down
ENSMUSG00000025262	Fam120c	224	216	449	590	0.604512	0.611949	1.12779	1.41122	1.43068e-06	1.3288	up
ENSMUSG00000053279	Aldh1a1	85520	75713	36772	23639	616.181	572.49	245.775	150.513	2.11807e-08	-1.31774	down
ENSMUSG00000063445	Nmral1	362	305	759	630	2.32972	2.32963	5.84594	4.51108	6.5684e-06	1.15375	up
ENSMUSG00000019935	Slc17a8	710	826	225	160	2.35899	2.87624	0.692519	0.467811	5.28575e-11	-1.90139	down
ENSMUSG00000019066	Rab3d	573	528	974	1106	2.24381	2.15186	3.49931	3.76966	2.72672e-07	1.00895	up
ENSMUSG00000035498	Cdcp1	118	261	560	703	0.328283	0.760877	1.44684	1.72826	1.16274e-05	1.82121	up
ENSMUSG00000030359	Pzp	315989	277018	944092	1191179	998.525	918.762	2770.14	3330.9	5.62672e-36	1.93846	up
ENSMUSG00000030357	Fkbp4	9612	8786	3502	3767	64.3309	61.7451	21.9481	22.5398	1.03674e-21	-1.24782	down
ENSMUSG00000073460	Pnldc1	116	93	39	23	0.930855	0.80094	0.289301	0.149713	0.00794317	-1.6544	down
ENSMUSG00000075701	Selenos	3535	3089	6447	6631	44.572	40.8898	76.6476	74.132	2.10188e-14	1.07411	up
ENSMUSG00000043067	Dpy19l1	3448	3625	14257	17432	12.0098	12.4932	43.9718	53.6642	1.05896e-52	2.25293	up
ENSMUSG00000034634	Ly6d	36	24	205	273	0.709112	0.486343	3.76983	4.78133	5.64239e-12	3.08463	up
ENSMUSG00000075289	Carns1	106	225	24	40	0.595786	1.29224	0.084007	0.127964	0.000246608	-2.28844	down
ENSMUSG00000024940	Ltbp3	202	220	47	50	0.627749	0.725827	0.123938	0.125606	6.55634e-07	-2.03021	down
ENSMUSG00000024948	Map4k2	1025	1152	365	333	3.27379	3.9949	1.07731	0.934206	4.91677e-13	-1.54864	down
ENSMUSG00000059534	Uqcr10	1832	2145	977	754	62.4198	76.716	30.8913	22.7015	1.04984e-06	-1.10585	down
ENSMUSG00000026542	Apcs	4497	4059	184851	193860	68.4964	64.8918	2614.72	2609.29	0	5.5603	up
ENSMUSG00000003617	Cp	75297	70321	589125	576054	295.72	276.17	2154.9	1961.72	4.43662e-155	3.09325	up
Mus_musculus_newGene_462	Mus_musculus_newGene_462	117	121	22	27	0.695247	0.783766	0.164526	0.162985	6.89615e-05	-2.19007	down
Mus_musculus_newGene_289	Mus_musculus_newGene_289	142	170	45	33	0.479378	0.549112	0.124843	0.08608	0.0001342	-1.90602	down
ENSMUSG00000001506	Col1a1	221	298	113	75	0.550919	0.780087	0.260731	0.164047	0.00161292	-1.37034	down
ENSMUSG00000010025	Aldh3a2	19000	16951	2906	2341	94.3482	89.5509	13.317	10.3433	4.16916e-56	-2.68085	down
ENSMUSG00000065952	Rps23rg1	279	258	69	66	2.67548	2.68883	0.57744	0.521658	1.25862e-07	-1.89894	down
ENSMUSG00000065954	Tacc1	2544	2328	4541	5077	5.05283	4.98061	8.34871	8.88571	5.38673e-14	1.07262	up
Mus_musculus_newGene_3567	Mus_musculus_newGene_3567	78	105	283	252	0.551467	1.00996	2.62374	0.929632	1.25466e-05	1.6396	up
Mus_musculus_newGene_3560	Mus_musculus_newGene_3560	96	75	26	25	1.63588	1.34061	0.409508	0.371356	0.00885578	-1.6514	down
ENSMUSG00000010651	Acaa1b	51175	51031	1683	814	448.179	469.072	13.6825	6.29672	2.04716e-22	-5.25417	down
ENSMUSG00000022010	Tsc22d1	2852	6173	846	790	24.718	56.3207	8.32008	6.91907	1.27222e-12	-2.3757	down
ENSMUSG00000055612	Cdca7	91	189	29	45	0.552013	1.22232	0.163715	0.239066	0.00387725	-1.83684	down
Mus_musculus_newGene_3388	Mus_musculus_newGene_3388	146	176	34	64	0.676747	0.807406	0.114553	0.235073	0.00216591	-1.63171	down
ENSMUSG00000020522	Mfap3	676	750	1329	1540	2.067	2.43189	3.79894	4.18682	7.54108e-09	1.09834	up
ENSMUSG00000028713	Cyp4b1	293	211	94	117	2.34706	1.83685	0.680694	0.835721	0.0031819	-1.16432	down
ENSMUSG00000028716	Pdzk1ip1	210	187	41	40	2.7841	2.91162	0.494406	0.449244	2.5236e-07	-2.2001	down
Mus_musculus_newGene_2380	Mus_musculus_newGene_2380	2307	3047	51345	75047	7.56265	10.509	157.052	218.847	1.15424e-101	4.64674	up
Mus_musculus_newGene_2381	Mus_musculus_newGene_2381	27	18	129	121	0.072774	0.050009	0.332918	0.296237	3.51487e-06	2.5688	up
ENSMUSG00000052392	Acot4	5463	2598	1535	2066	13.6908	6.63344	3.50801	4.43322	0.00176391	-1.06923	down
ENSMUSG00000052934	Fbxo31	2467	3492	7114	8259	8.53408	12.7005	23.3346	26.2782	5.56304e-12	1.45528	up
ENSMUSG00000039826	Trub2	380	517	835	927	1.56845	2.2816	3.14794	3.43423	3.13729e-05	1.06305	up
ENSMUSG00000043953	Ccrl2	59	47	183	281	0.436783	0.296613	1.23146	1.86043	3.70269e-07	2.21843	up
Mus_musculus_newGene_1800	Mus_musculus_newGene_1800	203	184	16	8	1.95783	1.87408	0.141581	0.059959	2.58898e-12	-3.91412	down
ENSMUSG00000070348	Ccnd1	2790	1495	518	634	11.0341	6.20263	1.9008	2.2134	4.72574e-09	-1.80133	down
ENSMUSG00000020069	Hnrnph3	1150	1262	591	539	9.72934	11.2881	4.55856	3.65942	7.16883e-07	-1.00129	down
ENSMUSG00000030968	Pdilt	740	589	172	105	5.9021	4.93019	1.22175	0.656744	2.23984e-10	-2.16343	down
ENSMUSG00000004105	Angptl2	588	394	50	56	2.60136	1.83007	0.202245	0.218932	1.92578e-18	-3.11801	down
ENSMUSG00000070690	Albfm1	4684	3448	1681	1730	30.1428	23.3066	10.0222	9.82384	2.59804e-09	-1.15953	down
ENSMUSG00000033705	Stard9	396	344	69	91	0.464988	0.44573	0.077708	0.097788	2.59003e-10	-2.11912	down
ENSMUSG00000037465	Klf10	2393	2025	954	1087	12.0807	10.6412	4.34589	4.71485	1.1124e-08	-1.02238	down
ENSMUSG00000031708	Tecr	9821	10319	4094	3952	122.794	135.482	48.2699	44.3361	1.66661e-20	-1.23143	down
ENSMUSG00000034285	Nipsnap1	16568	16422	5171	4755	128.622	134.266	37.7678	33.3386	4.58147e-35	-1.63945	down
ENSMUSG00000000957	Mmp14	996	1002	3053	3622	5.88144	5.9931	16.3131	18.5069	7.58196e-31	1.83027	up
ENSMUSG00000049555	Tmie	623	1134	205	131	3.28402	6.2806	1.00136	0.606484	4.52965e-09	-2.29321	down
ENSMUSG00000022351	Sqle	7335	7355	14475	14443	39.3362	41.4017	72.0851	68.4367	8.94165e-19	1.06935	up
ENSMUSG00000034863	Ano8	244	352	120	122	0.970368	1.49087	0.446147	0.419718	0.00140246	-1.21065	down
ENSMUSG00000045790	Ccdc149	128	273	1410	1471	0.57261	1.28267	5.87556	5.83156	2.52208e-17	2.93209	up
Mus_musculus_newGene_1383	Mus_musculus_newGene_1383	106	98	250	248	1.14799	1.12544	2.55054	2.40991	6.31845e-05	1.38029	up
Mus_musculus_newGene_1387	Mus_musculus_newGene_1387	405	683	73	56	1.37308	2.20564	0.26185	0.150115	2.88676e-14	-2.98485	down
ENSMUSG00000042213	Zfand4	2328	1798	653	707	12.1147	9.33949	3.07818	3.17832	3.93214e-14	-1.50819	down
ENSMUSG00000042215	Bag2	273	258	41	79	2.16418	2.14178	0.296112	0.55416	3.99104e-06	-2.05974	down
ENSMUSG00000042216	Sgsm1	153	202	406	337	0.523096	0.683034	1.36555	1.06745	0.000560217	1.15829	up
ENSMUSG00000031147	Magix	606	677	224	195	6.67247	7.82812	2.28935	1.89003	3.6441e-09	-1.52159	down
ENSMUSG00000090272	Mndal	354	315	144	151	3.40605	3.06107	1.1725	1.23237	0.000413197	-1.08892	down
ENSMUSG00000024590	Lmnb1	285	359	99	115	1.48154	1.95536	0.474093	0.524767	1.50637e-05	-1.50034	down
ENSMUSG00000000168	Dlat	4709	4176	2193	1927	17.2605	16.0675	7.46256	6.24154	1.05662e-09	-1.01416	down
ENSMUSG00000026456	Cyb5r1	634	635	270	245	4.12771	4.36633	1.79153	1.64345	5.40053e-07	-1.20787	down
ENSMUSG00000047496	Rnf152	3498	2213	277	582	6.12382	4.05861	0.449826	0.895313	3.92087e-14	-2.64642	down
Mus_musculus_newGene_3812	Mus_musculus_newGene_3812	3012	2951	8583	6264	35.0458	33.0921	83.3905	59.9418	3.32724e-12	1.41233	up
Mus_musculus_newGene_3819	Mus_musculus_newGene_3819	261	238	66	57	1.56744	1.49967	0.363439	0.300736	3.98051e-07	-1.92628	down
ENSMUSG00000000290	Itgb2	136	109	362	376	0.673867	0.568697	1.66961	1.65037	4.13024e-08	1.68381	up
Mus_musculus_newGene_2146	Mus_musculus_newGene_2146	217	169	84	36	1.09372	0.891857	0.390044	0.159648	0.00575445	-1.58293	down
Mus_musculus_newGene_2142	Mus_musculus_newGene_2142	30	60	597	535	0.064614	0.136853	1.38412	1.26762	9.89566e-23	3.74316	up
Mus_musculus_newGene_2857	Mus_musculus_newGene_2857	209	204	30	30	1.3493	1.3853	0.177719	0.169015	6.33351e-10	-2.69089	down
Mus_musculus_newGene_2852	Mus_musculus_newGene_2852	55	55	3088	4644	0.076726	0.080568	4.06931	5.82347	5.7725e-126	6.22247	up
Mus_musculus_newGene_2850	Mus_musculus_newGene_2850	952	1456	16696	20758	2.29623	4.84115	40.1213	49.1022	1.07026e-71	4.04592	up
Mus_musculus_newGene_2851	Mus_musculus_newGene_2851	0	16	817	829	0	0.236904	11.6936	10.6616	0.00756468	6.76382	up
Mus_musculus_newGene_2858	Mus_musculus_newGene_2858	176	141	8	3	1.81172	1.51829	0.069025	0.0219	8.89589e-12	-4.75097	down
Mus_musculus_newGene_639	Mus_musculus_newGene_639	6236	5456	843	742	16.0863	14.9666	2.22651	1.58593	1.77727e-65	-2.78845	down
Mus_musculus_newGene_635	Mus_musculus_newGene_635	1283	1457	8	0	1.96995	2.5057	0.009749	0	5.34469e-05	-8.30678	down
Mus_musculus_newGene_634	Mus_musculus_newGene_634	5351	9664	43	39	7.62554	12.0439	0.045522	0.032846	1.25192e-119	-7.4277	down
Mus_musculus_newGene_636	Mus_musculus_newGene_636	329	211	0	0	1.78467	1.1987	0	0	4.24733e-11	-10.4246	down
Mus_musculus_newGene_630	Mus_musculus_newGene_630	427	487	168	61	2.59946	3.19939	0.790077	0.392747	0.000183268	-1.89469	down
Mus_musculus_newGene_633	Mus_musculus_newGene_633	3868	4387	106	192	7.16749	7.68714	0.194756	0.31248	3.91216e-74	-4.70652	down
Mus_musculus_newGene_632	Mus_musculus_newGene_632	1567	2316	7	83	3.39425	5.15398	0.008783	0.110338	0.000467583	-5.36258	down
ENSMUSG00000053604	Rpia	352	298	116	78	2.8438	2.52292	0.8701	0.554407	1.49028e-05	-1.64701	down
ENSMUSG00000099041	Gm28035	1233	1022	663	302	4.3034	3.74366	2.14613	0.929496	0.00473788	-1.12193	down
ENSMUSG00000107002	0610012G03Rik	1411	1440	717	594	14.4392	15.4698	6.80932	5.36662	6.44106e-07	-1.02658	down
ENSMUSG00000039713	Plekhg5	472	646	177	166	1.77258	2.6057	0.63024	0.562284	1.06378e-07	-1.61381	down
ENSMUSG00000023243	Kcnk5	6093	5639	521	592	26.5674	25.8081	2.10817	2.27805	1.65116e-112	-3.30662	down
ENSMUSG00000023249	Parp3	1160	1402	3072	2870	6.89609	8.67595	15.7213	15.9316	7.80525e-13	1.3055	up
ENSMUSG00000112449	Srp54b	2915	3282	7584	6518	12.0028	14.0199	28.6169	23.3994	3.89919e-14	1.27957	up
ENSMUSG00000050323	Ndufaf6	840	765	275	269	11.472	10.9653	3.48381	3.24468	2.83927e-11	-1.46792	down
ENSMUSG00000031548	Sfrp1	81	80	14	2	0.271727	0.281431	0.041364	0.005979	0.000819812	-3.22528	down
Mus_musculus_newGene_3736	Mus_musculus_newGene_3736	886	600	193	246	0.746044	0.512892	0.17336	0.222618	2.91006e-08	-1.66717	down
ENSMUSG00000015340	Cybb	223	183	910	850	0.692511	0.597068	2.62841	2.33609	1.95723e-21	2.21014	up
ENSMUSG00000029674	Limk1	84	80	201	188	0.368818	0.386227	0.821391	0.748673	0.000580078	1.33931	up
ENSMUSG00000038146	Notch3	125	115	42	32	0.230122	0.221089	0.070399	0.051749	0.00285829	-1.60212	down
ENSMUSG00000025351	Cd63	154	109	768	743	2.13122	1.57934	9.90923	9.11839	3.08074e-22	2.61683	up
Mus_musculus_newGene_2465	Mus_musculus_newGene_2465	234	223	61	70	6.01899	6.01367	1.4348	1.58014	7.45631e-06	-1.71155	down
ENSMUSG00000021508	Cxcl14	52	29	516	481	0.416258	0.287452	3.88103	3.43917	1.35633e-24	3.71722	up
ENSMUSG00000036278	Macrod1	2356	2190	315	213	28.3757	27.6867	3.51844	2.26564	4.66321e-36	-3.00912	down
ENSMUSG00000027227	Sord	128697	108199	27999	21295	809.386	714.201	163.501	118.33	1.40046e-30	-2.16795	down
ENSMUSG00000029992	Gfpt1	1978	2571	7982	9174	4.75269	6.52593	17.7377	19.3515	1.14598e-27	2.00382	up
ENSMUSG00000029999	Tgfa	1841	1684	4130	4526	6.01284	5.77275	12.529	13.0637	1.37653e-22	1.38772	up
ENSMUSG00000034126	Pomt2	1168	1136	2074	2887	3.47541	3.53274	5.73541	7.57774	6.73798e-09	1.1948	up
ENSMUSG00000094806	Cyp2d10	60220	57133	29070	23750	595.887	564.051	254.02	207.614	1.04653e-10	-1.05659	down
ENSMUSG00000029338	Antxr2	2219	2301	5396	5563	5.84166	6.36124	13.2225	13.0316	4.6984e-25	1.36931	up
ENSMUSG00000035299	Mid1	83	161	1543	1459	0.349776	0.780811	5.87836	5.28563	4.80793e-32	3.71025	up
ENSMUSG00000059939	9430015G10Rik	244	324	134	115	1.3533	1.88813	0.726658	0.56462	0.0034698	-1.09772	down
Mus_musculus_newGene_1198	Mus_musculus_newGene_1198	778	1165	118	138	3.72655	5.82234	0.515946	0.581154	1.94896e-21	-2.83621	down
ENSMUSG00000040268	Plekha1	546	510	1015	1175	2.3386	2.4527	4.08888	4.56524	5.33155e-09	1.14318	up
ENSMUSG00000005107	Slc2a9	3876	2914	1544	1257	16.6195	13.1455	6.07302	4.71986	6.2942e-08	-1.18087	down
ENSMUSG00000015357	Clpx	4146	4855	16555	16383	21.3148	26.2255	79.5129	74.8384	1.93075e-40	1.96288	up
ENSMUSG00000040483	Xaf1	187	177	975	510	1.92886	1.47937	7.01842	3.85412	1.11875e-08	2.12873	up
ENSMUSG00000040488	Ltbp4	1343	997	305	280	3.88366	3.02453	0.777378	0.678649	3.35719e-15	-1.90495	down
ENSMUSG00000057229	Dmac2	2663	2506	997	870	18.8063	18.4634	6.84426	5.78514	1.86538e-15	-1.375	down
ENSMUSG00000016194	Hsd11b1	46230	39890	9770	8309	427.988	386.075	83.087	67.3242	4.21344e-42	-2.1568	down
Mus_musculus_newGene_774	Mus_musculus_newGene_774	59	50	112	138	0.425	0.376891	0.754681	0.880189	0.00898239	1.28831	up
Mus_musculus_newGene_776	Mus_musculus_newGene_776	305	348	936	1964	0.930255	1.00336	1.98598	4.11324	1.14105e-10	2.23336	up
ENSMUSG00000018042	Cyb5r3	29645	31869	8896	7316	184.429	207.949	50.483	39.4937	4.69107e-29	-1.8297	down
ENSMUSG00000053411	Cbx7	725	696	193	171	3.35282	3.36868	0.853851	0.702408	1.19719e-14	-1.87128	down
ENSMUSG00000037035	Inhbb	14	24	221	105	0.048669	0.084917	0.711286	0.320648	6.85601e-07	3.19901	up
ENSMUSG00000020926	Adam11	1109	861	249	224	3.27388	2.63937	0.668841	0.572437	9.51755e-16	-1.96335	down
ENSMUSG00000022434	Fam118a	92	168	291	348	0.538102	1.12305	1.58548	1.81319	0.00103263	1.38377	up
ENSMUSG00000035509	Fbxl21	284	354	150	141	1.97559	2.6591	0.994682	0.899414	0.00207854	-1.04111	down
ENSMUSG00000028378	Ptgr1	186	241	41	53	1.19654	1.62624	0.241596	0.299838	1.80708e-06	-2.09551	down
ENSMUSG00000052407	Ccdc171	547	355	185	142	1.77732	1.22239	0.556144	0.405154	0.000175057	-1.36592	down
ENSMUSG00000044361	BC024139	572	555	194	228	3.18066	3.23632	0.984463	1.11791	1.51241e-07	-1.32655	down
ENSMUSG00000024493	Lars	1771	2010	3769	4234	6.60151	7.87281	13.0945	13.9556	2.06068e-13	1.17171	up
ENSMUSG00000029810	Tmem176b	9075	8502	31010	28237	111.613	110.515	341.707	310.761	3.24632e-43	1.84688	up
ENSMUSG00000074754	Smim26	216	204	95	94	6.771	6.69789	2.74872	2.59963	0.00515768	-1.0594	down
ENSMUSG00000017002	Slpi	26	54	478	488	0.431488	0.955611	7.48132	7.27746	2.27918e-20	3.68259	up
ENSMUSG00000015533	Itga2	19	10	1496	2156	0.038471	0.021638	2.88917	3.96383	5.57673e-82	7.06552	up
ENSMUSG00000000673	Haao	28580	29413	8572	8613	323.367	347.381	91.2758	87.6033	8.27654e-45	-1.66279	down
ENSMUSG00000041075	Fzd7	1509	1381	338	492	4.92416	4.72849	1.02387	1.41875	4.48354e-13	-1.7114	down
Mus_musculus_newGene_2654	Mus_musculus_newGene_2654	314	397	162	103	0.943721	1.10741	0.442383	0.241784	0.000756466	-1.32823	down
ENSMUSG00000041920	Slc16a6	203	481	1430	1674	0.748146	2.04145	5.48481	6.2262	2.69667e-09	2.26701	up
Mus_musculus_newGene_985	Mus_musculus_newGene_985	755	854	73	27	4.06386	4.86872	0.354013	0.11683	9.39824e-20	-3.90768	down
ENSMUSG00000061740	Cyp2d22	20326	20030	6061	4933	108.641	112.343	30.1227	23.2956	8.36061e-28	-1.78121	down
ENSMUSG00000006711	D130043K22Rik	695	366	53	69	2.06708	1.14009	0.145183	0.181782	1.75572e-13	-3.02689	down
Mus_musculus_newGene_3302	Mus_musculus_newGene_3302	39	33	84	116	0.162052	0.160174	0.380634	0.488439	0.00631982	1.56331	up
ENSMUSG00000015094	Npdc1	135	95	305	365	1.33496	0.992211	2.821	3.20528	2.65086e-06	1.63458	up
ENSMUSG00000015093	Clic3	180	97	18	8	3.29304	1.85341	0.297022	0.115058	2.12632e-06	-3.31068	down
ENSMUSG00000015090	Ptgds	360	432	21	19	6.34026	8.17741	0.315043	0.272315	4.07747e-26	-4.21602	down
ENSMUSG00000053334	Ficd	629	1042	2146	2044	2.96544	5.16001	9.40599	8.52359	2.74244e-07	1.4158	up
ENSMUSG00000033256	Shf	476	421	156	106	4.80665	4.28761	1.41695	0.888888	6.85601e-07	-1.67849	down
ENSMUSG00000021957	Tkt	10895	11269	3801	3260	50.0002	54.2858	16.2012	13.2174	7.15248e-24	-1.55642	down
ENSMUSG00000023087	Noct	5617	5365	650	951	16.5364	11.9761	2.22627	2.52401	4.61897e-41	-2.69007	down
ENSMUSG00000030786	Itgam	22	25	420	467	0.06797	0.082578	1.23526	1.30673	2.01385e-33	4.32878	up
ENSMUSG00000030787	Lyve1	51	62	211	173	0.257389	0.332612	1.00093	0.77817	1.62293e-05	1.85826	up
ENSMUSG00000030782	Tgfb1i1	129	73	30	27	0.786032	0.360667	0.105392	0.114224	0.00723163	-1.7286	down
ENSMUSG00000033788	Dysf	197	113	57	53	0.436444	0.260402	0.114326	0.100244	0.00839991	-1.39838	down
ENSMUSG00000038068	Rnf144b	1427	2357	4213	4276	4.62764	8.01271	12.7698	12.4127	1.41887e-06	1.25441	up
ENSMUSG00000037206	Islr	130	80	16	12	0.916384	0.554053	0.096632	0.070511	2.99473e-05	-2.80933	down
ENSMUSG00000037204	Atg101	1253	1422	582	527	16.4634	19.6839	6.53151	5.52498	7.45428e-09	-1.1778	down
ENSMUSG00000042292	Mrtfa	389	366	1490	1283	1.37994	1.31873	4.70038	3.84114	2.20405e-22	1.97128	up
ENSMUSG00000028937	Acot7	1176	1076	439	466	11.9315	11.4575	4.12578	4.1796	2.03419e-10	-1.22315	down
ENSMUSG00000075014	Gm10800	165	468	24	17	3.65794	10.9254	0.48103	0.333515	3.45631e-10	-3.85959	down
Mus_musculus_newGene_3844	Mus_musculus_newGene_3844	157	174	13	7	0.695292	0.80676	0.052158	0.026881	3.12581e-11	-3.95358	down
ENSMUSG00000007029	Vars	2339	2656	5327	4293	8.46513	10.1044	18.0475	13.8836	6.20116e-08	1.0396	up
ENSMUSG00000016252	Atp5e	2328	2308	1134	909	81.7626	85.0936	36.9827	28.206	3.26217e-08	-1.08732	down
ENSMUSG00000006777	Krt23	157	167	11	22	1.48026	1.64722	0.094199	0.178712	1.34639e-08	-3.20915	down
ENSMUSG00000029490	Mfsd7a	309	265	153	91	1.68143	1.51023	0.770372	0.434748	0.00745392	-1.13531	down
ENSMUSG00000078922	Tgtp1	310	298	3388	1683	1.62302	1.63377	16.6828	7.79145	1.00678e-21	3.16102	up
ENSMUSG00000078920	Ifi47	853	1157	7572	5304	7.51958	10.669	62.1982	41.6958	1.3641e-29	2.77407	up
ENSMUSG00000078921	Tgtp2	174	116	808	412	0.913943	0.638508	3.94791	1.91589	2.20369e-07	2.17547	up
Mus_musculus_newGene_3406	Mus_musculus_newGene_3406	581	480	1006	1250	7.33508	6.36645	11.8018	13.9521	1.02079e-07	1.1791	up
ENSMUSG00000041220	Elovl6	12602	8975	2335	3379	31.6098	24.0676	5.7108	7.66965	2.54186e-15	-1.82701	down
ENSMUSG00000040170	Fmo2	1100	679	313	372	4.03269	2.66695	1.07607	1.25456	2.63853e-05	-1.2836	down
ENSMUSG00000025464	Paox	3598	3058	1202	1244	16.8152	15.4967	5.69377	6.32153	3.58352e-17	-1.35138	down
ENSMUSG00000039234	Sec24d	5577	6743	15603	16200	21.1528	26.8459	54.9051	54.2696	8.08683e-21	1.45862	up
ENSMUSG00000039236	Isg20	80	135	501	379	1.07713	1.914	6.3528	4.5594	4.37113e-08	2.12574	up
ENSMUSG00000068250	Amn1	379	383	137	144	4.14897	4.49307	1.549	1.56599	3.68678e-06	-1.34767	down
ENSMUSG00000054435	Gimap4	385	199	104	93	3.18617	1.70662	0.790034	0.671001	0.00134663	-1.4702	down
ENSMUSG00000033429	Mcee	1613	1774	560	531	30.0417	34.5945	9.89901	8.72535	3.98958e-17	-1.54223	down
ENSMUSG00000026177	Slc11a1	137	127	389	383	0.872309	0.850393	2.3076	2.16018	1.29429e-08	1.64085	up
ENSMUSG00000026170	Cyp27a1	31779	29794	12759	9627	248.452	244.473	92.618	66.4936	2.5387e-13	-1.36354	down
ENSMUSG00000038742	Angptl6	581	389	81	105	5.43125	3.80784	0.69811	0.86173	5.28074e-11	-2.29063	down
ENSMUSG00000003316	Glg1	1780	1770	3042	3904	3.78591	3.91506	5.96752	7.32243	1.87764e-09	1.05752	up
ENSMUSG00000026820	Ptges2	766	943	2079	1568	2.28947	2.9479	5.77698	4.13629	8.84369e-07	1.18788	up
ENSMUSG00000026822	Lcn2	192	1034	643256	591560	3.09898	17.5429	9656.27	8450.01	1.72486e-22	10.0601	up
ENSMUSG00000028469	Npr2	3722	3290	1299	1096	15.6079	14.3394	4.87876	3.9214	4.53389e-16	-1.45477	down
ENSMUSG00000028467	Gba2	1039	1062	284	300	4.3352	4.64798	1.10045	1.10411	1.70843e-18	-1.75562	down
ENSMUSG00000028464	Tpm2	260	152	49	44	2.62018	1.99741	0.526265	0.461723	2.71438e-05	-2.05074	down
ENSMUSG00000028461	Ccdc107	1893	1992	841	744	33.6935	37.5397	13.9428	11.6462	3.77006e-11	-1.20018	down
ENSMUSG00000031004	Mki67	109	111	31	38	0.159863	0.168418	0.04151	0.048306	0.00371434	-1.58282	down
ENSMUSG00000014551	Mrps25	1935	1549	803	543	4.7116	3.95851	1.81447	1.16662	1.95156e-06	-1.27374	down
ENSMUSG00000050122	Vwa3b	37	64	212	256	0.216103	0.375657	1.12938	1.30077	3.71321e-07	2.29922	up
ENSMUSG00000000204	Slfn4	16	16	205	236	0.05713	0.060746	0.720677	0.7791	1.22041e-16	3.87521	up
ENSMUSG00000041757	Plekha6	6531	7904	1682	2112	13.7579	17.5867	4.00561	4.38649	9.25353e-24	-1.83965	down
ENSMUSG00000056602	Fry	69	97	193	223	0.093507	0.136985	0.473704	0.439163	0.000669318	1.41398	up
ENSMUSG00000046805	Mpeg1	1551	1521	7315	7402	5.29022	5.44645	23.1801	22.3198	3.08438e-76	2.35242	up
ENSMUSG00000089774	Slc5a3	848	522	194	185	1.14866	0.741206	0.244094	0.221157	4.99828e-08	-1.75807	down
ENSMUSG00000003721	Insig2	6770	7627	14978	21431	38.4758	45.7128	80.8205	111.635	4.82372e-13	1.42544	up
Mus_musculus_newGene_2955	Mus_musculus_newGene_2955	174	212	78	83	0.514652	0.657945	0.213977	0.21586	0.00456261	-1.17128	down
Mus_musculus_newGene_1703	Mus_musculus_newGene_1703	122	123	7	5	0.835218	0.886817	0.043267	0.028182	8.42502e-10	-4.25799	down
Mus_musculus_newGene_1701	Mus_musculus_newGene_1701	1169	1003	172	117	8.19931	7.36543	1.09968	1.19188	2.02383e-24	-2.81281	down
ENSMUSG00000003541	Ier3	63	27	330	351	0.811303	0.363465	4.00449	4.05159	3.81637e-11	3.01538	up
ENSMUSG00000019689	Fmc1	421	439	134	141	12.9778	14.2014	3.83983	3.84023	3.43788e-08	-1.55356	down
ENSMUSG00000000567	Sox9	221	257	2845	1854	0.78814	0.964047	9.44932	5.85765	5.94378e-37	3.39385	up
ENSMUSG00000029135	Fosl2	438	372	1091	1365	0.988935	0.882093	2.29218	2.72788	5.79449e-15	1.69079	up
ENSMUSG00000022707	Gbe1	10310	8827	3703	3252	50.8461	45.7017	16.92	14.1324	3.09433e-17	-1.3654	down
ENSMUSG00000032051	Fdx1	7520	6498	1915	1625	106.232	99.0559	23.1332	19.448	5.55005e-29	-1.8903	down
ENSMUSG00000032946	Rasgrp2	599	695	243	220	4.85597	5.90327	1.98291	1.66041	5.83163e-08	-1.39049	down
ENSMUSG00000046519	Golph3l	436	729	1285	1190	2.28235	4.10075	6.22252	5.50044	8.74925e-05	1.17698	up
Mus_musculus_newGene_47	Mus_musculus_newGene_47	41	21	155	142	0.164476	0.124172	0.595964	0.579675	1.75244e-05	2.35675	up
Mus_musculus_newGene_46	Mus_musculus_newGene_46	5	0	109	87	0.01778	0	0.440295	0.359483	6.14597e-08	5.3926	up
ENSMUSG00000031637	Lrp2bp	119	91	35	28	0.580505	0.482014	0.137549	0.105292	0.00493007	-1.64097	down
ENSMUSG00000031639	Tlr3	334	392	721	712	1.27804	1.54962	2.50213	2.28173	4.25505e-06	1.07238	up
ENSMUSG00000029270	Dipk1a	789	665	263	247	4.28597	3.80381	1.32694	1.18392	4.0578e-09	-1.41754	down
ENSMUSG00000029272	Sult1e1	11	12	345	976	0.126229	0.139469	3.80823	10.2637	6.51115e-26	5.92381	up
ENSMUSG00000029273	Sult1d1	17527	12597	4741	5910	107.129	80.8106	26.9066	31.912	2.91737e-12	-1.40825	down
ENSMUSG00000035397	Klf16	488	428	117	181	2.69795	2.48197	0.600964	0.883772	3.75599e-06	-1.53173	down
ENSMUSG00000046688	Tifa	1295	1062	31792	27219	7.71663	6.6353	181.48	148.551	1.43863e-178	4.74139	up
Mus_musculus_newGene_1549	Mus_musculus_newGene_1549	6	19	701	1687	0.023433	0.032492	2.22123	5.27266	1.43951e-11	6.6536	up
Mus_musculus_newGene_1096	Mus_musculus_newGene_1096	285	105	1592	1108	3.99682	1.54858	20.7825	13.761	1.51691e-11	2.89404	up
Mus_musculus_newGene_1092	Mus_musculus_newGene_1092	241	257	473	569	1.25104	1.40133	2.27941	2.5986	8.73675e-06	1.15478	up
ENSMUSG00000044937	Ttc41	193	269	581	460	0.815975	1.03066	2.03279	1.52375	8.90817e-05	1.26499	up
ENSMUSG00000032553	Srprb	2109	2737	7306	7783	10.1813	13.8884	32.7459	33.213	8.54459e-22	1.72832	up
ENSMUSG00000032554	Trf	1023737	1005558	2083113	2088602	5907.56	6093.97	11164.3	10657.8	1.07659e-23	1.13196	up
ENSMUSG00000032557	Uba5	2022	2292	6684	7381	12.6314	14.918	38.4189	40.2811	9.86899e-34	1.79516	up
ENSMUSG00000024350	Dnajc18	338	384	804	940	1.06387	1.15772	2.41431	2.66493	1.0241e-09	1.36189	up
ENSMUSG00000056035	Cyp3a11	396390	436259	21098	17201	2501.44	2889.49	123.623	95.9039	2.7028e-156	-4.34821	down
ENSMUSG00000057074	Ces1g	18132	11929	1203	980	112.312	77.549	6.91816	5.36128	2.34209e-59	-3.68602	down
Mus_musculus_newGene_122	Mus_musculus_newGene_122	396	240	43	53	1.10859	0.698001	0.110391	0.128691	7.16581e-10	-2.63463	down
ENSMUSG00000061048	Cdh3	21	28	91	105	0.070608	0.098874	0.284409	0.311777	0.000423088	2.08909	up
ENSMUSG00000038576	Susd4	1932	1502	589	429	9.91816	8.15192	2.83239	1.96774	5.31603e-11	-1.6566	down
ENSMUSG00000019189	Rnf145	2373	2164	537	587	9.70849	9.28516	2.0422	2.13617	2.10174e-31	-1.92132	down
ENSMUSG00000014164	Klhl3	1087	773	281	354	2.24796	1.67733	0.539519	0.645602	7.50712e-08	-1.45872	down
ENSMUSG00000030701	Plekhb1	1507	1241	558	389	10.8518	10.4056	4.05645	2.76107	4.85779e-08	-1.43927	down
ENSMUSG00000037286	Stag1	1826	1600	3119	3856	4.3856	4.06927	6.96439	8.3787	1.46214e-10	1.11611	up
ENSMUSG00000037287	Tbcel	9434	7456	2648	3362	28.2965	23.3879	7.35183	8.90589	5.7108e-14	-1.3999	down
ENSMUSG00000102758	Naaladl2	1091	874	169	114	1.7288	1.4527	0.248415	0.159223	2.28387e-20	-2.69798	down
ENSMUSG00000102752	Gm7694	322	388	5490	4051	1.24342	1.57155	19.7024	13.8315	3.49208e-67	3.84313	up
ENSMUSG00000063972	Nr6a1	958	726	307	343	2.40694	1.90267	0.663902	0.705556	2.7403e-07	-1.28067	down
ENSMUSG00000022575	Gsdmd	1783	1721	3812	3250	14.9592	15.0783	29.7839	24.121	8.38331e-11	1.10548	up
Mus_musculus_newGene_3027	Mus_musculus_newGene_3027	253	130	17	12	0.594709	0.321349	0.035626	0.024408	1.80262e-09	-3.62419	down
ENSMUSG00000020593	Lpin1	15095	16579	2952	4119	45.2175	49.3935	8.06172	9.87149	4.16796e-29	-2.07587	down
ENSMUSG00000020623	Map2k6	704	685	49	71	5.0318	5.13124	0.322473	0.446769	6.11629e-32	-3.44371	down
ENSMUSG00000020629	Adi1	15125	13200	6219	5960	135.423	124.049	51.7041	47.1473	1.03189e-15	-1.12403	down
ENSMUSG00000028032	Papss1	841	1042	2275	2481	4.7396	6.20239	11.8553	12.3011	4.2285e-14	1.42649	up
ENSMUSG00000048915	Efna5	151	104	221	349	0.550344	0.398529	0.751148	1.13042	0.00278086	1.2495	up
ENSMUSG00000005268	Prlr	8333	6874	2106	1920	27.4257	24.6161	4.23331	3.74574	7.73809e-29	-1.82271	down
ENSMUSG00000026669	Mcm10	5083	5255	861	999	15.4494	17.4075	2.42717	2.68165	2.11091e-58	-2.38434	down
ENSMUSG00000042988	Notum	2693	2784	105	127	18.1248	19.8745	0.649034	0.744813	2.16234e-121	-4.47081	down
ENSMUSG00000040852	Plekhh2	106	64	10	24	0.225727	0.142182	0.019904	0.045134	0.00410031	-2.23473	down
ENSMUSG00000040855	Reps2	3032	2614	4388	6287	5.84968	5.2897	7.85902	10.7157	1.41025e-06	1.00766	up
ENSMUSG00000029630	Cyp3a25	71572	57472	3187	3704	531.411	447.695	21.9766	24.2948	1.32876e-154	-4.13518	down
ENSMUSG00000026082	Rev1	1115	945	437	436	5.0408	4.09588	1.71818	1.53472	4.24643e-08	-1.14534	down
ENSMUSG00000095742	CAAA01147332.1	162	165	61	46	9.50338	10.146	3.32263	2.3931	0.00108294	-1.51684	down
ENSMUSG00000028952	Zbtb48	780	1149	479	400	5.94074	9.13883	3.29401	2.7316	0.000394532	-1.04214	down
ENSMUSG00000000739	Sult5a1	477	470	107	65	3.5331	4.31034	0.493873	0.444048	4.18702e-11	-2.36373	down
ENSMUSG00000024525	Impa2	206	207	44	42	0.60277	0.635525	0.11838	0.106989	1.70827e-07	-2.17125	down
ENSMUSG00000056917	Sipa1	578	674	249	195	2.49967	2.99713	0.909465	0.703159	7.13064e-07	-1.40175	down
ENSMUSG00000051495	Irf2bp2	1397	1673	3507	3060	4.06567	5.11035	9.48049	7.87193	3.25299e-10	1.18971	up
ENSMUSG00000042638	Gucy2c	0	10	349	750	0	0.037698	1.2105	2.4739	0.00344011	6.85057	up
ENSMUSG00000038188	Scarf1	1286	1107	169	124	6.58401	5.95051	0.802905	0.557482	9.28667e-31	-2.93366	down
ENSMUSG00000050541	Adra1b	3877	4091	1999	1653	25.5003	29.7614	13.3932	9.57332	9.8545e-09	-1.03139	down
ENSMUSG00000047446	Arl4a	1104	1109	2394	2545	6.1168	6.46997	11.3078	11.5974	6.66005e-17	1.24964	up
ENSMUSG00000015224	Cyp2j9	921	875	229	88	6.68638	6.66655	1.5376	0.561699	3.12134e-08	-2.39932	down
ENSMUSG00000052562	Slc22a30	19629	17453	2173	1959	124.803	117.126	12.7162	11.0103	7.48509e-101	-3.07158	down
ENSMUSG00000052563	D930048N14Rik	580	790	91	87	2.50174	3.57908	0.359062	0.328955	3.62302e-21	-2.8537	down
ENSMUSG00000052566	Hook2	3124	2478	1298	1037	17.3246	14.4715	6.73021	5.17968	5.99347e-08	-1.16607	down
ENSMUSG00000052565	H1f3	4	25	98	102	0.007703	0.051618	0.180665	0.178835	0.00120659	2.86971	up
ENSMUSG00000033355	Rtp4	617	772	2412	1323	5.61408	8.12667	24.6855	12.2758	2.91176e-06	1.52508	up
ENSMUSG00000036181	H1f2	838	2574	7557	7567	7.94403	25.6129	66.5308	63.388	0.00697926	2.23343	up
ENSMUSG00000039982	Dtx4	306	469	986	1021	0.864147	1.39263	2.59106	2.55316	1.40457e-07	1.4619	up
ENSMUSG00000039985	Sinhcaf	211	187	71	69	1.16817	1.18842	0.346494	0.363357	0.000423088	-1.41417	down
ENSMUSG00000039989	Cbx4	1882	2300	769	933	5.37477	6.89392	2.03912	2.3527	3.79251e-09	-1.2084	down
ENSMUSG00000037580	Gch1	16132	13288	3876	4160	85.9855	74.341	19.1796	19.5878	3.71409e-33	-1.77962	down
ENSMUSG00000037583	Nr0b2	3250	3339	895	1052	42.4599	45.788	10.8567	12.1405	4.30612e-26	-1.66868	down
ENSMUSG00000060703	Cd302	14552	12715	28076	29700	159.857	146.767	285.858	288.959	2.53488e-19	1.17572	up
ENSMUSG00000030111	A2m	4	29	27137	54946	0.012656	0.096396	80.945	155.968	3.40433e-21	11.3546	up
ENSMUSG00000031861	Lpar2	311	173	33	26	0.81373	0.479281	0.075565	0.05681	6.11012e-09	-2.93821	down
ENSMUSG00000039470	Zdhhc2	74	70	181	222	0.321068	0.320268	0.734824	0.857402	6.97184e-05	1.57484	up
ENSMUSG00000039474	Wfs1	867	1417	2318	2206	3.38406	5.80794	8.41271	7.61151	8.36895e-05	1.07567	up
ENSMUSG00000048498	Cd300e	47	31	176	188	0.33093	0.229407	1.15319	1.17558	4.83633e-07	2.3159	up
ENSMUSG00000021036	Sptlc2	1159	1063	2543	2687	2.55363	2.45852	5.20449	5.23174	1.72914e-18	1.32702	up
ENSMUSG00000048497	Mmgt2	49	33	162	180	0.473278	0.45234	1.62272	1.84137	3.94106e-06	2.15328	up
ENSMUSG00000029552	Tes	96	50	476	607	0.575997	0.31712	2.67384	3.24683	2.21521e-15	2.98369	up
ENSMUSG00000068114	Ccdc134	170	300	821	670	1.30785	2.32443	5.72684	4.46291	4.47278e-07	1.75678	up
ENSMUSG00000028207	Asph	2905	2673	5594	6472	9.73782	9.19008	16.5611	18.0117	6.88675e-17	1.20406	up
ENSMUSG00000033831	Fgb	252180	251764	1691390	2003448	979.062	1025.9	6097.38	6872.39	1.55007e-116	2.96425	up
ENSMUSG00000027478	Dnmt3b	45	66	216	209	0.150243	0.234095	0.700336	0.64517	2.06801e-06	2.02747	up
ENSMUSG00000027474	Ccm2l	217	187	73	49	1.42499	1.2662	0.433734	0.280967	0.000294854	-1.63034	down
ENSMUSG00000027784	Ppm1l	1075	1051	2708	3507	1.68789	1.73221	3.9483	4.8667	1.1677e-19	1.63677	up
ENSMUSG00000026785	Pkn3	90	128	21	10	0.440332	0.640968	0.113708	0.038377	8.84015e-05	-2.71773	down
ENSMUSG00000030870	Ubfd1	2472	2821	4679	5347	7.59652	9.03371	13.2914	14.4272	2.62917e-10	1.01126	up
ENSMUSG00000030871	Ears2	458	490	959	938	3.30842	3.71472	6.4352	5.99114	5.32024e-08	1.09281	up
ENSMUSG00000014353	Tmem87b	2032	2042	5103	6439	6.66073	7.4224	15.8557	19.7512	1.09182e-22	1.59165	up
ENSMUSG00000009092	Derl3	83	139	3699	3493	0.926683	1.62188	38.4622	34.5658	6.35944e-95	5.10821	up
Mus_musculus_newGene_1789	Mus_musculus_newGene_1789	82	86	727	691	0.667616	0.685555	4.60981	4.08198	4.69556e-35	3.16994	up
ENSMUSG00000017718	Afmid	6378	5961	378	298	41.6054	40.9718	2.27053	1.70426	1.57818e-114	-4.09501	down
ENSMUSG00000017713	Tha1	311	496	1022	1114	2.59112	4.34285	7.92847	8.21944	1.94781e-07	1.4925	up
ENSMUSG00000019577	Pdk4	118	75	317	1008	0.497876	0.333897	1.24665	3.78119	5.68693e-08	2.86121	up
ENSMUSG00000049488	Tmem67	119	181	372	391	0.479523	0.767947	1.44508	1.45914	3.66849e-05	1.43586	up
ENSMUSG00000090394	4930523C07Rik	688	575	181	362	1.80388	1.5809	0.44207	0.839387	0.00294255	-1.1324	down
ENSMUSG00000023942	Slc29a1	10737	13599	4219	4578	80.8792	109.832	29.6469	30.7092	1.55801e-15	-1.37842	down
ENSMUSG00000023947	Nfkbie	145	130	852	977	0.877352	0.832373	4.8047	5.26217	7.34533e-35	2.82467	up
ENSMUSG00000019960	Dusp6	3041	1693	643	1120	16.0875	9.3954	3.24284	5.23422	0.00012927	-1.33569	down
ENSMUSG00000054263	Lifr	26153	23412	4148	4602	71.6929	63.0587	7.51072	8.63675	3.25055e-77	-2.4103	down
ENSMUSG00000073435	Nme3	133	154	28	59	2.73337	3.33791	0.52625	1.0608	0.00450373	-1.63831	down
ENSMUSG00000073436	Eme2	845	882	1724	1751	2.56308	2.71046	4.82282	4.72558	2.32731e-11	1.10049	up
ENSMUSG00000046574	Prr12	847	988	421	366	1.78289	2.18268	0.822162	0.679615	1.65281e-06	-1.12859	down
ENSMUSG00000004891	Nes	85	72	14	4	0.205033	0.180324	0.031344	0.008534	0.000447445	-3.02195	down
ENSMUSG00000045005	Fzd5	836	889	373	436	1.81308	1.99371	0.738895	0.823866	4.09705e-06	-1.00236	down
ENSMUSG00000041654	Slc39a11	1625	1672	3607	3524	9.22898	9.87358	18.8278	17.359	4.63628e-17	1.20525	up
Mus_musculus_newGene_3382	Mus_musculus_newGene_3382	220	193	85	104	1.55721	1.364	0.657724	0.736955	0.00853306	-1.03692	down
Mus_musculus_newGene_3387	Mus_musculus_newGene_3387	436	338	103	94	6.39588	5.77127	1.2734	1.11759	1.08838e-08	-1.87947	down
ENSMUSG00000091867	Cyp2a22	255	168	41	49	2.09688	1.44884	0.30646	0.354217	3.24443e-06	-2.13965	down
ENSMUSG00000046962	Zbtb21	427	489	992	927	1.52505	1.6806	3.461	3.03941	6.62121e-08	1.15912	up
ENSMUSG00000026576	Atp1b1	8051	6500	1546	2091	46.2065	39.1299	8.23388	10.5971	1.46788e-22	-1.91035	down
ENSMUSG00000026574	Dpt	109	124	46	20	0.933934	1.11161	0.362333	0.151061	0.00896763	-1.72021	down
ENSMUSG00000026575	Nme7	282	341	586	673	2.48301	3.15671	4.82116	5.23252	1.31176e-05	1.10438	up
ENSMUSG00000045136	Tubb2b	65	48	1021	1079	0.438377	0.337896	6.42636	6.46149	9.84736e-63	4.3087	up
ENSMUSG00000003644	Rps6ka1	966	1209	449	573	4.68514	6.13658	1.97371	2.39674	4.66041e-05	-1.00176	down
ENSMUSG00000054065	Pkp3	115	101	32	15	0.615064	0.545573	0.148688	0.066384	0.0014918	-2.10023	down
ENSMUSG00000078496	Zfp982	247	223	97	108	2.46928	2.4291	0.910868	0.953255	0.00233063	-1.10538	down
ENSMUSG00000109482	Gm4756	5691	4896	1182	820	37.242	33.7359	7.23413	4.83734	5.61208e-25	-2.3052	down
ENSMUSG00000023336	Wfdc1	172	87	10	17	1.85042	0.980654	0.090568	0.18915	3.69418e-06	-3.17004	down
ENSMUSG00000052397	Ezr	297	259	777	616	1.38471	1.26725	3.37243	2.5429	7.03842e-08	1.42084	up
ENSMUSG00000041355	Ssr2	4076	4332	9721	10111	59.9526	66.4015	129.894	126.245	4.45419e-25	1.3293	up
ENSMUSG00000031434	Morc4	90	71	358	583	0.326433	0.278079	1.2472	1.92802	5.99452e-13	2.63481	up
ENSMUSG00000031431	Tsc22d3	6261	9429	2389	2713	48.7003	76.4486	17.3388	18.7514	1.90421e-11	-1.53283	down
Mus_musculus_newGene_3533	Mus_musculus_newGene_3533	14183	20713	5517	5456	56.0181	85.8643	20.2332	19.0378	7.55602e-14	-1.57931	down
Mus_musculus_newGene_3537	Mus_musculus_newGene_3537	508	558	937	2348	1.64219	1.89415	2.81524	6.71316	1.27132e-05	1.70444	up
ENSMUSG00000028743	Akr7a5	9149	9791	3086	2787	105.065	118.014	32.9024	28.271	2.08035e-27	-1.59629	down
ENSMUSG00000021266	Wars	1080	1298	2884	2865	5.87484	7.52635	14.6639	13.662	8.55701e-15	1.36467	up
ENSMUSG00000037992	Rara	1386	1572	574	599	6.56645	7.82285	2.5479	2.55724	4.50936e-11	-1.24356	down
ENSMUSG00000035840	Lysmd3	2315	1893	5173	5707	8.07499	6.95374	17.1106	18.9738	8.19121e-20	1.46276	up
ENSMUSG00000035845	Alg12	428	725	1677	1646	2.97073	5.47226	11.177	10.3244	1.64325e-08	1.61619	up
ENSMUSG00000025044	Msr1	363	160	714	727	1.55982	0.691109	2.83218	2.67114	9.15779e-05	1.55917	up
ENSMUSG00000032315	Cyp1a1	158	111	19	11	0.863689	0.635611	0.094621	0.051399	7.49357e-07	-3.06584	down
ENSMUSG00000032313	Tmem266	90	148	12	31	0.415251	0.620444	0.036444	0.130329	0.000773294	-2.38848	down
ENSMUSG00000032311	Nrg4	1701	981	3398	5598	13.2395	7.81873	24.9976	39.3616	3.16777e-09	1.8356	up
ENSMUSG00000032310	Cyp1a2	87870	67734	5032	3880	669.982	542.05	35.6229	26.1331	2.66893e-93	-4.02879	down
ENSMUSG00000060317	Acnat2	580	652	6635	6991	5.29035	6.08027	56.9544	57.5489	1.0284e-129	3.55817	up
ENSMUSG00000021747	Cfap20dc	141	120	18	3	0.774411	0.689201	0.090405	0.014267	1.45712e-05	-3.52973	down
ENSMUSG00000063663	Brwd3	839	834	1550	1726	1.06806	1.11365	1.83181	1.94136	3.01303e-10	1.06044	up
ENSMUSG00000033191	Tie1	483	356	123	76	1.71857	1.34096	0.408973	0.239749	3.79928e-07	-1.97667	down
ENSMUSG00000041559	Fmod	150	122	24	23	0.706947	0.603357	0.104479	0.094976	4.54049e-06	-2.43912	down
ENSMUSG00000027356	Fermt1	24	15	127	140	0.071667	0.045254	0.354452	0.370428	2.36832e-07	2.86846	up
ENSMUSG00000048371	Pdp2	3241	2104	994	1444	8.42164	5.7362	2.39783	3.31396	0.000182652	-1.04199	down
ENSMUSG00000023073	Slc10a2	1945	1319	3947	4746	6.9287	4.93076	13.0557	14.9382	1.14919e-11	1.50565	up
ENSMUSG00000023078	Cxcl13	26	22	1492	1959	0.331683	0.295382	17.8182	22.2582	7.05609e-96	6.25716	up
ENSMUSG00000043687	1190005I06Rik	243	261	87	65	4.29976	4.79139	1.41355	1.02992	2.95328e-05	-1.63472	down
ENSMUSG00000059883	Irak4	414	486	834	875	2.09663	2.58515	3.89497	3.94898	3.7621e-06	1.0158	up
ENSMUSG00000034853	Acot11	391	419	1652	1673	1.01455	1.19098	4.40189	4.20101	1.15463e-33	2.12902	up
ENSMUSG00000034855	Cxcl10	230	154	1731	2713	3.03878	2.15833	21.4683	32.1315	2.72856e-37	3.6217	up
ENSMUSG00000043535	Setx	1486	1466	2500	3654	2.05252	2.11063	3.15406	4.45249	1.00043e-07	1.14744	up
Mus_musculus_newGene_1462	Mus_musculus_newGene_1462	9	8	96	83	0.024091	0.021883	0.397719	0.238345	6.11539e-07	3.49073	up
ENSMUSG00000089960	Ugt1a1	58888	28058	9354	11500	391.662	195.864	57.7672	67.5784	0.00045562	-1.96535	down
ENSMUSG00000032458	Copb2	7694	8168	16204	18661	37.3121	41.575	72.9687	79.96	2.03056e-19	1.22623	up
ENSMUSG00000030246	Ldhb	123	70	20	33	1.38578	0.83796	0.20789	0.334842	0.0095634	-1.77391	down
ENSMUSG00000041598	Cdc42ep4	3779	3935	1759	1705	17.3136	19.2703	7.64416	7.10049	2.73755e-13	-1.06276	down
ENSMUSG00000059714	Flot1	1477	1463	3844	4166	12.0934	12.5016	30.5609	31.9221	9.22866e-29	1.53726	up
ENSMUSG00000038233	Gask1a	407	717	45	14	1.98964	3.37765	0.221216	0.050118	1.84315e-14	-4.15315	down
ENSMUSG00000027016	Zfp385b	2084	1378	288	310	11.6623	8.09318	1.49356	1.53236	3.60307e-22	-2.43933	down
ENSMUSG00000014867	Surf4	16070	16621	40664	40888	72.4732	78.6455	170.225	162.871	5.46319e-33	1.41073	up
ENSMUSG00000027175	Tcp11l1	101	126	269	258	0.272906	0.355352	0.673428	0.614839	0.0002264	1.30653	up
Mus_musculus_newGene_2177	Mus_musculus_newGene_2177	43	44	734	550	0.272497	0.205928	3.12304	3.25619	3.37972e-34	3.97911	up
Mus_musculus_newGene_2170	Mus_musculus_newGene_2170	447	709	7378	9499	3.84315	6.39435	58.9083	72.1764	2.68425e-59	3.95398	up
ENSMUSG00000015806	Qdpr	24645	25009	6853	6854	266.551	282.703	68.4897	65.2655	1.3343e-50	-1.7649	down
Mus_musculus_newGene_601	Mus_musculus_newGene_601	51	36	701	836	0.350134	0.262478	4.52787	5.14124	1.5515e-45	4.23438	up
ENSMUSG00000002233	Rhoc	246	197	480	479	3.02217	2.54348	5.52278	5.26781	9.2976e-06	1.20774	up
ENSMUSG00000078350	Smim1	366	211	46	67	1.81486	1.16248	0.225467	0.34352	8.52359e-07	-2.26046	down
ENSMUSG00000020893	Per1	4268	3241	1401	1527	14.4621	11.3624	4.40675	4.65049	1.79045e-11	-1.26573	down
ENSMUSG00000039741	Bahcc1	796	889	315	387	1.09719	1.28499	0.40191	0.470792	4.92813e-07	-1.17405	down
ENSMUSG00000031570	Plpp5	1045	1284	6352	6727	8.83572	11.4214	52.046	52.8448	1.2926e-54	2.57965	up
ENSMUSG00000031574	Star	226	169	66	83	0.843016	0.689772	0.24373	0.266125	0.00228145	-1.31497	down
ENSMUSG00000030199	Etv6	921	945	1810	1768	2.38419	2.60388	4.41693	4.10349	3.55369e-10	1.03152	up
ENSMUSG00000023272	Creld2	1668	2691	16601	19133	18.0563	30.5833	166.916	183.053	3.95499e-40	3.1225	up
ENSMUSG00000052302	Tbc1d30	970	1011	376	405	2.57826	3.02791	0.989414	1.01289	4.25349e-10	-1.25176	down
ENSMUSG00000038195	Rilp	1560	1359	457	406	15.4935	14.1675	4.20677	3.5634	9.92868e-17	-1.66367	down
ENSMUSG00000038193	Hand2	279	173	46	69	1.75201	1.13741	0.264571	0.380463	7.8012e-05	-1.88371	down
ENSMUSG00000025366	Esyt1	856	954	1701	1714	3.28429	3.81165	5.92375	5.63985	8.43538e-09	1.00732	up
ENSMUSG00000035473	Galm	11575	10165	2866	2186	74.9844	68.6215	17.124	12.3687	3.33414e-26	-2.00902	down
ENSMUSG00000035472	Slc25a21	1165	972	490	428	6.60048	5.77933	2.57709	2.14247	5.14052e-07	-1.12414	down
ENSMUSG00000068196	Col8a1	22	15	76	160	0.063535	0.044091	0.203011	0.407228	4.00872e-05	2.75874	up
ENSMUSG00000032125	Robo4	353	301	133	88	1.36323	1.18119	0.414742	0.279981	0.000120025	-1.46766	down
ENSMUSG00000032123	Dpagt1	2165	2453	4344	4710	14.9478	17.6807	27.3491	28.412	5.12198e-12	1.06167	up
ENSMUSG00000068735	Trp53i11	235	196	55	107	1.29973	1.15654	0.276195	0.525264	0.00632846	-1.32547	down
ENSMUSG00000074826	Gm10767	104	110	38	31	0.773146	0.861006	0.269899	0.199832	0.005826	-1.53917	down
ENSMUSG00000021109	Hif1a	3940	3031	6621	7350	12.3668	9.99062	19.3005	20.3743	4.58222e-10	1.09563	up
ENSMUSG00000009013	Dynll1	542	643	1754	1874	4.14774	4.94456	12.0684	12.5544	6.47075e-20	1.70464	up
ENSMUSG00000069456	Rdh16	6443	6002	1265	1326	29.7352	29.1008	5.41037	5.50605	1.48527e-59	-2.17189	down
ENSMUSG00000078597	Cyp4a12b	6926	10295	4291	3592	42.77	66.729	24.6024	19.6012	1.63422e-05	-1.03558	down
ENSMUSG00000024646	Cyb5a	46785	40866	11014	10682	791.485	728.241	170.005	159.417	7.82478e-48	-1.92084	down
ENSMUSG00000024640	Psat1	32	40	176	167	0.176275	0.237257	0.918946	0.832389	2.85473e-07	2.34387	up
ENSMUSG00000041147	Brca2	283	330	91	106	0.389321	0.476901	0.116293	0.128549	6.1202e-06	-1.54809	down
Mus_musculus_newGene_1161	Mus_musculus_newGene_1161	5	27	99	235	0.074257	0.411302	1.36365	3.08338	2.87818e-05	3.45831	up
ENSMUSG00000058672	Tubb2a	1772	2638	8686	8548	16.2763	25.4331	74.0938	69.3839	3.51326e-21	2.05619	up
ENSMUSG00000061906	Ugt2b38	8126	7652	2762	2534	63.5577	62.8228	20.0581	17.5089	7.79066e-26	-1.4813	down
Mus_musculus_newGene_834	Mus_musculus_newGene_834	296	334	1348	1617	1.51743	1.80206	6.41034	7.34082	2.49717e-30	2.32391	up
Mus_musculus_newGene_833	Mus_musculus_newGene_833	2771	1762	1279	793	5.47583	2.44699	1.71469	1.02642	0.00156731	-1.02844	down
Mus_musculus_newGene_3141	Mus_musculus_newGene_3141	27	34	96	99	0.216616	0.280226	0.729269	0.709235	0.00201575	1.76723	up
ENSMUSG00000036026	Tmem63b	5586	4786	2164	2413	25.3921	22.8384	9.08985	9.68192	1.59633e-12	-1.08832	down
ENSMUSG00000008999	Bmp7	173	157	50	45	0.693905	0.660459	0.184329	0.157545	0.000157358	-1.70272	down
ENSMUSG00000020917	Acly	34316	23994	6913	7520	116.226	85.4396	21.6993	22.3835	8.6232e-24	-1.92082	down
ENSMUSG00000018927	Ccl6	68	45	910	944	0.698508	0.478476	8.67077	8.56765	5.12897e-50	4.1297	up
ENSMUSG00000043019	Edem3	3858	4054	9335	12071	9.02821	9.95186	20.3682	25.0636	2.52155e-20	1.52455	up
ENSMUSG00000043013	Onecut1	507	639	1410	1834	1.89515	2.50359	4.89231	6.05434	4.41628e-12	1.58869	up
ENSMUSG00000029185	Fam114a1	1427	1606	3789	3975	7.18553	8.48353	17.7971	17.7727	2.96422e-21	1.44691	up
ENSMUSG00000026981	Il1rn	76	98	13797	19221	0.520109	0.747807	92.6612	121.849	1.45474e-258	7.65507	up
ENSMUSG00000026980	Ly75	229	208	797	766	0.488749	0.466556	1.58548	1.45044	7.41208e-18	1.93182	up
ENSMUSG00000026986	Hnmt	2601	1868	356	294	23.3642	17.527	2.97545	2.33044	9.39168e-30	-2.68494	down
ENSMUSG00000029455	Aldh2	141552	134804	61922	64073	564.49	557.105	225.226	222.169	5.25319e-20	-1.04106	down
ENSMUSG00000025757	Hspa4l	1133	1216	1951	2538	1.79481	2.00313	2.87163	3.53502	1.47553e-07	1.02286	up
ENSMUSG00000032081	Apoc3	52124	52864	24692	22781	1442.77	1535.64	635.543	557.863	8.65732e-16	-1.05192	down
ENSMUSG00000032080	Apoa4	6883	10490	45882	43620	56.095	89.7247	347.202	314.095	2.09882e-29	2.4551	up
ENSMUSG00000032085	Tagln	391	353	120	94	3.61836	3.43635	1.03329	0.76547	2.33808e-07	-1.70241	down
ENSMUSG00000020137	Thap2	943	803	1696	2486	3.09353	2.71485	4.90561	6.75911	7.33129e-09	1.34868	up
ENSMUSG00000020131	Pcsk4	1577	1279	385	272	9.54736	7.81575	2.08078	1.39994	7.00548e-15	-2.02255	down
ENSMUSG00000075256	Cerkl	38	46	932	974	0.345034	0.435175	7.93248	7.92926	4.73057e-65	4.59512	up
ENSMUSG00000044350	Lacc1	709	578	2123	2053	4.33788	3.68794	12.0116	11.0913	1.40823e-22	1.79198	up
ENSMUSG00000005397	Nid1	517	289	644	1001	1.25534	0.73465	1.45124	2.1457	0.00238809	1.11974	up
ENSMUSG00000033021	Gmppa	1312	2045	3262	3123	13.5663	22.6939	31.9158	28.6817	5.50794e-05	1.01735	up
ENSMUSG00000024939	Fam89b	174	157	38	63	2.15469	2.02679	0.420502	0.682596	0.000952622	-1.62478	down
ENSMUSG00000017057	Il13ra1	2795	2140	5802	8485	11.1364	8.94859	21.4668	29.8723	4.30461e-13	1.62283	up
ENSMUSG00000019232	Etnppl	15220	16300	764	983	50.523	56.7915	2.35117	2.8962	2.18276e-142	-4.08451	down
ENSMUSG00000014778	Fhod1	459	609	111	133	1.72606	2.40458	0.386762	0.440117	4.57806e-11	-2.04152	down
ENSMUSG00000014771	Pdcd2	469	364	210	162	6.17025	5.0269	2.51229	1.88208	0.00133976	-1.06635	down
ENSMUSG00000014773	Dll1	586	563	99	72	2.42041	2.45931	0.379713	0.26213	2.33608e-18	-2.65296	down
ENSMUSG00000061718	Ppp1r1b	279	277	31	27	2.08943	2.14374	0.206286	0.171775	2.78959e-15	-3.16782	down
ENSMUSG00000025512	Chid1	1633	1845	3847	5018	5.78828	6.89139	12.7358	15.6621	9.83912e-15	1.43796	up
ENSMUSG00000023829	Slc22a1	20961	19750	9852	8749	156.469	154.851	68.3317	57.7564	4.91821e-13	-1.03595	down
ENSMUSG00000067656	Slc22a27	75	92	13	12	0.511512	0.662135	0.07791	0.071137	0.000134053	-2.64841	down
ENSMUSG00000022885	St6gal1	4130	4868	22745	27205	14.2374	17.1945	87.4144	105.877	1.84343e-58	2.56166	up
ENSMUSG00000005057	Sh2b2	147	152	32	56	0.815287	0.862301	0.152588	0.25766	0.00132304	-1.67824	down
ENSMUSG00000030934	Oat	45300	59678	8546	16881	311.566	430.776	54.5437	102.75	0.00027758	-1.96365	down
ENSMUSG00000071042	Rasgrp3	268	99	38	20	0.839046	0.325216	0.110131	0.053127	0.000191399	-2.55687	down
ENSMUSG00000030207	Fam234b	2341	2105	5618	6241	8.2215	7.74176	18.2781	19.3397	8.27659e-27	1.50699	up
ENSMUSG00000073680	Tmem88b	236	225	53	37	1.00534	1.00516	0.20748	0.138639	1.21782e-07	-2.26101	down
ENSMUSG00000022304	Dpys	16121	15519	4685	4373	108.951	109.887	29.1992	26.02	1.4086e-39	-1.71119	down
ENSMUSG00000035186	Ubd	25	12	614	299	0.395183	0.199381	9.04932	4.19501	3.14937e-19	4.72887	up
ENSMUSG00000034586	Hid1	61	43	494	689	0.274268	0.203274	2.07996	2.7716	1.15324e-26	3.59761	up
ENSMUSG00000025656	Arhgef9	230	164	85	87	0.775336	0.490227	0.263293	0.211924	0.00988922	-1.10178	down
ENSMUSG00000051149	Adnp	1571	2365	596	1133	4.71635	7.44799	1.6559	3.00435	0.00155573	-1.10503	down
Mus_musculus_newGene_3845	Mus_musculus_newGene_3845	1264	1171	33	32	16.0373	14.7131	0.30514	0.355199	4.14266e-79	-5.13475	down
ENSMUSG00000057425	Ugt2b37	463	598	137	205	3.61102	4.89964	0.992116	1.41155	3.12184e-06	-1.5473	down
ENSMUSG00000002109	Ddb2	224	247	107	87	1.66288	1.9347	0.724306	0.504845	0.00198139	-1.18597	down
ENSMUSG00000046179	E2f8	71	126	773	562	0.281492	0.52788	2.88078	1.98736	1.5838e-14	2.85346	up
Mus_musculus_newGene_682	Mus_musculus_newGene_682	246	230	2	0	1.69117	1.69091	0.007404	0	1.14919e-11	-7.80074	down
ENSMUSG00000095041	AC149090.1	8125	9845	3937	3351	39.068	50.1092	17.6572	13.9908	5.14459e-11	-1.20909	down
ENSMUSG00000090622	A930033H14Rik	425	516	130	50	2.11571	2.69447	0.600991	0.218307	2.69415e-06	-2.28528	down
Mus_musculus_newGene_3477	Mus_musculus_newGene_3477	81	71	19	24	0.430657	0.391612	0.096955	0.108433	0.00968997	-1.73096	down
ENSMUSG00000093445	Lrch4	157	139	268	394	0.950764	1.02198	1.36671	1.75707	0.000387073	1.24962	up
ENSMUSG00000022146	Osmr	96	74	1903	2279	0.257636	0.207529	4.80904	5.43304	4.47975e-99	4.71166	up
Mus_musculus_newGene_2789	Mus_musculus_newGene_2789	0	0	121	171	0	0	0.298941	0.404192	1.80262e-09	9.72061	up
ENSMUSG00000025492	Ifitm3	13190	14995	28819	24558	287.758	343.36	583.808	473.381	1.17923e-09	1.01464	up
Mus_musculus_newGene_2435	Mus_musculus_newGene_2435	2	2	1217	1115	0.001357	0.001329	1.05486	0.971842	2.17708e-33	9.28073	up
Mus_musculus_newGene_2437	Mus_musculus_newGene_2437	1942	1922	7844	10414	5.29033	5.58126	20.7241	25.2893	1.6286e-42	2.32909	up
ENSMUSG00000035967	Ints6l	336	289	114	150	1.38445	1.2841	0.494003	0.648559	0.000759231	-1.15315	down
ENSMUSG00000028179	Cth	30711	32559	6724	7575	250.286	278.503	50.878	54.5408	1.2456e-57	-2.05529	down
ENSMUSG00000021556	Golm1	136	122	336	367	0.508357	0.477522	1.1669	1.2111	3.00431e-07	1.53792	up
ENSMUSG00000060586	H2-Eb1	573	430	91	100	5.06979	4.02443	0.741855	0.772497	1.13176e-13	-2.29965	down
ENSMUSG00000053113	Socs3	475	527	7509	5834	2.75289	3.20528	40.4097	29.8731	1.70325e-86	3.82986	up
ENSMUSG00000027253	Lrp4	2737	2181	333	443	5.10659	4.27037	0.576849	0.729017	5.88552e-33	-2.57346	down
ENSMUSG00000037573	Tob1	11331	9163	2988	4036	73.2515	62.1704	17.9318	23.0514	5.42307e-14	-1.45493	down
ENSMUSG00000034177	Rnf43	2213	2292	767	743	7.65823	8.29017	2.46864	2.26553	3.71975e-20	-1.48469	down
ENSMUSG00000034171	Faah	11552	11269	2889	2310	44.6474	45.7128	10.3649	7.88783	5.08605e-33	-2.03895	down
ENSMUSG00000074513	Arfip1	1522	1416	2649	2922	9.04599	8.70798	14.7786	16.2913	1.75836e-11	1.01456	up
ENSMUSG00000060807	Serpina6	25953	17794	226	142	239.443	172.192	1.93149	1.15483	1.0372e-151	-6.79379	down
ENSMUSG00000060802	B2m	98317	99884	49045	42187	1691.04	1803.14	783.271	641.104	5.12198e-12	-1.02536	down
ENSMUSG00000060803	Gstp1	128876	161629	52284	48859	2331.31	3066.98	878.705	781.736	1.84257e-17	-1.43064	down
ENSMUSG00000034795	Ccdc122	366	319	718	754	3.18213	2.89579	5.72608	5.73884	6.41434e-08	1.19603	up
ENSMUSG00000035227	Spcs2	5915	6060	13737	14583	30.1433	32.4902	77.4528	65.8684	3.87685e-28	1.33309	up
ENSMUSG00000032796	Lama1	201	136	20	32	0.310849	0.220246	0.02851	0.043419	1.35527e-06	-2.60583	down
ENSMUSG00000016520	Lnx2	1256	924	2219	2173	4.07399	3.14614	6.68729	6.23081	9.19095e-08	1.10499	up
ENSMUSG00000024222	Fkbp5	1359	1823	7968	9646	5.69227	8.04628	31.0163	35.892	1.34232e-38	2.5566	up
ENSMUSG00000027750	Postn	363	155	54	58	1.70668	0.749034	0.229367	0.233006	7.37293e-05	-2.11279	down
ENSMUSG00000025403	Shmt2	13560	13614	5905	5568	88.1639	92.9022	35.628	31.9359	8.53556e-19	-1.15109	down
Mus_musculus_newGene_2238	Mus_musculus_newGene_2238	881	1019	2573	1882	0.946088	1.18245	2.9688	2.21806	1.52498e-08	1.32453	up
Mus_musculus_newGene_2231	Mus_musculus_newGene_2231	822	592	38	121	4.07488	3.34462	0.171656	0.691195	3.09359e-10	-3.07009	down
Mus_musculus_newGene_722	Mus_musculus_newGene_722	675	316	12	9	4.33164	2.09952	0.055892	0.038724	7.85358e-24	-5.4619	down
ENSMUSG00000025868	Higd2a	1824	2103	984	854	41.6332	50.3808	20.8418	17.2149	4.41316e-07	-1.00237	down
ENSMUSG00000036805	Noxa1	14	25	104	91	0.124037	0.239421	0.893072	0.739503	0.000188697	2.4129	up
ENSMUSG00000029101	Rgs12	220	247	119	86	0.987747	0.96631	0.462022	0.279031	0.00720035	-1.0929	down
ENSMUSG00000034973	Dop1a	1068	1132	2286	2541	2.34302	1.9339	3.96888	4.12811	1.27352e-14	1.22417	up
ENSMUSG00000072647	Adam1a	80	81	14	22	0.334535	0.3554	0.052269	0.079734	0.00239917	-2.07309	down
ENSMUSG00000020429	Igfbp1	1383	3348	20521	39676	13.414	34.0769	184.815	340.021	2.89155e-06	3.74794	up
ENSMUSG00000020423	Btg2	239	399	1613	2396	1.28657	2.25445	8.07354	11.4148	3.22308e-19	2.73575	up
ENSMUSG00000025287	Acot9	134	132	257	247	1.1238	1.16846	2.01152	1.84193	0.00256494	1.01472	up
ENSMUSG00000025138	Sirt7	2720	3335	1274	1080	24.663	31.7123	10.4956	8.48204	3.77964e-10	-1.2702	down
ENSMUSG00000025130	P4hb	100295	104658	254831	275709	518.541	567.922	1223.37	1259.47	3.56917e-35	1.46309	up
ENSMUSG00000025137	Pcyt2	34465	33168	14084	11780	283.02	286.955	108.066	86.9795	1.05878e-16	-1.29208	down
ENSMUSG00000032000	Birc3	1037	1041	2472	2537	5.74791	6.04698	12.9078	12.69	6.34497e-20	1.36119	up
ENSMUSG00000024909	Efemp2	135	111	39	48	1.18732	1.0536	0.288235	0.273471	0.00671344	-1.40831	down
ENSMUSG00000023990	Tfeb	654	600	218	241	4.13639	3.99177	1.27247	1.33222	1.55131e-08	-1.35834	down
ENSMUSG00000024427	Spry4	546	550	67	136	1.69832	1.79377	0.193183	0.372539	6.26882e-10	-2.34796	down
ENSMUSG00000024424	Ttc39c	22928	28206	4578	3701	80.9456	104.279	15.3492	11.7158	1.82608e-41	-2.53332	down
ENSMUSG00000060260	Pwwp2b	149	116	36	55	0.789129	0.65549	0.193646	0.237444	0.00658379	-1.45266	down
ENSMUSG00000037664	Cdkn1c	114	72	23	25	0.960525	0.632256	0.226922	0.171048	0.00399432	-1.86004	down
ENSMUSG00000032913	Lrig2	440	467	994	1146	0.922461	1.02871	1.98005	2.17306	3.12581e-11	1.32857	up
ENSMUSG00000004040	Stat3	5840	5273	19365	21978	18.3096	17.3497	57.1642	61.9789	4.08066e-51	1.98669	up
ENSMUSG00000004044	Cavin1	255	223	97	119	1.07977	0.988521	0.37783	0.442435	0.00434462	-1.05516	down
Mus_musculus_newGene_257	Mus_musculus_newGene_257	97	73	204	273	0.785962	0.624468	1.54194	1.96858	7.46624e-05	1.57883	up
ENSMUSG00000039202	Abhd2	3571	3498	8908	10208	7.67998	7.89608	17.7905	19.3989	1.80264e-30	1.52584	up
ENSMUSG00000019437	Tlcd1	3963	3507	1123	1027	22.3534	20.923	5.89898	5.14107	4.76407e-26	-1.70274	down
Mus_musculus_newGene_1044	Mus_musculus_newGene_1044	499	505	30	28	1.45994	1.72832	0.147774	0.131576	6.8157e-33	-4.02122	down
ENSMUSG00000074183	Gsta1	276	486	9	11	4.65444	8.60986	0.141273	0.152882	4.29801e-22	-5.1645	down
ENSMUSG00000058135	Gstm1	106372	116910	11235	9915	1274.05	1470.03	123.213	102.408	3.51434e-114	-3.30701	down
ENSMUSG00000061825	Ces2c	4970	5585	899	760	37.3172	44.0118	6.26511	5.03685	9.43048e-49	-2.5762	down
ENSMUSG00000041974	Spidr	241	194	500	605	1.08567	0.917133	2.09	2.40826	1.19519e-07	1.43616	up
Mus_musculus_newGene_3484	Mus_musculus_newGene_3484	355	255	107	72	1.56603	1.21089	0.419414	0.320055	4.8887e-05	-1.67037	down
ENSMUSG00000056394	Lig1	181	161	75	37	0.861739	0.804166	0.323768	0.15109	0.00582266	-1.51025	down
ENSMUSG00000009281	Rarres2	22089	19980	8598	7710	434.335	411.98	156.579	133.95	8.53556e-19	-1.27294	down
ENSMUSG00000054630	Ugt2b5	85668	75264	26431	26279	682.019	628.892	195.385	184.846	2.03251e-32	-1.51715	down
ENSMUSG00000018339	Gpx3	131	100	318	508	1.21515	0.96722	2.73365	4.16525	1.45468e-07	1.92644	up
ENSMUSG00000021922	Itih4	67120	64269	813531	1118840	321.881	322.587	3667.11	4806.34	2.28978e-122	3.96694	up
ENSMUSG00000033220	Rac2	143	130	285	272	0.71122	0.685617	1.33064	1.16957	0.000571839	1.12205	up
ENSMUSG00000038507	Parp12	1610	1606	3637	3015	7.36772	7.71612	15.46	12.1937	1.67572e-10	1.14305	up
ENSMUSG00000091685	Gm17359	4	5	97	146	0.032419	0.040626	0.736003	1.06866	1.41614e-10	4.84175	up
ENSMUSG00000031489	Adrb3	553	629	332	184	3.09078	3.6991	1.74574	0.930608	0.00346489	-1.0977	down
ENSMUSG00000022389	Tef	18152	15352	1492	1994	63.2859	56.1471	4.9481	6.32553	1.00942e-71	-3.17488	down
ENSMUSG00000022388	Ttll8	21	24	131	174	0.099633	0.136694	0.61466	0.783698	2.94746e-08	2.84909	up
ENSMUSG00000063320	1190007I07Rik	353	400	149	147	7.56093	9.24579	2.98382	2.73414	3.08455e-05	-1.25556	down
ENSMUSG00000000078	Klf6	290	247	541	666	1.01732	0.905173	1.77241	2.06	9.67936e-07	1.25911	up
ENSMUSG00000031150	Ccdc120	56	61	383	383	0.225586	0.267767	1.45312	1.44224	1.92578e-18	2.80266	up
ENSMUSG00000022528	Hes1	834	566	283	228	8.40024	5.97784	2.64487	2.02279	1.11759e-05	-1.35688	down
ENSMUSG00000029718	Pcolce	252	229	64	60	2.34709	2.31208	0.576761	0.488196	8.93596e-07	-1.86237	down
ENSMUSG00000035673	Sbno2	1320	1570	5176	4552	4.65668	5.58995	16.5891	13.8961	4.24417e-25	1.84376	up
ENSMUSG00000020672	Sntg2	573	603	150	116	3.51496	3.90451	0.852045	0.627207	6.89926e-13	-2.04998	down
ENSMUSG00000069917	Hba-a2	819	1777	457	455	21.8651	49.7966	11.3128	10.7239	0.000167419	-1.4219	down
ENSMUSG00000069919	Hba-a1	1228	3006	762	754	25.9791	66.7633	14.9711	14.0815	0.000401631	-1.3951	down
ENSMUSG00000027540	Ptpn1	1412	1426	3795	3527	4.95586	5.25358	12.3716	10.9402	1.97071e-22	1.4604	up
ENSMUSG00000027546	Atp9a	2795	2813	5612	6131	11.4609	12.1128	21.0108	21.6993	1.75669e-18	1.1573	up
ENSMUSG00000022040	Ephx2	43678	46673	20477	18781	317.502	356.102	138.204	120.625	8.40421e-16	-1.10971	down
ENSMUSG00000059060	Rad51b	21	13	245	166	0.140322	0.085943	1.53852	1.00658	4.00288e-12	3.69435	up
ENSMUSG00000026639	Lamb3	152	188	326	318	0.460326	0.597766	0.919552	0.851375	0.00163832	1.01276	up
Mus_musculus_newGene_1944	Mus_musculus_newGene_1944	327	402	1567	1427	2.31707	2.99741	10.7507	9.03174	1.03781e-23	2.13021	up
Mus_musculus_newGene_1940	Mus_musculus_newGene_1940	5	12	117	91	0.107334	0.242694	2.23546	1.65336	3.45404e-07	3.70495	up
ENSMUSG00000028906	Epb41	7270	6990	11379	15902	24.2538	24.5602	34.9252	46.1817	3.70837e-08	1.0242	up
ENSMUSG00000078974	Sec61g	604	562	1275	1121	10.0782	8.7158	17.8544	15.8768	1.62569e-08	1.13325	up
ENSMUSG00000002897	Il17ra	1223	1353	3710	4040	2.33266	2.70945	6.57196	6.8102	1.73579e-28	1.67957	up
ENSMUSG00000040128	Pnrc1	2274	1642	13351	11466	20.4101	15.4649	111.266	90.9267	1.35641e-44	2.76014	up
ENSMUSG00000109061	Gm49320	268	652	149	96	1.37572	3.51534	0.707662	0.434712	0.000408275	-1.81717	down
ENSMUSG00000068220	Lgals1	192	228	72	32	3.55594	4.41894	1.22091	0.509161	0.000442079	-1.91452	down
ENSMUSG00000019850	Tnfaip3	95	196	5337	6729	0.315463	0.709174	16.8458	20.1868	9.47315e-75	5.45908	up
ENSMUSG00000050705	2310061I04Rik	2048	1886	739	706	21.9831	21.703	7.65048	6.9865	1.03189e-15	-1.35171	down
ENSMUSG00000020826	Nos2	2	0	660	438	0.006798	0	2.16145	1.3627	1.88388e-16	9.19866	up
ENSMUSG00000091721	Gimd1	120	160	297	467	1.22409	1.7226	2.86813	4.22855	4.67217e-05	1.53324	up
ENSMUSG00000030122	Ptms	26475	24388	6146	5108	340.829	329.526	73.459	58.0992	1.65826e-39	-2.08112	down
ENSMUSG00000030123	Plxnd1	941	759	321	248	2.01446	1.70513	0.637988	0.467946	2.98588e-08	-1.48258	down
ENSMUSG00000049404	Rarres1	1518	1619	4457	2339	16.9381	18.9619	46.1909	23.068	0.000115998	1.2149	up
ENSMUSG00000026873	Phf19	110	145	32	25	0.432041	0.601445	0.115871	0.085429	0.000200858	-2.06877	down
ENSMUSG00000026879	Gsn	645	652	274	188	3.59228	3.81494	1.41404	0.92397	3.23691e-06	-1.39293	down
ENSMUSG00000089809	Rasgef1b	632	605	1070	1685	3.12065	3.13582	4.9131	7.35849	2.04359e-06	1.24216	up
ENSMUSG00000021065	Fut8	186	161	306	383	0.818894	0.774585	1.33064	1.48761	0.000577969	1.07998	up
ENSMUSG00000021066	Atl1	118	232	489	495	0.336375	0.696636	1.3049	1.25574	6.26091e-05	1.5793	up
ENSMUSG00000021069	Pygl	34031	35516	8924	7184	178.159	195.12	43.3506	33.2247	6.11325e-34	-2.01559	down
ENSMUSG00000032712	Resf1	2246	1551	738	808	6.3136	4.34421	1.85648	2.02352	2.55336e-07	-1.20278	down
ENSMUSG00000029521	Chek2	139	123	18	40	0.897765	0.869253	0.103514	0.273229	0.000593606	-2.09013	down
ENSMUSG00000074277	Phldb3	258	356	134	123	1.48383	2.15343	0.716438	0.622002	0.0015367	-1.16542	down
Mus_musculus_newGene_249	Mus_musculus_newGene_249	1224	1547	3171	3181	1.26002	1.67149	3.03044	2.89266	5.13405e-12	1.28745	up
ENSMUSG00000042349	Ikbke	1497	1828	12098	10361	7.36794	9.48017	54.4739	44.0021	3.25104e-57	2.84872	up
ENSMUSG00000042348	Arl15	480	518	1102	1646	2.14492	2.38876	4.49918	6.43912	5.41762e-10	1.5481	up
ENSMUSG00000024807	Syvn1	7396	9539	17573	17200	33.2079	44.0542	73.4494	69.7768	2.01161e-10	1.12872	up
ENSMUSG00000040451	Sgms1	1110	568	1929	2307	4.47485	2.40678	7.80072	8.9382	5.93092e-06	1.43021	up
ENSMUSG00000026405	C4bp	36951	33740	90073	98248	181.329	174.551	412.26	428.672	2.44923e-35	1.50532	up
ENSMUSG00000047109	Cldn14	326	578	2053	2210	3.64782	6.68224	21.0348	21.8256	5.94003e-16	2.32518	up
Mus_musculus_newGene_2980	Mus_musculus_newGene_2980	4854	3427	1094	657	6.61759	4.58894	1.30978	0.919602	1.51219e-13	-2.14097	down
Mus_musculus_newGene_2982	Mus_musculus_newGene_2982	72	21	734	846	0.16914	0.050444	1.61979	1.77625	1.97475e-19	4.18299	up
Mus_musculus_newGene_2983	Mus_musculus_newGene_2983	1328	1793	3240	3417	3.56442	5.05206	8.0766	8.10637	7.52864e-09	1.18244	up
Mus_musculus_newGene_2986	Mus_musculus_newGene_2986	12	8	963	671	0.032186	0.030764	2.24223	1.61919	2.19339e-47	6.44974	up
ENSMUSG00000064246	Chil1	0	4	4315	3544	0	0.026846	35.2688	26.6293	1.00882e-47	11.0344	up
ENSMUSG00000064247	Plcxd1	152	180	15	24	0.878511	0.895416	0.142927	0.09312	1.67412e-08	-3.00244	down
ENSMUSG00000002910	Arrdc2	822	1096	282	212	5.15941	7.22081	1.64105	1.17112	8.45172e-11	-1.86355	down
ENSMUSG00000010122	Slc47a1	6412	7278	760	645	32.6684	42.4708	3.92613	3.17758	5.23938e-76	-3.1913	down
ENSMUSG00000027412	Lpin3	257	358	616	628	1.11486	1.60411	2.4436	2.36558	8.81329e-05	1.10627	up
ENSMUSG00000004730	Adgre1	157	122	283	391	0.713802	0.582872	1.1964	1.5768	0.000100943	1.36234	up
ENSMUSG00000036885	Arhgef26	3129	2513	9294	8711	8.20825	6.9166	22.6406	20.191	1.92225e-27	1.76858	up
ENSMUSG00000028637	Ccdc30	267	297	76	51	1.9664	2.31968	0.463026	0.310402	3.25757e-07	-2.05549	down
ENSMUSG00000028633	Ctps	258	369	642	725	1.4065	2.11325	3.25661	3.5023	2.0774e-05	1.21301	up
ENSMUSG00000025204	Ndufb8	3342	3881	1675	1573	59.1257	71.8597	25.4192	21.543	5.35896e-10	-1.0611	down
ENSMUSG00000039057	Myo16	0	0	290	563	0	0	0.554127	1.02629	6.88922e-13	11.2634	up
ENSMUSG00000023913	Pla2g7	78	47	284	304	0.548249	0.347816	1.85614	1.89023	4.45286e-09	2.32794	up
ENSMUSG00000023912	Slc25a27	119	140	33	42	0.664565	0.84986	0.167529	0.191533	0.00105829	-1.69925	down
ENSMUSG00000091144	Phf11c	836	791	360	271	3.57095	3.54812	1.42736	1.02016	9.98232e-07	-1.27079	down
ENSMUSG00000032997	Chpf	111	105	257	431	0.560047	0.529593	1.20407	1.90936	4.9477e-06	1.75779	up
ENSMUSG00000054252	Fgfr3	2493	3076	781	637	8.91348	11.933	2.70132	2.0076	9.07487e-19	-1.88039	down
ENSMUSG00000033644	Piwil2	8	3	97	165	0.024051	0.009222	0.268448	0.438553	6.49558e-10	4.66279	up
ENSMUSG00000026249	Serpine2	767	366	159	121	5.12868	2.56649	0.982902	0.711641	6.89084e-06	-1.91663	down
ENSMUSG00000030590	Fam98c	595	595	228	233	7.16008	7.53513	2.45006	2.36611	9.79317e-08	-1.27621	down
ENSMUSG00000034037	Fgd5	279	147	78	59	0.675325	0.373002	0.17556	0.126484	0.00276987	-1.53745	down
ENSMUSG00000060961	Slc4a4	4146	3677	15590	20127	7.73101	7.20138	27.1098	33.3724	3.52326e-44	2.28061	up
ENSMUSG00000005800	Mmp8	2	0	75	88	0.011549	0	0.421542	0.473049	6.18866e-07	6.44139	up
ENSMUSG00000005803	Sqor	12994	10517	4162	4933	107.568	91.2038	31.818	36.003	1.51687e-14	-1.27868	down
ENSMUSG00000005802	Slc30a4	1132	1023	1761	2446	3.06852	2.91955	4.4557	5.94144	8.00105e-07	1.05393	up
ENSMUSG00000031644	Nek1	791	744	1709	1621	2.16586	2.37022	4.47111	4.02459	1.69308e-12	1.21049	up
ENSMUSG00000035342	Lzts2	439	753	165	189	2.56119	4.83041	0.862272	0.904026	3.55795e-06	-1.66442	down
ENSMUSG00000028572	Hook1	6077	5119	10178	12972	16.3096	14.4029	25.3378	30.7291	5.12185e-11	1.13834	up
ENSMUSG00000028573	Fggy	5503	4860	2319	2199	43.7657	40.7588	16.9454	15.2448	1.66687e-13	-1.10402	down
ENSMUSG00000028578	Caap1	353	351	644	703	2.47255	2.58187	4.19471	4.35524	3.28802e-06	1.0273	up
ENSMUSG00000058207	Serpina3k	672053	711981	1433490	1632201	4832.75	5373.65	9571.6	10370.4	6.52397e-22	1.2375	up
ENSMUSG00000024308	Tapbp	4407	4087	9747	7717	24.7254	24.0239	50.8131	38.1493	3.16062e-10	1.1355	up
ENSMUSG00000044033	Ccdc141	1451	1192	408	361	3.09976	2.96826	0.930289	0.870354	5.71047e-15	-1.68632	down
ENSMUSG00000044037	Als2cl	2028	3374	1169	1281	5.94985	10.3434	3.15604	3.29303	0.000147765	-1.053	down
ENSMUSG00000001911	Nfix	5809	5405	2264	2049	16.4386	15.7746	6.44935	5.93937	8.50988e-18	-1.28466	down
ENSMUSG00000024150	Mcfd2	12771	13279	33763	38561	101.55	109.644	259.757	286.878	3.51217e-34	1.56345	up
ENSMUSG00000009418	Nav1	265	191	108	96	0.303512	0.22819	0.115175	0.09773	0.0087436	-1.06499	down
ENSMUSG00000036611	Eepd1	1971	1385	522	634	10.7044	7.89377	2.62965	3.03984	2.07988e-09	-1.44539	down
ENSMUSG00000017390	Aldoc	1436	1156	342	276	7.70444	6.53909	1.73717	1.30015	8.83849e-17	-1.97243	down
ENSMUSG00000002032	Tmem25	5242	5435	809	742	28.6819	31.3885	4.10291	3.56324	4.44186e-72	-2.69036	down
ENSMUSG00000067813	Xkr9	1911	1298	693	603	14.6698	10.4617	4.93932	4.091	1.85676e-06	-1.21166	down
Mus_musculus_newGene_1650	Mus_musculus_newGene_1650	246	173	31	24	0.796789	0.58674	0.093195	0.066859	4.14766e-09	-2.83291	down
ENSMUSG00000067818	Myl9	175	107	34	17	2.28174	1.46067	0.404334	0.192565	0.00018544	-2.36528	down
ENSMUSG00000038503	Mesd	1616	1688	2955	3436	5.32346	5.85291	9.05161	10.0026	2.96304e-11	1.04189	up
ENSMUSG00000062054	Iah1	5218	5303	1770	1791	65.746	70.1599	20.9894	20.3342	2.65876e-28	-1.47099	down
ENSMUSG00000029027	Dffb	242	254	94	98	1.73837	1.95037	0.625928	0.611772	0.000315489	-1.27783	down
Mus_musculus_newGene_3097	Mus_musculus_newGene_3097	78	96	237	213	0.575448	0.726002	1.57303	1.34676	0.000143699	1.46312	up
ENSMUSG00000063904	Dpp3	2838	3480	6510	6947	15.8893	20.1314	33.8714	35.0359	1.8586e-12	1.18085	up
ENSMUSG00000029798	Herc6	914	912	2867	2300	2.83513	2.96848	8.26236	6.30535	1.74413e-16	1.59557	up
ENSMUSG00000029797	Sspo	186	149	34	25	0.175363	0.147495	0.029426	0.020519	1.42889e-06	-2.40911	down
ENSMUSG00000052085	Dock8	3202	2635	506	536	6.0682	5.24083	0.889707	0.896354	4.12304e-42	-2.39307	down
ENSMUSG00000013629	Cad	878	1226	3328	3763	1.84659	2.76122	6.48158	7.04524	6.04942e-18	1.84137	up
ENSMUSG00000037942	Crp	29410	26816	69632	76165	256.65	245.616	564.239	587.271	3.97417e-33	1.46635	up
ENSMUSG00000070305	Mpzl3	577	546	1022	1293	2.58698	2.55059	4.14084	4.9445	6.46476e-08	1.13336	up
ENSMUSG00000021792	Prxl2a	4157	4257	1751	1806	40.954	43.778	15.9898	15.6264	5.99996e-17	-1.15048	down
ENSMUSG00000024678	Ms4a4d	200	135	31	63	1.94854	1.37605	0.278934	0.540337	0.00197487	-1.74605	down
ENSMUSG00000032816	Igdcc4	19	6	1591	2111	0.042608	0.013996	3.50933	4.43363	8.02878e-81	7.30089	up
ENSMUSG00000022853	Ehhadh	20625	20360	9666	7489	102.343	106.032	44.5349	32.8318	1.14826e-10	-1.16099	down
ENSMUSG00000022856	Tmem41a	342	408	725	857	3.80151	4.71212	7.37431	8.25626	9.64046e-07	1.16591	up
ENSMUSG00000040829	Zmynd15	249	174	79	89	1.70898	1.00126	0.403289	0.424078	0.00339681	-1.23907	down
ENSMUSG00000058818	Pirb	144	168	335	415	0.553646	0.680357	1.20202	1.41509	1.26616e-05	1.35413	up
Mus_musculus_newGene_1810	Mus_musculus_newGene_1810	10	17	132	144	0.064214	0.113095	0.804628	0.838133	3.43979e-09	3.44275	up
ENSMUSG00000045954	Cavin2	484	262	151	121	2.33924	1.33047	0.678096	0.514333	0.00141247	-1.35697	down
ENSMUSG00000028980	H6pd	29097	26229	57582	70150	93.8426	88.5968	172.063	199.815	5.47069e-19	1.29751	up
ENSMUSG00000046753	Ccdc66	208	305	514	556	0.797573	1.10989	1.6555	1.70418	0.000189634	1.1495	up
ENSMUSG00000042453	Reln	1742	843	209	388	2.20193	1.11829	0.244728	0.432887	7.06159e-07	-2.02474	down
ENSMUSG00000075551	Cyp3a41a	896	779	1	0	6.42891	5.8688	0.006653	0	3.22911e-12	-10.6169	down
ENSMUSG00000078606	Gvin2	905	493	1710	2175	1.48587	0.848908	2.60721	3.15614	2.58687e-07	1.56764	up
ENSMUSG00000001891	Ugp2	50812	36726	8200	8970	287.372	219.638	46.086	47.0904	4.54867e-36	-2.25675	down
ENSMUSG00000024539	Ptpn2	886	667	1906	1763	7.19144	5.98554	14.2712	12.9719	2.08786e-10	1.33529	up
ENSMUSG00000067225	Cyp2c54	32070	21138	689	633	265.606	183.745	5.29846	4.63154	7.90943e-135	-5.23487	down
ENSMUSG00000056749	Nfil3	456	548	5590	5098	3.32198	4.19823	37.8912	32.8832	5.14722e-90	3.50444	up
ENSMUSG00000024254	Abcg8	11959	7945	1478	2151	52.8724	37.1442	6.29817	8.71714	5.49434e-22	-2.36509	down
ENSMUSG00000015850	Adamtsl4	162	149	51	74	0.589361	0.584013	0.173421	0.236475	0.00951201	-1.22617	down
ENSMUSG00000015854	Cd5l	1424	943	2197	2276	10.3391	7.18452	14.8154	14.6064	1.86181e-05	1.01262	up
Mus_musculus_newGene_658	Mus_musculus_newGene_658	0	0	98	333	0	0	0.343779	1.1619	6.8668e-10	10.2729	up
ENSMUSG00000021804	Rgr	159	124	19	10	0.497006	0.407007	0.053102	0.025802	1.74815e-07	-3.18802	down
ENSMUSG00000036155	Mgat5	378	363	1275	1406	0.661476	0.66667	2.0762	2.19281	3.79128e-26	1.94648	up
ENSMUSG00000030659	Nucb2	109	172	4756	5068	0.857246	1.56162	38.7175	39.3208	1.77206e-118	5.21684	up
ENSMUSG00000037685	Atp8a1	270	210	119	98	0.498424	0.397513	0.199042	0.156317	0.00747354	-1.04952	down
ENSMUSG00000076437	Selenoh	227	192	79	65	4.63401	4.12855	1.48907	1.12352	0.000420048	-1.4457	down
ENSMUSG00000048756	Foxo3	4497	3839	1474	2083	10.0612	8.90592	3.03555	4.01834	4.63252e-08	-1.13966	down
ENSMUSG00000031216	Stard8	478	349	113	124	1.42348	1.08625	0.349358	0.326151	1.53583e-07	-1.70983	down
ENSMUSG00000022641	Bbx	663	650	1044	1498	1.16106	1.19945	1.73437	2.34134	1.22782e-05	1.04104	up
ENSMUSG00000029616	Erp29	2076	2493	4928	4946	6.2001	7.90329	13.6873	12.7802	3.76647e-13	1.20271	up
ENSMUSG00000038286	Bphl	8045	7985	2780	2250	95.0675	99.1841	30.4815	23.4626	2.80712e-20	-1.57731	down
ENSMUSG00000052271	Bhlha15	83	295	3182	2635	0.348306	1.30825	12.5074	9.85268	5.74614e-06	4.03089	up
ENSMUSG00000027429	Sec23b	3719	5088	8670	8629	20.2301	29.0241	43.6745	42.1526	8.17234e-08	1.06414	up
ENSMUSG00000072494	Ppp1r3e	265	226	89	112	2.06107	1.81412	0.64391	0.759855	0.0013288	-1.1978	down
ENSMUSG00000024736	Tmem132a	89	149	38	37	0.344338	0.606789	0.133776	0.123968	0.00749886	-1.5768	down
ENSMUSG00000027281	Slx4ip	213	211	396	490	0.709705	0.650303	1.11567	1.3893	3.27905e-05	1.15299	up
ENSMUSG00000026489	Coq8a	13603	16992	3584	3221	50.0286	66.9978	12.2839	10.5043	2.47125e-32	-2.07661	down
ENSMUSG00000004460	Dnajb11	5604	6235	22055	25205	42.5547	49.8864	157.92	171.373	3.12675e-50	2.08688	up
ENSMUSG00000043207	Zmpste24	4676	4499	8618	11048	20.2331	20.4474	34.6257	42.1615	2.15856e-13	1.18928	up
ENSMUSG00000034456	Uroc1	28403	28945	8313	8020	122.393	130.612	33.4414	31.0762	5.65953e-45	-1.71944	down
ENSMUSG00000034450	Gulo	32660	29314	9310	8077	213.475	201.103	56.4995	46.6455	4.31039e-31	-1.73894	down
ENSMUSG00000017740	Slc12a5	99	119	35	19	0.41948	0.305197	0.078077	0.041165	0.00244548	-1.91646	down
ENSMUSG00000008398	Elk3	360	191	105	87	1.26257	0.701529	0.339503	0.269037	0.00218107	-1.42268	down
ENSMUSG00000000594	Gm2a	8351	9545	2191	1982	29.9284	35.9061	7.29167	6.27607	9.42401e-37	-2.00798	down
Mus_musculus_newGene_3198	Mus_musculus_newGene_3198	177	163	40	15	3.0041	2.9052	0.630643	0.221142	3.71953e-05	-2.52632	down
Mus_musculus_newGene_848	Mus_musculus_newGene_848	488	743	203	211	1.28794	2.06499	0.50394	0.494694	3.39779e-06	-1.48312	down
Mus_musculus_newGene_3194	Mus_musculus_newGene_3194	52	53	688	603	0.148758	0.158613	1.82986	1.52766	1.54563e-37	3.71377	up
ENSMUSG00000047228	A2ml1	508	569	2237	1952	1.59888	1.87939	6.54333	5.43369	3.95561e-27	2.05278	up
ENSMUSG00000047227	Gm527	42	41	172	126	0.441484	0.432194	1.70141	1.123	8.3388e-05	1.94008	up
ENSMUSG00000013275	Slc41a1	449	529	1114	1021	1.41117	1.74822	3.2561	2.84075	1.78302e-08	1.21857	up
ENSMUSG00000054708	Ankrd24	280	357	168	117	1.37763	1.92336	0.795925	0.568842	0.00605699	-1.06572	down
ENSMUSG00000054702	Ap1s3	37	31	93	99	0.189785	0.164212	0.443215	0.448718	0.00475304	1.58991	up
ENSMUSG00000033538	Casp4	43	13	124	91	0.443243	0.126818	1.17899	0.815336	0.00659836	2.04295	up
ENSMUSG00000038618	Rassf7	1184	1348	524	539	13.9592	15.742	5.41806	5.24954	3.70872e-09	-1.16113	down
ENSMUSG00000023495	Pcbp4	1107	1234	479	595	8.8712	10.7384	3.36909	4.07341	1.51896e-06	-1.03516	down
ENSMUSG00000030378	Sult2a8	94287	73507	3245	2075	714.518	578.977	21.6132	13.4205	6.3402e-94	-4.87974	down
ENSMUSG00000031392	Irak1	3398	3251	5980	7042	13.9041	13.8831	25.421	25.1915	2.07995e-13	1.0602	up
ENSMUSG00000037085	Trmt12	127	245	391	427	0.421109	0.853382	1.2029	1.25209	0.00278751	1.22394	up
ENSMUSG00000031024	Denn2b	529	745	3344	4322	1.91777	2.96569	11.6094	15.0502	1.0168e-31	2.67595	up
ENSMUSG00000029407	Uso1	8934	8559	19180	21259	33.9189	34.0854	67.6395	71.3216	2.58465e-26	1.30017	up
ENSMUSG00000029405	G3bp2	3590	3591	6457	7877	13.276	13.7286	23.939	27.6725	7.6851e-13	1.08691	up
ENSMUSG00000042797	Aqp11	2201	2486	738	756	8.79045	10.4943	2.71048	2.69763	6.99796e-20	-1.5584	down
ENSMUSG00000024386	Proc	36706	35213	15746	13867	356.515	356.813	141.64	118.779	6.59645e-17	-1.18606	down
ENSMUSG00000024962	Vegfb	1117	977	265	233	13.4343	12.3559	2.95678	2.48526	5.93579e-19	-1.97768	down
ENSMUSG00000001995	Sipa1l2	438	561	118	140	0.967512	1.30089	0.241424	0.283126	1.07557e-09	-1.86435	down
ENSMUSG00000005677	Nr1i3	11630	8834	3228	3250	77.7239	62.8813	22.8412	21.3234	1.54206e-19	-1.5655	down
ENSMUSG00000005674	Tomm40l	11523	8663	2754	2527	36.6075	28.5797	8.09559	7.01303	6.97721e-24	-1.83929	down
ENSMUSG00000005672	Kit	329	122	80	57	0.926333	0.359518	0.209321	0.140344	0.00780569	-1.61688	down
ENSMUSG00000026520	Pycr2	161	289	533	490	1.50126	2.83759	4.62491	4.05123	0.000600283	1.27446	up
ENSMUSG00000094152	Slc6a16	94	74	16	4	0.481741	0.399011	0.072549	0.014658	0.00061936	-2.96594	down
ENSMUSG00000094156	Sult2a7	153	107	41	18	2.83247	2.09367	0.698432	0.293566	0.00175981	-2.03727	down
ENSMUSG00000050896	Rtn4rl2	7	10	276	435	0.069259	0.117481	2.92652	4.40955	3.07058e-25	5.47219	up
Mus_musculus_newGene_443	Mus_musculus_newGene_443	7	12	141	190	0.05145	0.094356	1.05678	1.35686	1.53258e-12	4.20971	up
ENSMUSG00000045538	Ddx28	651	753	3598	4324	4.25528	5.16345	21.8465	24.982	1.74727e-49	2.58535	up
ENSMUSG00000041096	Tspyl2	543	841	1559	1629	3.06131	5.08352	8.18005	8.07982	8.64287e-07	1.29267	up
ENSMUSG00000000385	Tmprss2	213	268	596	536	0.994147	1.31631	2.58791	2.24399	1.39702e-06	1.32686	up
ENSMUSG00000066278	Vps37b	630	670	1329	1333	3.69501	4.12435	7.23629	6.90306	3.55989e-10	1.12578	up
ENSMUSG00000022035	Ccdc25	2094	2014	3904	4377	13.8843	14.016	24.0413	25.6469	6.68673e-15	1.10241	up
ENSMUSG00000022032	Scara5	73	112	9182	9712	0.281413	0.456731	33.2976	33.5331	1.43681e-236	6.76415	up
ENSMUSG00000055632	Hmcn2	101	171	40	35	0.094856	0.168965	0.034786	0.02886	0.00194106	-1.76844	down
Mus_musculus_newGene_2637	Mus_musculus_newGene_2637	64	49	202	238	0.293771	0.239997	0.886269	0.960086	3.65759e-07	2.05285	up
ENSMUSG00000039156	Stim2	2614	1745	861	996	7.89448	5.49185	2.39364	2.63882	2.74954e-06	-1.13793	down
ENSMUSG00000039157	Fam102a	2437	2095	974	1037	8.56664	7.72442	3.2007	3.21062	1.75155e-10	-1.0798	down
ENSMUSG00000049092	Gpr137c	75	71	13	16	0.229989	0.223247	0.033552	0.039476	0.00152193	-2.24124	down
ENSMUSG00000052911	Lamb2	272	175	83	75	0.725225	0.48027	0.201123	0.171187	0.00134655	-1.40434	down
ENSMUSG00000032898	Fbxo21	8765	9513	3368	3549	33.1129	37.8438	11.799	11.8454	1.97076e-22	-1.31089	down
ENSMUSG00000020048	Hsp90b1	56998	53399	169393	208579	298.446	293.46	823.569	964.954	2.18784e-39	1.8656	up
ENSMUSG00000020044	Timp3	958	560	277	139	3.00088	1.83822	0.803556	0.384221	3.97682e-05	-1.76394	down
ENSMUSG00000030946	Lhpp	2893	4229	918	1633	26.6659	40.8511	7.80992	13.2507	5.91462e-06	-1.39855	down
ENSMUSG00000033769	Exoc6b	322	300	558	784	0.873592	0.855485	1.40695	1.88226	9.35948e-06	1.19797	up
ENSMUSG00000033768	Nrxn2	114	220	18	33	0.25458	0.510716	0.040857	0.122548	2.13111e-05	-2.62911	down
ENSMUSG00000033767	Tmem131l	3022	2599	283	357	8.20006	7.56643	0.705495	0.853402	1.38521e-57	-3.04398	down
ENSMUSG00000072214	Septin5	46	59	462	596	0.182158	0.38625	1.86427	2.26365	6.56157e-26	3.42092	up
ENSMUSG00000037440	Vnn1	971	1245	3800	2641	5.94382	7.99795	21.5984	14.2836	8.76732e-11	1.6344	up
ENSMUSG00000062563	Cys1	427	793	20	25	3.87568	7.62856	0.215536	0.179726	3.35557e-26	-4.67445	down
ENSMUSG00000037447	Arid5a	81	80	514	511	0.319139	0.264696	2.37174	1.91159	3.35966e-23	2.76283	up
ENSMUSG00000030498	Gas2	3447	3759	1085	1069	19.777	22.7717	5.94913	5.51466	4.73089e-27	-1.65041	down
ENSMUSG00000030237	Slco1a4	6236	6591	301	303	26.5635	29.5055	1.12924	1.1834	3.90561e-183	-4.31684	down
ENSMUSG00000031725	Ces1f	30032	27473	172	203	231.174	221.844	1.22195	1.37551	0	-7.16929	down
ENSMUSG00000049532	Sall2	228	325	65	77	0.653507	1.05648	0.173098	0.208102	3.24222e-06	-1.87325	down
ENSMUSG00000022371	Col14a1	1293	709	184	296	4.67105	2.58631	0.537496	0.738019	8.7629e-08	-1.96976	down
ENSMUSG00000022372	Sla	65	40	149	194	0.323131	0.206406	0.749927	0.969388	0.000218897	1.79956	up
ENSMUSG00000034807	Colgalt1	3086	3393	9608	10273	14.2309	16.422	41.1453	41.8616	2.20193e-36	1.70829	up
Mus_musculus_newGene_1411	Mus_musculus_newGene_1411	41	31	341	585	0.206799	0.148854	1.76379	2.79323	1.96355e-20	3.77201	up
Mus_musculus_newGene_1410	Mus_musculus_newGene_1410	32	42	193	316	0.170667	0.235977	0.968406	1.50962	4.15108e-10	2.86709	up
ENSMUSG00000032403	2300009A05Rik	503	426	210	188	12.4874	11.1017	4.8319	4.10781	6.89208e-05	-1.12851	down
ENSMUSG00000079550	Mpp4	132	165	25	21	0.65796	0.855154	0.110892	0.089399	8.68138e-07	-2.59859	down
ENSMUSG00000050663	Trhde	111	95	12	4	0.286153	0.221316	0.024585	0.007741	2.86519e-06	-3.58598	down
ENSMUSG00000027048	Abcb11	51400	52654	11522	11702	155.368	167.05	32.3372	31.2493	2.04704e-72	-2.0718	down
ENSMUSG00000040690	Col16a1	131	102	39	34	0.382337	0.302362	0.101448	0.083276	0.00375659	-1.57932	down
ENSMUSG00000040699	Limd2	1028	766	207	154	5.26237	4.09125	1.00488	0.723775	1.54878e-14	-2.21584	down
Mus_musculus_newGene_3831	Mus_musculus_newGene_3831	584	992	1962	2706	1.29434	2.34262	4.17934	5.65386	3.09286e-08	1.65133	up
ENSMUSG00000032042	Srpr	13517	14182	28479	32467	66.7999	73.5982	130.687	141.77	4.46949e-21	1.22792	up
ENSMUSG00000026315	Serpinb8	300	167	53	25	1.04784	0.565583	0.156068	0.105565	1.3664e-05	-2.47849	down
ENSMUSG00000078680	Mup10	49176	38525	9008	16587	784.688	645.203	133.453	233.853	4.20029e-10	-1.69038	down
ENSMUSG00000016503	Gtf3a	762	632	323	316	8.13631	7.05745	3.21739	3.02404	1.81862e-05	-1.03175	down
ENSMUSG00000053886	Sh2d4a	527	793	301	203	2.86656	4.69732	1.5659	1.01774	0.000304234	-1.29497	down
ENSMUSG00000017677	Wsb1	828	696	2275	2785	5.6183	4.98152	14.462	16.2254	1.20499e-22	1.82207	up
ENSMUSG00000017679	Ttpal	1008	1114	2479	3445	4.1874	4.18721	8.08773	10.7209	3.48566e-14	1.56864	up
ENSMUSG00000037606	Osbpl5	248	305	32	32	0.920859	1.19379	0.108049	0.101747	1.33198e-13	-3.0204	down
ENSMUSG00000079057	Cyp4v3	35129	36165	17198	15957	136.454	147.442	62.0276	54.7645	1.59699e-14	-1.01161	down
ENSMUSG00000023224	Serping1	46846	46831	103068	102584	392.059	411.34	801.023	758.351	1.01068e-26	1.2267	up
ENSMUSG00000054827	Cyp2c50	62457	45786	2514	2119	510.197	392.636	19.0993	15.3299	3.43859e-120	-4.44978	down
ENSMUSG00000073016	Uprt	48	22	95	214	0.30243	0.143751	0.564616	1.21039	0.0008278	2.22928	up
ENSMUSG00000038121	Fam210a	8322	6110	2335	3519	13.0795	10.0035	3.41429	4.97879	5.22367e-07	-1.21256	down
ENSMUSG00000014592	Camta1	212	209	78	92	1.30095	1.2976	0.45315	0.488525	0.00158435	-1.21776	down
ENSMUSG00000014599	Csf1	454	331	901	869	1.66008	1.31779	3.33496	3.0498	2.81755e-07	1.26755	up
Mus_musculus_newGene_2407	Mus_musculus_newGene_2407	105	110	176	267	0.556451	0.60728	0.86474	1.24809	0.00605476	1.13004	up
ENSMUSG00000028127	Abcd3	49104	40260	18725	21707	209.182	179.922	73.711	81.3096	1.53191e-11	-1.05251	down
ENSMUSG00000028128	F3	341	309	96	110	2.69216	2.55744	0.697162	0.762893	1.29157e-06	-1.56642	down
ENSMUSG00000032177	Pde4a	242	305	61	73	0.898908	1.13199	0.220332	0.240418	3.8267e-07	-1.94043	down
ENSMUSG00000060579	Fhit	159	134	350	315	2.6893	2.41879	5.51113	4.78603	5.29993e-05	1.27686	up
ENSMUSG00000068762	Gstm6	8082	8032	1215	1108	104.64	110.247	14.4276	12.6863	3.26586e-81	-2.70098	down
ENSMUSG00000022957	Itsn1	1070	1223	2668	2677	3.07005	3.6991	7.30268	6.59634	2.25855e-15	1.31227	up
ENSMUSG00000022951	Rcan1	1308	1325	3264	4313	8.7055	9.27765	20.3839	25.6084	7.45454e-19	1.61359	up
ENSMUSG00000022952	Runx1	27	4	298	225	0.070597	0.010419	0.83086	0.593771	1.84778e-09	4.17957	up
ENSMUSG00000027203	Dut	453	389	102	96	5.32583	4.63371	1.04087	1.06842	4.89332e-11	-1.99465	down
ENSMUSG00000031886	Ces2e	11243	12923	3341	4164	80.7516	90.9695	20.8216	25.1979	1.18823e-21	-1.59853	down
ENSMUSG00000074521	Gm14327	255	214	481	674	2.58962	2.28364	4.55218	6.07078	1.69645e-06	1.38946	up
ENSMUSG00000034108	Ccs	7503	8285	3029	2741	108.008	125.099	39.9956	34.5109	1.01443e-18	-1.35944	down
ENSMUSG00000029311	Hsd17b11	11742	8894	4084	4025	95.0469	75.5747	30.702	28.7523	1.04295e-12	-1.25332	down
ENSMUSG00000029314	Gpat3	115	154	573	1265	0.632808	0.950609	2.91414	5.66169	8.20335e-13	2.85347	up
ENSMUSG00000007476	Lrrc8a	959	919	1867	2183	3.30822	3.3145	5.95759	6.6312	1.11006e-12	1.19929	up
ENSMUSG00000035769	Xylb	14077	12333	5964	5224	61.2921	56.3305	25.1118	20.0815	2.90605e-13	-1.14439	down
ENSMUSG00000051817	Sox12	439	349	82	99	1.45694	1.21602	0.252099	0.288077	5.57557e-10	-2.03049	down
ENSMUSG00000061959	Ces1e	9442	8929	709	672	71.6657	70.8012	4.81394	4.34173	4.43662e-155	-3.64055	down
Mus_musculus_newGene_3115	Mus_musculus_newGene_3115	322	369	680	734	0.625455	0.746695	1.32556	1.44761	1.04361e-06	1.1235	up
ENSMUSG00000047735	Samd9l	1063	984	2169	1663	2.94797	2.86538	5.58675	4.07756	4.03773e-06	1.00054	up
ENSMUSG00000115232	Gm49378	24	87	274	384	0.10431	0.411016	1.14569	1.52984	9.75794e-06	2.64874	up
Mus_musculus_newGene_2930	Mus_musculus_newGene_2930	121	105	222	310	0.893073	0.815306	1.52287	2.0255	0.00036246	1.32421	up
ENSMUSG00000028527	Ak4	9984	5452	1816	2447	34.6504	19.7596	5.772	7.57456	7.44164e-10	-1.76387	down
ENSMUSG00000025735	Rhbdl1	155	147	26	23	1.43113	1.42222	0.215535	0.183934	4.97024e-07	-2.53025	down
ENSMUSG00000002324	Rec8	172	170	69	35	1.15904	1.20734	0.429718	0.205895	0.00264026	-1.61823	down
ENSMUSG00000064294	Aox3	51901	48777	6180	2249	167.224	165.586	18.5798	6.5124	2.6885e-06	-3.47385	down
ENSMUSG00000038695	Josd2	1443	1900	842	605	18.7304	26.0528	11.1804	7.62074	3.80621e-05	-1.11376	down
ENSMUSG00000001672	Marveld3	57	47	402	442	0.360373	0.312929	2.36025	2.46605	2.76469e-22	3.11261	up
ENSMUSG00000020946	Gosr2	3314	3886	7846	8632	15.071	18.6179	33.1705	34.6665	1.22041e-16	1.28442	up
ENSMUSG00000020941	Map3k14	172	203	676	689	0.597867	0.741374	2.1836	2.12015	1.38853e-15	1.955	up
ENSMUSG00000072572	Slc39a2	110	104	25	15	0.695741	0.687168	0.142606	0.083321	0.000195614	-2.32252	down
ENSMUSG00000030042	Pole4	995	1096	1998	2077	8.34179	9.63353	15.5074	15.3397	2.05449e-10	1.05372	up
ENSMUSG00000019590	Cyb561	354	419	3572	3856	1.9138	2.42849	18.8679	19.386	4.15189e-87	3.35476	up
ENSMUSG00000029153	Ociad2	2414	2210	411	355	13.9795	13.4354	2.20854	1.81349	5.55711e-42	-2.49944	down
ENSMUSG00000025815	Dhtkd1	5424	5222	1289	1481	14.64	14.7932	3.23033	3.5309	1.11996e-38	-1.85155	down
ENSMUSG00000025813	Homer2	3323	2635	897	1039	8.60865	7.26279	2.78284	2.81373	2.95492e-16	-1.52977	down
ENSMUSG00000022450	Ndufa6	4175	4624	1771	1228	105.76	122.963	41.6282	27.6918	1.88957e-10	-1.4569	down
ENSMUSG00000069170	Adgrv1	138	125	13	5	1.28203	1.2263	0.009053	0.003289	3.15337e-08	-3.77005	down
ENSMUSG00000028689	Ccdc163	326	275	142	121	4.65201	4.15771	1.75406	1.54519	0.00137515	-1.09737	down
ENSMUSG00000049878	Rlf	1338	1020	2961	2996	3.0863	2.5287	6.38069	6.26713	2.09702e-14	1.43082	up
ENSMUSG00000029482	Aacs	3883	5396	1333	744	17.7287	25.863	5.64838	3.00063	2.46656e-11	-2.06247	down
ENSMUSG00000020163	Uqcr11	1592	1853	769	597	52.9071	64.617	23.7149	17.5061	5.44121e-08	-1.24039	down
ENSMUSG00000028354	Fmn2	44	37	159	101	0.099822	0.088366	0.33856	0.203053	0.0012265	1.78093	up
ENSMUSG00000028358	Zfp618	754	1064	103	69	1.26267	1.87065	0.159794	0.115285	7.92226e-24	-3.30809	down
ENSMUSG00000028359	Orm3	188	122	1495	1615	3.58482	2.44881	26.5575	27.289	1.45753e-43	3.42014	up
ENSMUSG00000087141	Plcxd2	5054	4954	12631	14913	10.4697	10.7701	24.2969	27.2972	6.99131e-30	1.55084	up
ENSMUSG00000032038	St3gal4	3731	4528	9616	8628	27.5098	34.7722	73.0376	64.286	1.18325e-12	1.23565	up
ENSMUSG00000031503	Col4a2	680	557	2141	1955	1.5589	1.33871	4.55883	3.96106	8.80882e-22	1.82192	up
ENSMUSG00000004098	Col5a3	3157	4262	1753	949	7.62985	10.8115	3.93341	2.02584	2.5515e-05	-1.35962	down
ENSMUSG00000070704	Ugt2b36	61629	51012	10502	8773	486.871	423.596	77.6437	61.5804	7.59506e-48	-2.45119	down
Mus_musculus_newGene_229	Mus_musculus_newGene_229	0	0	415	550	0	0	2.27143	2.98528	1.0307e-13	11.4459	up
ENSMUSG00000041012	Cmtm8	2922	2428	1240	1182	40.6118	35.4185	16.0008	14.5181	2.41719e-09	-1.04936	down
ENSMUSG00000090175	Ugt1a9	15038	14275	5679	3684	101.568	101.193	35.6137	21.9817	2.32731e-11	-1.5486	down
Mus_musculus_newGene_3325	Mus_musculus_newGene_3325	4433	4980	1417	1149	11.0906	11.5092	3.06898	2.93872	1.45378e-21	-1.78121	down
Mus_musculus_newGene_3321	Mus_musculus_newGene_3321	3570	3593	402	298	15.3992	16.0906	1.45588	1.05466	1.69488e-57	-3.25979	down
Mus_musculus_newGene_3328	Mus_musculus_newGene_3328	3059	2433	131	114	23.0737	19.2821	1.01278	0.833884	3.06758e-93	-4.39169	down
ENSMUSG00000006585	Cdt1	181	245	72	73	1.22103	1.7312	0.451052	0.433112	0.000492051	-1.46472	down
ENSMUSG00000117819	Gm50253	863	871	432	333	2.54617	2.69613	1.18223	0.867933	1.37313e-05	-1.08551	down
ENSMUSG00000017344	Vtn	153482	155021	288386	295153	1301.77	1379.99	2271.17	2211.85	4.97327e-19	1.01139	up
ENSMUSG00000061028	Clasrp	594	801	384	251	3.94952	5.67804	2.3613	1.50448	0.00233063	-1.04027	down
ENSMUSG00000021978	Extl3	1701	1647	3303	3908	4.2055	4.27696	7.58891	8.54147	9.45696e-15	1.19724	up
ENSMUSG00000036570	Fxyd1	5800	6406	3050	2568	152.141	176.724	74.5034	59.5192	4.00821e-09	-1.02582	down
ENSMUSG00000018830	Myh11	413	208	79	46	0.969949	0.507118	0.164268	0.09003	1.65658e-05	-2.21038	down
ENSMUSG00000038085	Cnbd2	100	98	212	230	0.717531	0.739468	1.58112	1.65019	0.000538887	1.24991	up
ENSMUSG00000027983	Cyp2u1	2915	3000	777	728	11.4127	11.3901	2.64386	2.46405	7.46459e-33	-1.88191	down
ENSMUSG00000027984	Hadh	15574	15139	7613	6220	128.769	131.375	58.4427	45.4333	2.23984e-10	-1.05582	down
ENSMUSG00000090231	Cfb	75080	67982	245277	218614	427.64	404.244	1283.26	1087.51	1.36864e-37	1.79148	up
ENSMUSG00000029727	Cyp3a13	10946	9010	20609	25842	54.7731	47.317	95.7542	114.255	1.19158e-14	1.30956	up
ENSMUSG00000029722	Agfg2	2383	2223	848	825	12.2991	12.0514	4.06864	3.75554	9.16289e-18	-1.36814	down
ENSMUSG00000029720	Gm20605	1195	1334	619	308	3.95742	4.63682	1.90233	0.900313	0.000175316	-1.34833	down
ENSMUSG00000032489	Kif9	34	52	151	159	0.15647	0.26233	0.70803	0.723691	7.78761e-05	1.93921	up
ENSMUSG00000032484	Ngp	2	0	84	133	0.017834	0	0.94031	1.42027	5.2951e-08	6.85041	up
ENSMUSG00000032482	Cspg5	117	164	29	31	0.404136	0.555329	0.105264	0.118119	5.97097e-05	-2.13819	down
ENSMUSG00000035686	Thrsp	47677	37414	957	899	552.251	454.859	10.2915	9.1921	3.09355e-243	-5.4242	down
ENSMUSG00000042104	Uggt2	174	148	399	414	0.398561	0.355183	0.84949	0.837175	4.68575e-07	1.42887	up
ENSMUSG00000020642	Rnf144a	93	65	789	975	0.265056	0.194976	2.15223	2.54319	3.3543e-37	3.57219	up
ENSMUSG00000020649	Rrm2	292	578	78	57	1.96052	4.09933	0.492181	0.337074	1.1837e-08	-2.59694	down
ENSMUSG00000027510	Rbm38	267	198	74	83	2.30238	1.86465	0.572286	0.607884	0.000225084	-1.47364	down
ENSMUSG00000027514	Zbp1	206	214	5476	3358	2.08	2.31939	45.4365	25.9114	2.02358e-64	4.49262	up
ENSMUSG00000040613	Apobec1	701	686	1390	1359	5.46941	5.50408	10.9753	10.229	6.58548e-10	1.07953	up
ENSMUSG00000040612	Ildr2	1743	1551	6012	5324	3.15629	2.94628	10.0842	8.55154	2.41928e-32	1.87747	up
ENSMUSG00000026390	Marco	60	294	3281	3771	0.457129	2.36377	23.4035	25.6028	6.67944e-05	4.39776	up
Mus_musculus_newGene_1916	Mus_musculus_newGene_1916	122	129	302	278	0.98988	1.11405	2.34377	2.09408	6.55842e-05	1.3012	up
Mus_musculus_newGene_1917	Mus_musculus_newGene_1917	83	92	258	233	0.60358	0.735074	1.74864	1.56692	1.25465e-05	1.58119	up
Mus_musculus_newGene_385	Mus_musculus_newGene_385	15	15	145	153	0.047509	0.049094	0.476708	0.53218	1.47229e-10	3.40387	up
Mus_musculus_newGene_384	Mus_musculus_newGene_384	3	15	199	198	0.039975	0.055315	0.752576	0.724551	5.89367e-12	4.5504	up
Mus_musculus_newGene_387	Mus_musculus_newGene_387	233	213	106	71	2.82474	2.61586	1.26747	0.800056	0.00375774	-1.23632	down
ENSMUSG00000000753	Serpinf1	42808	43975	12927	12791	384.963	415.341	97.1123	109.382	7.02664e-45	-1.66248	down
Mus_musculus_newGene_3429	Mus_musculus_newGene_3429	127	143	36	58	0.58473	0.693981	0.1515	0.234431	0.00669153	-1.43569	down
ENSMUSG00000056978	Hamp2	1207	958	56	48	42.3334	35.3164	1.79043	1.46732	1.69798e-54	-4.28507	down
ENSMUSG00000056973	Ces1d	53468	31483	228	224	394.651	243.894	1.56222	1.46051	1.69161e-205	-7.4583	down
ENSMUSG00000036904	Fzd8	915	1403	290	362	2.26498	3.64564	0.66507	0.791849	2.03913e-09	-1.74314	down
ENSMUSG00000031833	Mast3	3539	5172	1029	828	10.9937	16.6576	3.0061	2.20383	1.7347e-18	-2.13758	down
ENSMUSG00000039217	Il18	693	640	277	182	11.9841	11.5721	4.37009	2.72506	3.34024e-06	-1.44073	down
ENSMUSG00000060063	Alox5ap	64	41	139	169	0.755993	0.498186	1.51739	1.76282	0.000796686	1.64488	up
ENSMUSG00000035919	Bbs9	222	228	854	1098	0.953936	1.01519	3.44045	4.20083	2.27527e-21	2.20598	up
ENSMUSG00000039967	Zfp292	1296	1321	2443	2707	1.91958	2.05245	3.35986	3.54165	2.54534e-12	1.06748	up
ENSMUSG00000019866	Crybg1	1104	1259	3557	4058	2.39562	2.87109	7.09868	8.00925	1.25941e-27	1.77796	up
ENSMUSG00000054414	Slc30a7	1885	1949	3896	4328	3.09112	3.35453	5.93154	6.26968	5.94738e-17	1.19168	up
ENSMUSG00000054417	Cyp3a44	2837	674	0	0	21.3875	5.33215	0	0	2.99672e-08	-13.1199	down
ENSMUSG00000033400	Agl	4655	3641	1900	1804	8.77484	6.52552	2.92744	2.65954	4.01214e-09	-1.06887	down
ENSMUSG00000020873	Slc35b1	2864	3162	9195	8511	30.3841	35.5665	89.9393	78.8586	5.62715e-29	1.64748	up
ENSMUSG00000030170	Wnt5b	172	195	437	347	1.16924	1.41422	2.82679	2.13613	0.000166005	1.18924	up
ENSMUSG00000030172	Erc1	2015	1802	3500	4629	3.45637	3.27899	5.9932	7.04906	2.07045e-10	1.18011	up
ENSMUSG00000031805	Jak3	504	423	1904	1785	1.85477	1.63609	6.52461	5.8155	6.23623e-29	2.08662	up
ENSMUSG00000038764	Ptpn3	2597	2700	4957	5496	6.36025	7.04097	11.4324	12.3985	1.07225e-14	1.07134	up
ENSMUSG00000038768	9130409I23Rik	1096	1406	104	49	8.53787	11.4993	0.752499	0.332909	2.26592e-27	-3.93372	down
ENSMUSG00000046324	Ermp1	1483	1658	4233	4589	3.10728	3.64502	8.23607	8.4965	9.78703e-26	1.58037	up
ENSMUSG00000048782	Insc	494	607	2101	2533	3.56638	4.45632	15.0888	16.7666	2.20472e-27	2.16208	up
ENSMUSG00000048439	Nupl2	171	271	446	515	0.867618	1.44194	2.09758	2.30758	0.000402998	1.20815	up
ENSMUSG00000046997	Spsb4	153	249	44	58	0.82911	1.41769	0.219085	0.27734	0.000121545	-1.89242	down
ENSMUSG00000035783	Acta2	447	265	43	15	3.26642	2.02078	0.307235	0.096163	3.34608e-10	-3.51278	down
ENSMUSG00000027495	Fam210b	4889	5379	9307	11211	19.9903	23.0878	35.3396	40.5058	2.19336e-12	1.08797	up
ENSMUSG00000027490	E2f1	141	186	62	59	0.753224	1.04758	0.303802	0.276177	0.00380198	-1.34337	down
ENSMUSG00000041773	Enc1	138	166	746	1140	0.429571	0.541233	2.16089	3.1429	1.14969e-20	2.71919	up
ENSMUSG00000000958	Slc7a7	96	129	581	570	0.636833	0.887553	3.80498	3.57735	2.32568e-17	2.44576	up
ENSMUSG00000015950	Ncf1	93	96	217	224	0.497333	0.525424	1.07543	1.06464	0.000292352	1.31404	up
ENSMUSG00000061273	Mmgt1	1789	1653	3183	4746	6.24848	6.05817	10.3246	14.6494	2.80207e-09	1.29167	up
ENSMUSG00000032715	Trib3	1085	1368	288	460	7.91722	10.4796	1.95162	2.96588	1.59609e-08	-1.62821	down
Mus_musculus_newGene_1898	Mus_musculus_newGene_1898	8	13	200	264	0.057009	0.096799	1.40962	1.76884	7.75913e-18	4.55316	up
Mus_musculus_newGene_1893	Mus_musculus_newGene_1893	261	246	80	41	1.45932	1.05554	0.421346	0.202891	3.21773e-05	-1.96765	down
ENSMUSG00000064210	Ano6	210	206	529	631	0.628535	0.64802	1.50794	1.67404	3.7999e-10	1.56969	up
ENSMUSG00000002944	Cd36	1195	1607	5515	6821	5.79397	8.30623	25.5399	29.5766	1.33011e-27	2.22596	up
ENSMUSG00000037095	Lrg1	14566	19093	230980	224122	153.02	210.518	2253.18	2080.35	1.45451e-110	3.84789	up
ENSMUSG00000093593	Gm20683	251	360	95	72	1.3288	1.9986	0.464786	0.336854	1.15312e-05	-1.77858	down
ENSMUSG00000041439	Mfsd6	651	801	1464	1935	1.9528	2.54234	4.08274	5.13406	6.66586e-09	1.31452	up
ENSMUSG00000038375	Trp53inp2	10409	12729	21895	22659	39.8549	51.3338	78.5958	78.0026	9.25164e-11	1.0357	up
ENSMUSG00000038372	Gmds	103	78	979	1201	0.881875	0.704295	7.84563	9.15606	1.78621e-47	3.6813	up
ENSMUSG00000107928	Gm45140	667	204	7	12	2.02475	0.622569	0.016705	0.032773	2.53719e-16	-5.42326	down
ENSMUSG00000062960	Kdr	1135	508	348	217	2.83303	1.33092	0.804956	0.477328	0.00122194	-1.43708	down
ENSMUSG00000028600	Podn	255	245	28	40	1.18692	1.20975	0.115492	0.16244	2.53609e-11	-2.789	down
ENSMUSG00000025185	Loxl4	41	47	486	459	0.162113	0.193877	1.82033	1.6539	2.24189e-28	3.51709	up
ENSMUSG00000033610	Pank1	17039	15407	6758	8258	62.7031	40.9023	20.5547	20.7713	1.52534e-11	-1.02116	down
ENSMUSG00000006522	Itih3	38085	36122	350556	380707	189.422	189.442	1626.26	1672.32	3.90123e-195	3.39228	up
ENSMUSG00000026295	Spp2	5939	5469	2623	2140	94.7703	91.6922	38.8946	30.1341	4.15383e-11	-1.16487	down
ENSMUSG00000031613	Hpgd	11365	7762	1785	1986	99.8823	71.6006	14.5611	15.4151	3.94829e-28	-2.24915	down
ENSMUSG00000031617	Tmem184c	1203	1181	4243	4831	6.7428	6.88332	21.9373	23.7951	7.57312e-45	2.01907	up
ENSMUSG00000060950	Trmt61a	240	306	661	602	1.59127	2.0694	3.98557	3.58539	1.09572e-06	1.30174	up
ENSMUSG00000003546	Klc4	3987	4699	1989	1758	25.4107	31.4215	11.7665	9.89532	5.01299e-10	-1.12036	down
ENSMUSG00000005873	Reep5	757	682	1658	1747	3.92561	3.70698	7.98096	8.00187	2.8428e-15	1.33479	up
ENSMUSG00000043740	B430306N03Rik	46	59	139	136	0.168229	0.226453	0.477741	0.44295	0.00202301	1.48013	up
Mus_musculus_newGene_1562	Mus_musculus_newGene_1562	220	208	94	64	0.557613	0.552144	0.220238	0.141938	0.00178036	-1.34117	down
ENSMUSG00000032578	Cish	223	193	1251	1348	1.15263	1.06034	6.04762	6.18073	2.52265e-42	2.73537	up
ENSMUSG00000032577	Mapkapk3	348	238	88	144	1.84116	1.30892	0.427491	0.66665	0.00365815	-1.2476	down
ENSMUSG00000032575	Manf	5889	7623	23114	22779	40.0116	54.6062	147.194	135.206	1.18164e-26	1.85469	up
ENSMUSG00000050069	Grem2	1394	795	263	337	5.50384	3.2921	0.961477	1.17505	3.82746e-08	-1.7743	down
ENSMUSG00000079429	Mroh2a	1098	774	133	144	2.16535	1.59901	0.242658	0.249665	1.9123e-22	-2.66303	down
ENSMUSG00000059588	Calcrl	713	275	132	160	2.16029	0.874139	0.371102	0.428231	0.000633469	-1.6627	down
ENSMUSG00000044005	Gls2	29077	31918	8347	11510	184.941	194.021	44.8059	61.0143	3.56981e-17	-1.53149	down
ENSMUSG00000040584	Abcb1a	769	359	131	163	2.27366	1.11489	0.357678	0.424603	1.21284e-05	-1.84538	down
ENSMUSG00000051000	Fam160a1	180	267	671	857	0.596139	0.967298	2.14999	2.61489	5.35896e-10	1.86016	up
ENSMUSG00000056054	S100a8	0	0	123	80	0	0	3.4486	2.13467	3.43986e-08	9.20535	up
Mus_musculus_newGene_1225	Mus_musculus_newGene_1225	17	29	79	87	0.179663	0.199809	0.469503	0.526754	0.00357884	1.9398	up
Mus_musculus_newGene_3903	Mus_musculus_newGene_3903	166	178	30	21	0.561533	0.761749	0.210518	0.061913	9.77583e-08	-2.65916	down
Mus_musculus_newGene_3900	Mus_musculus_newGene_3900	730	594	59	26	0.776583	0.641317	0.055899	0.023469	2.10943e-21	-3.86071	down
ENSMUSG00000038550	Ciart	2852	2352	59	68	27.304	22.7813	0.525556	0.628448	3.3238e-121	-5.26435	down
ENSMUSG00000066829	Zfp810	186	329	646	734	0.886397	1.63351	2.76123	3.02032	1.04442e-05	1.50916	up
ENSMUSG00000030729	Pgm2l1	525	299	73	119	0.877548	0.52519	0.118581	0.175945	3.09464e-06	-2.01107	down
ENSMUSG00000039601	Rcan2	206	262	1417	1726	1.00304	1.33823	6.34934	7.37345	1.37049e-36	2.836	up
ENSMUSG00000031451	Gas6	1711	1681	6171	7237	9.93183	10.2378	33.2596	37.1183	7.50027e-48	2.07322	up
ENSMUSG00000029059	Prxl2b	524	535	121	63	8.76198	9.39537	1.87243	0.918754	3.48132e-10	-2.42619	down
ENSMUSG00000029056	Pank4	887	786	348	372	5.32986	4.95822	1.90583	1.95469	1.80883e-07	-1.12418	down
Mus_musculus_newGene_3596	Mus_musculus_newGene_3596	6	11	89	77	0.089467	0.14182	1.16021	0.964486	5.85027e-06	3.37915	up
ENSMUSG00000021190	Lgmn	1713	1297	3488	4389	12.7388	10.1218	24.0786	28.8286	2.67005e-13	1.47904	up
ENSMUSG00000001666	Ddt	11281	8274	3596	4023	257.341	198.16	76.1348	81.0478	1.33025e-11	-1.26698	down
ENSMUSG00000022551	Cyc1	11827	11279	4886	4657	116.591	118.797	45.1688	40.4769	6.65929e-20	-1.18265	down
ENSMUSG00000117406	Ntn3	281	399	127	164	0.824101	1.22677	0.345831	0.423069	0.00220961	-1.13743	down
ENSMUSG00000028019	Pdgfc	242	183	717	602	1.01554	0.908364	3.18146	2.49261	4.75231e-10	1.72986	up
Mus_musculus_newGene_2318	Mus_musculus_newGene_2318	174	175	28	20	1.90119	2.01636	0.276292	0.190412	2.37489e-08	-2.76729	down
Mus_musculus_newGene_2313	Mus_musculus_newGene_2313	61	56	331	124	0.293076	0.281947	1.48032	0.526181	0.000478376	2.0632	up
ENSMUSG00000018427	Ypel2	574	520	1364	1452	1.75457	1.6662	3.91412	4.01683	3.17355e-16	1.45607	up
ENSMUSG00000032372	Plscr2	2684	2352	1000	576	22.0051	20.4284	7.52349	4.10443	5.94796e-08	-1.57636	down
ENSMUSG00000032377	Plscr4	204	108	44	32	0.937777	0.521865	0.187304	0.129307	0.000824266	-1.93808	down
ENSMUSG00000049047	Armcx3	772	777	2354	3203	3.38299	3.68513	9.73187	12.7468	1.36606e-22	1.93133	up
ENSMUSG00000036327	Qsox2	318	323	711	902	1.33164	1.40738	2.76855	3.48192	1.23369e-09	1.42061	up
ENSMUSG00000007080	Pole	102	117	30	24	0.209721	0.252959	0.056898	0.043425	0.000774558	-1.92656	down
ENSMUSG00000040877	Wdr25	125	212	310	378	0.426964	0.767288	0.981727	1.17738	0.00494018	1.11628	up
ENSMUSG00000003355	Fkbp11	549	800	3431	3270	11.0537	16.906	64.202	58.2093	8.4936e-27	2.40292	up
ENSMUSG00000023089	Ndufa5	1479	1354	626	491	25.1092	25.266	9.88263	7.65948	1.83397e-08	-1.24714	down
ENSMUSG00000095098	Ccdc85b	496	589	114	132	1.55479	1.94678	0.331402	0.364834	5.53141e-13	-2.05142	down
ENSMUSG00000074639	Rdh16f2	7958	6403	1491	1742	93.0469	78.5764	16.1805	17.9918	3.58811e-34	-2.05944	down
ENSMUSG00000028977	Casz1	25	14	89	100	0.058768	0.026378	0.23368	0.446744	0.000233338	2.37048	up
Mus_musculus_newGene_1336	Mus_musculus_newGene_1336	33	40	210	214	0.364936	0.46085	2.24288	2.34149	3.62825e-10	2.62919	up
ENSMUSG00000042462	Dctpp1	924	851	379	335	20.2079	19.5343	7.68719	6.47244	3.38784e-08	-1.21978	down
ENSMUSG00000001229	Dpp9	2759	2939	7482	10071	12.0919	13.5212	30.4552	39.0075	8.22242e-22	1.71126	up
ENSMUSG00000001227	Sema6b	154	206	747	792	0.613123	0.853805	3.01132	3.04512	4.57284e-17	2.18579	up
ENSMUSG00000059772	Slx1b	561	513	228	213	2.72902	2.57785	1.03744	0.923637	3.32292e-06	-1.19071	down
ENSMUSG00000030256	Bhlhe41	1260	1056	80	57	3.35123	2.87736	0.177428	0.120458	2.71241e-48	-3.98342	down
Mus_musculus_newGene_3208	Mus_musculus_newGene_3208	121	94	8	7	1.97347	1.6292	0.228317	0.116922	6.89705e-08	-3.74685	down
Mus_musculus_newGene_3204	Mus_musculus_newGene_3204	10	22	106	128	0.053572	0.140461	0.617051	0.717344	4.72829e-06	2.9568	up
ENSMUSG00000015243	Abca1	12295	10933	36070	45596	17.7217	16.5396	48.2756	58.0694	1.9308e-34	1.90392	up
ENSMUSG00000028007	Snx7	1014	1038	2158	2388	8.32993	8.87181	15.5004	17.2133	2.92261e-15	1.23839	up
ENSMUSG00000054499	Dedd2	1816	1837	751	766	14.4397	15.4334	5.63592	5.45763	6.1004e-13	-1.176	down
ENSMUSG00000026077	Npas2	7	14	305	330	0.022605	0.050993	1.16121	1.18355	7.05726e-25	5.00788	up
ENSMUSG00000021830	Txndc16	292	213	79	113	0.985402	0.689257	0.214041	0.313101	0.00154414	-1.30486	down
ENSMUSG00000021831	Ero1a	1837	1763	3284	3996	6.14893	6.19451	10.2092	11.8182	6.96308e-12	1.10599	up
ENSMUSG00000030681	Mvp	2879	2916	12818	11121	15.0167	15.9529	62.0535	51.3063	1.9299e-46	2.14038	up
ENSMUSG00000072772	Grcc10	1684	1828	714	668	28.8504	32.8768	11.3497	10.1051	3.39134e-12	-1.25315	down
ENSMUSG00000027864	Ptgfrn	237	261	536	629	0.591561	0.686522	1.24695	1.3912	1.47553e-07	1.31585	up
ENSMUSG00000063232	Serpina11	5117	4456	9455	9414	51.9716	47.6326	89.7678	85.2434	1.20861e-14	1.07215	up
ENSMUSG00000031226	Pbdc1	358	396	781	772	2.95036	3.31956	5.85703	5.80346	1.98507e-07	1.13415	up
ENSMUSG00000032369	Plscr1	1144	1141	6164	4950	7.37727	7.6959	36.7779	28.1604	2.05269e-40	2.37707	up
ENSMUSG00000062181	Ces3b	35990	35084	7843	7233	226.703	232.624	45.7853	39.9439	1.19201e-62	-2.14369	down
ENSMUSG00000032363	Adamts7	1309	1187	156	145	3.69676	3.57628	0.40933	0.357565	6.42284e-44	-2.95839	down
ENSMUSG00000032366	Tpm1	1627	1571	3301	3352	13.5302	13.6009	26.6007	25.7624	2.40942e-16	1.14907	up
ENSMUSG00000036944	Tmem71	135	76	244	280	0.666265	0.39128	1.12079	1.22202	0.000946045	1.40621	up
ENSMUSG00000028194	Ddah1	9390	9624	1386	1273	36.9194	39.6939	5.05527	4.41871	4.63131e-86	-2.74511	down
ENSMUSG00000028195	Ccn1	1031	855	103	102	7.54685	6.57341	0.697741	0.657288	1.52087e-36	-3.10826	down
ENSMUSG00000070044	Fam149a	2428	2347	982	928	8.97618	8.31839	3.15819	3.21478	1.13477e-14	-1.22888	down
ENSMUSG00000070047	Fat1	1644	1953	3512	5261	1.67303	2.10156	3.28862	4.6584	2.00206e-09	1.37232	up
ENSMUSG00000020766	Galk1	2615	2493	1186	1036	27.5101	27.5233	11.5824	9.62975	1.4225e-10	-1.10681	down
ENSMUSG00000044548	Dact1	346	529	90	167	1.41491	2.28144	0.372673	0.594388	7.92948e-05	-1.68496	down
ENSMUSG00000024855	Pacs1	260	251	112	98	0.788819	0.799395	0.314413	0.260726	0.000828033	-1.18919	down
ENSMUSG00000030895	Hpx	184462	175616	2492630	2508194	1820.72	1818.85	22839.2	22024.3	7.04734e-268	3.88824	up
ENSMUSG00000027954	Efna1	1693	2497	4887	4277	16.9019	26.1876	45.3197	37.9796	2.22973e-07	1.22034	up
ENSMUSG00000047150	1700001C19Rik	719	751	157	120	6.55292	7.18767	1.32302	0.963642	1.10274e-17	-2.31332	down
ENSMUSG00000006494	Pdk1	7377	5928	1988	1900	21.0433	17.748	5.26398	4.78737	3.39517e-24	-1.68066	down
ENSMUSG00000043279	Trim56	1102	965	1943	2081	1.76417	1.63248	2.89722	2.96915	2.71143e-10	1.05329	up
Mus_musculus_newGene_733	Mus_musculus_newGene_733	12122	23721	138833	148025	32.0246	65.7743	340.569	345.524	6.28565e-28	3.08756	up
ENSMUSG00000017737	Mmp9	19	24	134	89	0.087556	0.11315	0.57734	0.361719	4.99734e-05	2.47046	up
ENSMUSG00000015461	Atf6b	908	1263	2445	2488	5.23141	7.63641	13.0822	12.6707	6.01694e-09	1.27396	up
ENSMUSG00000041126	H2az2	1404	1327	553	460	12.9172	13.04	4.64451	3.68063	1.13014e-10	-1.33617	down
ENSMUSG00000055435	Maf	1008	675	324	348	2.89672	1.95598	0.89305	0.872909	1.12921e-05	-1.23056	down
ENSMUSG00000020051	Pah	117473	107158	4902	6270	811.239	776.699	31.4598	38.3367	1.86395e-170	-4.23983	down
ENSMUSG00000040297	Suco	1076	1311	3360	4419	2.51824	3.23218	7.34547	9.28956	6.59474e-19	1.7919	up
ENSMUSG00000040296	Ddx58	1374	1435	3740	2588	5.2459	5.75063	13.2578	8.72973	5.31205e-08	1.26815	up
ENSMUSG00000109179	Gm35339	242	221	87	48	0.543383	0.519011	0.180488	0.094954	0.000343805	-1.67915	down
ENSMUSG00000025279	Dnase1l3	1339	543	333	190	4.17119	1.7727	0.962542	0.520903	0.000218241	-1.74285	down
ENSMUSG00000025270	Alas2	5818	7225	2517	2292	44.7739	58.2653	17.8965	15.4419	1.00737e-13	-1.34758	down
ENSMUSG00000019906	Lin7a	992	695	207	232	6.52959	4.69467	1.22473	1.30544	1.36649e-11	-1.84896	down
ENSMUSG00000020357	Flt4	497	324	187	152	1.17345	0.803385	0.409748	0.315629	0.00119172	-1.17886	down
ENSMUSG00000036775	Decr2	14282	12636	5252	5244	102.369	93.3933	32.9622	31.258	1.60865e-21	-1.26569	down
ENSMUSG00000062410	Hsd3b3	16715	13252	275	160	178.493	149.63	2.71984	1.48894	4.32272e-122	-6.00673	down
ENSMUSG00000038641	Akr1d1	20339	15462	1678	1273	111.467	88.9367	8.53622	6.16359	2.8968e-64	-3.50332	down
ENSMUSG00000030340	Scnn1a	3054	2958	768	685	12.9624	13.1771	3.02348	2.56373	9.48272e-33	-1.95514	down
ENSMUSG00000030341	Tnfrsf1a	4560	4537	9681	10525	31.4788	32.8098	61.8995	63.8701	1.50168e-23	1.24251	up
ENSMUSG00000073418	C4b	61821	63156	129752	136662	170.543	182.965	332.732	332.736	4.88344e-25	1.18341	up
ENSMUSG00000043079	Synpo	145	218	995	1383	0.417747	0.666492	2.69245	3.56985	9.94161e-22	2.7975	up
ENSMUSG00000029298	Gbp9	267	150	2458	1648	0.900504	0.529671	7.70338	4.91551	4.05013e-26	3.40023	up
ENSMUSG00000048578	Mlec	6505	8695	16355	21023	16.1566	22.6683	37.7202	46.1369	1.33025e-11	1.38521	up
ENSMUSG00000029438	Bcl7a	985	1424	434	443	3.09645	4.69734	1.26299	1.22501	1.62391e-07	-1.36826	down
ENSMUSG00000025731	Mettl26	5336	5620	2325	1911	69.5088	75.8773	27.4766	21.5038	2.66516e-13	-1.27671	down
ENSMUSG00000033991	Ttc37	1148	1271	2165	2406	2.60201	2.88109	4.34699	4.64424	1.55135e-09	1.00836	up
ENSMUSG00000024955	Esrra	1948	2149	765	689	12.8527	14.8352	4.66238	4.00747	1.64065e-14	-1.40181	down
ENSMUSG00000027605	Acss2	24695	24589	3088	2834	126.89	132.944	14.6969	12.9874	1.41358e-113	-2.9637	down
ENSMUSG00000051730	Mettl5	788	692	270	303	12.4149	11.2909	3.84611	4.22301	3.00704e-08	-1.27726	down
ENSMUSG00000040505	Abcg5	11600	7951	1078	1518	73.8351	53.0563	6.32593	8.47452	4.27922e-34	-2.82232	down
ENSMUSG00000026553	Copa	10960	11480	22787	27580	36.2058	38.9748	68.3269	78.4007	2.7623e-18	1.25589	up
ENSMUSG00000057367	Birc2	1402	1710	4431	4387	7.28137	9.21805	20.8227	19.6875	1.16606e-20	1.59365	up
ENSMUSG00000016344	Ppdpf	3302	3540	1474	1348	49.9797	57.1158	20.6781	18.1482	1.73536e-13	-1.18492	down
Mus_musculus_newGene_3518	Mus_musculus_newGene_3518	1059	1528	21138	24483	3.3043	4.95597	60.9046	67.6443	4.06756e-96	4.22832	up
Mus_musculus_newGene_3511	Mus_musculus_newGene_3511	3607	2829	7566	5970	8.63654	6.88505	16.6491	12.7449	1.2915e-08	1.16935	up
Mus_musculus_newGene_3515	Mus_musculus_newGene_3515	156	135	4569	4139	0.769017	0.713723	21.3556	18.7014	1.95614e-166	4.99735	up
ENSMUSG00000025207	Sema4g	26682	31947	9299	7478	87.0316	108.985	28.206	21.5367	2.79551e-20	-1.71142	down
ENSMUSG00000041378	Cldn5	215	83	38	25	2.24337	0.908849	0.364711	0.229945	0.00169396	-2.13954	down
ENSMUSG00000022003	Slc25a30	726	553	877	1702	2.99016	2.3907	3.35662	6.19821	0.00140054	1.09779	up
ENSMUSG00000022000	Zc3h13	1315	1289	5256	2859	3.16103	3.2532	11.7429	6.07766	3.70858e-09	1.73962	up
ENSMUSG00000020538	Srebf1	34959	27414	2141	1877	129.987	105.606	6.89786	5.79764	1.06335e-112	-3.86093	down
ENSMUSG00000020532	Acaca	10018	8565	2291	3050	16.3221	14.5713	3.37028	4.4497	3.29781e-21	-1.70906	down
ENSMUSG00000020534	Shmt1	13374	12091	4211	3750	69.215	65.677	20.233	17.1443	5.7294e-27	-1.58319	down
Mus_musculus_newGene_2396	Mus_musculus_newGene_2396	30	39	99	121	0.201997	0.275782	0.619521	0.721112	0.00137294	1.76132	up
ENSMUSG00000035864	Syt1	1525	1091	265	239	4.67959	3.51138	0.754031	0.647052	5.51393e-20	-2.28039	down
ENSMUSG00000028093	Acp6	2263	2349	924	979	19.0841	20.7908	7.23344	7.29382	3.46488e-14	-1.18586	down
ENSMUSG00000052921	Arhgef15	448	192	108	73	1.53948	0.680805	0.33801	0.217763	0.00109465	-1.72018	down
ENSMUSG00000022821	Hgd	39219	37764	8926	11485	343.832	348.151	72.0233	88.5998	2.94841e-32	-1.82589	down
ENSMUSG00000020098	Pcbd1	11097	11151	4741	4680	208.257	219.654	82.6021	77.5538	2.94355e-20	-1.1474	down
ENSMUSG00000027371	Fahd2a	1015	935	376	302	12.3905	11.9819	4.2556	3.2485	1.13044e-09	-1.42899	down
ENSMUSG00000033715	Akr1c14	43858	35738	6711	5733	215.418	184.043	30.4354	24.8429	1.20899e-53	-2.58169	down
ENSMUSG00000033713	Foxn3	4430	3651	1765	1957	8.88757	7.58587	3.36127	3.75585	7.97643e-10	-1.02623	down
ENSMUSG00000046718	Bst2	5398	6144	3067	2148	100.798	120.421	53.1839	35.4389	4.2943e-06	-1.05045	down
ENSMUSG00000037411	Serpine1	47	58	4231	7810	0.229879	0.296306	19.2986	33.8977	2.01052e-112	6.92522	up
ENSMUSG00000027951	Adar	1139	1423	3638	2576	3.05999	3.90481	9.40356	6.01034	2.11572e-08	1.37326	up
ENSMUSG00000031712	Il15	122	63	8	13	1.02544	0.647726	0.069538	0.084937	7.08927e-05	-3.04689	down
ENSMUSG00000026020	Nop58	1143	1231	2419	2150	2.34894	2.5338	4.51418	3.43699	4.11816e-09	1.03772	up
ENSMUSG00000089943	Ugt1a5	8914	15550	3694	2993	59.8489	109.583	23.0277	17.7516	1.4225e-10	-1.78008	down
ENSMUSG00000032437	Stt3b	6376	6061	14753	17635	22.3406	22.2915	48.0028	54.601	5.46144e-26	1.47112	up
ENSMUSG00000044783	Hjurp	12591	10473	3472	3298	38.2865	33.4184	9.80406	8.85545	3.68697e-28	-1.67435	down
ENSMUSG00000018900	Slc22a5	1467	1302	2035	3750	7.09336	6.59855	9.13086	16.0032	7.28113e-05	1.14849	up
ENSMUSG00000041571	Selenow	1556	1836	806	727	31.2541	38.7148	15.0276	12.8936	1.73929e-07	-1.05348	down
ENSMUSG00000027035	Cers6	1085	834	2887	2659	2.27882	1.83892	5.63746	4.93766	3.98574e-17	1.62599	up
Mus_musculus_newGene_506	Mus_musculus_newGene_506	368	398	117	65	1.41945	1.52238	0.420374	0.213624	1.00687e-06	-1.97563	down
ENSMUSG00000057440	Mpp7	366	335	686	806	1.08572	1.06551	1.91254	2.14765	1.52552e-07	1.18057	up
Mus_musculus_newGene_2846	Mus_musculus_newGene_2846	6	18	245	145	0.056891	0.315176	3.77936	2.21687	3.04073e-10	4.11657	up
Mus_musculus_newGene_629	Mus_musculus_newGene_629	878	779	281	83	1.60655	1.551	0.456021	0.127545	5.40389e-05	-2.08051	down
Mus_musculus_newGene_626	Mus_musculus_newGene_626	87	144	449	527	0.490247	0.86369	2.36083	2.45884	7.15991e-10	2.16639	up
ENSMUSG00000036120	Rfxank	885	1121	2207	2086	3.72948	5.09645	8.75255	7.75479	3.36685e-09	1.18904	up
ENSMUSG00000054364	Rhob	1057	1272	2746	3116	6.65598	8.4067	16.0523	17.3314	2.78271e-15	1.42114	up
ENSMUSG00000039765	Cc2d2a	275	250	78	70	0.76559	0.705628	0.193834	0.166068	1.83461e-06	-1.73294	down
Mus_musculus_newGene_3497	Mus_musculus_newGene_3497	328	319	145	69	5.90068	6.01406	2.40993	1.0915	0.00128652	-1.49576	down
Mus_musculus_newGene_3491	Mus_musculus_newGene_3491	413	572	124	89	2.37886	3.46122	0.662386	0.45299	2.69688e-09	-2.11575	down
ENSMUSG00000025969	Nrp2	406	295	609	961	0.929133	0.699554	1.28625	1.94093	8.15132e-05	1.25198	up
ENSMUSG00000021091	Serpina3n	19291	19914	776360	900422	138.246	149.786	5166.28	5701.53	0	5.50863	up
ENSMUSG00000021097	Clmn	11894	11542	3979	5967	15.7753	16.4686	5.13826	7.35003	2.71803e-08	-1.14916	down
Mus_musculus_newGene_2454	Mus_musculus_newGene_2454	75	55	176	150	0.612785	0.663498	1.54683	1.20073	0.00182669	1.42215	up
ENSMUSG00000052229	Gpr17	239	307	130	71	0.680137	0.914701	0.343683	0.177786	0.00388563	-1.34457	down
ENSMUSG00000053175	Bcl3	1929	2492	7302	5749	15.4695	21.0462	54.4673	40.9059	9.69357e-15	1.65521	up
ENSMUSG00000030595	Nfkbib	924	1063	2032	1890	10.9621	13.0082	21.8547	19.4594	5.20947e-09	1.07319	up
ENSMUSG00000026189	Pecr	15188	14434	6242	5761	191.284	191.335	73.1975	64.9362	2.06993e-19	-1.20974	down
ENSMUSG00000040938	Slc16a11	601	592	155	155	4.92905	5.15777	1.18514	1.11752	1.10484e-13	-1.85204	down
ENSMUSG00000029321	Slc10a6	8	12	858	980	0.053346	0.081768	5.54389	6.02914	1.27931e-60	6.61212	up
ENSMUSG00000029328	Hnrnpdl	4685	4049	2267	1767	28.7144	25.6698	12.6368	9.37658	3.61342e-07	-1.01821	down
ENSMUSG00000035284	Vps13c	2174	1862	3105	4487	2.88119	2.58941	3.78834	5.16115	4.08296e-06	1.00022	up
ENSMUSG00000023033	Scn8a	33	37	90	131	0.04181	0.049678	0.107395	0.148532	0.00182424	1.74586	up
Mus_musculus_newGene_1185	Mus_musculus_newGene_1185	104	93	284	228	0.575703	0.589695	1.54352	1.16411	6.32646e-05	1.47334	up
Mus_musculus_newGene_1188	Mus_musculus_newGene_1188	148	132	18	16	2.82755	2.56297	0.29601	0.250549	6.869e-08	-2.94813	down
Mus_musculus_newGene_628	Mus_musculus_newGene_628	248	168	0	0	1.44637	1.0301	0	0	2.96884e-10	-10.0486	down
ENSMUSG00000050440	Hamp	14382	11082	44392	38548	518.842	419.625	1487.09	1228.77	4.08638e-24	1.79936	up
Mus_musculus_newGene_2294	Mus_musculus_newGene_2294	32	35	103	86	0.139433	0.157739	0.424162	0.354657	0.005826	1.58994	up
ENSMUSG00000027187	Cat	256557	237460	64314	50858	1452.34	1410.87	338.054	254.375	1.44293e-32	-2.00508	down
ENSMUSG00000054757	Akr1c20	5547	4416	1435	1145	65.3765	53.7751	15.8518	11.8062	3.88577e-20	-1.85276	down
ENSMUSG00000022235	Cmbl	8848	8392	3430	3953	116.563	116.633	44.1422	49.3613	1.44233e-16	-1.13267	down
ENSMUSG00000030031	Kbtbd8	140	135	291	293	0.425297	0.4295	0.818356	0.784968	0.000182719	1.17885	up
ENSMUSG00000037020	Wdr62	277	264	80	47	0.887578	1.02044	0.22868	0.12601	3.81924e-06	-1.99301	down
ENSMUSG00000063179	Pstk	459	498	228	184	6.40962	7.34803	3.06806	2.36563	0.000116756	-1.1219	down
ENSMUSG00000039519	Cyp7b1	12925	11555	40941	38857	88.2665	82.8182	259.606	234.456	5.99832e-43	1.79837	up
ENSMUSG00000022790	Igsf11	961	1169	2021	2324	4.12748	5.26898	8.05895	8.81843	6.32373e-09	1.11773	up
ENSMUSG00000028830	AU040320	1558	1586	2911	3752	5.28424	5.70955	9.12895	11.1979	4.99501e-11	1.17252	up
ENSMUSG00000034640	Tiparp	494	400	1169	1133	1.74056	1.47968	3.8299	3.53247	2.93044e-12	1.45839	up
ENSMUSG00000036863	Syde2	697	742	220	418	2.09129	2.40368	0.601077	1.06468	0.00199101	-1.08907	down
ENSMUSG00000036864	Proser3	202	229	74	75	1.26844	1.45211	0.441753	0.420917	0.000217285	-1.44117	down
ENSMUSG00000036867	Smad6	300	422	141	193	1.48707	2.19747	0.646187	0.841419	0.00568548	-1.02569	down
ENSMUSG00000020484	Xbp1	16873	15721	32221	29504	122.614	120.572	216.246	186.367	6.46372e-14	1.01504	up
ENSMUSG00000020486	Septin4	330	242	50	62	3.32846	2.65304	0.210213	0.599008	9.42988e-09	-2.2605	down
ENSMUSG00000020483	Dynll2	8771	7166	3247	3128	52.4309	44.9541	18.0168	16.5103	1.29055e-14	-1.22787	down
ENSMUSG00000028300	C9orf72	740	664	1513	2379	3.33004	3.19996	6.45448	9.67186	4.95173e-10	1.55833	up
ENSMUSG00000020156	Pwwp3a	459	610	231	229	2.67159	3.65898	1.24861	1.15513	0.000124932	-1.12612	down
ENSMUSG00000020150	Gamt	11720	11418	482	194	176.026	179.993	6.70117	2.56299	3.46242e-14	-4.99412	down
ENSMUSG00000024487	Yipf5	2860	3230	7514	8022	12.7106	15.0658	31.0091	31.4998	1.38897e-23	1.44169	up
Mus_musculus_newGene_1683	Mus_musculus_newGene_1683	0	0	94	127	0	0	0.404052	0.520299	1.47781e-08	9.31923	up
ENSMUSG00000027559	Car3	229229	199780	317	239	2019.5	1847.29	2.58909	1.85644	0	-9.49585	down
ENSMUSG00000041044	Lrit1	1390	1229	272	214	4.75351	4.40818	0.860633	0.645481	3.05374e-24	-2.3345	down
ENSMUSG00000058152	Chsy3	294	215	666	744	1.16135	0.841381	2.20948	2.50845	2.53284e-09	1.56267	up
ENSMUSG00000000088	Cox5a	8066	7918	3184	2938	184.966	190.581	67.7805	59.5133	9.76589e-21	-1.29126	down
Mus_musculus_newGene_2643	Mus_musculus_newGene_2643	0	0	180	292	0	0	1.09958	1.56563	5.22751e-11	10.4118	up
Mus_musculus_newGene_994	Mus_musculus_newGene_994	2527	2489	979	738	7.35301	7.13462	2.47645	1.70109	5.14663e-12	-1.45102	down
ENSMUSG00000040026	Saa3	150	451	219742	160814	3.70013	12.177	5347.63	3743.45	1.07625e-32	9.39591	up
ENSMUSG00000057933	Gsta2	3579	3943	34	14	62.7561	72.5485	0.537588	0.208209	5.296e-128	-7.19711	down
ENSMUSG00000015083	C8g	17290	16785	6714	5680	222.72	226.858	80.3881	64.6779	9.25229e-19	-1.36459	down
ENSMUSG00000053303	Slc22a26	87	111	19	36	0.476095	0.648398	0.090455	0.173863	0.00690542	-1.76367	down
ENSMUSG00000038855	Itpkb	203	146	58	79	0.479589	0.362942	0.127164	0.164826	0.00734506	-1.25809	down
ENSMUSG00000018398	Septin8	248	166	73	86	0.97973	0.586309	0.260813	0.254763	0.00338024	-1.28768	down
ENSMUSG00000068566	Myadm	1535	1571	2649	3312	7.6826	8.36297	12.7046	15.2779	2.90566e-09	1.0298	up
ENSMUSG00000020010	Vnn3	4211	3682	15340	14383	34.3892	31.5615	116.337	103.797	3.28578e-46	2.00684	up
ENSMUSG00000054659	Pm20d2	58	60	121	204	0.591484	0.630342	1.15371	1.84023	0.00182891	1.5476	up
ENSMUSG00000033249	Hsf4	525	570	119	130	4.53667	5.35129	0.938247	0.992611	2.32957e-14	-2.04599	down
ENSMUSG00000021947	Cryl1	1739	1862	330	257	17.1765	19.3029	3.01949	2.24295	1.89087e-31	-2.52259	down
ENSMUSG00000062515	Fabp4	113	71	357	294	1.85119	1.21937	5.46022	4.28761	6.73915e-07	1.92009	up
ENSMUSG00000033799	Tasor2	837	957	1743	2133	1.70398	1.82104	2.93017	3.39814	5.20163e-10	1.20027	up
ENSMUSG00000036545	Adamts2	207	145	76	59	0.419404	0.309164	0.145969	0.117805	0.00677434	-1.28556	down
ENSMUSG00000033792	Atp7a	139	139	257	422	0.416589	0.437787	0.718019	1.12479	0.000259273	1.37468	up
ENSMUSG00000023092	Fhl1	300	194	59	119	1.90721	1.26353	0.336459	0.658851	0.00644613	-1.3853	down
ENSMUSG00000060613	Cyp2c70	34618	29440	15767	13580	300.938	267.834	126.434	104.338	2.59003e-10	-1.03099	down
ENSMUSG00000031796	Cfap20	2054	1971	744	724	20.8955	21.0594	7.43051	7.18115	5.54009e-17	-1.3624	down
ENSMUSG00000031790	Mmp15	2933	3272	511	490	8.44613	9.8908	1.36591	1.24473	1.33708e-51	-2.54012	down
ENSMUSG00000022323	Rida	41173	39846	10505	9381	606.589	616.138	143.701	122.114	6.68066e-46	-1.93267	down
ENSMUSG00000029771	Irf5	799	869	339	327	5.38994	6.17049	2.12066	1.95136	1.82964e-08	-1.23252	down
ENSMUSG00000029776	Hibadh	24993	23798	8198	8276	202.572	202.444	61.6955	59.2659	2.93807e-36	-1.47401	down
ENSMUSG00000022610	Mapk12	186	141	59	32	1.51737	1.20328	0.441774	0.228395	0.00142058	-1.74522	down
ENSMUSG00000024079	Eif2ak2	814	868	2440	1823	2.78997	3.12186	7.76889	5.52199	8.83677e-11	1.43706	up
ENSMUSG00000058799	Nap1l1	2475	2685	4940	6407	11.8063	13.4015	21.694	26.5153	3.57207e-12	1.22529	up
ENSMUSG00000024694	Keg1	14829	14650	772	507	131.572	136.476	6.35981	4.04526	1.222e-91	-4.42945	down
ENSMUSG00000006818	Sod2	13009	12763	37037	36383	33.2025	34.2358	91.962	86.0597	8.96532e-43	1.60293	up
ENSMUSG00000005547	Cyp2a5	92679	64574	1177	1034	685.196	502.443	8.15474	6.71293	1.98112e-206	-6.05606	down
ENSMUSG00000040624	Plekhg1	160	112	50	40	0.319365	0.235247	0.092721	0.069524	0.00455265	-1.49896	down
ENSMUSG00000026692	Fmo4	603	505	1314	1527	3.94157	3.27743	7.47996	8.51367	2.235e-13	1.4499	up
ENSMUSG00000026342	Slc35f5	3232	2820	6905	8115	17.6135	16.1384	35.6087	39.571	2.7093e-20	1.40249	up
ENSMUSG00000007039	Ddah2	116	83	31	30	1.27454	0.960546	0.312109	0.284367	0.00684859	-1.61136	down
ENSMUSG00000007035	Msh5	101	102	20	17	0.529111	0.562921	0.089697	0.077032	9.64118e-05	-2.36246	down
ENSMUSG00000063060	Sox7	107	155	7	11	0.476475	0.727988	0.02498	0.042072	1.12686e-08	-3.77688	down
Mus_musculus_newGene_511	Mus_musculus_newGene_511	140	123	200	358	1.85047	1.91887	2.40534	4.1983	0.00591058	1.17137	up
ENSMUSG00000051984	Sec31b	655	664	208	204	2.47462	2.64616	0.751464	0.696771	1.88495e-11	-1.58648	down
ENSMUSG00000000782	Tcf7	374	318	148	130	2.29371	2.02457	0.845519	0.694463	0.000141509	-1.22115	down
Mus_musculus_newGene_3415	Mus_musculus_newGene_3415	453	436	2080	822	1.7844	1.80423	8.21338	3.20441	1.27612e-05	1.81009	up
ENSMUSG00000054855	Rnd1	466	473	3686	4959	3.22708	3.55239	23.4157	29.8225	7.18476e-68	3.29111	up
ENSMUSG00000041237	Pklr	28194	28611	5158	3353	143.958	153.437	24.4106	15.3238	3.56431e-32	-2.6412	down
ENSMUSG00000055184	Fam72a	152	70	32	20	1.02155	0.490483	0.199221	0.118426	0.00476759	-1.99228	down
ENSMUSG00000025732	Mcrip2	1087	1095	377	349	18.1079	19.2143	5.99026	5.34996	9.54634e-14	-1.49468	down
ENSMUSG00000118669	ARVCF	693	630	209	280	2.64192	2.48413	0.715879	0.918	3.00431e-07	-1.34633	down
ENSMUSG00000118662	Tctn2	64	62	153	197	0.34437	0.346718	0.766189	0.937603	0.000263287	1.56337	up
ENSMUSG00000022122	Ednrb	612	250	110	190	2.36748	1.04259	0.366107	0.675348	0.00594649	-1.43129	down
ENSMUSG00000066363	Serpina3f	260	291	1233	3094	1.70765	2.00786	7.53528	17.9831	6.89381e-16	3.05386	up
ENSMUSG00000066361	Serpina3c	172	249	461	730	1.14917	1.74549	2.86058	4.30953	6.87657e-06	1.58466	up
ENSMUSG00000022129	Dct	371	161	54	23	2.48879	1.12981	0.332456	0.135007	1.60586e-05	-2.68244	down
ENSMUSG00000025479	Cyp2e1	620739	460900	196158	199127	5042.93	3945.13	1473.71	1420.95	2.99911e-15	-1.35822	down
ENSMUSG00000035941	Ibtk	4250	4012	12968	14308	11.1255	11.023	31.5355	33.1075	8.07523e-48	1.81442	up
ENSMUSG00000035948	Acss3	2089	2103	236	208	6.63697	7.02898	0.703895	0.599024	1.14366e-63	-3.14575	down
ENSMUSG00000021573	Tppp	371	456	108	135	1.07597	1.38821	0.289898	0.345504	1.63498e-07	-1.67844	down
ENSMUSG00000022906	Parp9	2374	2655	7351	5657	10.2111	11.7946	29.5036	21.5527	8.22777e-14	1.46578	up
ENSMUSG00000022901	Cd86	50	46	113	111	0.28877	0.27728	0.606123	0.569068	0.00961893	1.31524	up
ENSMUSG00000039914	Coq10a	1745	1471	658	654	18.7003	16.1436	6.42786	6.14333	1.46979e-10	-1.20015	down
ENSMUSG00000020227	Irak3	26	61	2074	2274	0.121252	0.304788	10.1897	9.59267	3.97236e-73	5.73097	up
ENSMUSG00000033453	Adamts15	30	28	78	141	0.072496	0.072754	0.1791	0.309788	0.00106948	2.00256	up
ENSMUSG00000071637	Cebpd	209	335	2209	1557	0.825247	1.38576	8.09865	5.43118	1.52169e-21	2.885	up
ENSMUSG00000060798	Intu	342	370	651	788	0.812368	0.963281	1.4266	1.62139	2.44247e-06	1.10457	up
ENSMUSG00000071632	2510002D24Rik	831	761	398	319	10.1093	9.49976	4.3895	3.37167	2.03557e-05	-1.05557	down
ENSMUSG00000035208	Slfn8	72	51	150	131	0.2655	0.196706	0.572989	0.423785	0.00815333	1.28761	up
ENSMUSG00000028413	B4galt1	2035	1605	7520	6480	7.58554	6.30772	26.0755	21.3119	5.00407e-29	2.03904	up
Mus_musculus_newGene_1277	Mus_musculus_newGene_1277	1295	1339	441	770	2.44327	2.72274	0.776942	1.42222	0.000456066	-1.03568	down
ENSMUSG00000006378	Gcat	6454	6501	1810	1993	40.2779	42.5832	10.4844	10.9858	1.21678e-36	-1.67731	down
ENSMUSG00000044244	Il20rb	89	68	166	193	0.468809	0.376502	0.816251	0.899742	0.00233063	1.28517	up
ENSMUSG00000059434	Gckr	11802	12494	4654	3701	77.4833	85.9275	28.2816	21.2801	2.48863e-16	-1.44536	down
ENSMUSG00000068101	Cenpm	137	108	38	38	1.74711	1.46341	0.454494	0.406579	0.00239317	-1.59511	down
ENSMUSG00000057561	Eif1a	2818	3060	11999	13480	14.6155	16.7447	58.7346	62.5823	7.64904e-59	2.20612	up
Mus_musculus_newGene_2214	Mus_musculus_newGene_2214	469	480	50	26	3.27206	2.87942	0.311614	0.20108	2.54592e-19	-3.54498	down
Mus_musculus_newGene_2210	Mus_musculus_newGene_2210	925	864	135	200	5.38013	5.33198	0.781216	1.04088	2.18802e-18	-2.32841	down
ENSMUSG00000042389	Tsen2	282	382	643	633	1.97269	2.80273	4.2344	3.95731	0.000165903	1.0329	up
ENSMUSG00000043648	Pld6	97	93	21	23	1.50426	1.50939	0.295367	0.316533	0.000808258	-2.0189	down
Mus_musculus_newGene_706	Mus_musculus_newGene_706	191	191	486	483	1.43316	1.13304	3.04153	2.81922	2.25783e-08	1.43519	up
Mus_musculus_newGene_701	Mus_musculus_newGene_701	706	691	213	175	4.31827	5.46353	1.44436	1.23965	5.05889e-12	-1.75387	down
Mus_musculus_newGene_700	Mus_musculus_newGene_700	54	42	254	191	0.298932	0.236063	1.22754	0.893091	9.2506e-08	2.30957	up
Mus_musculus_newGene_1732	Mus_musculus_newGene_1732	844	744	100	46	3.74056	4.01453	0.342041	0.186368	3.19791e-18	-3.34261	down
ENSMUSG00000029125	Stx18	664	840	2216	2002	3.33344	5.10983	17.6137	10.0861	1.66726e-14	1.57972	up
ENSMUSG00000038347	Tcte2	37	14	80	99	0.327298	0.22304	0.815877	0.923645	0.00899563	1.90612	up
ENSMUSG00000020407	Upp1	127	83	20	27	1.66724	1.02559	0.216554	0.277939	0.000927288	-2.06773	down
ENSMUSG00000020400	Tnip1	464	484	1086	1083	2.48863	2.67773	5.38471	5.11967	1.41273e-11	1.28605	up
ENSMUSG00000020402	Vdac1	12900	12483	5624	5698	94.6332	96.2342	38.2951	36.8983	6.6951e-19	-1.07248	down
ENSMUSG00000028654	Mycl	309	551	78	128	1.35519	2.52838	0.30399	0.49087	6.82294e-06	-1.97871	down
ENSMUSG00000025153	Fasn	85397	81250	11131	11148	126.864	126.508	15.3925	14.5368	1.1632e-134	-2.81052	down
ENSMUSG00000008373	Prpf31	485	654	1194	1172	2.29033	3.39407	5.31595	4.87501	1.28357e-06	1.14523	up
ENSMUSG00000049823	Zbtb12	295	255	22	18	3.05653	2.56903	0.765522	0.598218	2.44386e-17	-3.68706	down
ENSMUSG00000038967	Pdk2	6756	7240	3060	2951	44.49	50.0432	18.707	17.1667	8.35984e-16	-1.12717	down
ENSMUSG00000028389	Zfp37	295	409	44	33	1.24669	1.81683	0.170863	0.12037	2.50216e-14	-3.10016	down
ENSMUSG00000032067	Pts	1873	1818	859	832	28.849	30.095	12.0166	10.8859	3.81459e-10	-1.03341	down
ENSMUSG00000032066	Bco2	1366	1378	541	674	9.53789	10.0941	3.50436	4.15845	4.54492e-08	-1.08573	down
ENSMUSG00000052496	Pkdrej	172	223	77	32	0.358105	0.487999	0.148281	0.059184	0.00244716	-1.75799	down
ENSMUSG00000068452	Duox2	21	7	235	135	0.04934	0.016408	0.527582	0.286705	6.53215e-09	3.82747	up
ENSMUSG00000005338	Cadm3	183	84	15	16	0.523048	0.250606	0.039575	0.039973	7.20027e-06	-3.01016	down
ENSMUSG00000032932	Hspa13	2545	3458	12060	16126	8.89907	12.6918	39.1854	49.8438	1.19773e-27	2.31774	up
Mus_musculus_newGene_74	Mus_musculus_newGene_74	21	23	102	98	0.237443	0.301158	0.976368	0.827522	8.84822e-05	2.27665	up
ENSMUSG00000023122	Sult1c2	614	361	4	6	4.91852	3.02959	0.029662	0.042432	4.8125e-27	-6.51327	down
ENSMUSG00000029247	Paics	17309	14545	6132	7648	105.745	93.3061	34.5251	41.0337	2.37455e-11	-1.11828	down
ENSMUSG00000029246	Ppat	3431	2509	992	1201	12.4642	9.67081	3.37241	3.94175	2.81614e-10	-1.3456	down
Mus_musculus_newGene_273	Mus_musculus_newGene_273	290	330	71	55	2.41863	2.88447	0.544796	0.405505	2.66727e-09	-2.20512	down
ENSMUSG00000039670	Oxld1	378	437	101	127	6.93333	8.36383	1.69566	2.02428	2.76716e-08	-1.7489	down
ENSMUSG00000045094	Arhgef37	730	1027	126	185	1.9928	2.93603	0.317352	0.444656	8.68345e-15	-2.41236	down
ENSMUSG00000061808	Ttr	329158	323819	94195	84970	4105.29	4238.89	1090.85	936.344	1.88462e-41	-1.77212	down
Mus_musculus_newGene_2021	Mus_musculus_newGene_2021	3825	3063	1394	1200	6.39666	5.32379	2.19184	2.04626	9.82494e-12	-1.31343	down
ENSMUSG00000057068	Fam47e	1952	1721	733	783	22.2528	20.2006	7.71989	7.89213	6.82181e-12	-1.18446	down
ENSMUSG00000057069	Ero1b	7066	6603	11958	13745	25.558	24.9925	39.4005	42.795	1.01874e-13	1.00194	up
ENSMUSG00000038539	Atf5	5702	9167	17176	16296	46.4434	78.3741	129.924	117.301	2.12142e-07	1.26036	up
ENSMUSG00000030775	Trat1	6	0	676	847	0.018983	0	2.02831	2.50749	3.55515e-06	8.08763	up
ENSMUSG00000037270	4932438A13Rik	3878	3368	5822	8004	7.9955	7.47251	8.40697	8.88071	1.29e-07	1.0213	up
ENSMUSG00000019731	Slc35e1	2250	2754	7210	9998	7.59224	9.75496	22.592	29.8098	5.3316e-20	1.8687	up
ENSMUSG00000019737	Syne4	109	117	319	329	1.20265	1.33286	3.3079	3.20139	2.2949e-07	1.61112	up
ENSMUSG00000019734	Tmc4	258	285	66	74	1.74444	2.03268	0.383431	0.424382	2.27814e-07	-1.86515	down
ENSMUSG00000021259	Cyp46a1	191	149	14	2	1.47806	1.238	0.094434	0.025279	1.63476e-08	-4.30438	down
ENSMUSG00000090264	Eif4ebp3	579	960	2526	2189	11.5046	20.0134	46.6168	38.442	8.27538e-10	1.70601	up
ENSMUSG00000022508	Bcl6	3877	4536	1505	790	16.266	19.9746	5.86202	2.928	9.58557e-09	-1.77528	down
ENSMUSG00000022500	Litaf	2297	2861	15980	14083	15.3125	19.8667	98.3582	82.4749	1.37716e-50	2.63545	up
ENSMUSG00000022505	Emp2	641	496	207	221	2.75589	2.23439	0.825449	0.839404	1.53087e-06	-1.31647	down
ENSMUSG00000035757	Selenoo	5618	5441	2681	2265	34.7223	35.1711	15.2675	12.2924	1.14152e-10	-1.06642	down
ENSMUSG00000028028	Alpk1	235	219	6617	5890	0.724245	0.705943	18.9638	16.067	7.5686e-187	4.87793	up
ENSMUSG00000018459	Slc13a3	747	615	2090	1705	3.13256	2.705	8.33195	6.33985	1.43052e-13	1.5743	up
ENSMUSG00000032380	Dapk2	465	604	213	174	3.88449	5.28629	1.64645	1.2821	8.38762e-06	-1.37315	down
ENSMUSG00000032383	Ppib	12660	12571	24653	23268	209.934	218.795	379.602	340.909	9.83485e-16	1.01844	up
ENSMUSG00000032387	Rbpms2	3790	3736	1621	1542	29.6667	30.3469	11.7836	10.612	1.47462e-15	-1.15772	down
ENSMUSG00000068085	Cyp2d11	649	711	212	193	6.03372	6.93615	1.82817	1.58401	1.93308e-11	-1.65508	down
ENSMUSG00000037243	Zfp692	388	459	191	189	3.04778	3.79114	1.40426	1.31322	0.000257707	-1.06516	down
ENSMUSG00000059040	Eno1b	1465	2714	838	901	12.4005	24.1164	6.58071	6.73509	0.000185721	-1.17762	down
Mus_musculus_newGene_1962	Mus_musculus_newGene_1962	4120	5920	1012	456	44.3186	70.8712	10.1345	4.30466	8.1863e-05	-2.67457	down
Mus_musculus_newGene_1961	Mus_musculus_newGene_1961	4408	4008	1700	1631	12.7441	11.7722	5.01159	4.66561	2.66579e-17	-1.24387	down
ENSMUSG00000047867	Gimap6	277	186	94	88	1.80504	1.19871	0.730945	0.683335	0.00275162	-1.25171	down
ENSMUSG00000034248	Slc25a37	5243	3698	1352	1484	19.3693	14.3698	4.54731	4.80039	2.91467e-14	-1.56319	down
ENSMUSG00000034245	Hdac11	3873	3470	1106	942	21.9352	20.6093	5.77428	4.6912	1.1005e-23	-1.74735	down
ENSMUSG00000009108	Gnat2	65	121	462	599	0.486256	0.952171	3.12202	3.96931	1.0839e-11	2.59763	up
ENSMUSG00000008855	Hdac5	1967	2269	894	795	7.73479	9.44112	3.17144	2.70925	1.13458e-10	-1.23392	down
ENSMUSG00000004270	Lpcat3	7262	5571	2347	2962	47.1767	37.9143	14.1311	16.9852	1.55729e-09	-1.18224	down
Mus_musculus_newGene_1349	Mus_musculus_newGene_1349	400	279	0	0	26.6454	19.4496	0	0	5.82892e-12	-10.7556	down
ENSMUSG00000041859	Mcm3	189	185	84	62	0.920735	0.947147	0.378845	0.2657	0.0038008	-1.26164	down
ENSMUSG00000037949	Ano10	612	572	1201	1552	3.41629	3.34151	6.23494	7.72254	3.09838e-10	1.30685	up
ENSMUSG00000051483	Cbr1	5242	4513	1296	1375	62.8212	56.7735	14.4198	14.5215	3.56015e-32	-1.77628	down
Mus_musculus_newGene_3230	Mus_musculus_newGene_3230	30117	33880	8012	6407	114.275	138.902	29.2642	22.0651	1.1571e-31	-2.05584	down
Mus_musculus_newGene_3233	Mus_musculus_newGene_3233	43096	47274	6540	4940	28.6473	31.2485	3.55723	2.56104	1.54073e-54	-2.88166	down
Mus_musculus_newGene_3232	Mus_musculus_newGene_3232	66	65	11	3	1.88619	1.97462	0.295629	0.051176	0.000767564	-3.12446	down
Mus_musculus_newGene_3237	Mus_musculus_newGene_3237	1222	1128	172	223	2.37708	2.11033	0.324681	0.397632	1.33563e-28	-2.48271	down
Mus_musculus_newGene_2184	Mus_musculus_newGene_2184	29	45	540	594	0.131423	0.223807	2.27997	2.39563	2.7785e-33	4.02713	up
ENSMUSG00000021280	Exoc3l4	17	20	76	96	0.072416	0.098631	0.3458	0.38755	0.000312256	2.30552	up
ENSMUSG00000053931	Cnn3	10796	8385	3990	4383	78.2484	63.6859	26.9183	28.2509	1.03604e-10	-1.10313	down
ENSMUSG00000022537	Tmem44	123	96	39	25	0.510601	0.462906	0.16998	0.07536	0.00519048	-1.6767	down
ENSMUSG00000039994	Timeless	161	186	396	317	0.531934	0.66762	1.23509	0.947607	0.000516452	1.13292	up
ENSMUSG00000091705	H2-Q2	149	112	30	44	1.7674	1.39831	0.311794	0.469855	0.00146901	-1.72832	down
ENSMUSG00000030102	Itpr1	3988	3315	5653	8505	6.10964	5.33698	8.09631	11.9216	3.06211e-06	1.04342	up
ENSMUSG00000030107	Usp18	568	642	2394	1108	4.84273	5.82893	18.8737	8.25216	8.73675e-06	1.63375	up
ENSMUSG00000030108	Slc6a13	14829	13880	6076	5716	98.7955	96.8612	37.6663	33.7836	1.69092e-19	-1.19029	down
ENSMUSG00000020805	Slc13a5	17	65	1707	2521	0.074204	0.300507	7.27379	10.1082	3.45771e-10	5.76808	up
ENSMUSG00000020806	Rhbdf2	541	600	2208	2222	2.22357	2.59184	8.43489	8.0776	3.24774e-34	2.04852	up
ENSMUSG00000118506	1700094D03Rik	269	219	62	85	1.28101	1.09543	0.272712	0.357507	3.86911e-05	-1.64084	down
ENSMUSG00000031271	Serpina7	2078	1790	4689	3380	13.7635	12.5049	28.4709	19.7631	1.90112e-07	1.15806	up
ENSMUSG00000030225	Dera	4738	4511	1968	1972	40.6081	40.619	15.7384	14.9085	4.718e-17	-1.13862	down
ENSMUSG00000021048	Mthfd1	16836	17514	6801	6208	77.3116	85.0106	28.954	25.2324	2.36706e-21	-1.30774	down
ENSMUSG00000048482	Bdnf	167	125	41	43	0.618062	0.487051	0.139642	0.140771	0.000561953	-1.70405	down
ENSMUSG00000032776	Mctp2	1323	1037	2293	2554	3.38039	2.77371	5.47459	5.76096	1.96755e-09	1.13074	up
ENSMUSG00000024679	Ms4a6d	40	59	145	158	0.414497	0.645252	1.3957	1.45996	0.000446655	1.70291	up
ENSMUSG00000028494	Plin2	14217	17518	29200	42871	111.588	144.215	212.986	298.556	4.01469e-09	1.26932	up
ENSMUSG00000074254	Cyp2a4	2504	2081	24	19	21.3093	18.5862	0.188189	0.138439	2.4235e-112	-6.64252	down
ENSMUSG00000032194	Kank2	2973	3338	1459	1463	8.77194	10.2996	3.97492	3.79318	2.06927e-10	-1.01953	down
ENSMUSG00000032198	Dock6	1690	1565	526	548	4.09788	4.87866	1.25425	1.34092	2.66225e-18	-1.50746	down
ENSMUSG00000024790	Sac3d1	349	418	211	136	3.57796	4.49081	2.00233	1.23123	0.0054201	-1.04837	down
ENSMUSG00000024799	Tm7sf2	10042	9500	3290	3536	103.441	102.486	31.3739	32.4222	5.30295e-30	-1.42578	down
ENSMUSG00000043923	Ccdc84	1116	952	508	376	7.35335	6.69276	3.14939	2.22767	1.24634e-05	-1.12942	down
ENSMUSG00000024869	Gm49405	727	865	158	142	2.75258	3.43813	0.554854	0.472496	1.47003e-19	-2.31574	down
ENSMUSG00000024866	Acy3	4436	5119	1514	1316	53.3999	65.1495	16.6671	14.1584	3.76937e-21	-1.66254	down
ENSMUSG00000024863	Mbl2	20140	19445	6137	5859	273.559	277.204	77.3943	70.3084	3.22339e-39	-1.62939	down
ENSMUSG00000047126	Cltc	12497	11251	23448	27769	28.3824	26.8075	49.4166	55.7086	2.44562e-17	1.1996	up
ENSMUSG00000078853	Igtp	1424	1373	5717	3194	10.5317	10.6231	39.2939	20.9114	5.57827e-10	1.77127	up
Mus_musculus_newGene_1706	Mus_musculus_newGene_1706	2027	1891	846	847	21.124	20.6866	8.18481	7.79975	5.84988e-12	-1.11793	down
ENSMUSG00000079108	Srp54c	2454	1955	5141	5722	11.0381	8.33077	19.3865	26.1436	1.13322e-16	1.39326	up
Mus_musculus_newGene_3686	Mus_musculus_newGene_3686	75	106	236	161	0.515418	0.793009	1.6988	1.36816	0.00878956	1.22779	up
ENSMUSG00000040732	Erg	305	138	70	38	1.59165	0.738234	0.334347	0.156004	0.00118304	-1.93257	down
ENSMUSG00000025225	Nfkb2	375	452	2037	2211	1.67676	2.18922	9.03896	9.22259	4.33876e-39	2.45094	up
ENSMUSG00000025224	Gbf1	3054	3724	7740	9005	7.00555	8.96289	16.4988	18.2548	3.33027e-16	1.39378	up
ENSMUSG00000062995	Ica1	66	45	580	805	0.467069	0.349851	3.98283	5.33145	2.58726e-30	3.73127	up
ENSMUSG00000018623	Mmp7	22	3	242	331	0.292977	0.029073	3.10385	4.0409	6.22967e-12	4.61377	up
ENSMUSG00000019979	Apaf1	78	125	812	1050	0.174532	0.300833	1.71417	2.13464	1.39554e-26	3.28386	up
ENSMUSG00000019975	Ikbip	106	121	350	382	0.805615	1.02547	2.55713	2.3698	5.43117e-09	1.7796	up
ENSMUSG00000019971	Cep290	127	178	245	369	0.22831	0.336052	0.408314	0.589004	0.00605544	1.09473	up
ENSMUSG00000070426	Rnf121	1241	999	2089	2148	8.15776	6.85724	12.6691	12.4361	2.88686e-08	1.01278	up
ENSMUSG00000020309	Chac2	2741	2185	1026	774	32.1437	26.453	11.1538	8.01918	3.71647e-09	-1.35534	down
ENSMUSG00000054277	Arfgap3	822	1509	3243	2979	4.9283	9.29664	17.4326	15.3784	4.09434e-07	1.50577	up
ENSMUSG00000033669	Zfp7	213	184	85	77	1.33469	1.04017	0.478477	0.375173	0.00289635	-1.19907	down
ENSMUSG00000026222	Sp100	360	255	143	142	2.76082	1.83234	1.01242	0.910476	0.0047412	-1.01522	down
ENSMUSG00000026223	Itm2c	1577	1273	3989	4005	10.4593	8.86037	24.5671	23.4716	1.98747e-21	1.58148	up
ENSMUSG00000073424	Cyp4f15	12428	10496	2258	3068	87.2118	77.3969	14.6988	18.9683	1.32545e-27	-2.01616	down
ENSMUSG00000022218	Tgm1	689	540	1391	1805	3.63313	3.01869	6.80784	8.42745	6.11967e-11	1.46933	up
ENSMUSG00000022217	Emc9	894	873	237	223	15.4484	15.8303	3.79331	3.40411	1.82306e-17	-1.84869	down
ENSMUSG00000022215	Fitm1	555	807	106	59	8.44618	12.9022	1.48636	0.787214	2.74094e-14	-2.94952	down
ENSMUSG00000042041	2010003K11Rik	207	591	844	970	2.61897	7.85613	9.931	10.8521	0.00713138	1.26881	up
ENSMUSG00000050014	Apol10b	14	7	423	314	0.083902	0.04652	2.49656	1.76503	5.42948e-26	5.23087	up
ENSMUSG00000041660	Bbox1	12183	10836	5201	4727	48.5858	44.4029	18.2912	15.7855	2.965e-14	-1.11908	down
ENSMUSG00000027630	Tbl1xr1	1687	1994	3879	4311	3.61704	3.91662	7.27464	7.70338	9.76085e-14	1.24357	up
ENSMUSG00000058486	Wdr91	1113	1333	464	409	6.8277	8.12198	2.5223	2.0808	4.19577e-10	-1.39395	down
Mus_musculus_newGene_426	Mus_musculus_newGene_426	0	0	80	128	0	0	0.768971	1.17655	2.91501e-08	9.22978	up
ENSMUSG00000001095	Slc13a2	289	316	22	27	1.77231	2.03024	0.122391	0.143662	2.58445e-18	-3.53608	down
Mus_musculus_newGene_1496	Mus_musculus_newGene_1496	118	109	17	32	0.742401	0.720789	0.099513	0.17627	0.000499585	-2.12509	down
ENSMUSG00000079737	3110001I22Rik	98	80	188	173	0.894529	0.762827	1.59698	1.39856	0.00655502	1.11442	up
ENSMUSG00000075552	Cyp3a41b	1786	395	2	0	12.797	2.96922	0.013279	0	9.81657e-08	-9.97733	down
ENSMUSG00000031422	Morf4l2	4725	5153	12135	12917	38.2293	43.841	90.2637	91.1862	1.93912e-27	1.43348	up
ENSMUSG00000000326	Comt	39756	44757	15808	16205	334.202	391.404	144.2	138.971	2.18992e-22	-1.30943	down
Mus_musculus_newGene_3523	Mus_musculus_newGene_3523	72	140	9	0	0.372469	0.778393	0.037316	0	3.80621e-05	-4.45439	down
Mus_musculus_newGene_3524	Mus_musculus_newGene_3524	6028	6110	1029	612	8.85539	9.29462	1.49572	0.863861	1.90692e-27	-2.78861	down
ENSMUSG00000029009	Mthfr	276	339	1812	2127	0.680928	0.990205	4.50396	5.45189	2.43879e-42	2.76824	up
ENSMUSG00000030032	Wdr54	352	328	120	104	1.11914	1.10244	0.352892	0.291625	2.73235e-06	-1.508	down
ENSMUSG00000028755	Cda	153	169	386	522	2.66628	3.09671	6.26302	8.05351	1.71065e-07	1.58368	up
ENSMUSG00000028757	Ddost	6470	6858	16323	16975	45.1378	50.2165	105.748	104.643	5.43524e-30	1.4123	up
Mus_musculus_newGene_2691	Mus_musculus_newGene_2691	69	64	14	15	0.370009	0.336997	0.057813	0.059102	0.00392065	-2.10536	down
ENSMUSG00000022587	Ly6e	7389	7737	21161	21626	88.7562	93.2834	234.418	221.135	1.23009e-39	1.59176	up
ENSMUSG00000020697	Lig3	925	1125	1867	2332	2.88686	3.912	5.82317	6.79436	5.52439e-08	1.12262	up
Mus_musculus_newGene_2349	Mus_musculus_newGene_2349	43	73	752	1021	0.153219	0.204992	2.19681	2.73912	6.87592e-34	4.01999	up
ENSMUSG00000021775	Nr1d2	11621	7248	2002	3288	36.8735	24.1313	5.89661	9.21509	1.00092e-09	-1.74543	down
ENSMUSG00000064128	Cenpj	153	197	519	444	0.661332	0.822773	2.0703	1.51389	2.76045e-07	1.55277	up
ENSMUSG00000027965	Olfm3	522	471	178	107	1.8375	1.67309	0.619654	0.355837	1.96419e-06	-1.70248	down
ENSMUSG00000023043	Krt18	9236	10714	19617	19971	95.0631	115.746	187.497	181.633	1.1057e-13	1.07965	up
ENSMUSG00000035112	Wnk4	322	301	17	28	1.15419	1.27526	0.055914	0.08715	2.78698e-18	-3.70227	down
Mus_musculus_newGene_678	Mus_musculus_newGene_678	377	309	165	121	1.08331	1.20625	0.434937	0.432711	0.00107093	-1.16539	down
ENSMUSG00000053644	Aldh7a1	33706	33041	9963	10417	228	232.438	61.7804	59.7963	6.51392e-46	-1.61977	down
ENSMUSG00000071711	Mpst	4853	6008	2426	2570	55.2618	70.9111	25.1813	25.3283	3.9719e-09	-1.03026	down
ENSMUSG00000030630	Fah	43783	43717	17033	18166	408.594	428.201	147.595	149.784	2.41936e-26	-1.22235	down
ENSMUSG00000020888	Dvl2	579	552	299	201	2.11659	2.09094	0.912197	0.577275	0.000644335	-1.08063	down
ENSMUSG00000020889	Nr1d1	11204	9706	934	1085	60.9044	55.3784	4.71065	5.20718	1.54783e-106	-3.28107	down
ENSMUSG00000021427	Ssr1	8535	8908	21755	22254	13.6052	14.8529	32.1384	31.4223	2.01629e-32	1.42678	up
ENSMUSG00000020883	Fbxl20	4249	3321	1158	1302	9.12734	7.15379	2.19847	2.15816	4.77051e-17	-1.52921	down
ENSMUSG00000073079	Srp54a	1718	1852	3579	4307	5.69667	6.39004	10.9281	14.7213	3.68475e-14	1.23279	up
ENSMUSG00000042745	Id1	976	453	199	289	14.8781	7.23152	2.81044	3.94241	0.000520433	-1.45739	down
ENSMUSG00000025933	Tmem14a	311	290	32	43	3.84351	3.71599	0.368301	0.449879	3.56152e-14	-2.91233	down
ENSMUSG00000025937	Lactb2	31571	28467	8748	9493	103.913	98.34	26.7346	27.605	1.47542e-38	-1.62681	down
ENSMUSG00000025935	Tram1	12065	11795	22496	23678	60.739	62.3267	105.166	105.413	2.79062e-19	1.0442	up
ENSMUSG00000025934	Gsta3	108587	93113	8763	7916	1203.14	1076.17	90.5064	76.3672	2.14427e-129	-3.50159	down
ENSMUSG00000022623	Shank3	360	217	126	36	0.737466	0.603326	0.233446	0.06367	0.00822546	-1.72408	down
ENSMUSG00000020718	Polg2	636	597	204	123	4.78824	4.65548	1.46248	0.812851	7.28447e-08	-1.81672	down
ENSMUSG00000069874	Irgm2	2150	1736	9790	7990	9.09642	7.75283	38.7277	29.9458	1.04348e-34	2.29006	up
ENSMUSG00000028270	Gbp2	196	163	1692	1257	1.14679	1.00564	9.23129	6.52591	1.7447e-35	3.13506	up
ENSMUSG00000032119	Hinfp	1105	932	234	193	3.26272	3.0204	2.42263	1.80644	2.81379e-19	-2.15887	down
ENSMUSG00000032115	Hyou1	13218	16253	51277	55335	45.0455	58.1001	170.222	176.164	2.35934e-35	1.94485	up
ENSMUSG00000032114	Slc37a4	14095	16591	7252	6376	110.073	139	46.6456	36.4314	1.65895e-10	-1.0783	down
ENSMUSG00000032116	Stt3a	8716	8778	22727	25258	21.9951	23.2275	53.647	56.7543	7.15441e-37	1.54655	up
ENSMUSG00000024713	Pcsk5	626	681	2194	2277	1.3734	1.54035	4.47666	4.4442	2.72155e-30	1.86558	up
ENSMUSG00000060519	Tor3a	141	170	648	680	0.634005	0.802454	2.7031	2.68405	6.0855e-18	2.18489	up
ENSMUSG00000040963	Asgr2	12589	11157	5032	4964	137.23	127.449	51.0733	47.795	9.77885e-18	-1.15508	down
ENSMUSG00000003283	Hck	65	84	212	233	0.448843	0.620436	1.38267	1.45361	2.04095e-05	1.66818	up
ENSMUSG00000034471	Caskin2	736	795	3708	2906	2.24171	2.52356	10.4161	7.72452	1.34398e-28	2.20578	up
ENSMUSG00000035704	Alg8	405	480	1031	1147	2.93808	3.65083	6.94366	7.35178	4.99589e-11	1.38914	up
ENSMUSG00000041798	Gck	3564	9855	694	268	24.3979	67.7957	4.19724	1.50781	0.000341323	-3.70513	down
Mus_musculus_newGene_3177	Mus_musculus_newGene_3177	4	4	74	100	0.021808	0.018728	0.404038	0.524519	4.69928e-08	4.53165	up
ENSMUSG00000056131	Pgm3	938	1035	4560	4401	5.20083	6.03489	23.578	21.6126	6.75006e-51	2.27531	up
ENSMUSG00000047793	Sned1	1600	1886	177	182	2.59366	3.20007	0.264702	0.258728	1.69092e-53	-3.18877	down
ENSMUSG00000015312	Gadd45b	67	39	272	290	0.767399	0.482643	2.89807	3.01817	1.27504e-09	2.50072	up
ENSMUSG00000056487	Mettl7a2	72	100	16	26	0.581628	0.847058	0.117537	0.184956	0.00448208	-1.94852	down
ENSMUSG00000052726	Kcnt2	133	113	1211	1917	0.344061	0.300671	3.45319	4.59341	7.35027e-42	3.75599	up
ENSMUSG00000061292	Cyp3a59	5790	4457	273	193	43.1033	34.8313	1.8949	1.26915	1.76209e-79	-4.36117	down
ENSMUSG00000028536	2610528J11Rik	454	545	130	151	7.80965	9.72641	2.0736	2.26608	1.89636e-09	-1.7405	down
ENSMUSG00000049303	Syt12	145	180	1528	2073	0.596821	0.779501	5.85878	7.56473	6.92816e-50	3.55719	up
ENSMUSG00000037071	Scd1	362576	560527	33575	78670	1110.01	1801.05	95.4871	212.849	1.89734e-05	-2.96078	down
ENSMUSG00000031958	Ldhd	9331	9384	22397	28114	60.7223	64.0907	135.331	161.651	3.40282e-24	1.52171	up
ENSMUSG00000031955	Bcar1	3215	3764	1230	1252	15.1797	18.651	5.38709	5.22064	5.50995e-17	-1.4006	down
ENSMUSG00000028849	Map7d1	2104	2250	5229	5087	9.54146	10.8028	22.1053	20.5915	3.77049e-21	1.33658	up
ENSMUSG00000029467	Atp2a2	13037	13151	37479	44269	39.1414	41.1244	105.118	115.934	5.17198e-39	1.73232	up
ENSMUSG00000032633	Flcn	3597	2914	1427	1356	15.5987	13.2243	5.72431	5.17241	1.67839e-10	-1.13204	down
ENSMUSG00000042770	Hebp1	12514	12167	5195	4535	174.954	178.538	67.4337	56.0137	3.32983e-17	-1.24882	down
ENSMUSG00000025742	Prps2	1359	1110	602	524	5.43314	4.65628	2.23525	1.84971	2.68192e-06	-1.03762	down
ENSMUSG00000074115	Saa1	712	1997	562727	532891	17.2838	50.8926	12691.3	11436	1.33094e-34	8.74622	up
ENSMUSG00000028334	Nans	690	834	2452	2401	4.68174	5.94123	15.4555	14.3978	4.79526e-22	1.7623	up
ENSMUSG00000028339	Col15a1	215	426	1416	1997	0.612842	1.28165	3.7748	5.07555	4.27351e-13	2.49635	up
ENSMUSG00000032096	Arcn1	14151	13420	25137	27785	51.4023	51.1645	84.7849	89.1774	3.60239e-17	1.03202	up
ENSMUSG00000032098	Treh	95	174	382	516	0.679649	1.33006	2.56026	3.33285	4.88741e-06	1.82408	up
ENSMUSG00000020102	Slc16a7	7670	5049	2485	2766	12.0425	7.97302	3.83424	4.27398	1.15534e-07	-1.18266	down
ENSMUSG00000020108	Ddit4	218	302	717	753	1.83156	2.66319	5.60435	5.60273	3.43775e-09	1.5889	up
ENSMUSG00000024905	Tesmin	121	63	15	21	0.794416	0.432291	0.089803	0.115021	0.00161673	-2.26068	down
ENSMUSG00000036158	Prickle1	146	90	25	35	0.518119	0.333334	0.079546	0.110257	0.00172418	-1.88393	down
Mus_musculus_newGene_80	Mus_musculus_newGene_80	42	27	101	116	0.35621	0.285588	0.796159	0.94052	0.00208631	1.74595	up
Mus_musculus_newGene_82	Mus_musculus_newGene_82	916	760	1975	1510	1.30771	1.13906	2.61912	1.90544	5.91663e-07	1.15283	up
ENSMUSG00000033307	Mif	7108	6816	2808	2326	193.25	194.504	70.8861	55.8618	8.50036e-16	-1.34464	down
ENSMUSG00000026502	Desi2	1243	1060	2194	2702	2.08614	1.88134	3.4669	4.14065	2.08407e-10	1.17875	up
ENSMUSG00000012428	Steap4	4974	5947	275911	245057	23.3182	29.2602	1201.14	1015.13	3.82133e-278	5.66853	up
ENSMUSG00000012422	Tmem167	2342	2651	5713	6281	4.49121	5.22824	9.99223	10.1074	1.63048e-19	1.35454	up
ENSMUSG00000029859	Epha1	5024	3849	1866	1912	22.7076	18.2725	7.82536	7.63189	3.82285e-10	-1.13813	down
ENSMUSG00000006678	Pola1	303	226	88	81	0.835757	0.653831	0.223673	0.197239	4.71854e-05	-1.5514	down
ENSMUSG00000010064	Slc38a3	136268	123019	49048	56601	760.135	708.338	248.411	275.202	1.43645e-19	-1.20418	down
Mus_musculus_newGene_2615	Mus_musculus_newGene_2615	942	888	217	176	2.95297	2.92009	0.62951	0.485057	7.84123e-19	-2.12457	down
ENSMUSG00000052684	Jun	581	561	1681	1598	2.69224	2.7263	7.23789	6.54696	1.10736e-20	1.61471	up
ENSMUSG00000035836	Ugt2b1	50500	48175	5206	5134	290.317	290.676	27.7882	26.0739	5.76436e-162	-3.16177	down
ENSMUSG00000053080	2700081O15Rik	213	253	39	46	0.63102	0.786649	0.105523	0.118582	1.01454e-08	-2.3653	down
ENSMUSG00000052974	Cyp2f2	90865	98575	11636	12287	721.263	821.168	85.8	86.2427	3.9784e-122	-2.89431	down
ENSMUSG00000068551	Zfp467	1888	1942	423	412	9.52443	10.7837	1.98019	1.73495	1.31283e-34	-2.10527	down
ENSMUSG00000052837	Junb	2130	1787	6783	5994	17.4105	15.3348	51.4976	43.2984	3.21189e-27	1.80063	up
ENSMUSG00000110206	Flt3l	284	355	105	157	3.93634	4.97803	1.22399	1.74942	0.00150666	-1.19991	down
ENSMUSG00000020022	Ndufa12	1513	1379	572	476	37.1054	35.1643	11.4925	9.46052	3.63619e-11	-1.36956	down
ENSMUSG00000021999	Cpb2	22813	22557	96377	113241	228.468	237.097	896.224	1002.02	1.73441e-71	2.29819	up
ENSMUSG00000021994	Wnt5a	31	52	121	188	0.06464	0.113851	0.236007	0.349461	0.000307202	1.98062	up
ENSMUSG00000039865	Slc44a3	589	505	293	176	3.32094	2.989	1.53509	0.874751	0.00163321	-1.12297	down
ENSMUSG00000026072	Il1r1	3349	3349	30562	26118	8.51425	9.16565	72.14	58.6603	1.15424e-101	3.17522	up
ENSMUSG00000030214	Plbd1	2082	2174	3766	4320	15.3176	16.7875	25.7336	28.0873	9.75341e-12	1.01615	up
ENSMUSG00000030219	Erp27	13	6	85	136	0.175472	0.079662	1.13198	1.72082	3.35687e-07	3.62968	up
ENSMUSG00000038022	Mindy4	287	203	77	84	1.03634	0.805076	0.248472	0.295912	0.000158169	-1.51231	down
Mus_musculus_newGene_1685	Mus_musculus_newGene_1685	218	260	63	68	1.44315	1.8068	0.386499	0.389319	4.38852e-06	-1.77719	down
ENSMUSG00000045752	Tssc4	478	727	1341	1311	6.51117	9.88642	17.1385	15.7496	3.82874e-06	1.22786	up
ENSMUSG00000000876	Pxmp4	4602	4594	8472	9397	28.3351	30.5964	52.1769	52.422	3.47371e-16	1.0493	up
Mus_musculus_newGene_3858	Mus_musculus_newGene_3858	2538	2356	470	1069	5.50486	5.35989	0.942279	2.0498	4.76675e-06	-1.58597	down
Mus_musculus_newGene_3853	Mus_musculus_newGene_3853	1401	1201	37	16	33.9357	30.6412	0.748602	0.32096	1.21467e-57	-5.51956	down
Mus_musculus_newGene_2895	Mus_musculus_newGene_2895	28	44	150	188	0.126196	0.209578	0.642867	0.760698	2.99487e-06	2.31819	up
Mus_musculus_newGene_2898	Mus_musculus_newGene_2898	0	0	86	93	0	0	0.289018	0.298075	6.41274e-08	9.01779	up
ENSMUSG00000027805	Pfn2	142	150	439	369	0.890548	1.02387	2.61781	2.12219	2.02814e-07	1.56232	up
ENSMUSG00000064061	Dzip3	125	128	249	359	0.384532	0.39034	0.731704	1.03874	0.000149376	1.3527	up
ENSMUSG00000041261	Car8	10777	7235	1927	1631	41.3734	29.1523	6.86684	5.53154	5.50059e-24	-2.2429	down
ENSMUSG00000031508	Ankrd10	764	912	391	374	3.11218	4.20855	1.47765	1.68197	9.00154e-06	-1.03997	down
ENSMUSG00000031502	Col4a1	857	678	9571	9592	1.9151	1.58718	19.869	18.9499	3.84247e-121	3.73563	up
ENSMUSG00000022150	Dab2	711	385	245	190	2.56315	1.2814	0.926959	0.547978	0.00167169	-1.23407	down
Mus_musculus_newGene_2795	Mus_musculus_newGene_2795	43	131	3166	4441	0.066212	0.222024	4.84732	6.44606	3.96958e-12	5.53151	up
Mus_musculus_newGene_2798	Mus_musculus_newGene_2798	4	2	123	174	0.012935	0.006903	0.417843	0.610645	1.34848e-12	5.71869	up
Mus_musculus_newGene_2425	Mus_musculus_newGene_2425	237	309	17	21	0.874962	1.19085	0.059714	0.051989	1.72605e-16	-3.75599	down
ENSMUSG00000038704	Aspdh	5554	6171	2892	2582	83.1578	97.6367	40.7911	34.9639	5.98963e-10	-1.00605	down
ENSMUSG00000025317	Car5a	5488	5450	422	315	64.9886	67.7403	4.63312	3.2918	1.70083e-85	-3.7962	down
ENSMUSG00000039270	Megf9	2046	1650	3520	4593	3.82007	3.23276	6.101	7.58225	5.27316e-10	1.22458	up
ENSMUSG00000060591	Ifitm2	4874	4903	26529	27641	110.052	116.197	556.288	551.517	1.73129e-109	2.56168	up
ENSMUSG00000068742	Cry2	3023	2643	957	1130	11.3918	10.4349	3.41551	3.74866	2.68203e-15	-1.34979	down
ENSMUSG00000037541	Shank2	796	680	269	268	1.3192	1.1872	0.410671	0.399411	4.89502e-09	-1.36551	down
ENSMUSG00000034780	B3galt1	1309	891	22316	24315	4.66068	2.92624	70.3592	78.4048	2.13537e-119	4.4993	up
ENSMUSG00000035780	Ugt2a3	24187	20251	3465	4024	168.996	148.509	22.4742	24.8369	2.68039e-61	-2.4774	down
ENSMUSG00000001119	Col6a1	347	267	128	151	1.25162	1.01061	0.426696	0.478913	0.00257882	-1.04596	down
ENSMUSG00000027746	Ufm1	3795	4097	7624	8576	11.5299	13.1456	21.6672	23.0009	9.57151e-16	1.12776	up
ENSMUSG00000034708	Grn	7808	8372	22833	24922	50.0571	56.3479	143.624	140.788	1.21482e-38	1.65207	up
ENSMUSG00000025981	Coq10b	6447	3544	1362	1693	55.2259	31.9838	10.8091	12.8367	1.13645e-08	-1.61601	down
ENSMUSG00000057596	Trim30d	359	385	1037	576	1.73056	1.98896	5.10425	2.60285	0.000539119	1.21517	up
ENSMUSG00000051344	Plekhm3	66	106	405	515	0.115411	0.210361	0.654333	0.79848	3.26739e-12	2.50595	up
ENSMUSG00000061882	Ccdc62	109	141	253	248	0.404696	0.554955	0.883715	0.823302	0.00269023	1.09381	up
ENSMUSG00000037780	Mbl1	7845	7677	14371	16762	74.2669	94.9291	126.417	152.186	3.19194e-16	1.09455	up
ENSMUSG00000020964	Sel1l	10093	10374	24227	30068	25.0022	27.7411	56.8724	66.9451	4.32087e-24	1.49682	up
ENSMUSG00000030062	Rpn1	9079	10231	28044	30031	36.9651	43.7188	106.045	108.031	2.44017e-35	1.6791	up
ENSMUSG00000021364	Elovl2	45254	47506	19622	23142	174.334	192.093	70.1868	78.7608	8.71897e-14	-1.02731	down
ENSMUSG00000021365	Nedd9	147	154	1023	1002	0.466184	0.516453	3.03524	2.82961	1.51296e-39	2.84232	up
ENSMUSG00000021361	Tmem14c	7044	6155	2741	2638	113.993	104.532	41.1846	37.7208	1.95699e-16	-1.20146	down
ENSMUSG00000029177	Cenpa	306	253	37	54	3.89216	3.3513	0.412725	0.644316	3.65286e-10	-2.52904	down
ENSMUSG00000022475	Hdac7	401	255	101	102	1.41765	0.950305	0.327032	0.313579	3.2485e-05	-1.5973	down
ENSMUSG00000035545	Leng8	6285	6435	3360	2094	18.8568	20.2367	9.5017	5.69099	9.74923e-06	-1.12388	down
ENSMUSG00000038312	Edem2	3899	4565	10730	10629	25.1813	30.9466	64.3512	60.6584	3.34701e-21	1.42671	up
ENSMUSG00000029368	Alb	6541703	5656435	2008385	2207293	47573.5	43174.5	13561.9	14182.9	1.27847e-27	-1.44083	down
ENSMUSG00000032018	Sc5d	65471	50119	21043	20128	241.823	188.216	64.8387	62.5535	9.15529e-17	-1.39474	down
ENSMUSG00000032014	Oaf	22029	23383	8750	10822	129.446	144.318	47.6727	56.1418	1.32929e-13	-1.12515	down
ENSMUSG00000032010	Usp2	4332	2933	81	89	21.2579	14.8683	0.295218	0.355795	4.0895e-102	-5.32349	down
ENSMUSG00000043885	Slc36a4	400	466	1041	1382	0.902597	1.1266	2.18651	2.78027	1.57673e-11	1.57217	up
ENSMUSG00000024451	Arap3	745	550	212	156	2.17312	1.77958	0.541078	0.409002	4.05896e-08	-1.71766	down
ENSMUSG00000053716	Dusp7	313	210	115	125	1.45283	1.02657	0.487809	0.506505	0.00918651	-1.03003	down
ENSMUSG00000024987	Cyp26a1	924	752	156	197	7.62734	6.51044	1.19531	1.43471	3.1011e-17	-2.15623	down
ENSMUSG00000024981	Acsl5	28781	26381	11198	12218	115.945	108.907	41.2786	44.9047	3.65007e-20	-1.14448	down
ENSMUSG00000049109	Themis	22	11	169	145	0.063627	0.032341	0.472823	0.372794	3.90367e-09	3.34718	up
ENSMUSG00000032902	Slc16a1	2920	2734	11480	11797	9.75777	9.58716	35.6221	34.8324	1.13515e-67	2.13385	up
ENSMUSG00000026580	Selp	354	307	156	125	1.58911	1.41037	0.619387	0.473965	0.000728168	-1.13865	down
ENSMUSG00000027180	Fbxo3	11260	8152	4165	4584	38.7984	29.1446	12.986	13.6118	3.3904e-08	-1.05658	down
ENSMUSG00000033059	Pygb	217	169	357	465	0.817864	0.66926	1.25433	1.55233	0.00017917	1.18109	up
ENSMUSG00000070720	Tmem200b	119	101	24	18	1.34813	1.18251	0.237002	0.167676	0.000110056	-2.29335	down
ENSMUSG00000058900	Rsl1	151	159	315	332	0.869398	0.949963	1.69541	1.69824	0.0001346	1.15278	up
ENSMUSG00000034088	Hdlbp	32117	32903	59431	67434	88.0671	94.8175	160.257	170.914	5.32881e-17	1.05478	up
ENSMUSG00000034334	Fam151b	245	217	79	72	3.11046	2.87882	0.922088	0.794182	6.38906e-05	-1.51953	down
ENSMUSG00000005893	Nr2c2	1154	545	1344	2340	2.38564	1.26398	2.43163	4.05338	0.00222169	1.20679	up
ENSMUSG00000009293	Ube2g2	1521	1800	3756	3849	11.1619	13.8204	25.5271	25.0333	6.82836e-15	1.28614	up
Mus_musculus_newGene_1586	Mus_musculus_newGene_1586	698	604	228	225	1.45012	1.49682	0.322569	0.381167	4.1779e-09	-1.42994	down
Mus_musculus_newGene_1582	Mus_musculus_newGene_1582	232	357	14627	17926	0.615718	0.993283	37.1521	42.5637	9.06768e-155	5.87554	up
ENSMUSG00000041037	Irgq	750	966	2519	3329	1.82208	2.46505	5.68721	7.15108	2.64213e-17	1.85601	up
ENSMUSG00000044646	Zbtb7c	67	163	549	384	0.216045	0.554025	1.80197	1.20749	1.19028e-05	2.11163	up
ENSMUSG00000058126	Tpm3-rs7	165	161	391	437	1.13035	1.1637	2.49806	2.65568	2.04494e-07	1.43579	up
ENSMUSG00000041698	Slco1a1	39571	32287	2494	2472	157.093	134.811	9.18088	8.34629	4.73674e-144	-3.76132	down
ENSMUSG00000047694	Yipf6	2381	2223	4303	5187	6.75788	6.62231	11.34	13.0428	3.16573e-13	1.13385	up
Mus_musculus_newGene_3349	Mus_musculus_newGene_3349	81	115	849	669	0.12258	0.192073	1.23204	0.931973	3.06669e-23	3.04651	up
ENSMUSG00000020017	Hal	32883	35749	14146	16813	91.4457	104.348	36.5273	41.3258	2.77125e-13	-1.05906	down
Mus_musculus_newGene_1865	Mus_musculus_newGene_1865	254	384	8	10	2.59251	4.63083	0.026411	0.035055	3.19365e-21	-5.05932	down
ENSMUSG00000021917	Spcs1	2086	1936	4435	4770	43.1247	42.3944	85.841	87.6702	6.3044e-21	1.28629	up
ENSMUSG00000021918	Nek4	588	647	1393	1558	2.10071	2.49151	4.83743	4.98866	2.24855e-13	1.34695	up
ENSMUSG00000071037	Camkmt	46	42	117	104	0.419986	0.405016	1.00573	0.849305	0.00633776	1.42251	up
ENSMUSG00000071036	Gm10309	5	0	368	660	0.02951	0	2.51557	4.30092	3.07996e-06	7.77838	up
ENSMUSG00000049225	Pdp1	80	39	385	354	0.278656	0.1409	1.33828	1.10051	8.6623e-11	2.73162	up
ENSMUSG00000036594	H2-Aa	743	503	126	157	9.73051	6.92158	1.52894	1.81805	8.89923e-11	-2.04612	down
ENSMUSG00000052040	Klf13	4122	4110	1359	1151	9.83939	10.2294	3.09389	2.58886	5.39776e-22	-1.61938	down
ENSMUSG00000104713	Gbp6	581	645	6488	5171	2.46404	2.59637	24.4841	18.8514	3.10326e-70	3.34381	up
ENSMUSG00000031169	Porcn	290	216	127	106	1.98969	1.4739	0.749345	0.696839	0.00872281	-1.02284	down
ENSMUSG00000031167	Rbm3	3721	2559	6133	5853	35.2564	25.9144	62.8327	58.0775	1.14325e-06	1.02779	up
ENSMUSG00000021287	Xrcc3	307	409	146	101	1.87494	2.70227	0.82263	0.544623	0.000172569	-1.44112	down
ENSMUSG00000021286	Zfyve21	2332	2434	1146	1026	26.899	29.6244	12.1533	10.2516	1.3102e-09	-1.04056	down
ENSMUSG00000021281	Tnfaip2	788	1285	2962	3992	3.27983	5.37395	11.1268	14.3765	2.64057e-11	1.83143	up
ENSMUSG00000021135	Slc10a1	59279	56267	12550	10581	503.695	502.697	100.459	80.0391	1.68356e-49	-2.22587	down
ENSMUSG00000021133	Susd6	3407	2964	13017	12916	10.1483	9.28937	36.3536	34.3681	4.63263e-55	2.11841	up
Mus_musculus_newGene_831	Mus_musculus_newGene_831	373	166	100	67	0.655688	0.304912	0.162129	0.102985	0.00323225	-1.5887	down
ENSMUSG00000037493	Cib2	269	228	71	92	2.77551	2.46434	0.675401	0.836605	6.88879e-05	-1.51784	down
ENSMUSG00000027577	Chrna4	1383	1269	4	2	5.36354	4.9551	0.010089	0.005726	1.87399e-42	-8.69506	down
ENSMUSG00000058729	Lin9	314	294	128	125	1.46846	1.44169	0.553799	0.515675	0.000260109	-1.17214	down
ENSMUSG00000027394	Ttl	535	495	190	212	1.80753	1.75372	0.600727	0.61181	9.42681e-07	-1.2659	down
ENSMUSG00000005514	Por	30735	19879	8830	14347	174.508	118.36	46.0894	72.0918	0.000206884	-1.03774	down
ENSMUSG00000026623	Lpgat1	10637	11723	45653	63038	21.9484	25.3681	88.6565	118.197	5.99066e-40	2.36873	up
ENSMUSG00000006732	Mettl1	341	497	1174	1101	3.27473	4.92723	9.91816	9.75348	4.53802e-09	1.5315	up
ENSMUSG00000028911	Srsf4	4342	4195	1818	1479	31.92	31.9453	12.3406	9.40591	8.67002e-13	-1.27766	down
ENSMUSG00000017167	Cntnap1	59	81	336	359	0.15992	0.230023	0.847808	0.862315	4.96109e-12	2.40138	up
Mus_musculus_newGene_1135	Mus_musculus_newGene_1135	188	315	26	20	1.3293	2.31494	0.171093	0.110677	3.25239e-11	-3.35986	down
ENSMUSG00000001288	Rarg	253	208	73	97	1.41236	1.21273	0.360301	0.452639	0.000685731	-1.34882	down
ENSMUSG00000078964	Ces1b	8454	5855	1853	2191	63.6668	46.2778	12.9574	14.5766	1.35167e-16	-1.73048	down
ENSMUSG00000000776	Polr3d	434	491	953	834	3.16906	3.77209	6.47747	5.39671	4.32167e-06	1.04305	up
Mus_musculus_newGene_2715	Mus_musculus_newGene_2715	250	269	37	29	0.381331	0.430134	0.052021	0.038509	2.92547e-12	-2.88159	down
Mus_musculus_newGene_2714	Mus_musculus_newGene_2714	169	146	14	22	2.03831	1.57361	0.107456	0.28286	1.82595e-08	-3.03985	down
ENSMUSG00000025396	Hsd17b6	22879	16346	1396	493	242.077	178.504	14.0096	4.41128	5.88138e-08	-4.26957	down
ENSMUSG00000019845	Tube1	97	92	33	18	0.401044	0.487064	0.144785	0.07042	0.00655712	-1.79151	down
ENSMUSG00000020275	Rel	425	306	621	968	0.840944	0.635575	1.14165	1.69389	0.00012893	1.20908	up
ENSMUSG00000020272	Stk10	77	116	220	246	0.226294	0.357839	0.599751	0.638148	0.000894108	1.36025	up
ENSMUSG00000020271	Fbxw11	1698	1576	2960	3732	6.6652	6.52277	10.8798	13.1847	1.08053e-10	1.12121	up
ENSMUSG00000037894	H2az1	3280	2767	1303	1191	46.9384	40.5405	16.8516	14.6946	1.29109e-11	-1.18338	down
ENSMUSG00000036411	9530077C05Rik	7	14	397	366	0.040423	0.096191	2.50684	2.14456	2.37285e-29	5.27487	up
ENSMUSG00000027808	Serp1	27947	27375	62983	70662	89.6529	92.1706	187.607	200.282	1.042e-29	1.36337	up
ENSMUSG00000027800	Tm4sf1	484	429	128	105	2.40383	2.41611	0.682541	0.632841	5.34827e-10	-1.87539	down
ENSMUSG00000030157	Clec2d	3091	3477	1319	1372	37.691	44.4896	14.9273	14.7772	5.23089e-14	-1.19638	down
ENSMUSG00000031824	6430548M08Rik	224	366	1338	1722	0.630553	1.04056	3.36625	4.0624	1.49475e-17	2.46083	up
ENSMUSG00000105340	Gm42878	356	381	191	110	1.10065	1.23636	0.546854	0.298571	0.00289231	-1.19406	down
ENSMUSG00000035258	Abi3bp	139	69	27	31	0.73081	0.204223	0.074615	0.076498	0.0086695	-1.74743	down
ENSMUSG00000026864	Hspa5	64531	68481	176286	186769	311.901	335.795	753.869	782.594	4.69164e-38	1.5397	up
ENSMUSG00000045658	Pid1	5520	5578	20679	20063	31.4746	33.5896	109.701	101.016	1.20138e-58	1.96873	up
ENSMUSG00000042686	Jph1	184	114	51	49	0.565348	0.366353	0.145184	0.131174	0.00448253	-1.47977	down
ENSMUSG00000042680	Garem1	1724	1487	4078	5364	5.17797	4.68365	11.3707	14.2373	5.3374e-19	1.64583	up
ENSMUSG00000074207	Adh1	139126	128011	16221	12910	1379.32	1332.02	149.318	113.087	6.47418e-78	-3.10132	down
ENSMUSG00000024165	Jpt2	1923	1977	7186	7269	10.65	11.4845	36.9457	35.5501	2.07073e-53	1.98191	up
ENSMUSG00000024164	C3	382403	347325	2021786	2262616	1101.34	1049.89	5406.73	5757.59	4.77031e-102	2.6451	up
ENSMUSG00000042350	Arel1	2308	2369	5676	6367	6.29941	6.77385	14.3962	15.3773	1.83636e-26	1.45515	up
ENSMUSG00000024292	Cyp4f14	20457	18602	1060	1042	136.749	130.815	6.56717	6.17341	9.74278e-222	-4.12283	down
ENSMUSG00000024299	Adamts10	506	467	188	198	1.90698	1.8123	0.643455	0.651059	2.09811e-06	-1.24174	down
ENSMUSG00000024298	Zfp871	8662	5366	2694	3258	11.8717	7.70133	3.41354	3.94236	3.50996e-06	-1.14384	down
ENSMUSG00000024833	Pola2	528	559	209	178	3.5753	3.9571	1.22873	0.968231	2.16396e-07	-1.39646	down
ENSMUSG00000030834	Abcc6	15001	14965	3814	3395	44.6103	46.707	10.5303	8.9203	3.40507e-44	-1.96182	down
ENSMUSG00000030835	Nomo1	2671	2666	5461	6537	9.27949	9.7199	17.6194	20.0667	2.38123e-17	1.25867	up
ENSMUSG00000040441	Slc26a10	488	212	37	40	2.30308	1.04663	0.158722	0.163847	1.00135e-09	-3.08785	down
ENSMUSG00000026473	Glul	64064	49133	15815	14315	339.897	273.777	77.8602	67.0581	4.98378e-26	-1.81431	down
ENSMUSG00000026475	Rgs16	3661	6544	203	188	23.1484	43.434	1.18989	1.04712	1.0762e-58	-4.61679	down
Mus_musculus_newGene_2994	Mus_musculus_newGene_2994	379	241	67	69	2.4074	1.90872	0.381651	0.373188	1.80099e-07	-2.09395	down
Mus_musculus_newGene_2993	Mus_musculus_newGene_2993	0	3	76	120	0	0.015522	0.601199	0.83768	5.04332e-08	6.11342	up
Mus_musculus_newGene_2992	Mus_musculus_newGene_2992	1644	1740	3082	3519	35.7165	39.6589	62.1706	67.5668	7.91393e-12	1.05416	up
Mus_musculus_newGene_845	Mus_musculus_newGene_845	191	217	75	84	0.790526	0.855641	0.217041	0.264355	0.00139754	-1.26937	down
ENSMUSG00000023067	Cdkn1a	16	58	4755	5194	0.118666	0.478814	34.3501	35.6188	1.54375e-17	7.15488	up
ENSMUSG00000026014	Raph1	7165	4954	20072	20313	11.0007	8.8082	34.2548	32.0692	3.87953e-21	1.83107	up
Mus_musculus_newGene_2923	Mus_musculus_newGene_2923	0	2	88	121	0	0.008404	0.811624	0.895104	5.83011e-08	6.79388	up
Mus_musculus_newGene_1743	Mus_musculus_newGene_1743	17	19	104	117	0.127817	0.159778	0.678039	0.651414	2.56738e-06	2.70832	up
ENSMUSG00000037709	Fam13a	3054	2611	376	404	7.80636	7.00524	0.891089	0.910603	3.89509e-58	-2.76811	down
ENSMUSG00000019539	Rcn3	157	168	34	32	1.5837	1.77051	0.322576	0.306639	2.75363e-06	-2.20769	down
ENSMUSG00000041180	Hectd2	6078	5417	360	423	18.9978	18.9755	1.05245	1.2078	8.60427e-126	-3.7846	down
ENSMUSG00000051557	Pusl1	324	277	130	96	3.85335	3.45535	1.43218	1.00918	0.000348871	-1.31467	down
ENSMUSG00000022742	Cpox	7477	7151	13782	16091	35.7072	35.8429	61.1209	67.9003	1.0476e-16	1.12067	up
ENSMUSG00000057895	Zfp105	20	25	90	91	0.146938	0.19109	0.613627	0.59149	0.000554946	2.09896	up
Mus_musculus_newGene_2509	Mus_musculus_newGene_2509	27	18	552	1167	0.626078	0.440069	12.8742	25.7104	8.93106e-34	5.34044	up
ENSMUSG00000052117	D630039A03Rik	894	588	342	218	4.67269	3.22151	1.65854	1.00371	0.000261363	-1.30389	down
ENSMUSG00000039046	Usp6nl	1327	1036	1897	2908	2.62132	2.14805	3.4806	5.07786	1.19691e-05	1.11249	up
ENSMUSG00000039043	Arpin	313	400	1171	1147	2.02756	2.72273	7.06168	6.58187	1.39543e-15	1.7919	up
ENSMUSG00000023904	Hcfc1r1	1338	1444	646	577	21.0319	23.9971	9.54225	7.95932	2.56869e-08	-1.09273	down
ENSMUSG00000023905	Tnfrsf12a	515	345	832	1065	7.74593	5.46294	11.6082	14.1628	1.11781e-05	1.23301	up
ENSMUSG00000038936	Sccpdh	113	101	213	326	0.874947	0.794215	1.49293	2.1776	0.000268054	1.42054	up
ENSMUSG00000021460	Auh	2757	2455	1269	1137	26.9134	25.2096	11.6192	9.79663	3.6556e-09	-1.02095	down
ENSMUSG00000020334	Slc22a4	217	316	99	52	1.4125	2.16515	0.600458	0.297002	0.000509355	-1.72299	down
ENSMUSG00000054226	Tprkb	11195	9543	3205	3500	85.8299	74.953	22.8169	23.22	1.35293e-26	-1.53678	down
ENSMUSG00000004038	Gstm3	7711	9895	284	253	86.992	117.169	2.97052	2.51543	1.49017e-142	-4.94337	down
ENSMUSG00000048271	Rbm33	7023	3490	1956	1951	11.2828	5.90131	3.17653	3.03556	1.38665e-05	-1.33124	down
ENSMUSG00000034006	Slc66a2	6342	7560	2669	2684	47.1186	59.3701	18.1801	17.4739	1.21888e-15	-1.28593	down
ENSMUSG00000074794	Arrdc3	10920	7618	1066	958	39.3235	28.8098	3.56368	3.06015	9.67788e-52	-3.09932	down
ENSMUSG00000034845	Plvap	1755	856	484	724	13.0617	6.68779	3.34464	4.75558	0.00766576	-1.02005	down
ENSMUSG00000046532	Ar	361	184	89	91	0.531134	0.28368	0.121018	0.118337	0.00132722	-1.50211	down
ENSMUSG00000029234	Tmem165	469	578	1108	1220	3.65049	4.71427	8.04513	8.4028	7.53622e-09	1.24257	up
ENSMUSG00000029238	Clock	1442	2006	4208	5748	2.43028	3.39852	6.18032	8.43724	4.84569e-12	1.61594	up
ENSMUSG00000035356	Nfkbiz	797	555	3044	2597	3.24671	2.37508	11.4895	9.29031	1.90169e-21	2.15733	up
ENSMUSG00000035357	Pdzrn3	176	164	2075	2053	0.633776	0.617348	6.94022	6.53552	1.03238e-91	3.69452	up
ENSMUSG00000034911	Ushbp1	585	365	196	160	3.26023	1.98605	0.989782	0.764265	0.000253064	-1.31855	down
ENSMUSG00000021453	Gadd45g	95	288	7194	6209	1.30103	4.17463	92.2513	75.7604	2.27935e-11	5.21641	up
ENSMUSG00000036892	Prodh2	12586	11271	3018	2286	115.066	107.305	26.6179	18.3122	5.53997e-28	-2.0729	down
Mus_musculus_newGene_947	Mus_musculus_newGene_947	330	325	937	760	1.26203	1.05752	2.97893	2.23148	8.62756e-10	1.46822	up
ENSMUSG00000047617	Paxx	1248	993	242	211	18.8006	15.7123	3.38065	2.80442	1.06704e-20	-2.21148	down
ENSMUSG00000027660	Skil	668	692	2174	3600	1.47271	1.61022	4.45968	7.16064	7.44907e-18	2.17174	up
ENSMUSG00000027669	Gnb4	220	163	66	89	0.541755	0.421735	0.149754	0.192027	0.00634461	-1.21421	down
ENSMUSG00000025348	Itga7	421	506	996	988	1.67183	2.02298	3.46095	3.27408	4.13481e-08	1.18894	up
ENSMUSG00000056071	S100a9	26	6	272	260	0.726693	0.168189	7.29378	6.62931	3.93897e-12	4.15375	up
ENSMUSG00000014905	Dnajb9	5802	6823	17968	18858	34.9131	43.1815	100.458	100.167	1.09015e-28	1.63495	up
ENSMUSG00000078452	Raet1d	954	901	312	275	9.90229	9.81152	3.00573	2.51351	9.79485e-13	-1.56612	down
ENSMUSG00000037139	Myom3	25	18	613	485	0.064934	0.050033	1.50791	1.13677	6.8423e-37	4.77052	up
ENSMUSG00000019768	Esr1	990	769	2223	2984	2.33219	1.88265	4.8309	6.28034	3.22741e-14	1.65588	up
ENSMUSG00000019762	Iyd	6416	5867	2902	2779	60.0974	57.6773	25.2391	23.0013	3.83647e-13	-1.01913	down
ENSMUSG00000021209	Ppp4r4	790	750	2514	2011	3.30383	3.00646	8.87822	7.06665	1.01294e-16	1.65026	up
ENSMUSG00000021208	Ifi27l2b	254	227	1191	1147	3.43121	3.21853	14.9611	13.712	7.60813e-32	2.37444	up
ENSMUSG00000029032	Arhgef16	507	547	195	165	2.80934	3.14515	1.0491	0.85845	1.26037e-07	-1.45638	down
Mus_musculus_newGene_3068	Mus_musculus_newGene_3068	468	222	141	82	1.20396	0.610436	0.417433	0.13049	0.00303868	-1.52651	down
ENSMUSG00000020553	Pctp	5749	4962	2174	2445	31.2277	28.2873	10.9624	11.7304	2.17525e-13	-1.12169	down
ENSMUSG00000028789	Azin2	105	118	15	8	0.751428	0.882592	0.098445	0.042562	1.77322e-06	-3.18129	down
ENSMUSG00000038213	Tapbpl	1320	1418	4271	4076	8.30013	9.35915	24.9399	22.6454	3.55529e-30	1.70046	up
ENSMUSG00000025003	Cyp2c39	113	155	301	291	0.914051	1.31632	2.27498	2.09191	0.000497861	1.23412	up
ENSMUSG00000025002	Cyp2c55	639	807	18	6	4.73738	6.27996	0.117819	0.032842	9.04801e-39	-5.81776	down
ENSMUSG00000025001	Hells	121	74	21	30	0.304344	0.194179	0.047328	0.066532	0.00477763	-1.84323	down
ENSMUSG00000025007	Aldh18a1	33	39	165	283	0.152069	0.164622	0.646679	1.04577	1.32429e-08	2.72244	up
ENSMUSG00000025004	Cyp2c40	2213	4495	312	292	18.1746	38.7341	2.36711	2.1076	1.64385e-25	-3.38491	down
Mus_musculus_newGene_2330	Mus_musculus_newGene_2330	25	40	92	109	0.136959	0.412909	0.65568	0.718382	0.00416272	1.71639	up
ENSMUSG00000032353	Tmed3	977	1360	3542	3746	10.7298	15.6788	36.1417	36.3632	1.33948e-16	1.73023	up
ENSMUSG00000032350	Gclc	20947	18452	7084	8271	90.518	83.6864	28.4239	31.5776	7.40553e-19	-1.26833	down
ENSMUSG00000018405	Mrm1	270	299	106	91	1.60952	1.871	0.586139	0.477082	4.33006e-05	-1.43718	down
ENSMUSG00000018401	Mtmr4	2833	3152	5694	6842	7.41327	8.70391	13.9054	16.6913	6.10122e-13	1.15586	up
ENSMUSG00000028957	Per3	3857	2913	64	77	9.64738	7.6385	0.14971	0.167535	1.87784e-122	-5.49282	down
ENSMUSG00000024663	Rab3il1	147	267	49	41	0.687108	0.804735	0.125005	0.100386	4.23219e-05	-2.11144	down
ENSMUSG00000024664	Fads3	1087	1391	196	215	4.35737	5.85502	0.729968	0.759922	4.38967e-26	-2.50242	down
ENSMUSG00000024665	Fads2	41077	38664	7672	8615	192.967	190.679	33.4812	35.7419	6.67398e-72	-2.20044	down
ENSMUSG00000032826	Ank2	93	107	309	285	0.095607	0.155895	0.590747	0.327454	7.4393e-07	1.66284	up
ENSMUSG00000047394	Odf3b	419	489	206	147	6.80136	8.14152	3.04392	2.05521	0.000127961	-1.26815	down
ENSMUSG00000022843	Clcn2	3293	3413	708	706	15.3498	16.6539	3.0404	2.87277	5.93398e-47	-2.15373	down
ENSMUSG00000022840	Adcy5	126	96	38	30	0.265459	0.211949	0.073456	0.054255	0.00467285	-1.61079	down
ENSMUSG00000022847	Thpo	687	838	1777	1572	5.83338	8.02654	15.5067	13.0052	4.18882e-09	1.22736	up
ENSMUSG00000022844	Pdia5	4412	4461	8771	8889	36.071	38.2818	66.5895	64.2196	2.63333e-18	1.08495	up
ENSMUSG00000073940	Hbb-bt	583	1354	340	236	12.2486	29.8904	6.64064	4.38542	0.000145752	-1.65847	down
ENSMUSG00000027313	Chac1	72	83	489	453	0.642129	0.782547	4.09976	3.60897	1.6256e-19	2.69589	up
ENSMUSG00000072115	Ang	11035	10027	28042	24499	153.241	145.005	373.852	317.463	1.47002e-21	1.41335	up
Mus_musculus_newGene_362	Mus_musculus_newGene_362	0	6	72	105	0	0.040864	0.47139	0.771441	1.55977e-06	4.96412	up
ENSMUSG00000028999	Rint1	1206	1662	2932	3186	5.77064	8.08221	12.5583	12.8302	2.91006e-08	1.18209	up
ENSMUSG00000078612	Fyb2	289	432	2005	1903	1.37442	2.16647	8.96893	8.09032	4.25148e-25	2.52878	up
ENSMUSG00000004951	Hspb1	553	637	293	206	9.04237	10.9272	4.42837	2.96111	0.000179169	-1.15863	down
ENSMUSG00000051238	Swsap1	264	336	793	740	2.11771	2.8318	5.92422	5.25885	8.21017e-09	1.44491	up
ENSMUSG00000051236	Msrb3	482	510	1121	1433	1.855	2.05954	4.00551	4.87269	5.50799e-12	1.45323	up
ENSMUSG00000056708	Ier5	313	245	941	792	1.41177	1.15983	3.94348	3.15732	6.97335e-12	1.73068	up
Mus_musculus_newGene_645	Mus_musculus_newGene_645	527	240	990	1157	3.57391	1.55018	6.12507	6.62418	1.99808e-05	1.58017	up
ENSMUSG00000018171	Vmp1	6380	6248	12283	12462	33.8617	34.8187	60.5679	58.484	9.0881e-19	1.06267	up
ENSMUSG00000033318	Gstt2	5635	4806	1703	1572	79.2101	70.2542	17.3224	17.6442	5.42617e-23	-1.57848	down
ENSMUSG00000038473	Nos1ap	54	59	1308	1158	0.302464	0.300879	6.32611	5.42005	2.4905e-73	4.54119	up
ENSMUSG00000030660	Pik3c2a	3951	3524	6260	8352	7.27341	6.92861	10.9468	13.8572	5.78999e-09	1.05638	up
ENSMUSG00000063704	Mapk15	704	835	72	46	5.48316	6.84339	0.50971	0.303758	3.21947e-29	-3.61032	down
ENSMUSG00000036492	Rnf39	469	478	175	252	4.72113	4.93733	1.58265	2.11723	0.00052021	-1.06112	down
ENSMUSG00000076441	Ass1	223733	260704	36917	49847	1951.32	2386.47	298.962	384.116	1.24784e-40	-2.39376	down
ENSMUSG00000038781	Stap2	2063	2241	4899	4306	20.2217	23.0549	44.5834	37.2934	4.54674e-13	1.19	up
ENSMUSG00000037363	Letm2	147	141	52	63	1.00886	1.03161	0.35707	0.403432	0.0081082	-1.234	down
ENSMUSG00000011179	Odc1	3268	3836	6378	8460	22.2503	27.4936	40.2091	50.5145	1.66792e-09	1.15019	up
ENSMUSG00000039438	Ttc36	18459	18580	6100	5310	307.472	324.832	94.3479	78.1466	3.91433e-28	-1.60487	down
ENSMUSG00000022674	Ube2v2	419	362	812	916	7.72196	6.46878	3.83389	4.40577	9.79267e-09	1.23734	up
ENSMUSG00000022679	Mpv17l	2331	2070	894	1019	12.1496	11.1425	4.1136	4.47733	7.03618e-11	-1.11057	down
Mus_musculus_newGene_3745	Mus_musculus_newGene_3745	14	40	454	650	0.026509	0.083033	0.842992	1.14979	2.93654e-21	4.43698	up
ENSMUSG00000012483	Rpa3	245	217	106	80	5.39369	5.0079	2.15644	1.54739	0.00225293	-1.21672	down
Mus_musculus_newGene_1261	Mus_musculus_newGene_1261	1111	1024	390	307	9.55272	8.82824	2.5669	2.16031	8.75619e-11	-1.51964	down
ENSMUSG00000025902	Sox17	128	113	25	17	0.767279	0.655776	0.101705	0.067067	3.02058e-05	-2.42431	down
ENSMUSG00000029591	Ung	364	363	712	765	2.61094	2.77644	4.90802	5.38776	1.73126e-07	1.114	up
ENSMUSG00000029596	Sdsl	670	911	4428	5503	6.79032	9.59326	41.5669	48.8781	6.714e-39	2.73864	up
ENSMUSG00000049922	Slc35c1	797	1017	2024	2224	3.79762	5.2309	9.7178	10.4029	5.06829e-11	1.3171	up
ENSMUSG00000004035	Gstm7	3959	3888	829	959	43.6649	45.0668	8.35944	9.22557	3.66125e-42	-2.04317	down
ENSMUSG00000033871	Ppargc1b	453	412	24	31	1.82891	1.74923	0.086507	0.107934	3.54769e-27	-3.88427	down
ENSMUSG00000028248	Pnisr	4978	4552	2566	1772	19.0475	17.7765	9.05461	5.80693	5.71306e-06	-1.03811	down
ENSMUSG00000028240	Cyp7a1	4299	4991	439	40	15.2414	18.5726	1.44379	0.12447	0.00747948	-4.1655	down
ENSMUSG00000028862	Map3k6	54	112	198	226	0.182412	0.397931	0.626794	0.681413	0.00442902	1.43927	up
ENSMUSG00000034613	Ppm1h	75	93	178	251	0.183858	0.224878	0.393006	0.513377	0.000581307	1.43946	up
ENSMUSG00000021594	Srd5a1	9936	10701	991	1036	55.5854	62.8299	5.14727	5.11698	1.75175e-128	-3.25666	down
ENSMUSG00000027296	Itpka	75	115	6	16	0.60833	0.980696	0.044876	0.114064	9.57038e-05	-3.02897	down
ENSMUSG00000027293	Ehd4	293	256	865	1040	1.16057	1.06432	3.18165	3.64137	2.23343e-17	1.88568	up
ENSMUSG00000005413	Hmox1	386	271	2360	2552	3.63328	2.68007	20.6523	21.2521	4.92522e-45	2.99565	up
ENSMUSG00000026749	Nek6	4271	4365	9147	9143	9.0208	11.3858	25.3882	25.0238	9.10662e-21	1.17468	up
ENSMUSG00000026272	Agxt	16638	16548	5783	6280	158.467	165.422	51.1436	52.8462	6.61103e-30	-1.36877	down
ENSMUSG00000003814	Calr	48462	48824	128999	124546	328.221	347.065	811.255	745.301	1.68741e-35	1.47454	up
ENSMUSG00000003813	Rad23a	2202	2002	522	559	16.8281	15.7735	3.61965	3.79097	4.03647e-29	-1.86737	down
ENSMUSG00000029924	Slc37a3	1215	1370	2398	2999	4.55532	5.5052	8.40204	10.1232	6.36529e-10	1.15066	up
Mus_musculus_newGene_1870	Mus_musculus_newGene_1870	216	273	90	89	1.48843	1.83625	0.583191	0.510993	0.000378031	-1.3591	down
ENSMUSG00000034422	Parp14	1797	1756	7025	5375	3.58255	3.67418	13.0088	9.47096	1.57168e-23	1.89892	up
Mus_musculus_newGene_1296	Mus_musculus_newGene_1296	0	0	277	284	0	0	1.51355	1.27955	7.55117e-12	10.6665	up
ENSMUSG00000017756	Slc12a7	7636	8973	3559	3312	23.439	28.9675	9.80173	8.53911	3.58914e-13	-1.18138	down
ENSMUSG00000017754	Pltp	1769	1988	693	932	13.795	16.9236	4.99576	6.67768	1.59992e-07	-1.12124	down
Mus_musculus_newGene_619	Mus_musculus_newGene_619	2	4	111	112	0.012255	0.025725	0.736879	0.622568	2.52494e-10	5.30678	up
Mus_musculus_newGene_2588	Mus_musculus_newGene_2588	624	509	285	196	2.17895	1.86681	0.924282	0.604777	0.000412027	-1.13831	down
Mus_musculus_newGene_2589	Mus_musculus_newGene_2589	2000	1611	539	401	4.36968	4.24166	1.52019	1.32286	1.40221e-14	-1.84464	down
Mus_musculus_newGene_878	Mus_musculus_newGene_878	33	55	147	216	0.261495	0.4567	1.08613	1.63758	3.00469e-05	2.12929	up
ENSMUSG00000040760	Appl1	946	1053	2141	2650	1.83088	2.13725	3.84725	4.53147	2.81524e-13	1.34995	up
ENSMUSG00000056148	Rdh9	8073	4634	2743	2977	44.8145	27.0252	14.3426	14.6708	6.65907e-05	-1.05668	down
ENSMUSG00000047230	Cldn2	3882	3639	9412	13314	18.8749	18.5939	42.4749	57.1864	3.29385e-19	1.68365	up
ENSMUSG00000047238	Mageh1	67	99	173	215	0.699662	1.08118	1.67559	1.99087	0.00302562	1.31227	up
ENSMUSG00000091474	2610021A01Rik	939	884	375	375	3.58493	3.46733	1.32245	1.31155	5.77409e-09	-1.18882	down
ENSMUSG00000097148	Gm3839	1590	1477	240	243	13.7307	13.3898	1.91818	1.84775	6.47447e-43	-2.57427	down
ENSMUSG00000031901	Dus2	325	355	957	1019	2.57851	2.96042	7.27102	7.36378	1.09962e-15	1.62991	up
ENSMUSG00000031904	Slc7a6	21	24	170	183	0.081099	0.09649	0.619106	0.634427	9.95298e-11	3.06246	up
ENSMUSG00000049353	Rd3	138	116	46	24	0.546555	0.479984	0.168403	0.081186	0.00326023	-1.75971	down
ENSMUSG00000049685	Cyp2g1	314	185	3	0	2.44276	1.50902	0.014488	0	3.4679e-13	-7.27917	down
Mus_musculus_newGene_6	Mus_musculus_newGene_6	79	96	362	324	0.338056	0.433571	1.45738	1.24453	6.19823e-10	2.06333	up
ENSMUSG00000030364	Clec2h	1883	1074	5	6	13.3019	8.0107	0.030861	0.035779	2.39757e-49	-7.9754	down
ENSMUSG00000026944	Abca2	3450	3983	1510	1435	6.3513	7.69719	2.58095	2.33401	1.00244e-13	-1.24384	down
ENSMUSG00000068877	Selenbp2	24948	31534	7043	3763	215.283	285.595	56.4047	28.7792	1.67944e-05	-2.28768	down
ENSMUSG00000031016	Wee1	1710	805	30	35	7.39557	3.65289	0.11824	0.130248	7.53537e-38	-5.17835	down
ENSMUSG00000029416	Slc15a4	1911	1453	583	779	10.6116	8.51407	2.96774	3.78193	3.16253e-07	-1.21389	down
ENSMUSG00000021629	Slc30a5	2704	3030	11052	10780	12.8028	14.7966	47.8321	44.3976	1.44609e-46	2.0206	up
ENSMUSG00000045045	Lrfn4	226	360	128	88	1.12249	1.88527	0.598351	0.393813	0.00254438	-1.34653	down
ENSMUSG00000042010	Acacb	6581	6510	2468	3469	11.2536	11.5953	3.89163	5.2265	4.65358e-08	-1.05269	down
ENSMUSG00000052560	Cpne8	143	131	2034	2290	0.869524	0.846843	14.3292	15.78	2.70641e-102	4.07129	up
ENSMUSG00000024978	Gpam	20563	16902	7064	9198	49.5254	42.6968	15.8647	20.8501	7.12327e-10	-1.11381	down
ENSMUSG00000043832	Clec4a3	30	30	95	83	0.334829	0.348081	1.00349	0.842732	0.0048356	1.66259	up
ENSMUSG00000051716	Apon	16230	18486	51291	49090	155.509	184.091	446.841	406.721	1.14447e-30	1.62369	up
ENSMUSG00000043831	Lysmd4	377	478	810	842	1.96698	2.59055	4.10767	4.50107	1.31775e-05	1.04049	up
ENSMUSG00000040564	Apoc1	51147	48083	20588	16950	1720.33	1697.81	634.51	494.468	3.48289e-16	-1.30736	down
ENSMUSG00000040562	Gstm2	4112	6318	1951	2137	57.1647	92.1893	25.1735	26.2387	1.23916e-07	-1.26307	down
ENSMUSG00000046070	Igfals	6598	6343	1652	1310	37.1766	37.51	8.63897	6.52003	3.51148e-30	-2.03206	down
Mus_musculus_newGene_474	Mus_musculus_newGene_474	166	207	37	41	1.83386	2.40144	0.373254	0.391886	1.72025e-06	-2.16788	down
Mus_musculus_newGene_473	Mus_musculus_newGene_473	154	163	58	48	0.995807	1.12634	0.289785	0.274059	0.00121231	-1.48676	down
ENSMUSG00000006641	Slc5a6	1572	1110	229	290	7.34367	5.39338	0.936658	1.27143	9.02574e-19	-2.27767	down
Mus_musculus_newGene_296	Mus_musculus_newGene_296	114	128	302	301	0.47554	0.560882	1.17804	1.11653	1.17802e-05	1.40873	up
Mus_musculus_newGene_295	Mus_musculus_newGene_295	3	0	493	1141	0.003217	0	1.05733	2.20319	4.89332e-11	9.17738	up
ENSMUSG00000115338	Pnp	3498	4330	13548	14595	17.5824	22.884	63.3415	64.8573	1.0047e-32	1.93591	up
ENSMUSG00000022025	Cnmd	365	237	8	0	3.954	2.6974	0.069746	0	0.00440232	-6.11658	down
Mus_musculus_newGene_3392	Mus_musculus_newGene_3392	5	32	117	207	0.022276	0.171049	0.555734	0.937541	0.000101906	3.20755	up
ENSMUSG00000040048	Ndufb10	5205	5458	2155	1871	105.652	116.155	40.6202	33.5164	3.59359e-16	-1.31161	down
ENSMUSG00000062624	Cyp2c67	28058	22824	6876	5851	239.625	204.58	54.5233	44.1452	7.84387e-29	-1.90365	down
ENSMUSG00000057666	Gapdh	2625	2062	1181	681	28.6018	26.2263	12.9749	7.27602	5.59805e-05	-1.23139	down
ENSMUSG00000039164	Naif1	213	167	348	369	0.676455	0.556572	1.02737	1.03528	0.000978053	1.0089	up
ENSMUSG00000039168	Dap	12749	13305	26729	26803	122.427	133.822	237.682	226.548	1.19152e-20	1.13078	up
ENSMUSG00000025089	Gfra1	9720	9286	15588	25379	32.0322	32.4354	48.4336	74.973	1.77147e-07	1.19446	up
ENSMUSG00000021701	Plk2	717	581	123	135	3.78406	3.22034	0.600524	0.629322	5.68684e-17	-2.2383	down
ENSMUSG00000021704	Mtx3	1645	1559	732	718	3.88359	3.8677	1.61549	1.51451	8.00166e-10	-1.05109	down
ENSMUSG00000021707	Dhfr	3250	2968	1196	960	8.99021	8.61589	3.07205	2.34512	5.85779e-14	-1.43269	down
ENSMUSG00000030972	Acsm5	14312	11465	3002	1991	75.3855	64.8263	14.798	9.23724	4.54417e-22	-2.26936	down
ENSMUSG00000033777	Tlr13	36	22	97	138	0.12844	0.081603	0.327359	0.443844	0.00032693	2.10916	up
ENSMUSG00000037470	Uggt1	5745	5772	15774	20090	9.5011	9.99311	24.4729	34.917	7.56815e-29	1.72791	up
ENSMUSG00000027931	Npr1	520	374	142	119	1.96209	1.48012	0.478941	0.387895	4.06844e-07	-1.68008	down
ENSMUSG00000027933	Ints3	1480	1828	3016	3557	5.11647	6.6837	9.71804	10.9212	1.31722e-08	1.07937	up
ENSMUSG00000071551	Akr1c19	8891	6000	864	825	67.1426	54.7531	4.65178	3.63991	6.21523e-47	-3.04483	down
ENSMUSG00000026043	Col3a1	991	806	297	168	2.63315	2.24664	0.731769	0.394195	4.99828e-08	-1.85032	down
ENSMUSG00000022340	Sybu	17	5	579	474	0.0777	0.024033	2.61611	2.04653	1.0047e-32	5.67846	up
ENSMUSG00000022346	Myc	70	130	312	319	0.501786	1.06871	2.11553	2.05502	3.31453e-05	1.74601	up
Mus_musculus_newGene_1424	Mus_musculus_newGene_1424	20215	14970	5667	7925	78.8363	61.3361	20.6597	27.4962	3.144e-09	-1.28216	down
ENSMUSG00000032411	Tfdp2	1378	1250	463	496	4.23846	3.4699	2.33017	1.91333	2.21469e-13	-1.36234	down
ENSMUSG00000032417	Rwdd2a	127	66	10	7	1.37658	0.915432	0.097377	0.061859	1.00435e-05	-3.40613	down
ENSMUSG00000032418	Me1	24110	20603	8978	9961	108.464	97.2794	37.5029	39.5916	4.65875e-16	-1.14737	down
ENSMUSG00000024589	Nedd4l	1614	2563	4771	4916	5.73424	10.6598	17.6446	18.1731	1.1818e-07	1.30237	up
ENSMUSG00000000154	Slc22a18	6197	6343	2301	1797	60.1106	64.7998	20.9407	15.4333	1.95076e-16	-1.51849	down
ENSMUSG00000024587	Nars	8299	8356	18599	20713	45.1192	47.6936	99.6137	99.6717	4.76352e-27	1.32982	up
ENSMUSG00000027580	Helz2	5601	6346	12561	10920	8.19337	9.74555	17.0654	14.1173	8.76447e-11	1.06797	up
ENSMUSG00000057465	Saa2	141	1444	741789	719705	3.18655	34.3691	16058.5	14813.6	9.54668e-16	9.93017	up
Mus_musculus_newGene_2443	Mus_musculus_newGene_2443	76	64	759	991	0.332107	0.295431	3.10156	3.8547	4.21344e-42	3.73362	up
Mus_musculus_newGene_1988	Mus_musculus_newGene_1988	73	74	6	12	0.957632	1.01138	0.071345	0.139128	0.000185779	-2.94313	down
ENSMUSG00000110949	Nudt8	170	198	589	455	3.19238	3.89121	10.2663	7.54277	9.77622e-08	1.59873	up
ENSMUSG00000015755	Tab2	4495	3749	8255	9797	15.245	13.308	26.1843	29.6779	3.68475e-14	1.22201	up
ENSMUSG00000023232	Serinc2	422	456	989	983	3.31926	3.76849	7.25087	6.8605	2.82828e-10	1.25917	up
ENSMUSG00000067071	Hes6	4770	4909	911	810	52.8462	57.0794	9.36683	7.92716	2.78587e-53	-2.3983	down
ENSMUSG00000073002	Vamp5	404	348	146	95	5.7452	4.49453	1.65786	1.03701	2.79312e-05	-1.54398	down
ENSMUSG00000031530	Dusp4	190	139	28	45	1.02568	0.784907	0.138017	0.212767	5.82541e-05	-2.08259	down
ENSMUSG00000093485	Gm20708	1851	2239	115	118	15.3774	19.5276	0.880429	0.861752	1.20861e-77	-4.04312	down
ENSMUSG00000056476	Med12l	92	95	338	590	0.139104	0.139819	0.421309	0.785538	1.23e-10	2.39648	up
ENSMUSG00000038155	Gstp2	12261	15668	5303	4508	228.499	305.92	98.6625	81.7543	1.74717e-13	-1.41672	down
ENSMUSG00000029661	Col1a2	467	413	138	179	1.29161	1.19685	0.354192	0.449266	3.51487e-06	-1.38285	down
ENSMUSG00000028133	Rwdd3	273	210	82	68	3.18879	2.61216	0.863402	0.822221	7.01698e-05	-1.59135	down
Mus_musculus_newGene_2473	Mus_musculus_newGene_2473	396	304	118	89	3.07501	2.69065	0.930585	0.635011	4.48685e-06	-1.66093	down
Mus_musculus_newGene_2474	Mus_musculus_newGene_2474	284	441	104	89	0.795915	1.29984	0.268806	0.218765	2.96899e-06	-1.81839	down
ENSMUSG00000039286	Fndc3b	1263	1620	14415	17975	2.82687	3.73478	29.4257	35.1304	8.63778e-83	3.57772	up
ENSMUSG00000018727	Cpsf4l	238	281	104	59	2.67373	3.35321	1.15358	0.590135	0.000509355	-1.57378	down
ENSMUSG00000053158	Fes	497	634	269	175	2.13695	2.88768	1.17571	0.730752	0.000298826	-1.25351	down
ENSMUSG00000060548	Tnfrsf19	603	410	46	46	2.24196	1.59686	0.153205	0.167816	2.55135e-21	-3.3663	down
ENSMUSG00000024743	Syt7	76	218	11	12	0.167741	0.510839	0.02267	0.022217	1.60887e-06	-3.59115	down
ENSMUSG00000022965	Ifngr2	633	910	1547	1669	2.52487	3.80857	5.72782	5.88021	2.13275e-06	1.14847	up
ENSMUSG00000045551	Fpr1	38	60	119	144	0.419403	0.69222	1.22487	1.41407	0.00432875	1.51164	up
ENSMUSG00000029309	Sparcl1	348	161	44	44	1.87359	0.902847	0.214527	0.206186	2.82386e-06	-2.43513	down
ENSMUSG00000043439	Epop	286	235	53	94	1.82506	1.57251	0.309559	0.530532	6.98942e-05	-1.73799	down
ENSMUSG00000008090	Fgfrl1	2613	2087	852	834	16.7012	13.9405	5.04232	4.7268	1.26326e-13	-1.38515	down
ENSMUSG00000058325	Dock1	824	617	1351	1614	1.85366	1.44252	2.89669	3.28844	3.79809e-07	1.13282	up
ENSMUSG00000032202	Rab27a	83	66	203	220	0.385394	0.321648	0.911019	0.959365	4.14614e-05	1.59785	up
ENSMUSG00000032207	Lipc	11232	10672	1290	945	89.8576	89.0739	9.67142	6.70267	2.12128e-61	-3.1966	down
ENSMUSG00000024127	Prepl	1664	1751	3056	4132	7.9981	8.91682	13.3804	17.1449	1.4499e-09	1.16184	up
ENSMUSG00000074240	Cib3	364	272	22	39	9.15122	7.14524	0.501685	0.859228	7.01624e-14	-3.29296	down
ENSMUSG00000061947	Serpina10	9638	9869	64495	65098	40.752	43.7999	253.236	243.219	5.55843e-134	2.82385	up
ENSMUSG00000044562	Rasip1	318	205	123	80	1.46508	0.990186	0.526009	0.323896	0.00569613	-1.26562	down
Mus_musculus_newGene_2274	Mus_musculus_newGene_2274	146	118	3	11	1.39225	1.13642	0.021502	0.080138	1.39028e-08	-4.1512	down
ENSMUSG00000052776	Oas1a	124	160	331	241	0.965491	1.31094	2.40558	1.67091	0.00438796	1.10453	up
Mus_musculus_newGene_765	Mus_musculus_newGene_765	400	351	145	193	0.899649	0.829067	0.300661	0.37266	0.000857243	-1.06191	down
ENSMUSG00000061175	Fnip2	5298	4121	672	861	10.7459	8.78363	1.26297	1.5401	1.58725e-37	-2.52826	down
ENSMUSG00000055866	Per2	4141	3663	710	864	10.5004	9.74845	1.67019	1.93398	7.65528e-40	-2.21904	down
ENSMUSG00000055862	Izumo4	296	370	116	92	3.66022	5.50365	1.32445	1.04258	9.84682e-06	-1.58579	down
ENSMUSG00000030051	Aplf	268	203	104	103	1.83811	1.53374	0.573638	0.613412	0.00455094	-1.09211	down
ENSMUSG00000030058	Copg1	5381	6147	13252	13894	19.3052	23.0879	44.1114	43.9146	9.3826e-21	1.32632	up
ENSMUSG00000109350	Gm44805	6075	4236	695	1050	117.454	87.2373	12.828	18.1828	4.26713e-23	-2.47324	down
ENSMUSG00000021338	Carmil1	2404	2082	824	684	7.1557	6.52219	2.29719	1.79166	6.3062e-14	-1.47749	down
ENSMUSG00000021336	Slc17a4	3463	3935	633	524	16.6047	18.5998	2.74603	2.27026	8.99087e-43	-2.58329	down
ENSMUSG00000025823	Pdia4	12250	12768	51223	53660	75.5315	82.6232	293.261	292.327	2.21379e-76	2.15908	up
ENSMUSG00000025792	Slc25a10	11434	12190	4787	4166	83.6027	93.5429	32.4978	26.9097	2.25944e-17	-1.30633	down
ENSMUSG00000029499	Pxmp2	6590	6185	2624	3077	93.6396	92.329	34.6187	38.6631	1.43052e-13	-1.07336	down
ENSMUSG00000042099	Kank3	325	214	89	52	2.35826	1.63956	0.504292	0.328925	0.000103922	-1.83408	down
ENSMUSG00000027475	Kif3b	433	575	1009	1614	1.13588	1.58324	2.45755	3.74253	6.5212e-07	1.46437	up
ENSMUSG00000052435	Cebpe	373	355	133	70	4.44563	4.4321	1.47184	0.731927	3.61221e-05	-1.74313	down
ENSMUSG00000021495	Fam193b	3815	4531	1957	1434	13.0982	16.4593	6.32801	4.40065	8.10043e-08	-1.20454	down
ENSMUSG00000021496	Pcbd2	365	403	165	148	9.9123	11.4756	4.16097	3.51948	6.84591e-05	-1.20227	down
ENSMUSG00000021493	Pdlim7	348	488	174	182	3.30082	4.81594	1.46115	1.45614	0.000557144	-1.14212	down
ENSMUSG00000024462	Gabbr1	204	186	53	54	0.694034	0.601805	0.202643	0.214757	1.76084e-05	-1.77336	down
ENSMUSG00000100586	Vmn1r90	227	279	7	3	0.430122	0.554956	0.010723	0.004057	1.61617e-18	-5.56764	down
ENSMUSG00000033066	Gas7	364	269	60	65	0.760058	0.589674	0.115432	0.119493	1.28206e-09	-2.24701	down
ENSMUSG00000033065	Pfkm	1046	1064	373	313	5.47375	5.79421	1.81552	1.43023	3.61217e-12	-1.527	down
ENSMUSG00000004085	Map3k20	882	759	380	282	2.81938	2.59651	1.21175	0.750594	7.06389e-06	-1.21313	down
ENSMUSG00000005681	Apoa2	176432	177285	63728	56284	5172.71	5454.93	1734.61	1458.9	2.98575e-26	-1.46568	down
ENSMUSG00000004558	Ndrg2	92246	76896	30058	30794	661.895	578.279	197.974	193.416	5.08151e-23	-1.38172	down
Mus_musculus_newGene_218	Mus_musculus_newGene_218	161	226	40	34	0.661455	0.983445	0.186372	0.110762	1.40167e-06	-2.29525	down
ENSMUSG00000017843	Ppp2r5c	3173	2982	5734	6311	16.9164	16.9104	32.8625	33.1904	2.48736e-15	1.06002	up
ENSMUSG00000041930	Fam222a	125	162	712	709	0.626041	0.854359	3.33507	3.15916	6.15366e-20	2.39865	up
ENSMUSG00000032267	Usp28	948	663	281	324	3.64908	2.57506	0.933565	1.07397	1.54209e-06	-1.32009	down
ENSMUSG00000017830	Dhx58	491	520	1559	737	3.00731	3.34408	8.87336	3.99158	0.00071621	1.28408	up
Mus_musculus_newGene_3315	Mus_musculus_newGene_3315	3017	2995	806	700	8.3285	9.31718	2.19438	1.79233	2.6132e-29	-1.9033	down
ENSMUSG00000038871	Bpgm	442	598	1178	1172	2.94249	4.17971	7.28492	6.89567	9.04213e-08	1.26645	up
ENSMUSG00000052632	Asap2	238	299	861	955	0.61948	1.05189	2.5877	2.76882	4.88361e-15	1.84739	up
ENSMUSG00000013033	Adgrl1	424	405	85	116	0.781878	0.81982	0.141799	0.183939	6.86662e-10	-1.95486	down
ENSMUSG00000033207	Mamdc2	127	70	23	33	0.547137	0.313928	0.091593	0.125156	0.00999345	-1.72252	down
ENSMUSG00000053581	Zfand2a	425	516	938	1012	1.99225	2.54815	4.10282	4.20556	2.04905e-07	1.1413	up
ENSMUSG00000054580	Pla2r1	154	109	26	38	0.318315	0.237083	0.04913	0.069132	0.000466208	-1.9483	down
ENSMUSG00000019139	Isyna1	453	496	5284	3809	3.62718	4.18795	39.5653	27.1776	2.03438e-53	3.35599	up
ENSMUSG00000055980	Irs1	2942	2023	500	836	4.75778	3.43312	0.75006	1.19392	5.9188e-10	-1.80532	down
ENSMUSG00000030790	Adm	60	27	146	201	0.628214	0.300152	1.44216	1.88926	0.000189296	2.08853	up
ENSMUSG00000024018	Ccdc167	504	630	1321	1542	1.18938	1.88171	2.94096	3.07896	3.23795e-11	1.42503	up
ENSMUSG00000036565	Ttyh3	450	370	167	184	1.43145	1.24466	0.495497	0.523745	0.0001252	-1.13181	down
ENSMUSG00000038092	Hsd3b5	18540	15589	30	28	177.036	156.234	0.259032	0.228876	0	-9.10748	down
ENSMUSG00000030245	Golt1b	284	324	823	855	1.48661	1.78403	4.0075	3.9637	1.28366e-12	1.55558	up
ENSMUSG00000030244	Gys2	30442	21671	3857	3795	169.547	126.707	19.9774	18.6653	3.22358e-47	-2.67304	down
ENSMUSG00000031429	Psmd10	550	571	1317	1226	5.69151	6.2067	12.6801	11.2338	1.27931e-11	1.27457	up
ENSMUSG00000043789	Vwce	3461	3584	1701	1341	11.2666	12.2457	5.14114	3.85778	7.32228e-09	-1.11675	down
ENSMUSG00000031119	Gpc4	4131	3533	7585	7354	23.0461	20.6894	39.2975	36.251	8.66507e-13	1.05654	up
ENSMUSG00000039323	Igfbp2	50439	40555	5880	3655	571.169	481.988	61.7864	36.5542	3.78355e-38	-3.15492	down
ENSMUSG00000029752	Asns	88	111	773	1155	0.645888	0.855886	5.30404	7.54238	8.8743e-30	3.36238	up
ENSMUSG00000021102	Glrx5	4948	5288	2386	2110	25.5989	29.3934	11.4699	10.0469	8.38109e-12	-1.0937	down
ENSMUSG00000032492	Pth1r	410	292	103	152	2.75956	2.03831	0.631735	0.881917	0.000301806	-1.37089	down
ENSMUSG00000042115	Klhdc8a	36	58	385	423	0.123722	0.210614	1.23647	1.29465	3.90783e-18	3.19249	up
ENSMUSG00000024053	Emilin2	40	31	134	155	0.148983	0.146561	0.464895	0.513618	1.41497e-05	2.11697	up
ENSMUSG00000024052	Lpin2	28068	18384	6627	10783	76.3388	52.2761	16.9543	26.8711	1.17055e-06	-1.32682	down
ENSMUSG00000027506	Tpd52	955	1100	2885	2772	2.40205	2.73689	11.8999	11.3896	4.46443e-20	1.5527	up
ENSMUSG00000038217	Tlcd2	3908	4491	756	635	50.7091	61.1951	9.11384	7.22727	7.07575e-42	-2.50085	down
ENSMUSG00000026365	Cfh	76261	66094	275424	326543	269.512	246.883	896.245	1011.35	2.3386e-52	2.17122	up
ENSMUSG00000098188	Sowahc	355	384	1052	1247	1.16998	1.32888	3.22255	3.63509	3.67939e-17	1.72705	up
Mus_musculus_newGene_531	Mus_musculus_newGene_531	850	1436	38278	54703	1.54852	2.74642	64.8009	90.5375	1.98008e-94	5.43036	up
Mus_musculus_newGene_1903	Mus_musculus_newGene_1903	0	0	104	111	0	0	0.644158	0.739186	1.57528e-08	9.28232	up
Mus_musculus_newGene_1904	Mus_musculus_newGene_1904	11	10	162	133	0.103599	0.098219	1.76706	1.40193	1.81667e-11	3.90715	up
ENSMUSG00000045441	Gprin3	2588	1698	584	801	4.59031	3.16074	0.960974	1.25384	8.75908e-09	-1.53856	down
Mus_musculus_newGene_392	Mus_musculus_newGene_392	256	182	506	559	1.39512	1.10771	2.24836	2.56866	2.01261e-06	1.37487	up
ENSMUSG00000019338	Zfp687	759	894	1598	1562	2.55779	3.13435	5.04653	4.74048	7.78244e-08	1.02628	up
ENSMUSG00000054517	Trim65	840	760	266	419	3.3591	3.17386	1.00251	1.49701	9.05761e-05	-1.13627	down
ENSMUSG00000056966	Gjc3	56	84	360	340	0.204116	0.323434	1.23424	1.10716	3.79586e-11	2.4127	up
ENSMUSG00000022108	Itm2b	63027	57415	25760	23799	530.459	505.877	201.118	179.043	7.45454e-19	-1.18728	down
Mus_musculus_newGene_3297	Mus_musculus_newGene_3297	130	118	29	38	0.649672	0.61656	0.131543	0.166096	0.000670836	-1.79798	down
Mus_musculus_newGene_3293	Mus_musculus_newGene_3293	112	114	189	242	0.381672	0.402498	0.592932	0.729223	0.0070924	1.0206	up
Mus_musculus_newGene_3290	Mus_musculus_newGene_3290	315	243	48	20	0.967877	0.782667	0.135471	0.052136	1.69021e-08	-2.93479	down
Mus_musculus_newGene_1785	Mus_musculus_newGene_1785	35	46	148	105	0.095851	0.13549	0.385281	0.260375	0.00142154	1.73784	up
Mus_musculus_newGene_2746	Mus_musculus_newGene_2746	173	97	8	12	2.73255	1.60748	0.104997	0.156254	5.12369e-08	-3.66217	down
Mus_musculus_newGene_2744	Mus_musculus_newGene_2744	116	68	11	9	1.11879	0.673498	0.089858	0.072772	2.46435e-05	-3.10464	down
ENSMUSG00000014504	Srp19	1021	1045	1994	1956	17.7593	19.0205	31.2299	29.9611	1.36877e-10	1.02729	up
ENSMUSG00000017978	Cadps2	1172	854	1984	2541	3.89331	2.96246	6.12827	7.46434	3.67372e-08	1.25047	up
ENSMUSG00000030494	Rhpn2	1095	1030	394	364	4.61662	4.55668	1.54245	1.35378	5.94307e-12	-1.39379	down
ENSMUSG00000037443	Cep85	2518	3192	5407	5581	9.95032	12.9823	19.4499	19.0542	8.39492e-09	1.0346	up
ENSMUSG00000054422	Fabp1	114252	110861	14195	11052	3056.07	3112.35	352.559	261.178	2.19287e-72	-3.06092	down
ENSMUSG00000027907	S100a11	138	131	1484	1394	3.97539	3.95936	39.8752	35.6353	1.15445e-65	3.51261	up
ENSMUSG00000020869	Lrrc59	4268	5193	19973	20240	22.2487	28.4126	96.6931	93.2379	1.11425e-44	2.17833	up
ENSMUSG00000062328	Rpl17	2115	2126	5227	4195	23.5915	24.881	54.1394	41.3436	6.778e-12	1.24653	up
ENSMUSG00000030161	Gabarapl1	23373	20100	7477	7555	190.038	171.45	56.4317	54.4214	2.2698e-26	-1.43899	down
ENSMUSG00000003279	Dlgap1	201	179	48	56	0.554693	0.503058	0.120166	0.11519	2.64974e-05	-1.77807	down
ENSMUSG00000038754	Elovl3	2614	7397	581	839	20.6289	61.1664	4.23715	5.82194	0.000685509	-2.73651	down
ENSMUSG00000042834	Nrep	1240	911	86	97	8.19596	4.45114	0.511163	0.515572	2.47562e-38	-3.46208	down
ENSMUSG00000026839	Upp2	59797	48049	783	604	385.286	324.049	4.58813	3.37205	1.45934e-234	-6.1842	down
ENSMUSG00000026837	Col5a1	341	221	67	85	0.788867	0.4227	0.152182	0.200747	1.41497e-05	-1.79409	down
ENSMUSG00000029385	Ccng2	737	636	1134	1515	3.91436	3.51869	5.54234	7.05109	3.69152e-06	1.03773	up
ENSMUSG00000029380	Cxcl1	345	285	20042	13931	5.34201	4.63712	288.845	191.036	1.05463e-153	5.85079	up
ENSMUSG00000046338	Gpat2	100	108	10	16	0.56239	0.636601	0.047316	0.076686	6.93723e-06	-2.91214	down
ENSMUSG00000045680	Tcf21	219	138	15	36	2.5179	1.64244	0.149257	0.345477	6.73989e-06	-2.72032	down
ENSMUSG00000028476	Reck	635	457	92	146	2.11852	1.59816	0.282402	0.427509	1.74328e-09	-2.10855	down
ENSMUSG00000048424	Ranbp3l	149	129	8	5	0.518534	0.472825	0.02405	0.013183	8.79152e-11	-4.32313	down
ENSMUSG00000035486	Plk5	92	123	10	16	0.640727	0.899148	0.063081	0.098639	6.88455e-06	-2.9613	down
ENSMUSG00000012042	4930579F01Rik	868	616	168	158	7.09493	5.28448	1.26832	1.13756	1.59806e-13	-2.09153	down
ENSMUSG00000031723	Txnl4b	836	758	183	250	6.54227	6.22024	1.3293	1.72779	2.55203e-12	-1.79076	down
ENSMUSG00000031722	Hp	103534	122203	1711548	1539778	1138.63	1410.56	17478	14962	4.28248e-144	3.94073	up
ENSMUSG00000033880	Lgals3bp	2226	2449	8595	6329	14.1921	21.3964	55.3802	36.1244	4.36317e-18	1.76998	up
ENSMUSG00000046814	Gchfr	3957	3728	1413	1566	90.7409	89.7323	30.0859	31.7161	7.52843e-19	-1.27586	down
ENSMUSG00000026442	Nfasc	15	14	115	136	0.021821	0.029081	0.187055	0.263759	1.90508e-08	3.2041	up
ENSMUSG00000089704	Galnt2	1680	1730	3516	4468	6.03976	6.52966	11.7391	14.1948	1.59611e-14	1.31638	up
ENSMUSG00000045896	Paip2b	1316	1127	2430	3001	4.88706	4.39072	8.3784	9.84849	9.98208e-12	1.24316	up
ENSMUSG00000001604	Tcea3	4842	5161	600	258	57.4874	64.4757	6.57912	2.71482	5.17714e-08	-3.44161	down
ENSMUSG00000015143	Actn1	2623	1966	907	936	10.6668	8.46503	3.42679	3.37908	1.66043e-09	-1.22241	down
ENSMUSG00000062209	Erbb4	734	468	111	57	0.901419	0.602389	0.126231	0.060969	8.1875e-11	-2.73684	down
ENSMUSG00000031367	Ap1s2	126	99	221	260	0.699139	0.603053	1.18324	1.35409	0.00125191	1.18779	up
ENSMUSG00000020467	Efemp1	318	253	86	110	2.33168	1.92262	0.575107	0.702662	7.10808e-05	-1.45162	down
ENSMUSG00000028671	Gale	648	1010	3798	3619	6.85871	11.2237	36.9024	33.5831	1.0749e-20	2.25136	up
ENSMUSG00000025175	Fn3k	802	933	111	92	8.66015	9.7059	0.956921	0.819274	5.06328e-30	-3.00256	down
ENSMUSG00000025172	Ankrd2	10	15	190	216	0.12253	0.204546	2.28508	2.5111	1.38641e-15	4.11087	up
ENSMUSG00000060227	Golm2	277	205	530	585	0.977921	0.760461	1.75039	1.84818	2.36311e-06	1.30274	up
ENSMUSG00000053746	Ptrh1	24	30	120	129	0.362983	0.488897	1.72864	1.76648	1.37488e-05	2.29539	up
Mus_musculus_newGene_59	Mus_musculus_newGene_59	397	369	196	118	3.01924	3.4438	1.33139	0.982528	0.00191901	-1.18832	down
ENSMUSG00000006538	Ihh	624	464	24	22	3.73555	2.913	0.13208	0.115478	3.10561e-33	-4.46946	down
ENSMUSG00000030555	Ttc23	3010	2668	1228	1216	19.9712	18.815	7.54832	7.19004	9.67599e-13	-1.12305	down
ENSMUSG00000030551	Nr2f2	2550	2080	646	699	10.1719	9.00627	2.2625	2.37249	2.04472e-20	-1.6908	down
ENSMUSG00000073481	Mtarc2	24753	23626	10802	9703	194.151	193.221	77.7426	66.7738	1.34133e-16	-1.14455	down
ENSMUSG00000031608	Galnt7	309	243	516	520	1.05904	0.891261	1.64434	1.58004	0.00017625	1.00182	up
ENSMUSG00000029269	Sult1b1	2518	2064	842	1041	14.4498	12.5919	4.63113	5.61246	1.42886e-09	-1.19196	down
ENSMUSG00000029260	Ugt2b34	45451	33428	15396	14676	215.603	167.094	68.2645	61.8658	7.05381e-13	-1.29634	down
ENSMUSG00000035385	Ccl2	14	18	435	406	0.254477	0.341311	7.33771	6.51079	3.2323e-33	4.80837	up
ENSMUSG00000034926	Dhcr24	32227	31182	58381	70677	118.345	120.182	199.069	229.319	1.23402e-15	1.11527	up
Mus_musculus_newGene_1551	Mus_musculus_newGene_1551	8	8	719	583	0.019672	0.023175	2.11443	1.66133	6.14757e-44	6.44134	up
ENSMUSG00000006095	Tbcb	876	1075	1974	1775	9.15023	11.7781	19.141	16.3809	4.10165e-07	1.03448	up
ENSMUSG00000032561	Acpp	603	471	3771	3627	1.99073	1.6356	11.9145	10.8919	5.34942e-58	2.87832	up
Mus_musculus_newGene_935	Mus_musculus_newGene_935	434	440	197	154	1.62396	1.9552	0.483483	0.401581	5.66939e-05	-1.22144	down
Mus_musculus_newGene_486	Mus_musculus_newGene_486	5393	3698	1501	1844	6.12397	4.41406	1.59388	1.85118	1.65299e-09	-1.35025	down
Mus_musculus_newGene_487	Mus_musculus_newGene_487	197	254	66	88	0.683221	0.834959	0.165923	0.266092	0.000456042	-1.46266	down
ENSMUSG00000050854	Tmem125	285	329	665	765	2.62516	3.25028	5.76207	6.32983	3.29906e-08	1.30938	up
ENSMUSG00000050856	Atp5k	229	248	107	90	9.10336	10.3769	3.95547	3.16178	0.00162491	-1.18234	down
ENSMUSG00000036655	Colec11	878	488	103	257	9.52035	5.52818	1.04587	2.41758	0.000131432	-1.83812	down
ENSMUSG00000038545	Cul7	492	430	893	1176	1.3137	1.20747	2.21876	2.80826	5.65381e-08	1.2558	up
ENSMUSG00000010663	Fads1	41393	40287	11020	13911	177.28	181.026	43.9029	52.6736	1.77321e-27	-1.62258	down
ENSMUSG00000014177	Tvp23b	1231	1180	2089	2553	10.2038	10.2669	16.0754	18.6998	2.4388e-09	1.03513	up
ENSMUSG00000030714	Sgf29	991	892	412	398	11.3403	11.0834	4.36621	3.9997	5.99297e-08	-1.12383	down
ENSMUSG00000030711	Sult1a1	22711	23032	6874	8733	255.364	272.276	71.9976	86.7321	2.27316e-21	-1.46224	down
ENSMUSG00000048126	Col6a3	387	306	100	70	0.631119	0.523549	0.149536	0.100788	2.65064e-07	-1.93002	down
ENSMUSG00000039633	Lonrf1	669	333	141	143	2.51723	1.31114	0.490424	0.473535	2.35312e-05	-1.72247	down
ENSMUSG00000055013	Agap1	541	544	1782	1469	0.671074	0.748067	2.2922	1.97037	1.28003e-16	1.67771	up
ENSMUSG00000031441	Atp11a	663	510	7092	7598	1.72313	1.26467	16.9336	16.388	2.23456e-108	3.73948	up
ENSMUSG00000019718	L3hypdh	1338	1304	512	546	10.808	11.0537	3.83421	3.89671	7.55117e-12	-1.22868	down
ENSMUSG00000029122	Evc	139	100	23	38	0.533264	0.42852	0.085809	0.140817	0.00146901	-1.88082	down
ENSMUSG00000021186	Fbln5	244	170	58	37	0.616826	0.451593	0.135377	0.082705	3.3814e-05	-2.0247	down
ENSMUSG00000021188	Trip11	2448	2255	4740	5974	3.67044	3.54673	6.6038	7.93038	1.22371e-14	1.27771	up
Mus_musculus_newGene_3058	Mus_musculus_newGene_3058	67	73	261	275	0.760173	0.838128	2.7218	2.713	7.99038e-09	2.02795	up
ENSMUSG00000028001	Fga	227215	227436	1823170	2096470	1604.77	1683.11	11887.2	13000.3	1.78293e-150	3.19832	up
ENSMUSG00000072949	Acot1	1075	1115	152	167	7.00684	7.63393	0.917968	0.960359	1.69369e-36	-2.68832	down
ENSMUSG00000072941	Sod3	974	634	190	335	3.85126	2.63066	0.695317	1.16897	2.58434e-05	-1.52642	down
ENSMUSG00000072944	Nup62cl	83	66	8	8	0.63153	0.507704	0.053398	0.051291	4.87086e-05	-3.12569	down
ENSMUSG00000039196	Orm1	28708	33189	493752	483667	547.918	664.842	8750.47	8156.42	3.74344e-190	4.07252	up
ENSMUSG00000037905	Bri3bp	2012	2172	845	890	4.75476	5.27257	1.84287	1.80561	9.24212e-13	-1.17888	down
ENSMUSG00000037904	Ankrd9	302	281	44	55	2.29656	2.21879	0.257299	0.359941	2.42264e-11	-2.46744	down
ENSMUSG00000037907	Ankrd13b	241	230	79	73	1.22511	1.22457	0.353674	0.31983	3.61205e-05	-1.53845	down
ENSMUSG00000033102	Cdc14b	3260	2551	1202	1435	8.55635	7.17797	3.06646	4.58985	8.49342e-08	-1.04821	down
ENSMUSG00000059022	Kcp	675	653	158	100	2.1929	2.4445	0.461566	0.307321	1.11393e-12	-2.26669	down
ENSMUSG00000047843	Bri3	1642	1446	488	302	25.6354	23.7215	6.99698	4.13223	4.2478e-11	-1.86818	down
ENSMUSG00000074647	Fam83c	11	19	98	93	0.038085	0.071841	0.336903	0.30436	2.599e-05	2.7609	up
Mus_musculus_newGene_310	Mus_musculus_newGene_310	17	36	257	97	0.142511	0.316598	2.03414	0.725255	5.02115e-05	2.83893	up
ENSMUSG00000046711	Hmga1	1371	1295	624	587	11.8423	11.5466	4.81111	4.59955	1.54614e-08	-1.04526	down
Mus_musculus_newGene_1321	Mus_musculus_newGene_1321	446	426	23	17	1.42908	1.7115	0.071126	0.040324	9.58773e-30	-4.35227	down
Mus_musculus_newGene_1320	Mus_musculus_newGene_1320	19	16	122	79	0.146669	0.131369	0.966299	0.594444	4.68992e-05	2.61986	up
ENSMUSG00000035172	Plekhh3	530	747	198	230	2.80346	4.09503	0.9036	1.00538	6.59302e-07	-1.48881	down
ENSMUSG00000035173	Ccdc186	681	784	1485	1735	1.56962	1.90557	3.34118	3.54731	2.12158e-10	1.22558	up
ENSMUSG00000059810	Rgs3	999	1252	133	96	5.29487	6.45074	0.688857	0.416107	1.80038e-30	-3.20333	down
ENSMUSG00000002769	Gnmt	60027	68284	15767	20468	857.879	1024.26	209.229	258.446	7.88737e-25	-1.73614	down
ENSMUSG00000044715	Gskip	455	567	1697	1602	2.58252	3.29304	8.7262	8.03941	4.49237e-18	1.7822	up
ENSMUSG00000024190	Dusp1	942	1556	457	602	7.00021	12.1347	3.14977	3.94725	0.000255894	-1.15248	down
ENSMUSG00000041293	Adgrf1	1167	1293	441	620	4.47997	5.20648	1.57111	2.10169	2.72804e-06	-1.12569	down
ENSMUSG00000000184	Ccnd2	261	130	65	63	0.625355	0.367326	0.140103	0.129785	0.00399001	-1.51418	down
ENSMUSG00000050555	Hyls1	150	105	42	38	1.12098	0.821485	0.290662	0.251699	0.0032638	-1.57707	down
ENSMUSG00000055782	Abcd2	1472	733	92	151	3.93529	2.05509	0.226183	0.354518	2.30618e-15	-3.09053	down
ENSMUSG00000110353	Gm33543	1545	1111	421	505	13.4312	10.3399	3.4322	3.87853	4.56742e-09	-1.42795	down
ENSMUSG00000009863	Sdhb	12701	12741	4124	3940	164.506	173.208	49.5931	45.0868	1.16376e-34	-1.56492	down
ENSMUSG00000037820	Tgm2	4363	4974	29862	31708	17.9451	21.4705	114.056	115.238	3.72317e-94	2.81177	up
ENSMUSG00000007594	Hapln4	398	684	3165	3992	1.61271	2.90898	11.9131	14.2985	1.72184e-24	2.81154	up
ENSMUSG00000036446	Lum	340	172	92	110	2.0498	1.08604	0.511841	0.582392	0.00954397	-1.24736	down
ENSMUSG00000027879	Sec22b	2936	3558	6659	6286	16.5829	20.8162	37.8843	31.0788	1.72397e-10	1.08686	up
ENSMUSG00000031875	Cmtm3	274	168	95	89	2.50499	1.61221	0.863292	0.767811	0.00893004	-1.1684	down
ENSMUSG00000039405	Prss23	203	143	32	40	0.926497	0.745645	0.134654	0.161788	9.10559e-06	-2.1725	down
ENSMUSG00000034758	Tle6	92	155	40	35	0.670291	1.19347	0.265836	0.219666	0.0055889	-1.62929	down
ENSMUSG00000060935	Tmem263	570	679	1749	1840	2.32965	2.91245	6.89677	6.64448	6.68052e-18	1.61332	up
ENSMUSG00000042659	Arrdc4	815	805	2132	2737	3.15977	3.25885	7.58232	9.19961	1.17168e-19	1.67684	up
ENSMUSG00000003526	Prodh	12553	12639	2523	2569	78.9192	83.8553	14.7534	14.2087	2.729e-74	-2.21474	down
ENSMUSG00000020774	Aspa	862	675	269	326	9.25107	7.79832	2.7141	3.36706	5.90805e-07	-1.27756	down
ENSMUSG00000028211	Trp53inp1	4635	3377	7970	10125	12.6847	9.70075	20.2546	24.4858	6.10218e-10	1.26667	up
ENSMUSG00000027796	Smad9	982	598	68	219	2.70423	1.72843	0.173067	0.5324	3.39598e-06	-2.37791	down
ENSMUSG00000040139	9430038I01Rik	315	265	136	99	3.8458	3.50646	1.65136	1.13719	0.00133673	-1.20673	down
ENSMUSG00000024843	Chka	869	1391	2460	2651	5.42389	9.13386	14.6772	14.9085	1.15656e-06	1.2655	up
Mus_musculus_newGene_1823	Mus_musculus_newGene_1823	167	161	74	32	0.586144	0.591478	0.238868	0.094584	0.0092851	-1.52857	down
ENSMUSG00000017707	Serinc3	11705	9751	28393	34613	47.0103	41.1033	105.882	122.824	4.88344e-25	1.64505	up
ENSMUSG00000019564	Arid3a	20	70	343	505	0.053565	0.201036	0.878276	1.25294	2.85416e-09	3.31711	up
ENSMUSG00000040282	Cdin1	252	244	443	542	1.35739	1.37762	2.21878	2.58065	4.3488e-05	1.0798	up
ENSMUSG00000023951	Vegfa	12038	10701	4996	4237	59.2999	55.0999	23.3078	18.582	1.50753e-13	-1.20526	down
ENSMUSG00000103711	Tstd1	510	478	185	163	13.6841	13.4622	4.60482	3.84787	2.22384e-07	-1.41155	down
ENSMUSG00000036764	Dnajc12	707	534	4233	4799	3.60791	2.7366	19.2642	20.7902	1.08298e-57	2.9559	up
ENSMUSG00000033684	Qsox1	20192	22686	77656	88556	118.977	135.249	428.073	466.171	5.05167e-49	2.04447	up
ENSMUSG00000033685	Ucp2	679	591	1875	1905	2.55047	2.32807	6.50647	6.26595	2.31736e-22	1.6664	up
ENSMUSG00000071713	Csf2rb	163	257	522	556	0.490569	0.818768	1.45966	1.52192	8.69586e-06	1.44859	up
ENSMUSG00000030082	Sec61a1	13576	13997	33748	35412	63.3078	68.5058	146.127	145.902	8.71547e-34	1.41807	up
ENSMUSG00000030087	Klf15	14957	14424	5215	6195	98.8031	99.8815	31.4621	35.3462	3.46901e-20	-1.27428	down
ENSMUSG00000030086	Chchd6	124	146	285	284	1.62708	2.01051	3.47996	3.30223	0.000427518	1.16676	up
ENSMUSG00000030089	Slc41a3	93	113	222	224	0.568613	0.725914	1.2635	1.21545	0.00122747	1.20538	up
ENSMUSG00000030088	Aldh1l1	99522	97282	34746	36242	455.233	457.245	147.366	137.829	5.67035e-35	-1.37929	down
ENSMUSG00000031938	4931406C07Rik	14972	14445	3899	4184	87.3238	88.591	20.9901	20.7468	3.52777e-49	-1.77212	down
ENSMUSG00000031931	Ankrd49	275	401	605	713	1.53638	3.34907	4.08188	4.75133	0.000406431	1.05113	up
ENSMUSG00000003531	Dgcr6	2126	2179	1000	821	28.3072	30.3991	12.4869	9.68079	3.02479e-09	-1.14694	down
ENSMUSG00000030337	Vamp1	420	402	169	108	2.13924	2.09472	0.969901	0.608153	3.95721e-05	-1.47196	down
ENSMUSG00000031684	Slc10a7	416	515	1145	1141	1.78406	2.2507	4.41921	4.18644	1.33463e-10	1.38691	up
ENSMUSG00000035305	Ror1	231	203	579	897	0.591683	0.545741	1.37803	2.03307	4.15375e-10	1.85364	up
ENSMUSG00000026979	Psd4	100	122	207	279	0.152452	0.173794	0.267848	0.333237	0.00158126	1.21795	up
ENSMUSG00000022272	Myo10	4772	2391	1183	1287	8.78535	4.65122	1.99932	2.07004	3.31438e-06	-1.44039	down
ENSMUSG00000006014	Prg4	2679	2363	12876	12183	14.4533	12.2103	62.8763	43.8549	2.73016e-67	2.40698	up
ENSMUSG00000006010	Odr4	2520	2246	5205	5613	11.6141	10.8037	22.1692	23.4925	1.08845e-19	1.2746	up
ENSMUSG00000021610	Clptm1l	5132	5530	19448	22013	32.4364	36.6883	114.15	122.947	2.22951e-53	2.04942	up
ENSMUSG00000074170	Plekhf1	634	910	382	268	1.77932	2.68274	0.996837	0.663228	0.000478376	-1.15421	down
ENSMUSG00000044072	Eml6	26	34	223	372	0.046516	0.072254	0.401494	0.601372	6.96365e-14	3.39475	up
ENSMUSG00000027613	Eif6	2042	2191	5438	4895	20.1677	22.712	49.8817	42.7071	6.23326e-19	1.38056	up
ENSMUSG00000051748	Wfdc21	3916	3063	8081	6288	133.464	109.553	255.735	189.337	5.10797e-08	1.13885	up
ENSMUSG00000026566	Mpzl1	86	82	234	371	0.564953	0.54025	1.45707	2.15895	6.69871e-07	1.93551	up
ENSMUSG00000026568	Mpc2	9351	8288	3122	2569	135.007	125.583	41.8733	32.7537	3.72326e-19	-1.53661	down
Mus_musculus_newGene_1617	Mus_musculus_newGene_1617	305	180	29	86	1.90641	1.21812	0.15619	0.515097	0.00116513	-1.99198	down
ENSMUSG00000022177	Haus4	831	849	167	115	7.92194	8.50902	1.43237	0.942225	1.55621e-18	-2.47889	down
ENSMUSG00000109764	Klkb1	31691	27798	6735	5516	89.3043	82.2186	17.6218	13.7334	2.26405e-39	-2.18414	down
ENSMUSG00000078485	Plekhn1	531	679	268	222	2.62246	3.5083	1.21255	0.958784	3.20507e-05	-1.21147	down
ENSMUSG00000067144	Slc22a7	2424	1891	198	148	18.0381	14.7534	1.36495	0.970161	3.24648e-49	-3.5438	down
ENSMUSG00000019796	Lrp11	75	117	330	458	0.326302	0.530012	1.36962	1.77459	2.32879e-08	2.12284	up
ENSMUSG00000066892	Fbxl12	370	511	229	184	1.60377	2.89846	1.22677	1.03563	0.00340931	-1.00043	down
ENSMUSG00000054942	Miga1	166	110	417	566	0.526875	0.397233	1.23272	1.54721	1.41419e-08	1.92343	up
Mus_musculus_newGene_3504	Mus_musculus_newGene_3504	1002	881	305	250	4.07195	4.23135	1.13936	1.36477	2.43991e-12	-1.66732	down
ENSMUSG00000038244	Mical2	574	773	2076	2382	1.37544	1.9449	4.69099	5.33068	3.69545e-17	1.81527	up
ENSMUSG00000038241	Cep250	816	1174	317	270	1.53464	2.38868	0.569185	0.47302	3.69235e-09	-1.66971	down
ENSMUSG00000028737	Aldh4a1	27651	24941	7071	8463	120.937	114.488	28.7137	32.7021	9.31973e-32	-1.66876	down
Mus_musculus_newGene_2361	Mus_musculus_newGene_2361	58	43	118	246	0.792022	0.653643	1.5519	3.00413	0.000439897	1.93499	up
Mus_musculus_newGene_2363	Mus_musculus_newGene_2363	492	625	125	152	1.29024	1.55536	0.247382	0.285483	8.24189e-11	-1.92312	down
ENSMUSG00000028088	Fmo5	62449	47298	9130	9659	200.659	158.777	30.3947	29.0859	5.02193e-50	-2.45285	down
ENSMUSG00000039114	Nrn1	20006	15676	3978	3669	182.603	150.397	33.9902	29.6715	3.73512e-37	-2.12738	down
ENSMUSG00000021756	Il6st	6965	5984	12939	16785	12.0261	10.7574	20.5869	25.3863	7.24255e-14	1.28875	up
ENSMUSG00000013089	Etv5	320	291	98	120	1.18819	1.1344	0.335188	0.392772	2.99091e-05	-1.3962	down
ENSMUSG00000074657	Kif5a	116	137	42	24	0.270945	0.337441	0.091474	0.048206	0.00159805	-1.84205	down
ENSMUSG00000068686	Cd59b	161	164	60	33	3.88533	4.24632	1.32271	0.614765	0.00125194	-1.70709	down
ENSMUSG00000033184	Tmed7	2469	2000	6024	7657	27.0829	23.0319	61.3757	74.229	7.34989e-21	1.70474	up
ENSMUSG00000027360	Hdc	1220	578	292	259	7.54037	3.75121	1.67192	1.4133	2.52436e-05	-1.60787	down
[truncated: 630 more rows]

## Sheet: Table S6
ID	Description	setSize	enrichmentScore	NES	pvalue	FDR	rank	core_enrichment	Symbol
ko00910	Nitrogen metabolism	10	-0.884167	-1.92925	0.00179211	0.0131007	874	ENSMUSG00000026473;ENSMUSG00000041261;ENSMUSG00000038526;ENSMUSG00000025317;ENSMUSG00000027556;ENSMUSG00000027559	Glul;Car8;Car14;Car5a;Car1;Car3
ko00480	Glutathione metabolism	59	-0.707384	-2.28537	0.0018622	0.0131007	1163	ENSMUSG00000032350;ENSMUSG00000029864;ENSMUSG00000020309;ENSMUSG00000038155;ENSMUSG00000060803;ENSMUSG00000030004;ENSMUSG00000033318;ENSMUSG00000027890;ENSMUSG00000025068;ENSMUSG00000004341;ENSMUSG00000027800;ENSMUSG00000004035;ENSMUSG00000020649;ENSMUSG00000068762;ENSMUSG00000001663;ENSMUSG00000058135;ENSMUSG00000057103;ENSMUSG00000025934;ENSMUSG00000001665;ENSMUSG00000026688;ENSMUSG00000032348;…	Gclc;Gstk1;Chac2;Gstp2;Gstp1;Nat8;Gstt2;Gstm4;Gsto1;Gpx6;Tm4sf1;Gstm7;Rrm2;Gstm6;Gstt1;Gstm1;Nat8f1;Gsta3;Gstt3;Mgst3;Gsta4;Gstm3;Gsta1;Gm3776;Gsta2
ko04913	Ovarian steroidogenesis	30	-0.670569	-1.88713	0.0018622	0.0131007	1486	ENSMUSG00000031659;ENSMUSG00000022994;ENSMUSG00000031574;ENSMUSG00000022220;ENSMUSG00000039004;ENSMUSG00000022840;ENSMUSG00000015224;ENSMUSG00000033715;ENSMUSG00000072949;ENSMUSG00000032315;ENSMUSG00000021228;ENSMUSG00000062410;ENSMUSG00000063730;ENSMUSG00000038092	Adcy7;Adcy6;Star;Adcy4;Bmp6;Adcy5;Cyp2j9;Akr1c14;Acot1;Cyp1a1;Acot3;Hsd3b3;Hsd3b2;Hsd3b5
ko00980	Metabolism of xenobiotics by cytochrome P450	58	-0.857333	-2.76441	0.00186916	0.0131007	1238	ENSMUSG00000040562;ENSMUSG00000090124;ENSMUSG00000029260;ENSMUSG00000029864;ENSMUSG00000025479;ENSMUSG00000038155;ENSMUSG00000060803;ENSMUSG00000061906;ENSMUSG00000090165;ENSMUSG00000054630;ENSMUSG00000057425;ENSMUSG00000090175;ENSMUSG00000033318;ENSMUSG00000028743;ENSMUSG00000027890;ENSMUSG00000025068;ENSMUSG00000051483;ENSMUSG00000089943;ENSMUSG00000011382;ENSMUSG00000054757;ENSMUSG00000089960;…	Gstm2;Ugt1a7c;Ugt2b34;Gstk1;Cyp2e1;Gstp2;Gstp1;Ugt2b38;Ugt1a10;Ugt2b5;Ugt2b37;Ugt1a9;Gstt2;Akr7a5;Gstm4;Gsto1;Cbr1;Ugt1a5;Dhdh;Akr1c20;Ugt1a1;Sult2a7;Gstm7;Hsd11b1;Ephx1;Ugt2b36;Ugt2a3;Ugt1a2;Gstm6;Gstt1;Cyp2f2;Cyp1a1;Adh1;Mus_musculus_newGene_3232;Ugt2b1;Gstm1;Gsta3;Akr1c6;Gstt3;Cyp1a2;Mgst3;Gsta4;Sult2a8;Gstm3;Gsta1;Gm3776;Gsta2
ko00380	Tryptophan metabolism	41	-0.639472	-1.91438	0.00187617	0.0131007	3159	ENSMUSG00000031549;ENSMUSG00000007833;ENSMUSG00000057228;ENSMUSG00000040213;ENSMUSG00000062480;ENSMUSG00000023832;ENSMUSG00000025465;ENSMUSG00000026866;ENSMUSG00000003809;ENSMUSG00000035561;ENSMUSG00000063558;ENSMUSG00000029455;ENSMUSG00000027984;ENSMUSG00000022853;ENSMUSG00000039648;ENSMUSG00000053644;ENSMUSG00000000673;ENSMUSG00000025815;ENSMUSG00000027187;ENSMUSG00000040147;ENSMUSG00000010025;…	Ido2;Aldh16a1;Aadat;Kyat3;Acat3;Acat2;Echs1;Kynu;Gcdh;Aldh1b1;Aox1;Aldh2;Hadh;Ehhadh;Kyat1;Aldh7a1;Haao;Dhtkd1;Cat;Maob;Aldh3a2;Cyp1a1;Aox3;Cyp1a2;Afmid;Inmt
ko00591	Linoleic acid metabolism	29	-0.867536	-2.40698	0.00188324	0.0131007	573	ENSMUSG00000074882;ENSMUSG00000015224;ENSMUSG00000032808;ENSMUSG00000025004;ENSMUSG00000042248;ENSMUSG00000032310;ENSMUSG00000029630;ENSMUSG00000025197;ENSMUSG00000003053;ENSMUSG00000056035;ENSMUSG00000061292;ENSMUSG00000054827;ENSMUSG00000067225;ENSMUSG00000025002;ENSMUSG00000092008;ENSMUSG00000075552;ENSMUSG00000075551;ENSMUSG00000054417	Cyp2c68;Cyp2j9;Cyp2c38;Cyp2c40;Cyp2c37;Cyp1a2;Cyp3a25;Cyp2c23;Cyp2c29;Cyp3a11;Cyp3a59;Cyp2c50;Cyp2c54;Cyp2c55;Cyp2c69;Cyp3a41b;Cyp3a41a;Cyp3a44
ko00982	Drug metabolism - cytochrome P450	56	-0.821813	-2.6312	0.00188324	0.0131007	1238	ENSMUSG00000040562;ENSMUSG00000040170;ENSMUSG00000090124;ENSMUSG00000029260;ENSMUSG00000029864;ENSMUSG00000025479;ENSMUSG00000038155;ENSMUSG00000060803;ENSMUSG00000061906;ENSMUSG00000090165;ENSMUSG00000054630;ENSMUSG00000057425;ENSMUSG00000090175;ENSMUSG00000033318;ENSMUSG00000027890;ENSMUSG00000025068;ENSMUSG00000089943;ENSMUSG00000089960;ENSMUSG00000004035;ENSMUSG00000040147;ENSMUSG00000070704;…	Gstm2;Fmo2;Ugt1a7c;Ugt2b34;Gstk1;Cyp2e1;Gstp2;Gstp1;Ugt2b38;Ugt1a10;Ugt2b5;Ugt2b37;Ugt1a9;Gstt2;Gstm4;Gsto1;Ugt1a5;Ugt1a1;Gstm7;Maob;Ugt2b36;Fmo5;Ugt2a3;Ugt1a2;Gstm6;Gstt1;Adh1;Mus_musculus_newGene_3232;Ugt2b1;Gstm1;Aox3;Gsta3;Gstt3;Cyp1a2;Mgst3;Gsta4;Gstm3;Gsta1;Gm3776;Gsta2
ko00040	Pentose and glucuronate interconversions	28	-0.808927	-2.2208	0.00189036	0.0131007	1762	ENSMUSG00000054545;ENSMUSG00000035769;ENSMUSG00000029201;ENSMUSG00000090124;ENSMUSG00000029260;ENSMUSG00000061906;ENSMUSG00000090165;ENSMUSG00000054630;ENSMUSG00000057425;ENSMUSG00000090175;ENSMUSG00000089943;ENSMUSG00000011382;ENSMUSG00000089960;ENSMUSG00000027227;ENSMUSG00000001891;ENSMUSG00000070704;ENSMUSG00000035780;ENSMUSG00000090171;ENSMUSG00000021947;ENSMUSG00000039450;ENSMUSG00000035836	Ugt1a6a;Xylb;Ugdh;Ugt1a7c;Ugt2b34;Ugt2b38;Ugt1a10;Ugt2b5;Ugt2b37;Ugt1a9;Ugt1a5;Dhdh;Ugt1a1;Sord;Ugp2;Ugt2b36;Ugt2a3;Ugt1a2;Cryl1;Dcxr;Ugt2b1
ko00190	Oxidative phosphorylation	126	-0.473291	-1.7312	0.00189394	0.0131007	3158	ENSMUSG00000064351;ENSMUSG00000031059;ENSMUSG00000016427;ENSMUSG00000042148;ENSMUSG00000028013;ENSMUSG00000035674;ENSMUSG00000037916;ENSMUSG00000038462;ENSMUSG00000033938;ENSMUSG00000064360;ENSMUSG00000064354;ENSMUSG00000024099;ENSMUSG00000030884;ENSMUSG00000058076;ENSMUSG00000021577;ENSMUSG00000041881;ENSMUSG00000021764;ENSMUSG00000113902;ENSMUSG00000063882;ENSMUSG00000079941;ENSMUSG00000025428;…	mt-Co1;Ndufb11;Ndufa1;Cox10;Ppa2;Ndufa3;Ndufv1;Uqcrfs1;Ndufb7;mt-Nd3;mt-Co2;Ndufv2;Uqcrc2;Sdhc;Sdha;Ndufa7;Ndufs4;Ndufb1;Uqcrh;Cox5b-ps;Atp5a1;mt-Nd2;Cox8a;Ndufs3;Cox6b1;Ndufb2;Atp4a;Ndufa11;Cox5b;Atp6v1g2;Ndufab1;Ndufa9;Cox7a2;Cox4i1;Ndufs6;Atp5j2;Sdhd;Ndufa4;Ndufa10;mt-Nd1;Cox6a1;Ndufa2;Uqcrq;Cox11;Atp5h;Atp5d;Cox7b;Ndufb3;Uqcrb;Atp5j;Atp5l;Atp5o;Cox6c;Ndufb9;Ndufs5;Ndufb4;Uqcrc1;Ndufs7;Ndufa13…
ko00140	Steroid hormone biosynthesis	79	-0.767169	-2.6082	0.00191205	0.0131007	1124	ENSMUSG00000029260;ENSMUSG00000000326;ENSMUSG00000025479;ENSMUSG00000061906;ENSMUSG00000090165;ENSMUSG00000054630;ENSMUSG00000057425;ENSMUSG00000090175;ENSMUSG00000068085;ENSMUSG00000089943;ENSMUSG00000061740;ENSMUSG00000054757;ENSMUSG00000096852;ENSMUSG00000062624;ENSMUSG00000089960;Mus_musculus_newGene_3230;ENSMUSG00000016194;ENSMUSG00000074882;ENSMUSG00000000739;ENSMUSG00000070704;ENSMUSG00000…	Ugt2b34;Comt;Cyp2e1;Ugt2b38;Ugt1a10;Ugt2b5;Ugt2b37;Ugt1a9;Cyp2d11;Ugt1a5;Cyp2d22;Akr1c20;Cyp2d12;Cyp2c67;Ugt1a1;Mus_musculus_newGene_3230;Hsd11b1;Cyp2c68;Sult5a1;Ugt2b36;Ugt2a3;Ugt1a2;Akr1c14;Cyp2c38;Cyp1a1;Ugt2b1;Srd5a1;Cyp2c40;Akr1d1;Akr1c6;Cyp2c37;Cyp1a2;Cyp3a25;Cyp7a1;Cyp2c23;Cyp2c29;Hsd17b6;Cyp3a11;Cyp3a59;Cyp2c50;Cyp2c54;Cyp2c55;Cyp2c69;Hsd3b3;Hsd3b2;Hsd3b5;Cyp3a41b;Cyp3a41a;Cyp3a44
ko00590	Arachidonic acid metabolism	65	-0.655161	-2.15755	0.00191205	0.0131007	2202	ENSMUSG00000038323;ENSMUSG00000028715;ENSMUSG00000066071;ENSMUSG00000024055;ENSMUSG00000066154;ENSMUSG00000078675;ENSMUSG00000060613;ENSMUSG00000078597;ENSMUSG00000022040;ENSMUSG00000021792;ENSMUSG00000025479;ENSMUSG00000078680;ENSMUSG00000051483;ENSMUSG00000004341;ENSMUSG00000027983;ENSMUSG00000062624;ENSMUSG00000074882;ENSMUSG00000015224;ENSMUSG00000029059;ENSMUSG00000033715;ENSMUSG00000032808;…	1700066M21Rik;Cyp4a14;Cyp4a12a;Cyp4f13;Mup3;Mup16;Cyp2c70;Cyp4a12b;Ephx2;Prxl2a;Cyp2e1;Mup10;Cbr1;Gpx6;Cyp2u1;Cyp2c67;Cyp2c68;Cyp2j9;Prxl2b;Akr1c14;Cyp2c38;Cyp2c40;Cyp2c37;Cyp4f14;Ptgds;Cyp2c23;Cyp2c29;Cyp2c50;Cyp2c54;Cyp2c55;Cyp2c69
ko05204	Chemical carcinogenesis	78	-0.849542	-2.87814	0.00191939	0.0131007	1163	ENSMUSG00000090124;ENSMUSG00000029260;ENSMUSG00000029864;ENSMUSG00000025479;ENSMUSG00000038155;ENSMUSG00000060803;ENSMUSG00000030711;ENSMUSG00000061906;ENSMUSG00000090165;ENSMUSG00000054630;ENSMUSG00000057425;ENSMUSG00000090175;ENSMUSG00000033318;ENSMUSG00000027890;ENSMUSG00000025068;ENSMUSG00000051483;ENSMUSG00000089943;ENSMUSG00000062624;ENSMUSG00000089960;ENSMUSG00000094156;ENSMUSG00000004035;…	Ugt1a7c;Ugt2b34;Gstk1;Cyp2e1;Gstp2;Gstp1;Sult1a1;Ugt2b38;Ugt1a10;Ugt2b5;Ugt2b37;Ugt1a9;Gstt2;Gstm4;Gsto1;Cbr1;Ugt1a5;Cyp2c67;Ugt1a1;Sult2a7;Gstm7;Hsd11b1;Ephx1;Cyp2c68;Ugt2b36;Ugt2a3;Ugt1a2;Gstm6;Gstt1;Cyp2c38;Cyp1a1;Adh1;Ugt2b1;Gstm1;Cyp2c40;Gsta3;Gstt3;Cyp2c37;Cyp1a2;Cyp3a25;Cyp2c23;Mgst3;Cyp2c29;Cyp3a11;Cyp3a59;Cyp2c50;Gsta4;Sult2a8;Gstm3;Gsta1;Cyp2c54;Cyp2c55;Cyp2c69;Gm3776;Gsta2;Cyp3a41b;Cyp…
ko04714	Thermogenesis	190	-0.484902	-1.8622	0.00193424	0.0131007	3787	ENSMUSG00000021265;ENSMUSG00000013593;ENSMUSG00000053470;ENSMUSG00000071369;ENSMUSG00000025509;ENSMUSG00000046516;ENSMUSG00000006057;ENSMUSG00000018932;ENSMUSG00000028518;ENSMUSG00000026895;ENSMUSG00000034801;ENSMUSG00000000563;ENSMUSG00000037152;ENSMUSG00000064358;ENSMUSG00000068184;ENSMUSG00000029195;ENSMUSG00000029167;ENSMUSG00000025393;ENSMUSG00000064351;ENSMUSG00000026812;ENSMUSG00000031059;…	Slc25a29;Ndufs2;Kdm3a;Map3k5;Pnpla2;Cox17;Atp5g1;Map2k3;Prkaa2;Ndufa8;Sos2;Atp5pb;Ndufc1;mt-Co3;Ndufaf2;Klb;Ppargc1a;Atp5b;mt-Co1;Tsc1;Ndufb11;Cox19;Lipe;Ndufa1;Cox10;Ndufa3;Ndufv1;Uqcrfs1;Ndufb7;mt-Nd3;Ndufaf1;mt-Co2;Ndufv2;Uqcrc2;Sdhc;Sdha;Ndufa7;Smarca2;Cox14;Ndufs4;Ndufb1;Uqcrh;Cox5b-ps;Atp5a1;mt-Nd2;Cox8a;Ndufs3;Cox6b1;Ndufb2;Ndufa11;Cox5b;Smarcd2;Ndufab1;Ndufa9;Cox7a2;Ndufaf4;Cox4i1;Ndufs6;…
ko00830	Retinol metabolism	81	-0.777065	-2.65032	0.00193798	0.0131007	1238	ENSMUSG00000029311;ENSMUSG00000090124;ENSMUSG00000029260;ENSMUSG00000053279;ENSMUSG00000061906;ENSMUSG00000090165;ENSMUSG00000054630;ENSMUSG00000057425;ENSMUSG00000090175;ENSMUSG00000089789;ENSMUSG00000089943;ENSMUSG00000062624;ENSMUSG00000089960;ENSMUSG00000074639;ENSMUSG00000091867;ENSMUSG00000024987;ENSMUSG00000074882;ENSMUSG00000070704;ENSMUSG00000035780;ENSMUSG00000090171;ENSMUSG00000024424;…	Hsd17b11;Ugt1a7c;Ugt2b34;Aldh1a1;Ugt2b38;Ugt1a10;Ugt2b5;Ugt2b37;Ugt1a9;Rdh1;Ugt1a5;Cyp2c67;Ugt1a1;Rdh16f2;Cyp2a22;Cyp26a1;Cyp2c68;Ugt2b36;Ugt2a3;Ugt1a2;Ttc39c;Cyp2c38;Cyp1a1;Adh1;Ugt2b1;Cyp2c40;Aox3;Cyp2c37;Cyp1a2;Cyp3a25;Cyp2c23;Cyp2c29;Hsd17b6;Cyp3a11;Cyp3a59;Cyp2c50;Cyp2c54;Cyp2c55;Cyp2c69;Cyp2a5;Cyp2a4;Cyp3a41b;Cyp3a41a;Mus_musculus_newGene_1349;Cyp3a44
ko00053	Ascorbate and aldarate metabolism	25	-0.802521	-2.13423	0.00194553	0.0131007	2004	ENSMUSG00000035811;ENSMUSG00000054545;ENSMUSG00000029455;ENSMUSG00000029201;ENSMUSG00000090124;ENSMUSG00000029260;ENSMUSG00000061906;ENSMUSG00000090165;ENSMUSG00000054630;ENSMUSG00000057425;ENSMUSG00000090175;ENSMUSG00000053644;ENSMUSG00000034450;ENSMUSG00000089943;ENSMUSG00000089960;ENSMUSG00000070704;ENSMUSG00000035780;ENSMUSG00000090171;ENSMUSG00000010025;ENSMUSG00000023070;ENSMUSG00000035836	Ugt2b35;Ugt1a6a;Aldh2;Ugdh;Ugt1a7c;Ugt2b34;Ugt2b38;Ugt1a10;Ugt2b5;Ugt2b37;Ugt1a9;Aldh7a1;Gulo;Ugt1a5;Ugt1a1;Ugt2b36;Ugt2a3;Ugt1a2;Aldh3a2;Rgn;Ugt2b1
ko00071	Fatty acid degradation	46	-0.602851	-1.83352	0.00194553	0.0131007	3030	ENSMUSG00000007833;ENSMUSG00000029545;ENSMUSG00000062480;ENSMUSG00000023832;ENSMUSG00000025465;ENSMUSG00000026781;ENSMUSG00000030861;ENSMUSG00000028138;ENSMUSG00000028715;ENSMUSG00000003809;ENSMUSG00000066071;ENSMUSG00000035561;ENSMUSG00000055301;ENSMUSG00000024132;ENSMUSG00000036880;ENSMUSG00000018796;ENSMUSG00000078597;ENSMUSG00000029455;ENSMUSG00000027984;ENSMUSG00000024981;ENSMUSG00000022853;…	Aldh16a1;Acads;Acat3;Acat2;Echs1;Acbd5;Acadsb;Adh5;Cyp4a14;Gcdh;Cyp4a12a;Aldh1b1;Adh7;Eci1;Acaa2;Acsl1;Cyp4a12b;Aldh2;Hadh;Acsl5;Ehhadh;Adh4;Aldh7a1;Aldh3a2;Adh1;Acaa1b
ko04723	Retrograde endocannabinoid signaling	88	-0.530682	-1.82885	0.00194932	0.0131007	3299	ENSMUSG00000039206;ENSMUSG00000015968;ENSMUSG00000031059;ENSMUSG00000016427;ENSMUSG00000035674;ENSMUSG00000037916;ENSMUSG00000033938;ENSMUSG00000064360;ENSMUSG00000024099;ENSMUSG00000041881;ENSMUSG00000021764;ENSMUSG00000113902;ENSMUSG00000064345;ENSMUSG00000005510;ENSMUSG00000002416;ENSMUSG00000002379;ENSMUSG00000030869;ENSMUSG00000000399;ENSMUSG00000021606;ENSMUSG00000029632;ENSMUSG00000026260;…	Daglb;Cacna1d;Ndufb11;Ndufa1;Ndufa3;Ndufv1;Ndufb7;mt-Nd3;Ndufv2;Ndufa7;Ndufs4;Ndufb1;mt-Nd2;Ndufs3;Ndufb2;Ndufa11;Ndufab1;Ndufa9;Ndufs6;Ndufa4;Ndufa10;mt-Nd1;Ndufa2;Mgll;Ndufb3;Ndufb9;Ndufs5;Ndufb4;Gabrb3;Ndufs7;Ndufa13;Ndufs8;Ndufb5;Abhd6;Ndufb6;Ndufb8;Adcy7;Ndufc2;Plcb2;Adcy6;Itpr3;Gnb4;Ndufa5;Ndufv3;Ndufb10;Adcy4;Ndufa12;Gng11;Ndufa6;Adcy5;Mapk12;Slc17a8;Faah
ko04726	Serotonergic synapse	72	-0.663562	-2.21648	0.00195695	0.0131007	1726	ENSMUSG00000068086;ENSMUSG00000060613;ENSMUSG00000094806;ENSMUSG00000040061;ENSMUSG00000024190;ENSMUSG00000022469;ENSMUSG00000042644;ENSMUSG00000027669;ENSMUSG00000032766;ENSMUSG00000022840;ENSMUSG00000068085;ENSMUSG00000061740;ENSMUSG00000096852;ENSMUSG00000062624;ENSMUSG00000040147;Mus_musculus_newGene_3230;ENSMUSG00000074882;ENSMUSG00000015224;ENSMUSG00000032808;Mus_musculus_newGene_3232;ENSMU…	Cyp2d9;Cyp2c70;Cyp2d10;Plcb2;Dusp1;Rapgef3;Itpr3;Gnb4;Gng11;Adcy5;Cyp2d11;Cyp2d22;Cyp2d12;Cyp2c67;Maob;Mus_musculus_newGene_3230;Cyp2c68;Cyp2j9;Cyp2c38;Mus_musculus_newGene_3232;Cyp2c40;Cyp2c37;Cyp2c23;Cyp2c29;Cyp2c50;Cyp2c54;Cyp2c55;Cyp2c69
ko04976	Bile secretion	72	-0.6262	-2.09168	0.00195695	0.0131007	1969	ENSMUSG00000042476;ENSMUSG00000024411;ENSMUSG00000030236;ENSMUSG00000020865;ENSMUSG00000035811;ENSMUSG00000054545;ENSMUSG00000030382;ENSMUSG00000004655;ENSMUSG00000023829;ENSMUSG00000031659;ENSMUSG00000022994;ENSMUSG00000090124;ENSMUSG00000029260;ENSMUSG00000022220;ENSMUSG00000061906;ENSMUSG00000090165;ENSMUSG00000027562;ENSMUSG00000054630;ENSMUSG00000057425;ENSMUSG00000090175;ENSMUSG00000022840;…	Abcb4;Aqp4;Slco1b2;Abcc3;Ugt2b35;Ugt1a6a;Slc27a5;Aqp1;Slc22a1;Adcy7;Adcy6;Ugt1a7c;Ugt2b34;Adcy4;Ugt2b38;Ugt1a10;Car2;Ugt2b5;Ugt2b37;Ugt1a9;Adcy5;Nr0b2;Ugt1a5;Abcb1a;Atp1b1;Ugt1a1;Sult2a7;Abcb11;Ephx1;Slc10a1;Abcg8;Ugt2b36;Ugt2a3;Ugt1a2;Abcg5;Ugt2b1;Aqp8;Slc22a7;Slco1a1;Cyp7a1;Slco1a4;Sult2a8
ko00983	Drug metabolism - other enzymes	89	-0.798918	-2.75603	0.00196078	0.0131007	1163	ENSMUSG00000047394;ENSMUSG00000090124;ENSMUSG00000029260;ENSMUSG00000025479;ENSMUSG00000038155;ENSMUSG00000060803;ENSMUSG00000061906;ENSMUSG00000090165;ENSMUSG00000054630;ENSMUSG00000057425;ENSMUSG00000090175;ENSMUSG00000033318;ENSMUSG00000031886;ENSMUSG00000024177;ENSMUSG00000073435;ENSMUSG00000055730;ENSMUSG00000027890;ENSMUSG00000022304;ENSMUSG00000078964;ENSMUSG00000025068;ENSMUSG00000089943;…	Odf3b;Ugt1a7c;Ugt2b34;Cyp2e1;Gstp2;Gstp1;Ugt2b38;Ugt1a10;Ugt2b5;Ugt2b37;Ugt1a9;Gstt2;Ces2e;Nme4;Nme3;Ces2a;Gstm4;Dpys;Ces1b;Gsto1;Ugt1a5;Ugt1a1;Ces1c;Dut;Gstm7;Upp1;Ugt2b36;Ugt2a3;Ugt1a2;Ces2c;Rrm2;Gstm6;Gstt1;Mus_musculus_newGene_1701;Ugt2b1;Gstm1;Gsta3;Ces1e;Ces1g;Gstt3;Tk1;Mgst3;Mus_musculus_newGene_1703;Gsta4;Gstm3;Gsta1;Gm3776;Upp2;Ces1f;Gsta2;Ces1d
ko05418	Fluid shear stress and atherosclerosis	110	-0.464133	-1.65349	0.00196464	0.0131007	1351	ENSMUSG00000023951;ENSMUSG00000025856;ENSMUSG00000040562;ENSMUSG00000038155;ENSMUSG00000060803;ENSMUSG00000062960;ENSMUSG00000033318;ENSMUSG00000031740;ENSMUSG00000027890;ENSMUSG00000022610;ENSMUSG00000025068;ENSMUSG00000109061;ENSMUSG00000004035;ENSMUSG00000076441;ENSMUSG00000068762;ENSMUSG00000001663;ENSMUSG00000058135;ENSMUSG00000020623;ENSMUSG00000025934;ENSMUSG00000001665;ENSMUSG00000026688;…	Vegfa;Pdgfa;Gstm2;Gstp2;Gstp1;Kdr;Gstt2;Mmp2;Gstm4;Mapk12;Gsto1;Gm49320;Gstm7;Ass1;Gstm6;Gstt1;Gstm1;Map2k6;Gsta3;Gstt3;Mgst3;Gsta4;Gstm3;Gsta1;Gm3776;Gsta2
ko04750	Inflammatory mediator regulation of TRP channels	74	-0.607513	-2.03138	0.0019685	0.0131007	1560	ENSMUSG00000078597;ENSMUSG00000031659;ENSMUSG00000040061;ENSMUSG00000022994;ENSMUSG00000042644;ENSMUSG00000022220;ENSMUSG00000022514;ENSMUSG00000022840;ENSMUSG00000022610;ENSMUSG00000062624;ENSMUSG00000074882;ENSMUSG00000015224;ENSMUSG00000066513;ENSMUSG00000032808;ENSMUSG00000025004;ENSMUSG00000020623;ENSMUSG00000042248;ENSMUSG00000025197;ENSMUSG00000003053;ENSMUSG00000054827;ENSMUSG00000067225;…	Cyp4a12b;Adcy7;Plcb2;Adcy6;Itpr3;Adcy4;Il1rap;Adcy5;Mapk12;Cyp2c67;Cyp2c68;Cyp2j9;Klk1b4;Cyp2c38;Cyp2c40;Map2k6;Cyp2c37;Cyp2c23;Cyp2c29;Cyp2c50;Cyp2c54;Cyp2c55;Cyp2c69
ko04062	Chemokine signaling pathway	113	0.461979	1.63461	0.00202429	0.0131007	1774	ENSMUSG00000023078;ENSMUSG00000029380;ENSMUSG00000035385;ENSMUSG00000018927;ENSMUSG00000058427;ENSMUSG00000021508;ENSMUSG00000034855;ENSMUSG00000020431;ENSMUSG00000029371;ENSMUSG00000031805;ENSMUSG00000004040;ENSMUSG00000020901;ENSMUSG00000003283;ENSMUSG00000028874;ENSMUSG00000015950;ENSMUSG00000034116;ENSMUSG00000033220;ENSMUSG00000003228;ENSMUSG00000030595;ENSMUSG00000028698;ENSMUSG00000042249;…	Cxcl13;Cxcl1;Ccl2;Ccl6;Cxcl2;Cxcl14;Cxcl10;Adcy1;Cxcl5;Jak3;Stat3;Pik3r5;Hck;Fgr;Ncf1;Vav1;Rac2;Grk5;Nfkbib;Pik3r3;Grk3;Cxcl9;Stat2;Nfkb1;Shc1;Elmo1;Nras
ko04380	Osteoclast differentiation	89	0.527137	1.80203	0.00203252	0.0131007	2055	ENSMUSG00000023964;ENSMUSG00000038037;ENSMUSG00000053113;ENSMUSG00000002983;ENSMUSG00000026072;ENSMUSG00000025225;ENSMUSG00000015947;ENSMUSG00000020941;ENSMUSG00000020689;ENSMUSG00000052837;ENSMUSG00000059089;ENSMUSG00000029135;ENSMUSG00000052684;ENSMUSG00000058818;ENSMUSG00000015950;ENSMUSG00000014599;ENSMUSG00000112148;ENSMUSG00000030341;ENSMUSG00000015755;ENSMUSG00000035158;ENSMUSG00000022965;…	Calcr;Socs1;Socs3;Relb;Il1r1;Nfkb2;Fcgr1;Map3k14;Itgb3;Junb;Fcgr4;Fosl2;Jun;Pirb;Ncf1;Csf1;Lilrb4a;Tnfrsf1a;Tab2;Mitf;Ifngr2;Irf9;Pik3r3;Sirpa;Stat2;Spi1;Ncf2;Nfkb1;Ifnar1;Fcgr3;Mapk14;Nfkbia;Lcp2;Stat1
ko05142	Chagas disease	70	0.568473	1.86507	0.00204082	0.0131007	1955	ENSMUSG00000020826;ENSMUSG00000037411;ENSMUSG00000027995;ENSMUSG00000035385;Mus_musculus_newGene_310;ENSMUSG00000020431;ENSMUSG00000024164;ENSMUSG00000024778;ENSMUSG00000052684;ENSMUSG00000032508;ENSMUSG00000003814;ENSMUSG00000030341;ENSMUSG00000022965;ENSMUSG00000031392;ENSMUSG00000059883;ENSMUSG00000028698;ENSMUSG00000047123;ENSMUSG00000028163;ENSMUSG00000036905;ENSMUSG00000053436;ENSMUSG000000…	Nos2;Serpine1;Tlr2;Ccl2;Mus_musculus_newGene_310;Adcy1;C3;Fas;Jun;Myd88;Calr;Tnfrsf1a;Ifngr2;Irak1;Irak4;Pik3r3;Ticam1;Nfkb1;C1qb;Mapk14;Nfkbia
ko05162	Measles	104	0.518811	1.80637	0.00204082	0.0131007	1757	ENSMUSG00000026012;ENSMUSG00000027995;ENSMUSG00000019850;Mus_musculus_newGene_2170;ENSMUSG00000019979;ENSMUSG00000042349;ENSMUSG00000024778;ENSMUSG00000031805;ENSMUSG00000004040;Mus_musculus_newGene_3415;ENSMUSG00000052684;ENSMUSG00000032508;ENSMUSG00000024079;ENSMUSG00000021277;ENSMUSG00000027951;ENSMUSG00000040296;ENSMUSG00000015755;ENSMUSG00000066861;ENSMUSG00000052776;ENSMUSG00000030595;ENSMU…	Cd28;Tlr2;Tnfaip3;Mus_musculus_newGene_2170;Apaf1;Ikbke;Fas;Jak3;Stat3;Mus_musculus_newGene_3415;Jun;Myd88;Eif2ak2;Traf3;Adar;Ddx58;Tab2;Oas1g;Oas1a;Nfkbib;Irf9;Irak1;Eif2ak3;Irak4;Pik3r3;Tbk1;Stat2;Nfkb1;Ifih1;Ifnar1
ko03060	Protein export	25	0.743527	2.00384	0.00204918	0.0131007	2276	ENSMUSG00000032553;ENSMUSG00000026864;ENSMUSG00000054408;ENSMUSG00000030082;ENSMUSG00000024516;ENSMUSG00000079108;ENSMUSG00000035227;ENSMUSG00000021917;ENSMUSG00000112449;ENSMUSG00000073079;ENSMUSG00000032042;ENSMUSG00000078974;ENSMUSG00000014504;ENSMUSG00000036323;ENSMUSG00000053317;ENSMUSG00000020780;ENSMUSG00000026511;ENSMUSG00000019802;ENSMUSG00000025724	Srprb;Hspa5;Spcs3;Sec61a1;Sec11c;Srp54c;Spcs2;Spcs1;Srp54b;Srp54a;Srpr;Sec61g;Srp19;Srp72;Sec61b;Srp68;Srp9;Sec63;Sec11a
ko05134	Legionellosis	48	0.605836	1.8543	0.00204918	0.0131007	686	ENSMUSG00000051439;ENSMUSG00000029380;ENSMUSG00000027995;ENSMUSG00000030786;ENSMUSG00000058427;ENSMUSG00000019979;ENSMUSG00000024164;ENSMUSG00000025225;ENSMUSG00000000290;ENSMUSG00000032508	Cd14;Cxcl1;Tlr2;Itgam;Cxcl2;Apaf1;C3;Nfkb2;Itgb2;Myd88
ko04141	Protein processing in endoplasmic reticulum	173	0.528819	1.9795	0.00205339	0.0131007	2818	ENSMUSG00000009092;ENSMUSG00000027006;ENSMUSG00000025823;ENSMUSG00000004460;ENSMUSG00000022136;ENSMUSG00000032115;ENSMUSG00000027828;ENSMUSG00000020048;ENSMUSG00000037470;ENSMUSG00000030062;ENSMUSG00000020571;ENSMUSG00000032116;ENSMUSG00000026864;ENSMUSG00000043019;ENSMUSG00000020964;ENSMUSG00000003814;ENSMUSG00000032437;ENSMUSG00000025130;ENSMUSG00000027248;ENSMUSG00000039234;ENSMUSG00000024079;…	Derl3;Dnajc10;Pdia4;Dnajb11;Dnajc3;Hyou1;Ssr3;Hsp90b1;Uggt1;Rpn1;Pdia6;Stt3a;Hspa5;Edem3;Sel1l;Calr;Stt3b;P4hb;Pdia3;Sec24d;Eif2ak2;Uggt2;Ssr1;Edem2;Edem1;Sec61a1;Ddost;Ssr2;Ube2g2;Atf6b;Erp29;Sec61g;Syvn1;Ero1a;Rnf185;Wfs1;Selenos;Sec23b;Tram1;Eif2ak3;Hspa4l;Xbp1;Ero1b;Cul1;Hsp90aa1;Atf6;Rpn2;Ssr4;Mbtps2;Rrbp1;Plaa;Ubxn4;Ube2j1;Sec13;Sec61b;Lman2;Dnajc1;Ubxn2a;Derl1;Preb;Txndc11;Lman1;Erlec1;Ubx…
ko05152	Tuberculosis	119	0.475901	1.6926	0.00207039	0.0131007	686	ENSMUSG00000038600;ENSMUSG00000020826;ENSMUSG00000051439;ENSMUSG00000032484;ENSMUSG00000027995;ENSMUSG00000030786;Mus_musculus_newGene_2170;ENSMUSG00000016024;ENSMUSG00000019979;ENSMUSG00000041135;Mus_musculus_newGene_1096;ENSMUSG00000024164;ENSMUSG00000015947;ENSMUSG00000059089;ENSMUSG00000000290;ENSMUSG00000032508	Atp6v0a4;Nos2;Cd14;Ngp;Tlr2;Itgam;Mus_musculus_newGene_2170;Lbp;Apaf1;Ripk2;Mus_musculus_newGene_1096;C3;Fcgr1;Fcgr4;Itgb2;Myd88
ko05164	Influenza A	121	0.457546	1.63418	0.00207039	0.0131007	1833	ENSMUSG00000035385;Mus_musculus_newGene_2170;ENSMUSG00000037405;ENSMUSG00000053113;ENSMUSG00000034855;ENSMUSG00000019979;ENSMUSG00000042349;ENSMUSG00000024778;ENSMUSG00000024810;ENSMUSG00000022136;Mus_musculus_newGene_3415;ENSMUSG00000032508;ENSMUSG00000024079;ENSMUSG00000021277;ENSMUSG00000027951;ENSMUSG00000000385;ENSMUSG00000040296;ENSMUSG00000030341;ENSMUSG00000022965;ENSMUSG00000066861;ENSMU…	Ccl2;Mus_musculus_newGene_2170;Icam1;Socs3;Cxcl10;Apaf1;Ikbke;Fas;Il33;Dnajc3;Mus_musculus_newGene_3415;Myd88;Eif2ak2;Traf3;Adar;Tmprss2;Ddx58;Tnfrsf1a;Ifngr2;Oas1g;Rsad2;Oas1a;Nfkbib;Tlr3;Irf9;Irak4;Pik3r3;Tbk1;Nup98;Actb;Stat2;Trim25;Ticam1;Nfkb1;Ifih1;Ifnar1;Actg1
ko04060	Cytokine-cytokine receptor interaction	98	0.503533	1.73847	0.00207469	0.0131007	986	ENSMUSG00000026981;ENSMUSG00000023078;ENSMUSG00000029380;ENSMUSG00000035385;ENSMUSG00000022146;ENSMUSG00000018927;ENSMUSG00000058427;ENSMUSG00000021508;ENSMUSG00000034855;ENSMUSG00000037035;ENSMUSG00000026072;ENSMUSG00000037157;ENSMUSG00000024778;ENSMUSG00000029371;ENSMUSG00000024810;ENSMUSG00000002897;ENSMUSG00000017057;ENSMUSG00000000532;ENSMUSG00000071713;ENSMUSG00000021756;ENSMUSG00000044244;…	Il1rn;Cxcl13;Cxcl1;Ccl2;Osmr;Ccl6;Cxcl2;Cxcl14;Cxcl10;Inhbb;Il1r1;Il22ra1;Fas;Cxcl5;Il33;Il17ra;Il13ra1;Acvr1b;Csf2rb;Il6st;Il20rb;Csf1;Tnfrsf1a;Tnfrsf12a;Thpo
ko04668	TNF signaling pathway	94	0.58732	2.01775	0.002079	0.0131007	996	ENSMUSG00000029380;ENSMUSG00000019850;ENSMUSG00000035385;ENSMUSG00000037405;ENSMUSG00000053113;ENSMUSG00000058427;ENSMUSG00000034855;ENSMUSG00000078922;Mus_musculus_newGene_310;ENSMUSG00000078920;ENSMUSG00000017737;ENSMUSG00000024778;ENSMUSG00000078921;ENSMUSG00000029371;Mus_musculus_newGene_2313;ENSMUSG00000020941;ENSMUSG00000000957;ENSMUSG00000052837;ENSMUSG00000053175;ENSMUSG00000052684;ENSMUS…	Cxcl1;Tnfaip3;Ccl2;Icam1;Socs3;Cxcl2;Cxcl10;Tgtp1;Mus_musculus_newGene_310;Ifi47;Mmp9;Fas;Tgtp2;Cxcl5;Mus_musculus_newGene_2313;Map3k14;Mmp14;Junb;Bcl3;Jun;Birc2;Mlkl;Map3k8;Traf3;Birc3;Atf6b;Csf1;Tnfrsf1a;Tab2
ko04064	NF-kappa B signaling pathway	65	0.630595	2.03372	0.00208768	0.0131007	1685	ENSMUSG00000051439;ENSMUSG00000029380;ENSMUSG00000019850;ENSMUSG00000021453;ENSMUSG00000037405;ENSMUSG00000058427;ENSMUSG00000002983;ENSMUSG00000016024;ENSMUSG00000026072;Mus_musculus_newGene_310;ENSMUSG00000015312;ENSMUSG00000025225;ENSMUSG00000020941;ENSMUSG00000057367;ENSMUSG00000032508;ENSMUSG00000021277;ENSMUSG00000032000;ENSMUSG00000040296;ENSMUSG00000030341;ENSMUSG00000015755;ENSMUSG000000…	Cd14;Cxcl1;Tnfaip3;Gadd45g;Icam1;Cxcl2;Relb;Lbp;Il1r1;Mus_musculus_newGene_310;Gadd45b;Nfkb2;Map3k14;Birc2;Myd88;Traf3;Birc3;Ddx58;Tnfrsf1a;Tab2;Erc1;Irak1;Irak4;Trim25;Tirap;Ticam1;Nfkb1;Bcl10
ko05140	Leishmaniasis	49	0.558003	1.70909	0.00208768	0.0131007	2055	ENSMUSG00000020826;ENSMUSG00000027995;ENSMUSG00000030786;ENSMUSG00000027009;ENSMUSG00000024164;ENSMUSG00000015340;ENSMUSG00000015947;ENSMUSG00000059089;ENSMUSG00000000290;ENSMUSG00000052684;ENSMUSG00000032508;ENSMUSG00000015950;ENSMUSG00000015755;ENSMUSG00000022965;ENSMUSG00000030595;ENSMUSG00000031392;ENSMUSG00000059883;ENSMUSG00000026480;ENSMUSG00000028163;ENSMUSG00000059498;ENSMUSG00000004266;…	Nos2;Tlr2;Itgam;Itga4;C3;Cybb;Fcgr1;Fcgr4;Itgb2;Jun;Myd88;Ncf1;Tab2;Ifngr2;Nfkbib;Irak1;Irak4;Ncf2;Nfkb1;Fcgr3;Ptpn6;Mapk14;Nfkbia;Stat1
ko04657	IL-17 signaling pathway	62	0.632563	2.02173	0.00210084	0.0131007	785	ENSMUSG00000026822;ENSMUSG00000056054;ENSMUSG00000029380;ENSMUSG00000019850;ENSMUSG00000035385;ENSMUSG00000056071;ENSMUSG00000058427;ENSMUSG00000034855;ENSMUSG00000042349;ENSMUSG00000017737;ENSMUSG00000029371;ENSMUSG00000020048;ENSMUSG00000002897;ENSMUSG00000052684;ENSMUSG00000021277	Lcn2;S100a8;Cxcl1;Tnfaip3;Ccl2;S100a9;Cxcl2;Cxcl10;Ikbke;Mmp9;Cxcl5;Hsp90b1;Il17ra;Jun;Traf3
ko04061	Viral protein interaction with cytokine and cytokine receptor	28	0.728727	2.0053	0.00211416	0.0131007	973	ENSMUSG00000023078;ENSMUSG00000029380;ENSMUSG00000035385;ENSMUSG00000018927;ENSMUSG00000058427;ENSMUSG00000021508;ENSMUSG00000034855;ENSMUSG00000037157;ENSMUSG00000029371;ENSMUSG00000021756;ENSMUSG00000044244;ENSMUSG00000014599;ENSMUSG00000030341	Cxcl13;Cxcl1;Ccl2;Ccl6;Cxcl2;Cxcl14;Cxcl10;Il22ra1;Cxcl5;Il6st;Il20rb;Csf1;Tnfrsf1a
ko05160	Hepatitis C	127	0.473536	1.69361	0.00211416	0.0131007	1774	ENSMUSG00000023067;Mus_musculus_newGene_2170;ENSMUSG00000053113;ENSMUSG00000034855;ENSMUSG00000019979;ENSMUSG00000042349;Mus_musculus_newGene_310;ENSMUSG00000024778;ENSMUSG00000047109;ENSMUSG00000004040;Mus_musculus_newGene_3415;ENSMUSG00000022346;ENSMUSG00000034459;ENSMUSG00000047230;ENSMUSG00000024079;ENSMUSG00000021277;ENSMUSG00000040296;ENSMUSG00000030341;ENSMUSG00000066861;ENSMUSG00000020641…	Cdkn1a;Mus_musculus_newGene_2170;Socs3;Cxcl10;Apaf1;Ikbke;Mus_musculus_newGene_310;Fas;Cldn14;Stat3;Mus_musculus_newGene_3415;Myc;Ifit1;Cldn2;Eif2ak2;Traf3;Ddx58;Tnfrsf1a;Oas1g;Rsad2;Oas1a;Tlr3;Irf9;Eif2ak3;Pik3r3;Tbk1;Stat2;Ticam1;Nfkb1;Egfr;Ifnar1;Nras
ko04621	NOD-like receptor signaling pathway	138	0.481262	1.73968	0.00212314	0.0131007	1955	ENSMUSG00000032484;ENSMUSG00000029380;ENSMUSG00000019850;ENSMUSG00000035385;ENSMUSG00000058427;ENSMUSG00000028270;ENSMUSG00000078817;ENSMUSG00000041135;ENSMUSG00000042349;ENSMUSG00000015340;ENSMUSG00000033538;ENSMUSG00000042659;ENSMUSG00000052684;ENSMUSG00000105504;ENSMUSG00000057367;ENSMUSG00000078606;ENSMUSG00000032508;ENSMUSG00000045868;ENSMUSG00000021277;ENSMUSG00000029338;ENSMUSG00000032000;…	Ngp;Cxcl1;Tnfaip3;Ccl2;Cxcl2;Gbp2;Nlrp12;Ripk2;Ikbke;Cybb;Casp4;Arrdc4;Jun;Gbp5;Birc2;Gvin2;Myd88;Gvin1;Traf3;Antxr2;Birc3;Ifi211;Tab2;Oas1g;Gsdmd;Oas1a;Nfkbib;Irf9;Itpr1;Irak4;Lpp;Hsp90aa1;Tbk1;Stat2;Naip2;Ticam1;P2rx7;Nod1;Nfkb1;Gbp3;Gabarap;Ifnar1;Tank;Mapk14;Nfkbia
ko05133	Pertussis	55	0.632943	1.96747	0.00217391	0.0131007	1950	ENSMUSG00000020826;ENSMUSG00000051439;ENSMUSG00000030786;ENSMUSG00000024164;ENSMUSG00000029371;ENSMUSG00000000290;ENSMUSG00000052684;ENSMUSG00000032508;ENSMUSG00000026405;ENSMUSG00000023224;ENSMUSG00000073418;Mus_musculus_newGene_3511;ENSMUSG00000031392;ENSMUSG00000059883;ENSMUSG00000032041;ENSMUSG00000047123;ENSMUSG00000038058;ENSMUSG00000028163;ENSMUSG00000018899;ENSMUSG00000036905;ENSMUSG00000…	Nos2;Cd14;Itgam;C3;Cxcl5;Itgb2;Jun;Myd88;C4bp;Serping1;C4b;Mus_musculus_newGene_3511;Irak1;Irak4;Tirap;Ticam1;Nod1;Nfkb1;Irf1;C1qb;Mapk14
ko00280	Valine, leucine and isoleucine degradation	55	-0.541344	-1.73597	0.00369004	0.0202992	3013	ENSMUSG00000057880;ENSMUSG00000022186;ENSMUSG00000029545;ENSMUSG00000062480;ENSMUSG00000021646;ENSMUSG00000021238;ENSMUSG00000030826;ENSMUSG00000028601;ENSMUSG00000023832;ENSMUSG00000025465;ENSMUSG00000031969;ENSMUSG00000030861;ENSMUSG00000060376;ENSMUSG00000025260;ENSMUSG00000027709;ENSMUSG00000035561;ENSMUSG00000041650;ENSMUSG00000063558;ENSMUSG00000036880;ENSMUSG00000021460;ENSMUSG00000029455;…	Abat;Oxct1;Acads;Acat3;Mccc2;Aldh6a1;Bcat2;Echdc2;Acat2;Echs1;Acad8;Acadsb;Bckdha;Hsd17b10;Mccc1;Aldh1b1;Pcca;Aox1;Acaa2;Auh;Aldh2;Hadh;Ehhadh;Ivd;Hibadh;Mcee;Aldh7a1;Aacs;Aldh3a2;Aox3;Acaa1b
ko00340	Histidine metabolism	22	-0.717363	-1.85902	0.00378788	0.0202992	2013	ENSMUSG00000035561;ENSMUSG00000029455;ENSMUSG00000020017;ENSMUSG00000020774;ENSMUSG00000027360;ENSMUSG00000053644;ENSMUSG00000034456;ENSMUSG00000015890;ENSMUSG00000040147;ENSMUSG00000075289;ENSMUSG00000010025;ENSMUSG00000026986	Aldh1b1;Aldh2;Hal;Aspa;Hdc;Aldh7a1;Uroc1;Amdhd1;Maob;Carns1;Aldh3a2;Hnmt
ko05225	Hepatocellular carcinoma	134	-0.444404	-1.64089	0.00378788	0.0202992	1863	ENSMUSG00000031714;ENSMUSG00000029070;ENSMUSG00000021611;ENSMUSG00000016933;ENSMUSG00000045005;ENSMUSG00000003849;ENSMUSG00000020888;ENSMUSG00000018983;ENSMUSG00000002109;ENSMUSG00000018486;ENSMUSG00000000782;ENSMUSG00000040562;ENSMUSG00000027490;ENSMUSG00000038155;ENSMUSG00000060803;ENSMUSG00000049791;ENSMUSG00000033318;ENSMUSG00000027890;ENSMUSG00000041075;ENSMUSG00000036904;ENSMUSG00000025068;…	Gab1;Mxra8;Tert;Plcg1;Fzd5;Nqo1;Dvl2;E2f2;Ddb2;Wnt9b;Tcf7;Gstm2;E2f1;Gstp2;Gstp1;Fzd4;Gstt2;Gstm4;Fzd7;Fzd8;Gsto1;Ccnd1;Txnrd3;Gstm7;Gm20518;Gstm6;Gstt1;Gstm1;Gsta3;Gstt3;Mgst3;Gsta4;Gstm3;Gsta1;Gm3776;Gsta2
ko01524	Platinum drug resistance	71	-0.518262	-1.7186	0.00396825	0.0202992	967	ENSMUSG00000060803;ENSMUSG00000033318;ENSMUSG00000027890;ENSMUSG00000025068;ENSMUSG00000004035;ENSMUSG00000068762;ENSMUSG00000001663;ENSMUSG00000058135;ENSMUSG00000025934;ENSMUSG00000001665;ENSMUSG00000026688;ENSMUSG00000032348;ENSMUSG00000004038;ENSMUSG00000074183;ENSMUSG00000111709;ENSMUSG00000057933	Gstp1;Gstt2;Gstm4;Gsto1;Gstm7;Gstm6;Gstt1;Gstm1;Gsta3;Gstt3;Mgst3;Gsta4;Gstm3;Gsta1;Gm3776;Gsta2
ko05169	Epstein-Barr virus infection	170	0.404075	1.51294	0.0040404	0.0202992	1428	ENSMUSG00000023067;ENSMUSG00000027995;ENSMUSG00000019850;ENSMUSG00000021453;Mus_musculus_newGene_2170;ENSMUSG00000037405;ENSMUSG00000034855;ENSMUSG00000002983;ENSMUSG00000019979;ENSMUSG00000042349;ENSMUSG00000023947;ENSMUSG00000015312;ENSMUSG00000025225;ENSMUSG00000024778;ENSMUSG00000031805;ENSMUSG00000035692;ENSMUSG00000004040;ENSMUSG00000020941;ENSMUSG00000022346;ENSMUSG00000052684;ENSMUSG00000…	Cdkn1a;Tlr2;Tnfaip3;Gadd45g;Mus_musculus_newGene_2170;Icam1;Cxcl10;Relb;Apaf1;Ikbke;Nfkbie;Gadd45b;Nfkb2;Fas;Jak3;Isg15;Stat3;Map3k14;Myc;Jun;Myd88;Calr;Pdia3;Eif2ak2;Traf3;Ddx58;Tab2;Oas1g;Tapbp;Oas1a;Nfkbib;Irf9;Irak1;Irak4;Pik3r3;Itgal;Tbk1;Nedd4;Tap1
ko04610	Complement and coagulation cascades	84	0.501071	1.69454	0.00408998	0.0202992	1696	ENSMUSG00000030111;ENSMUSG00000037411;ENSMUSG00000030786;ENSMUSG00000028001;ENSMUSG00000033831;ENSMUSG00000033860;ENSMUSG00000024164;ENSMUSG00000021999;ENSMUSG00000026365;ENSMUSG00000090231;ENSMUSG00000000290;ENSMUSG00000026405;ENSMUSG00000023224;ENSMUSG00000073418;Mus_musculus_newGene_3511;ENSMUSG00000040552;ENSMUSG00000022912;ENSMUSG00000037780;ENSMUSG00000017344;ENSMUSG00000022037;ENSMUSG00000…	A2m;Serpine1;Itgam;Fga;Fgb;Fgg;C3;Cpb2;Cfh;Cfb;Itgb2;C4bp;Serping1;C4b;Mus_musculus_newGene_3511;C3ar1;Pros1;Mbl1;Vtn;Clu;F8;Vsig4;Thbd;F11
ko05222	Small cell lung cancer	82	0.496551	1.66863	0.0041841	0.0202992	1305	ENSMUSG00000020826;ENSMUSG00000023067;ENSMUSG00000015533;ENSMUSG00000021453;ENSMUSG00000031502;ENSMUSG00000019979;ENSMUSG00000015312;ENSMUSG00000026193;ENSMUSG00000031503;ENSMUSG00000022346;ENSMUSG00000057367;ENSMUSG00000021277;ENSMUSG00000032000;ENSMUSG00000060579;ENSMUSG00000027111;ENSMUSG00000026639;ENSMUSG00000028698	Nos2;Cdkn1a;Itga2;Gadd45g;Col4a1;Apaf1;Gadd45b;Fn1;Col4a2;Myc;Birc2;Traf3;Birc3;Fhit;Itga6;Lamb3;Pik3r3
ko04145	Phagosome	131	0.463608	1.67187	0.00419287	0.0202992	1942	ENSMUSG00000038600;ENSMUSG00000051439;ENSMUSG00000015533;ENSMUSG00000022032;ENSMUSG00000027995;ENSMUSG00000026390;ENSMUSG00000030786;ENSMUSG00000045136;Mus_musculus_newGene_1096;ENSMUSG00000024164;ENSMUSG00000002944;ENSMUSG00000015340;ENSMUSG00000058672;ENSMUSG00000015947;ENSMUSG00000020689;ENSMUSG00000059089;ENSMUSG00000000290;ENSMUSG00000029125;ENSMUSG00000025044;ENSMUSG00000003814;ENSMUSG00000…	Atp6v0a4;Cd14;Itga2;Scara5;Tlr2;Marco;Itgam;Tubb2b;Mus_musculus_newGene_1096;C3;Cd36;Cybb;Tubb2a;Fcgr1;Itgb3;Fcgr4;Itgb2;Stx18;Msr1;Calr;Sec61a1;Ctsl;Ncf1;Sec61g;Mbl1;Sec22b;Tubb5;Tap1;Actb;Sftpd;Tfrc;Tuba1c;Tuba8;Ncf2;Atp6v0e;Sec61b;Actg1;Fcgr3;H2-D1;Atp6v1a;Atp6v0a2
ko05323	Rheumatoid arthritis	50	0.546013	1.67849	0.00420168	0.0202992	944	ENSMUSG00000038600;ENSMUSG00000026012;ENSMUSG00000029380;ENSMUSG00000027995;ENSMUSG00000035385;ENSMUSG00000037405;ENSMUSG00000058427;Mus_musculus_newGene_1096;ENSMUSG00000029371;ENSMUSG00000000290;ENSMUSG00000052684;ENSMUSG00000022901;ENSMUSG00000021477;ENSMUSG00000014599	Atp6v0a4;Cd28;Cxcl1;Tlr2;Ccl2;Icam1;Cxcl2;Mus_musculus_newGene_1096;Cxcl5;Itgb2;Jun;Cd86;Ctsl;Csf1
ko04120	Ubiquitin mediated proteolysis	145	0.435303	1.58617	0.00421053	0.0202992	3582	ENSMUSG00000038037;Mus_musculus_newGene_2177;ENSMUSG00000046417;ENSMUSG00000053113;ENSMUSG00000035299;ENSMUSG00000035941;ENSMUSG00000057367;ENSMUSG00000032000;ENSMUSG00000017146;ENSMUSG00000024589;ENSMUSG00000009293;ENSMUSG00000038545;ENSMUSG00000027078;ENSMUSG00000054752;ENSMUSG00000024807;ENSMUSG00000020271;ENSMUSG00000019505;Mus_musculus_newGene_2992;ENSMUSG00000029686;ENSMUSG00000032216;ENSMU…	Socs1;Mus_musculus_newGene_2177;Lrrc75a;Socs3;Mid1;Ibtk;Birc2;Birc3;Brca1;Nedd4l;Ube2g2;Cul7;Ube2l6;Fsd1l;Syvn1;Fbxw11;Ubb;Mus_musculus_newGene_2992;Cul1;Nedd4;Map3k1;Siah1b;Ube2j1;Ube2e2;Cdc27;Ube4a;Trip12;Anapc4;Det1;Spryd4;Ubr5;Ddb1;Rps27a;Cdc16;Fbxw7;Uba6;Smurf2;Uba7;Traf6;Wwp2;Anapc1;Pml;Ube2f;Ube3c;Fbxo4;Mdm2;Herc2;Rnf7;Ube3a;Ubox5;Uba1;Ube2o;Ube4b;Ube2z;Cul5;Cblb;Vhl
ko00360	Phenylalanine metabolism	14	-0.75976	-1.798	0.00530035	0.0250522	1073	ENSMUSG00000033307;ENSMUSG00000029445;ENSMUSG00000040147;ENSMUSG00000020051;ENSMUSG00000024694	Mif;Hpd;Maob;Pah;Keg1
ko05146	Amoebiasis	69	0.53129	1.7401	0.00613497	0.0284394	644	ENSMUSG00000020826;ENSMUSG00000051439;ENSMUSG00000029380;ENSMUSG00000027995;ENSMUSG00000030786;ENSMUSG00000058427;ENSMUSG00000031502;ENSMUSG00000026072;ENSMUSG00000020431;ENSMUSG00000026193;ENSMUSG00000031503;ENSMUSG00000000290;ENSMUSG00000042842	Nos2;Cd14;Cxcl1;Tlr2;Itgam;Cxcl2;Col4a1;Il1r1;Adcy1;Fn1;Col4a2;Itgb2;Serpinb6b
ko02010	ABC transporters	39	-0.559974	-1.6597	0.00750469	0.0341326	2219	ENSMUSG00000044748;ENSMUSG00000026198;ENSMUSG00000025194;ENSMUSG00000020620;ENSMUSG00000042476;ENSMUSG00000020865;ENSMUSG00000041797;ENSMUSG00000028127;ENSMUSG00000029299;ENSMUSG00000026944;ENSMUSG00000040584;ENSMUSG00000030834;ENSMUSG00000027048;ENSMUSG00000024254;ENSMUSG00000040505;ENSMUSG00000055782;ENSMUSG00000041828	Defb1;Abcb6;Abcc2;Abca8b;Abcb4;Abcc3;Abca9;Abcd3;Abcg3;Abca2;Abcb1a;Abcc6;Abcb11;Abcg8;Abcg5;Abcd2;Abca8a
ko01212	Fatty acid metabolism	56	-0.511744	-1.63845	0.0094162	0.0408398	2897	ENSMUSG00000029545;ENSMUSG00000062480;ENSMUSG00000073422;ENSMUSG00000023832;ENSMUSG00000025465;ENSMUSG00000030861;ENSMUSG00000036880;ENSMUSG00000018796;ENSMUSG00000021364;ENSMUSG00000027984;ENSMUSG00000024981;ENSMUSG00000022853;ENSMUSG00000031708;ENSMUSG00000032349;ENSMUSG00000010663;ENSMUSG00000020532;ENSMUSG00000041220;ENSMUSG00000024665;ENSMUSG00000048445;ENSMUSG00000038754;ENSMUSG00000025153;…	Acads;Acat3;H2-Ke6;Acat2;Echs1;Acadsb;Acaa2;Acsl1;Elovl2;Hadh;Acsl5;Ehhadh;Tecr;Elovl5;Fads1;Acaca;Elovl6;Fads2;Ccdc57;Elovl3;Fasn;Scd1;Acaa1b
ko04925	Aldosterone synthesis and secretion	56	-0.531426	-1.70147	0.0094162	0.0408398	1702	ENSMUSG00000024070;ENSMUSG00000030653;ENSMUSG00000031659;ENSMUSG00000040061;ENSMUSG00000022994;ENSMUSG00000042644;ENSMUSG00000026463;ENSMUSG00000031574;ENSMUSG00000022220;ENSMUSG00000022840;ENSMUSG00000027931;ENSMUSG00000026576;ENSMUSG00000062410;ENSMUSG00000063730;ENSMUSG00000038092	Prkd3;Gm45837;Adcy7;Plcb2;Adcy6;Itpr3;Atp2b4;Star;Adcy4;Adcy5;Npr1;Atp1b1;Hsd3b3;Hsd3b2;Hsd3b5
ko04932	Non-alcoholic fatty liver disease	132	-0.403856	-1.48511	0.00948767	0.0408398	3144	ENSMUSG00000031059;ENSMUSG00000016427;ENSMUSG00000035674;ENSMUSG00000037916;ENSMUSG00000031834;ENSMUSG00000038462;ENSMUSG00000033938;ENSMUSG00000064354;ENSMUSG00000024099;ENSMUSG00000030884;ENSMUSG00000058076;ENSMUSG00000021577;ENSMUSG00000041881;ENSMUSG00000021764;ENSMUSG00000113902;ENSMUSG00000063882;ENSMUSG00000079941;ENSMUSG00000035885;ENSMUSG00000005510;ENSMUSG00000036751;ENSMUSG00000002416;…	Ndufb11;Ndufa1;Ndufa3;Ndufv1;Pik3r2;Uqcrfs1;Ndufb7;mt-Co2;Ndufv2;Uqcrc2;Sdhc;Sdha;Ndufa7;Ndufs4;Ndufb1;Uqcrh;Cox5b-ps;Cox8a;Ndufs3;Cox6b1;Ndufb2;Ndufa11;Cox5b;Ndufab1;Ndufa9;Cox7a2;Cox4i1;Ndufs6;Sdhd;Ndufa4;Ndufa10;Cox6a1;Ndufa2;Uqcrq;Cox7b;Ndufb3;Casp3;Uqcrb;Cox6c;Ndufb9;Ndufs5;Ndufb4;Uqcrc1;Ndufs7;Ndufa13;Ndufs8;Cox7c;Ndufb5;Cebpa;Ndufb6;Ndufb8;Uqcr10;Ndufc2;Cyc1;Uqcr11;Ndufa5;Ndufv3;Cox5a;Nduf…
ko04979	Cholesterol metabolism	48	-0.529908	-1.63076	0.00972763	0.0411381	1666	ENSMUSG00000032081;ENSMUSG00000020402;ENSMUSG00000017754;ENSMUSG00000002985;ENSMUSG00000040564;ENSMUSG00000031574;ENSMUSG00000026170;ENSMUSG00000005681;ENSMUSG00000027048;ENSMUSG00000024254;ENSMUSG00000109350;ENSMUSG00000053846;ENSMUSG00000040505;ENSMUSG00000037606;ENSMUSG00000032207;ENSMUSG00000028553;ENSMUSG00000047822;ENSMUSG00000028240	Apoc3;Vdac1;Pltp;Apoe;Apoc1;Star;Cyp27a1;Apoa2;Abcb11;Abcg8;Gm44805;Lipg;Abcg5;Osbpl5;Lipc;Angptl3;Angptl8;Cyp7a1
ko00510	N-Glycan biosynthesis	50	0.52685	1.61959	0.0105042	0.0430067	3363	ENSMUSG00000022885;ENSMUSG00000028413;ENSMUSG00000036155;ENSMUSG00000030062;ENSMUSG00000035845;ENSMUSG00000032116;ENSMUSG00000032437;ENSMUSG00000028757;ENSMUSG00000035704;ENSMUSG00000093752;ENSMUSG00000021065;ENSMUSG00000032123;ENSMUSG00000027642;ENSMUSG00000024085;ENSMUSG00000032059;ENSMUSG00000050786;ENSMUSG00000035671;ENSMUSG00000022174;ENSMUSG00000036646;ENSMUSG00000039740;ENSMUSG00000043998;…	St6gal1;B4galt1;Mgat5;Rpn1;Alg12;Stt3a;Stt3b;Ddost;Alg8;Gm20716;Fut8;Dpagt1;Rpn2;Man2a1;Alg9;Ccdc126;Zswim4;Dad1;Man1b1;Alg2;Mgat2;Man1a2;Ganab;Alg3;TUSC3;Glt28d2;Alg10b;Zswim5;Alg14;Mogs
ko05235	PD-L1 expression and PD-1 checkpoint pathway in cancer	63	0.485775	1.55499	0.0105263	0.0430067	2576	ENSMUSG00000026012;ENSMUSG00000027995;ENSMUSG00000023947;ENSMUSG00000004040;ENSMUSG00000052684;ENSMUSG00000016496;ENSMUSG00000032508;ENSMUSG00000022965;ENSMUSG00000021109;ENSMUSG00000030595;ENSMUSG00000028698;ENSMUSG00000032041;ENSMUSG00000047123;ENSMUSG00000028163;ENSMUSG00000020122;ENSMUSG00000027852;ENSMUSG00000004266;ENSMUSG00000053436;ENSMUSG00000021025;ENSMUSG00000026104;ENSMUSG00000004221;…	Cd28;Tlr2;Nfkbie;Stat3;Jun;Cd274;Myd88;Ifngr2;Hif1a;Nfkbib;Pik3r3;Tirap;Ticam1;Nfkb1;Egfr;Nras;Ptpn6;Mapk14;Nfkbia;Stat1;Ikbkg;Ptpn11;Kras;Ppp3cc
ko00790	Folate biosynthesis	22	-0.661946	-1.71541	0.0113636	0.0456539	2314	ENSMUSG00000038323;ENSMUSG00000026621;ENSMUSG00000032067;ENSMUSG00000073481;ENSMUSG00000020098;ENSMUSG00000021496;ENSMUSG00000021707;ENSMUSG00000015806;ENSMUSG00000051483;ENSMUSG00000037580;ENSMUSG00000033715;ENSMUSG00000020051	1700066M21Rik;Mtarc1;Pts;Mtarc2;Pcbd1;Pcbd2;Dhfr;Qdpr;Cbr1;Gch1;Akr1c14;Pah
ko01200	Carbon metabolism	110	-0.419976	-1.49618	0.0137525	0.0543453	2925	ENSMUSG00000053838;ENSMUSG00000025503;ENSMUSG00000029545;ENSMUSG00000043445;ENSMUSG00000062480;ENSMUSG00000025950;ENSMUSG00000058076;ENSMUSG00000021577;ENSMUSG00000020321;ENSMUSG00000005683;ENSMUSG00000021238;ENSMUSG00000025991;ENSMUSG00000028307;ENSMUSG00000023832;ENSMUSG00000030541;ENSMUSG00000025465;ENSMUSG00000000171;ENSMUSG00000020863;ENSMUSG00000031400;ENSMUSG00000028138;ENSMUSG00000021748;…	Nudcd3;Taldo1;Acads;Pgp;Acat3;Idh1;Sdhc;Sdha;Mdh1;Cs;Aldh6a1;Cps1;Aldob;Acat2;Idh2;Echs1;Sdhd;Luc7l3;G6pdx;Adh5;Pdhb;Pcca;Gcsh;Aco1;Eno3;Dlat;Prps2;Idh3b;Me1;Shmt2;Ehhadh;Gpi1;Eno1b;Gapdh;Agxt;Tkfc;Eno1;Pfkm;Mcee;Tkt;Sdhb;Shmt1;Rpia;Aldoc;Cat;Gpt;Gm3839;Pklr;Acss2;Rgn;Gck
ko05161	Hepatitis B	127	0.401952	1.43759	0.0147992	0.0575383	1964	ENSMUSG00000023067;ENSMUSG00000027995;Mus_musculus_newGene_2170;ENSMUSG00000019979;ENSMUSG00000042349;ENSMUSG00000017737;ENSMUSG00000024778;ENSMUSG00000031805;ENSMUSG00000004040;ENSMUSG00000022346;ENSMUSG00000052684;ENSMUSG00000032508;ENSMUSG00000021277;ENSMUSG00000015461;ENSMUSG00000040296;ENSMUSG00000015755;ENSMUSG00000031639;ENSMUSG00000031392;ENSMUSG00000059883;ENSMUSG00000028698;ENSMUSG00000…	Cdkn1a;Tlr2;Mus_musculus_newGene_2170;Apaf1;Ikbke;Mmp9;Fas;Jak3;Stat3;Myc;Jun;Myd88;Traf3;Atf6b;Ddx58;Tab2;Tlr3;Irak1;Irak4;Pik3r3;Tbk1;Map3k1;Stat2;Creb3l2;Tirap;Ticam1;Nfkb1;Ifih1;Ifnar1;Nras;Mapk14;Nfkbia;Ddx3x
ko04620	Toll-like receptor signaling pathway	70	0.481705	1.5804	0.0163265	0.0624691	2055	ENSMUSG00000051439;ENSMUSG00000027995;ENSMUSG00000034855;ENSMUSG00000016024;ENSMUSG00000042349;ENSMUSG00000052684;ENSMUSG00000032508;ENSMUSG00000024235;ENSMUSG00000021277;ENSMUSG00000022901;ENSMUSG00000015755;ENSMUSG00000031639;ENSMUSG00000031392;ENSMUSG00000059883;ENSMUSG00000028698;ENSMUSG00000020115;ENSMUSG00000029417;ENSMUSG00000032041;ENSMUSG00000047123;ENSMUSG00000028163;ENSMUSG00000022967;…	Cd14;Tlr2;Cxcl10;Lbp;Ikbke;Jun;Myd88;Map3k8;Traf3;Cd86;Tab2;Tlr3;Irak1;Irak4;Pik3r3;Tbk1;Cxcl9;Tirap;Ticam1;Nfkb1;Ifnar1;Mapk14;Nfkbia;Stat1
ko00410	beta-Alanine metabolism	26	-0.585683	-1.57079	0.0174419	0.0656938	3953	ENSMUSG00000074064;ENSMUSG00000026687;ENSMUSG00000029098;ENSMUSG00000041426;ENSMUSG00000007833;ENSMUSG00000057880;ENSMUSG00000029545;ENSMUSG00000021238;ENSMUSG00000025465;ENSMUSG00000033427;ENSMUSG00000033308;ENSMUSG00000035561;ENSMUSG00000029455;ENSMUSG00000022853;ENSMUSG00000078651;ENSMUSG00000053644;ENSMUSG00000022304;ENSMUSG00000075289;ENSMUSG00000010025	Mlycd;Aldh9a1;Acox3;Hibch;Aldh16a1;Abat;Acads;Aldh6a1;Echs1;Upb1;Dpyd;Aldh1b1;Aldh2;Ehhadh;Aoc2;Aldh7a1;Dpys;Carns1;Aldh3a2
ko01040	Biosynthesis of unsaturated fatty acids	33	-0.553347	-1.57986	0.0190476	0.0706381	1568	ENSMUSG00000052392;ENSMUSG00000028937;ENSMUSG00000031708;ENSMUSG00000032349;ENSMUSG00000010663;ENSMUSG00000041220;ENSMUSG00000024665;ENSMUSG00000072949;ENSMUSG00000038754;ENSMUSG00000037071;ENSMUSG00000021228;ENSMUSG00000010651	Acot4;Acot7;Tecr;Elovl5;Fads1;Elovl6;Fads2;Acot1;Elovl3;Scd1;Acot3;Acaa1b
ko00010	Glycolysis / Gluconeogenesis	57	-0.487679	-1.57193	0.0204082	0.0734347	2264	ENSMUSG00000028138;ENSMUSG00000035561;ENSMUSG00000055301;ENSMUSG00000021748;ENSMUSG00000060600;ENSMUSG00000000168;ENSMUSG00000029455;ENSMUSG00000036427;ENSMUSG00000059040;ENSMUSG00000037797;ENSMUSG00000057666;ENSMUSG00000078650;ENSMUSG00000063524;ENSMUSG00000033065;ENSMUSG00000053644;ENSMUSG00000030246;ENSMUSG00000017390;ENSMUSG00000035473;ENSMUSG00000097148;ENSMUSG00000041237;ENSMUSG00000010025;…	Adh5;Aldh1b1;Adh7;Pdhb;Eno3;Dlat;Aldh2;Gpi1;Eno1b;Adh4;Gapdh;G6pc;Eno1;Pfkm;Aldh7a1;Ldhb;Aldoc;Galm;Gm3839;Pklr;Aldh3a2;Acss2;Adh1;Gck
ko04115	p53 signaling pathway	67	0.478366	1.55815	0.0204499	0.0734347	344	ENSMUSG00000023067;ENSMUSG00000037411;ENSMUSG00000021453;Mus_musculus_newGene_2170;ENSMUSG00000019979;ENSMUSG00000015312;ENSMUSG00000024778	Cdkn1a;Serpine1;Gadd45g;Mus_musculus_newGene_2170;Apaf1;Gadd45b;Fas
ko00020	Citrate cycle (TCA cycle)	29	-0.566622	-1.5721	0.0207156	0.0734347	3961	ENSMUSG00000061838;ENSMUSG00000022477;ENSMUSG00000019179;ENSMUSG00000027513;ENSMUSG00000022110;ENSMUSG00000002010;ENSMUSG00000052738;ENSMUSG00000053838;ENSMUSG00000040618;ENSMUSG00000025950;ENSMUSG00000058076;ENSMUSG00000021577;ENSMUSG00000020321;ENSMUSG00000005683;ENSMUSG00000030541;ENSMUSG00000000171;ENSMUSG00000021748;ENSMUSG00000028405;ENSMUSG00000000168;ENSMUSG00000027406;ENSMUSG00000009863;…	Suclg2;Aco2;Mdh2;Pck1;Sucla2;Idh3g;Suclg1;Nudcd3;Pck2;Idh1;Sdhc;Sdha;Mdh1;Cs;Idh2;Sdhd;Pdhb;Aco1;Dlat;Idh3b;Sdhb;Acly
ko00630	Glyoxylate and dicarboxylate metabolism	29	-0.562658	-1.56109	0.0244821	0.0855287	2819	ENSMUSG00000062480;ENSMUSG00000020321;ENSMUSG00000005683;ENSMUSG00000023832;ENSMUSG00000025176;ENSMUSG00000041650;ENSMUSG00000034424;ENSMUSG00000028405;ENSMUSG00000025403;ENSMUSG00000026272;ENSMUSG00000033429;ENSMUSG00000020534;ENSMUSG00000026473;ENSMUSG00000027187;ENSMUSG00000027605;ENSMUSG00000017718	Acat3;Mdh1;Cs;Acat2;Hoga1;Pcca;Gcsh;Aco1;Shmt2;Agxt;Mcee;Shmt1;Glul;Cat;Acss2;Afmid
ko05012	Parkinson disease	205	-0.353879	-1.3701	0.0253411	0.0872649	3529	ENSMUSG00000042165;ENSMUSG00000026895;ENSMUSG00000090137;ENSMUSG00000005981;ENSMUSG00000058927;ENSMUSG00000000563;ENSMUSG00000037152;ENSMUSG00000064358;ENSMUSG00000025094;ENSMUSG00000021771;ENSMUSG00000025393;ENSMUSG00000064351;ENSMUSG00000031059;ENSMUSG00000068240;ENSMUSG00000016427;ENSMUSG00000035674;ENSMUSG00000037916;ENSMUSG00000028964;ENSMUSG00000038462;ENSMUSG00000033938;ENSMUSG00000064360;…	Gm9774;Ndufa8;Uba52;Trap1;Gm10053;Atp5pb;Ndufc1;mt-Co3;Slc18a2;Vdac2;Atp5b;mt-Co1;Ndufb11;Gm11808;Ndufa1;Ndufa3;Ndufv1;Park7;Uqcrfs1;Ndufb7;mt-Nd3;Tuba4a;mt-Co2;Ndufv2;Uqcrc2;Sdhc;Sdha;Ndufa7;Casp9;Ndufs4;Ndufb1;Uqcrh;Cox5b-ps;Atp5a1;mt-Nd2;Cox8a;Ndufs3;Cox6b1;Slc25a5;Ndufb2;Ndufa11;Cox5b;Ndufab1;Ndufa9;Cox7a2;Cox4i1;Ndufs6;Slc25a4;Sdhd;Ndufa4;Ndufa10;mt-Nd1;Cox6a1;Ndufa2;Uqcrq;Sem1;Atp5h;Atp5d;C…
ko05200	Pathways in cancer	367	-0.302036	-1.23739	0.0257426	0.0873988	1837	ENSMUSG00000019966;ENSMUSG00000029070;ENSMUSG00000000303;ENSMUSG00000021611;ENSMUSG00000032035;ENSMUSG00000038167;ENSMUSG00000035105;ENSMUSG00000016933;ENSMUSG00000017386;ENSMUSG00000034957;ENSMUSG00000045005;ENSMUSG00000027276;ENSMUSG00000003849;ENSMUSG00000031659;ENSMUSG00000020888;ENSMUSG00000014850;ENSMUSG00000018983;ENSMUSG00000040061;ENSMUSG00000020357;ENSMUSG00000022994;ENSMUSG00000026923;…	Kitl;Mxra8;Cdh1;Tert;Ets1;Plekhg6;Egln3;Plcg1;Traf4;Cebpa;Fzd5;Jag1;Nqo1;Adcy7;Dvl2;Msh3;E2f2;Plcb2;Flt4;Adcy6;Notch1;Ddb2;Bmp2;Flt3l;Vegfa;Lama4;Pdgfa;Gnb4;Wnt9b;Tcf7;Il2rb;Rasgrp4;Rara;Gstm2;Ccna2;Fgf2;Lamb1;E2f1;Adcy4;Hes1;Dapk2;Rasgrp2;Lamb2;Notch4;Gstp2;Gng11;Gstp1;Ednrb;Fzd4;Ar;Il12rb1;Ccnd2;Brca2;Gstt2;Notch3;Adcy5;Plekhg5;Kit;Mmp2;Gstm4;Fzd7;Fzd8;Gsto1;Ccnd1;Txnrd3;Fgfr3;Vegfb;Gstm7;Gm205…
ko00601	Glycosphingolipid biosynthesis - lacto and neolacto series	10	0.739668	1.61091	0.027027	0.0904852	979	ENSMUSG00000034780;ENSMUSG00000028413;ENSMUSG00000051650;ENSMUSG00000027808;ENSMUSG00000032038	B3galt1;B4galt1;B3gnt2;Serp1;St3gal4
ko00061	Fatty acid biosynthesis	14	-0.685743	-1.62283	0.0282686	0.0933453	1739	ENSMUSG00000018796;ENSMUSG00000042010;ENSMUSG00000024981;ENSMUSG00000020532;ENSMUSG00000048445;ENSMUSG00000025153	Acsl1;Acacb;Acsl5;Acaca;Ccdc57;Fasn
ko00450	Selenocompound metabolism	18	-0.64461	-1.61071	0.0305755	0.0995988	1415	ENSMUSG00000039648;ENSMUSG00000000811;ENSMUSG00000028179;ENSMUSG00000024899;ENSMUSG00000003477	Kyat1;Txnrd3;Cth;Papss2;Inmt
ko00514	Other types of O-glycan biosynthesis	35	0.536632	1.53351	0.0344086	0.10958	3112	ENSMUSG00000022769;ENSMUSG00000022885;ENSMUSG00000028413;ENSMUSG00000034807;ENSMUSG00000089704;ENSMUSG00000034126;ENSMUSG00000026047;ENSMUSG00000031608;ENSMUSG00000020520;ENSMUSG00000046020;ENSMUSG00000034064;ENSMUSG00000026796;ENSMUSG00000034487;ENSMUSG00000028538;ENSMUSG00000042460;ENSMUSG00000038072;ENSMUSG00000035245;ENSMUSG00000036197;ENSMUSG00000004846	Sdf2l1;St6gal1;B4galt1;Colgalt1;Galnt2;Pomt2;Poglut2;Galnt7;Galnt10;Pofut1;Poglut1;Niban2;Poglut3;St3gal3;C1galt1;Galnt11;Eogt;Gxylt1;Plod3
ko05016	Huntington disease	241	-0.32705	-1.29265	0.0345489	0.10958	3206	ENSMUSG00000021771;ENSMUSG00000025393;ENSMUSG00000064351;ENSMUSG00000033020;ENSMUSG00000031059;ENSMUSG00000016427;ENSMUSG00000035674;ENSMUSG00000037916;ENSMUSG00000038462;ENSMUSG00000033938;ENSMUSG00000064360;ENSMUSG00000026202;ENSMUSG00000064354;ENSMUSG00000002948;ENSMUSG00000045996;ENSMUSG00000024099;ENSMUSG00000030884;ENSMUSG00000058076;ENSMUSG00000021577;ENSMUSG00000041881;ENSMUSG00000028914;…	Vdac2;Atp5b;mt-Co1;Polr2f;Ndufb11;Ndufa1;Ndufa3;Ndufv1;Uqcrfs1;Ndufb7;mt-Nd3;Tuba4a;mt-Co2;Map2k7;Polr2k;Ndufv2;Uqcrc2;Sdhc;Sdha;Ndufa7;Casp9;Ndufs4;Ndufb1;Uqcrh;Cox5b-ps;Atp5a1;mt-Nd2;Cox8a;Ndufs3;Cox6b1;Slc25a5;Ndufb2;Ndufa11;Cox5b;Ndufab1;Ndufa9;Cox7a2;Cox4i1;Ndufs6;Slc25a4;Sdhd;Ndufa4;Ndufa10;mt-Nd1;Cox6a1;Ndufa2;Gpx1;Polr2h;Uqcrq;Sem1;Atp5h;Atp5d;Cox7b;Ndufb3;Ulk1;Casp3;Uqcrb;Slc1a2;Atp5j;At…
ko05145	Toxoplasmosis	79	0.430439	1.43915	0.0354906	0.111105	1298	ENSMUSG00000020826;ENSMUSG00000027995;ENSMUSG00000038037;ENSMUSG00000069874;ENSMUSG00000004040;ENSMUSG00000020901;ENSMUSG00000078853;ENSMUSG00000057367;ENSMUSG00000032508;ENSMUSG00000032000;ENSMUSG00000046879;ENSMUSG00000030341;ENSMUSG00000015755;ENSMUSG00000022965;ENSMUSG00000027111;ENSMUSG00000030595;ENSMUSG00000031392;ENSMUSG00000059883;ENSMUSG00000026639	Nos2;Tlr2;Socs1;Irgm2;Stat3;Pik3r5;Igtp;Birc2;Myd88;Birc3;Irgm1;Tnfrsf1a;Tab2;Ifngr2;Itga6;Nfkbib;Irak1;Irak4;Lamb3
ko05226	Gastric cancer	99	0.400545	1.38525	0.0373444	0.11541	559	ENSMUSG00000030017;ENSMUSG00000071356;ENSMUSG00000023067;ENSMUSG00000021453;ENSMUSG00000015312;ENSMUSG00000021994;ENSMUSG00000022346	Reg3g;Reg3b;Cdkn1a;Gadd45g;Gadd45b;Wnt5a;Myc
ko04630	JAK-STAT signaling pathway	88	0.415223	1.41697	0.0388548	0.118273	1757	ENSMUSG00000023067;ENSMUSG00000038037;ENSMUSG00000022146;ENSMUSG00000053113;ENSMUSG00000037157;ENSMUSG00000032578;ENSMUSG00000031805;ENSMUSG00000004040;ENSMUSG00000022346;ENSMUSG00000017057;ENSMUSG00000071713;ENSMUSG00000024539;ENSMUSG00000021756;ENSMUSG00000044244;ENSMUSG00000022847;ENSMUSG00000022965;ENSMUSG00000002325;ENSMUSG00000028698;ENSMUSG00000024014;ENSMUSG00000040033;ENSMUSG00000030748;…	Cdkn1a;Socs1;Osmr;Socs3;Il22ra1;Cish;Jak3;Stat3;Myc;Il13ra1;Csf2rb;Ptpn2;Il6st;Il20rb;Thpo;Ifngr2;Irf9;Pik3r3;Pim1;Stat2;Il4ra;Egfr;Ifnar1
ko00260	Glycine, serine and threonine metabolism	37	-0.506989	-1.49209	0.0392523	0.118273	1353	ENSMUSG00000027199;ENSMUSG00000078651;ENSMUSG00000025270;ENSMUSG00000026272;ENSMUSG00000009614;ENSMUSG00000020534;ENSMUSG00000053644;ENSMUSG00000006378;ENSMUSG00000002769;ENSMUSG00000017453;ENSMUSG00000028179;ENSMUSG00000040147;ENSMUSG00000020150	Gatm;Aoc2;Alas2;Agxt;Sardh;Shmt1;Aldh7a1;Gcat;Gnmt;Pipox;Cth;Maob;Gamt
ko05150	Staphylococcus aureus infection	47	0.475413	1.4613	0.0402414	0.119406	1194	ENSMUSG00000032484;ENSMUSG00000030786;ENSMUSG00000037405;ENSMUSG00000033860;ENSMUSG00000024164;ENSMUSG00000026365;ENSMUSG00000015947;ENSMUSG00000090231;ENSMUSG00000059089;ENSMUSG00000000290;ENSMUSG00000052270;ENSMUSG00000045551;ENSMUSG00000073418;Mus_musculus_newGene_3511;ENSMUSG00000040552;ENSMUSG00000037780;ENSMUSG00000023043	Ngp;Itgam;Icam1;Fgg;C3;Cfh;Fcgr1;Cfb;Fcgr4;Itgb2;Fpr2;Fpr1;C4b;Mus_musculus_newGene_3511;C3ar1;Mbl1;Krt18
ko05020	Prion disease	219	-0.331752	-1.29995	0.040619	0.119406	3179	ENSMUSG00000021771;ENSMUSG00000025393;ENSMUSG00000064351;ENSMUSG00000031059;ENSMUSG00000016427;ENSMUSG00000035674;ENSMUSG00000037916;ENSMUSG00000031834;ENSMUSG00000038462;ENSMUSG00000033938;ENSMUSG00000064360;ENSMUSG00000026202;ENSMUSG00000064354;ENSMUSG00000024099;ENSMUSG00000030884;ENSMUSG00000058076;ENSMUSG00000021577;ENSMUSG00000041881;ENSMUSG00000028914;ENSMUSG00000021764;ENSMUSG00000113902;…	Vdac2;Atp5b;mt-Co1;Ndufb11;Ndufa1;Ndufa3;Ndufv1;Pik3r2;Uqcrfs1;Ndufb7;mt-Nd3;Tuba4a;mt-Co2;Ndufv2;Uqcrc2;Sdhc;Sdha;Ndufa7;Casp9;Ndufs4;Ndufb1;Uqcrh;Ppp3ca;Prnp;Cox5b-ps;Atp5a1;mt-Nd2;Cox8a;Ndufs3;Cox6b1;Slc25a5;Ndufb2;Ndufa11;Prkcd;Cox5b;Ndufab1;Ndufa9;Cox7a2;Cox4i1;Ndufs6;Slc25a4;Sdhd;Ndufa4;Ndufa10;mt-Nd1;Cox6a1;Ndufa2;Uqcrq;Sem1;Atp5h;Atp5d;Cox7b;Ndufb3;Casp3;Uqcrb;Atp5j;Atp5o;Cox6c;Ndufb9;Ndu…
ko05132	Salmonella infection	193	0.340962	1.29581	0.043299	0.125751	2106	ENSMUSG00000051439;ENSMUSG00000027995;ENSMUSG00000027907;ENSMUSG00000041135;ENSMUSG00000051344;ENSMUSG00000033538;ENSMUSG00000020048;ENSMUSG00000036885;ENSMUSG00000022346;ENSMUSG00000009013;ENSMUSG00000052684;ENSMUSG00000057367;ENSMUSG00000027805;ENSMUSG00000032508;ENSMUSG00000012519;ENSMUSG00000054364;ENSMUSG00000032000;Mus_musculus_newGene_1916;ENSMUSG00000030341;ENSMUSG00000015755;ENSMUSG00000…	Cd14;Tlr2;S100a11;Ripk2;Plekhm3;Casp4;Hsp90b1;Arhgef26;Myc;Dynll1;Jun;Birc2;Pfn2;Myd88;Mlkl;Rhob;Birc3;Mus_musculus_newGene_1916;Tnfrsf1a;Tab2;Gcc2;Gsdmd;Irak1;Pik3c2a;Acbd3;Irak4;Arf6;Hsp90aa1;Anxa2;S100a10;Actb;Naip2;Tirap;Nod1;Nfkb1;Elmo1;Arpc1b;Actg1;Cyth4;Mapk14;Nfkbia;Nckap1;Arf1;Tgoln1;Arf2
ko04217	Necroptosis	110	0.388935	1.3701	0.0446247	0.128058	1631	ENSMUSG00000019850;ENSMUSG00000027514;Mus_musculus_newGene_2170;Mus_musculus_newGene_310;ENSMUSG00000024778;ENSMUSG00000015340;ENSMUSG00000031805;ENSMUSG00000024810;ENSMUSG00000004040;ENSMUSG00000057367;ENSMUSG00000012519;ENSMUSG00000024079;ENSMUSG00000032000;ENSMUSG00000030341;ENSMUSG00000033059;ENSMUSG00000022965;ENSMUSG00000031639;ENSMUSG00000002325;ENSMUSG00000021270;ENSMUSG00000060429;ENSMUS…	Tnfaip3;Zbp1;Mus_musculus_newGene_2170;Mus_musculus_newGene_310;Fas;Cybb;Jak3;Il33;Stat3;Birc2;Mlkl;Eif2ak2;Birc3;Tnfrsf1a;Pygb;Ifngr2;Tlr3;Irf9;Hsp90aa1;Sntb1;Chmp4b;Stat2;Chmp2b;Smpd1;Ticam1;Camk2b
ko04210	Apoptosis	120	0.380818	1.3578	0.0453608	0.128639	2502	ENSMUSG00000021453;Mus_musculus_newGene_2170;ENSMUSG00000019979;Mus_musculus_newGene_310;ENSMUSG00000015312;ENSMUSG00000024778;ENSMUSG00000020941;ENSMUSG00000052684;ENSMUSG00000057367;ENSMUSG00000071713;ENSMUSG00000032000;ENSMUSG00000021477;ENSMUSG00000023249;ENSMUSG00000030341;ENSMUSG00000030560;ENSMUSG00000030102;ENSMUSG00000031668;ENSMUSG00000028698;ENSMUSG00000029580;ENSMUSG00000043091;ENSMUS…	Gadd45g;Mus_musculus_newGene_2170;Apaf1;Mus_musculus_newGene_310;Gadd45b;Fas;Map3k14;Jun;Birc2;Csf2rb;Birc3;Ctsl;Parp3;Tnfrsf1a;Ctsc;Itpr1;Eif2ak3;Pik3r3;Actb;Tuba1c;Tuba8;Nfkb1;Nras;Actg1;Pdpk1;Nfkbia;Lmna;Daxx;Ctso;Ikbkg;Cflar;Ptpn13;Kras;Ctss
ko04623	Cytosolic DNA-sensing pathway	39	0.51307	1.49033	0.0490405	0.137457	2449	ENSMUSG00000027514;ENSMUSG00000034855;ENSMUSG00000042349;ENSMUSG00000024810;ENSMUSG00000027951;ENSMUSG00000040296;ENSMUSG00000030595;ENSMUSG00000000776;ENSMUSG00000020115;ENSMUSG00000028163;ENSMUSG00000034453;ENSMUSG00000021025;ENSMUSG00000049734;ENSMUSG00000004221;ENSMUSG00000025498	Zbp1;Cxcl10;Ikbke;Il33;Adar;Ddx58;Nfkbib;Polr3d;Tbk1;Nfkb1;Polr3b;Nfkbia;Trex1;Ikbkg;Irf7
ko03320	PPAR signaling pathway	67	-0.428037	-1.41637	0.0526316	0.143359	2178	ENSMUSG00000031808;ENSMUSG00000028715;ENSMUSG00000066071;ENSMUSG00000027359;ENSMUSG00000018796;ENSMUSG00000030382;ENSMUSG00000078597;ENSMUSG00000032081;ENSMUSG00000017754;ENSMUSG00000024981;ENSMUSG00000032418;ENSMUSG00000022853;ENSMUSG00000022091;ENSMUSG00000026170;ENSMUSG00000005681;ENSMUSG00000024665;ENSMUSG00000037071;ENSMUSG00000054422;ENSMUSG00000028240;ENSMUSG00000010651	Slc27a1;Cyp4a14;Cyp4a12a;Slc27a2;Acsl1;Slc27a5;Cyp4a12b;Apoc3;Pltp;Acsl5;Me1;Ehhadh;Sorbs3;Cyp27a1;Apoa2;Fads2;Scd1;Fabp1;Cyp7a1;Acaa1b
ko00532	Glycosaminoglycan biosynthesis - chondroitin sulfate / dermatan sulfate	14	0.632175	1.48553	0.0527523	0.143359	2604	ENSMUSG00000032997;ENSMUSG00000058152;ENSMUSG00000042042;ENSMUSG00000038181;ENSMUSG00000071649;ENSMUSG00000050796;ENSMUSG00000056643	Chpf;Chsy3;Csgalnact2;Chpf2;B3gat3;B3galt6;Chst13
ko00062	Fatty acid elongation	28	-0.53745	-1.47549	0.0529301	0.143359	2428	ENSMUSG00000021226;ENSMUSG00000036880;ENSMUSG00000021364;ENSMUSG00000027984;ENSMUSG00000052392;ENSMUSG00000028937;ENSMUSG00000031708;ENSMUSG00000032349;ENSMUSG00000041220;ENSMUSG00000072949;ENSMUSG00000038754;ENSMUSG00000021228	Acot2;Acaa2;Elovl2;Hadh;Acot4;Acot7;Tecr;Elovl5;Elovl6;Acot1;Elovl3;Acot3
ko00513	Various types of N-glycan biosynthesis	40	0.48866	1.43404	0.0550847	0.147537	2854	ENSMUSG00000028413;ENSMUSG00000030062;ENSMUSG00000035845;ENSMUSG00000032116;ENSMUSG00000032437;ENSMUSG00000028757;ENSMUSG00000021065;ENSMUSG00000027642;ENSMUSG00000024085;ENSMUSG00000032059;ENSMUSG00000035671;ENSMUSG00000022174;ENSMUSG00000036646;ENSMUSG00000039740;ENSMUSG00000043998;ENSMUSG00000008763;ENSMUSG00000028538;ENSMUSG00000033809;ENSMUSG00000118664;ENSMUSG00000031286	B4galt1;Rpn1;Alg12;Stt3a;Stt3b;Ddost;Fut8;Rpn2;Man2a1;Alg9;Zswim4;Dad1;Man1b1;Alg2;Mgat2;Man1a2;St3gal3;Alg3;TUSC3;Glt28d2
ko04640	Hematopoietic cell lineage	47	0.463661	1.42518	0.056338	0.149235	1801	ENSMUSG00000051439;ENSMUSG00000015533;ENSMUSG00000030786;ENSMUSG00000027009;ENSMUSG00000026072;ENSMUSG00000002944;ENSMUSG00000025014;ENSMUSG00000015947;ENSMUSG00000020689;ENSMUSG00000014599;ENSMUSG00000022847;ENSMUSG00000027111;ENSMUSG00000029084;ENSMUSG00000030342;ENSMUSG00000022797;ENSMUSG00000005087;ENSMUSG00000030748;ENSMUSG00000001507	Cd14;Itga2;Itgam;Itga4;Il1r1;Cd36;Dntt;Fcgr1;Itgb3;Csf1;Thpo;Itga6;Cd38;Cd9;Tfrc;Cd44;Il4ra;Itga3
ko04927	Cortisol synthesis and secretion	42	-0.469174	-1.41608	0.0601504	0.157602	1484	ENSMUSG00000040061;ENSMUSG00000022994;ENSMUSG00000042644;ENSMUSG00000031574;ENSMUSG00000022220;ENSMUSG00000022840;ENSMUSG00000062410;ENSMUSG00000063730;ENSMUSG00000038092	Plcb2;Adcy6;Itpr3;Star;Adcy4;Adcy5;Hsd3b3;Hsd3b2;Hsd3b5
ko04724	Glutamatergic synapse	54	-0.436342	-1.39269	0.0609982	0.158105	1484	ENSMUSG00000040061;ENSMUSG00000022994;ENSMUSG00000010064;ENSMUSG00000042644;ENSMUSG00000027669;ENSMUSG00000022220;ENSMUSG00000037541;ENSMUSG00000032766;ENSMUSG00000025813;ENSMUSG00000044005;ENSMUSG00000022840;ENSMUSG00000022623;ENSMUSG00000003279;ENSMUSG00000026473;ENSMUSG00000019935	Plcb2;Adcy6;Slc38a3;Itpr3;Gnb4;Adcy4;Shank2;Gng11;Homer2;Gls2;Adcy5;Shank3;Dlgap1;Glul;Slc17a8
ko00860	Porphyrin and chlorophyll metabolism	40	-0.476184	-1.41867	0.0641509	0.163046	1762	ENSMUSG00000054545;ENSMUSG00000028393;ENSMUSG00000090124;ENSMUSG00000029260;ENSMUSG00000025270;ENSMUSG00000061906;ENSMUSG00000090165;ENSMUSG00000054630;ENSMUSG00000057425;ENSMUSG00000090175;ENSMUSG00000089943;ENSMUSG00000089960;ENSMUSG00000070704;ENSMUSG00000035780;ENSMUSG00000090171;ENSMUSG00000035836	Ugt1a6a;Alad;Ugt1a7c;Ugt2b34;Alas2;Ugt2b38;Ugt1a10;Ugt2b5;Ugt2b37;Ugt1a9;Ugt1a5;Ugt1a1;Ugt2b36;Ugt2a3;Ugt1a2;Ugt2b1
ko04625	C-type lectin receptor signaling pathway	71	0.413089	1.36545	0.064257	0.163046	2689	ENSMUSG00000002983;ENSMUSG00000042349;ENSMUSG00000025225;ENSMUSG00000020941;ENSMUSG00000053175;ENSMUSG00000052684;ENSMUSG00000002325;ENSMUSG00000030102;ENSMUSG00000028698;ENSMUSG00000040033;ENSMUSG00000028163;ENSMUSG00000028191;ENSMUSG00000028680;ENSMUSG00000027852;ENSMUSG00000018899;ENSMUSG00000053436;ENSMUSG00000021025;ENSMUSG00000026104;ENSMUSG00000016528;ENSMUSG00000004221;ENSMUSG00000043733;…	Relb;Ikbke;Nfkb2;Map3k14;Bcl3;Jun;Irf9;Itpr1;Pik3r3;Stat2;Nfkb1;Bcl10;Plk3;Nras;Irf1;Mapk14;Nfkbia;Stat1;Mapkapk2;Ikbkg;Ptpn11;Kras;Ppp3cc;Arhgef12;Calm1
ko01230	Biosynthesis of amino acids	68	-0.412993	-1.36534	0.0722656	0.181456	1753	ENSMUSG00000060600;ENSMUSG00000025742;ENSMUSG00000027406;ENSMUSG00000025403;ENSMUSG00000059040;ENSMUSG00000057666;ENSMUSG00000063524;ENSMUSG00000033065;ENSMUSG00000021957;ENSMUSG00000020534;ENSMUSG00000053604;ENSMUSG00000026473;ENSMUSG00000017390;ENSMUSG00000028179;ENSMUSG00000031173;ENSMUSG00000023262;ENSMUSG00000076441;ENSMUSG00000022546;ENSMUSG00000097148;ENSMUSG00000041237;ENSMUSG00000020051	Eno3;Prps2;Idh3b;Shmt2;Eno1b;Gapdh;Eno1;Pfkm;Tkt;Shmt1;Rpia;Glul;Aldoc;Cth;Otc;Acy1;Ass1;Gpt;Gm3839;Pklr;Pah
ko00920	Sulfur metabolism	11	-0.66577	-1.49162	0.0736842	0.183111	1584	ENSMUSG00000071711;ENSMUSG00000005803;ENSMUSG00000068874;ENSMUSG00000064254;ENSMUSG00000068877;ENSMUSG00000024899	Mpst;Sqor;Selenbp1;Ethe1;Selenbp2;Papss2
ko00640	Propanoate metabolism	34	-0.499273	-1.43915	0.0756144	0.18599	3553	ENSMUSG00000029098;ENSMUSG00000041426;ENSMUSG00000000340;ENSMUSG00000052738;ENSMUSG00000057880;ENSMUSG00000029545;ENSMUSG00000062480;ENSMUSG00000021238;ENSMUSG00000023832;ENSMUSG00000025465;ENSMUSG00000060376;ENSMUSG00000041650;ENSMUSG00000019883;ENSMUSG00000042010;ENSMUSG00000022853;ENSMUSG00000033429;ENSMUSG00000020532;ENSMUSG00000030246;ENSMUSG00000027605;ENSMUSG00000035948	Acox3;Hibch;Dbt;Suclg1;Abat;Acads;Acat3;Aldh6a1;Acat2;Echs1;Bckdha;Pcca;Echdc1;Acacb;Ehhadh;Mcee;Acaca;Ldhb;Acss2;Acss3
ko04660	T cell receptor signaling pathway	67	0.412145	1.34246	0.0777096	0.18759	2760	ENSMUSG00000026012;ENSMUSG00000023947;ENSMUSG00000020941;ENSMUSG00000052684;ENSMUSG00000024235;ENSMUSG00000034116;ENSMUSG00000032475;ENSMUSG00000030595;ENSMUSG00000028698;ENSMUSG00000028163;ENSMUSG00000028191;ENSMUSG00000027852;ENSMUSG00000024122;ENSMUSG00000004266;ENSMUSG00000053436;ENSMUSG00000021025;ENSMUSG00000002699;ENSMUSG00000004221;ENSMUSG00000030265;ENSMUSG00000022092;ENSMUSG00000059923;…	Cd28;Nfkbie;Map3k14;Jun;Map3k8;Vav1;Nck1;Nfkbib;Pik3r3;Nfkb1;Bcl10;Nras;Pdpk1;Ptpn6;Mapk14;Nfkbia;Lcp2;Ikbkg;Kras;Ppp3cc;Grb2;Pak4
ko00650	Butanoate metabolism	25	-0.531655	-1.41389	0.077821	0.18759	2983	ENSMUSG00000022186;ENSMUSG00000029545;ENSMUSG00000062480;ENSMUSG00000023832;ENSMUSG00000025465;ENSMUSG00000035936;ENSMUSG00000033533;ENSMUSG00000030945;ENSMUSG00000046598;ENSMUSG00000020988;ENSMUSG00000027984;ENSMUSG00000022853;ENSMUSG00000029482;ENSMUSG00000030972;ENSMUSG00000028167	Oxct1;Acads;Acat3;Acat2;Echs1;Aldh5a1;Acsm1;Acsm2;Bdh1;L2hgdh;Hadh;Ehhadh;Aacs;Acsm5;Bdh2
ko01210	2-Oxocarboxylic acid metabolism	16	-0.602339	-1.45709	0.0815217	0.194565	2884	ENSMUSG00000002010;ENSMUSG00000057228;ENSMUSG00000025950;ENSMUSG00000005683;ENSMUSG00000030826;ENSMUSG00000030541;ENSMUSG00000028405;ENSMUSG00000027406;ENSMUSG00000023262;ENSMUSG00000022546	Idh3g;Aadat;Idh1;Cs;Bcat2;Idh2;Aco1;Idh3b;Acy1;Gpt
ko05202	Transcriptional misregulation in cancer	121	0.361766	1.29209	0.0828157	0.195715	1661	ENSMUSG00000051439;ENSMUSG00000023067;ENSMUSG00000021453;ENSMUSG00000030786;ENSMUSG00000022952;ENSMUSG00000015312;ENSMUSG00000017737;ENSMUSG00000026435;ENSMUSG00000035356;ENSMUSG00000015947;ENSMUSG00000022346;ENSMUSG00000066687;ENSMUSG00000057367;ENSMUSG00000032000;ENSMUSG00000000385;ENSMUSG00000022901;ENSMUSG00000020275;ENSMUSG00000035158;ENSMUSG00000021065;ENSMUSG00000030199;ENSMUSG00000038718;…	Cd14;Cdkn1a;Gadd45g;Itgam;Runx1;Gadd45b;Mmp9;Slc45a3;Nfkbiz;Fcgr1;Myc;Zbtb16;Birc2;Birc3;Tmprss2;Cd86;Rel;Mitf;Fut8;Etv6;Pbx3;Tfe3;Spi1;Nfkb1;Kdm6a
ko00250	Alanine, aspartate and glutamate metabolism	29	-0.501588	-1.39166	0.0847458	0.198332	1137	ENSMUSG00000029246;ENSMUSG00000026272;ENSMUSG00000044005;ENSMUSG00000028737;ENSMUSG00000026473;ENSMUSG00000022751;ENSMUSG00000076441;ENSMUSG00000022546;ENSMUSG00000011148	Ppat;Agxt;Gls2;Aldh4a1;Glul;Nit2;Ass1;Gpt;Adssl1
ko05220	Chronic myeloid leukemia	67	0.404196	1.31656	0.0858896	0.199076	559	ENSMUSG00000023067;ENSMUSG00000021453;ENSMUSG00000022952;ENSMUSG00000015312;ENSMUSG00000022346	Cdkn1a;Gadd45g;Runx1;Gadd45b;Myc
ko04933	AGE-RAGE signaling pathway in diabetic complications	75	0.395095	1.31578	0.0879346	0.201875	634	ENSMUSG00000037411;ENSMUSG00000035385;ENSMUSG00000037405;ENSMUSG00000031502;ENSMUSG00000038418;ENSMUSG00000015340;ENSMUSG00000026193;ENSMUSG00000004040;ENSMUSG00000031503;ENSMUSG00000052684	Serpine1;Ccl2;Icam1;Col4a1;Egr1;Cybb;Fn1;Stat3;Col4a2;Jun
ko05216	Thyroid cancer	34	0.475956	1.35352	0.0887949	0.201927	1116	ENSMUSG00000023067;ENSMUSG00000021453;ENSMUSG00000015312;ENSMUSG00000022346;ENSMUSG00000058126;ENSMUSG00000027940	Cdkn1a;Gadd45g;Gadd45b;Myc;Tpm3-rs7;Tpm3
ko00561	Glycerolipid metabolism	45	-0.441949	-1.33759	0.0916179	0.206399	2253	ENSMUSG00000040479;ENSMUSG00000033174;ENSMUSG00000035561;ENSMUSG00000004815;ENSMUSG00000029455;ENSMUSG00000024978;ENSMUSG00000024052;ENSMUSG00000034371;ENSMUSG00000053644;ENSMUSG00000020593;ENSMUSG00000024424;ENSMUSG00000053846;ENSMUSG00000010025;ENSMUSG00000046338;ENSMUSG00000032207	Dgkz;Mgll;Aldh1b1;Dgkq;Aldh2;Gpam;Lpin2;Tkfc;Aldh7a1;Lpin1;Ttc39c;Lipg;Aldh3a2;Gpat2;Lipc
ko05144	Malaria	27	0.505771	1.38202	0.100209	0.223663	686	ENSMUSG00000027995;ENSMUSG00000035385;ENSMUSG00000037405;ENSMUSG00000002944;ENSMUSG00000000290;ENSMUSG00000032508	Tlr2;Ccl2;Icam1;Cd36;Itgb2;Myd88
ko04670	Leukocyte transendothelial migration	73	0.389963	1.29571	0.10142	0.224289	2492	ENSMUSG00000030786;ENSMUSG00000037405;ENSMUSG00000027009;ENSMUSG00000017737;ENSMUSG00000047109;ENSMUSG00000015340;ENSMUSG00000000290;ENSMUSG00000047230;ENSMUSG00000068036;ENSMUSG00000052397;ENSMUSG00000015950;ENSMUSG00000034116;ENSMUSG00000033220;ENSMUSG00000028698;ENSMUSG00000030830;ENSMUSG00000026480;ENSMUSG00000054808;ENSMUSG00000038235;ENSMUSG00000053436;ENSMUSG00000058230;ENSMUSG00000022607;…	Itgam;Icam1;Itga4;Mmp9;Cldn14;Cybb;Itgb2;Cldn2;Afdn;Ezr;Ncf1;Vav1;Rac2;Pik3r3;Itgal;Ncf2;Actn4;F11r;Mapk14;Arhgap35;Ptk2;Vcam1;Cyba;Ctnnd1;Ptpn11;Gnai1
ko05206	MicroRNAs in cancer	124	0.353348	1.2659	0.10352	0.226852	1774	ENSMUSG00000022510;ENSMUSG00000023067;ENSMUSG00000038037;ENSMUSG00000005413;ENSMUSG00000017737;ENSMUSG00000038894;ENSMUSG00000026435;ENSMUSG00000027478;ENSMUSG00000004040;ENSMUSG00000020689;ENSMUSG00000022346;ENSMUSG00000020108;ENSMUSG00000064225;ENSMUSG00000052397;ENSMUSG00000017146;ENSMUSG00000048915;ENSMUSG00000027954;ENSMUSG00000032366;ENSMUSG00000028698;ENSMUSG00000024014;ENSMUSG00000028970;…	Trp63;Cdkn1a;Socs1;Hmox1;Mmp9;Irs2;Slc45a3;Dnmt3b;Stat3;Itgb3;Myc;Ddit4;Paqr9;Ezr;Brca1;Efna5;Efna1;Tpm1;Pik3r3;Pim1;Abcb1b;Cdc25a;Cd44;Nfkb1;Shc1;Egfr;Nras
ko04215	Apoptosis - multiple species	28	0.495282	1.36291	0.105708	0.229561	973	Mus_musculus_newGene_2170;ENSMUSG00000019979;ENSMUSG00000057367;ENSMUSG00000032000;ENSMUSG00000030341	Mus_musculus_newGene_2170;Apaf1;Birc2;Birc3;Tnfrsf1a
ko04270	Vascular smooth muscle contraction	85	-0.372152	-1.28073	0.107422	0.231199	1558	ENSMUSG00000078597;ENSMUSG00000031659;ENSMUSG00000040061;ENSMUSG00000033910;ENSMUSG00000022994;ENSMUSG00000042644;ENSMUSG00000028005;ENSMUSG00000022220;ENSMUSG00000028469;ENSMUSG00000022840;ENSMUSG00000059588;ENSMUSG00000027931;ENSMUSG00000018830;ENSMUSG00000001240;ENSMUSG00000067818;ENSMUSG00000035783	Cyp4a12b;Adcy7;Plcb2;Gucy1a1;Adcy6;Itpr3;Gucy1b1;Adcy4;Npr2;Adcy5;Calcrl;Npr1;Myh11;Ramp2;Myl9;Acta2
ko05223	Non-small cell lung cancer	61	0.402896	1.28309	0.109442	0.231614	931	ENSMUSG00000023067;ENSMUSG00000021453;ENSMUSG00000015312;ENSMUSG00000031805;ENSMUSG00000004040;ENSMUSG00000029999;ENSMUSG00000060579	Cdkn1a;Gadd45g;Gadd45b;Jak3;Stat3;Tgfa;Fhit
ko05100	Bacterial invasion of epithelial cells	56	0.414154	1.3004	0.110403	0.231614	2078	ENSMUSG00000116048;ENSMUSG00000058013;ENSMUSG00000026193;ENSMUSG00000036885;ENSMUSG00000047126;ENSMUSG00000058325;ENSMUSG00000028698;ENSMUSG00000047547;ENSMUSG00000061665;ENSMUSG00000000058;ENSMUSG00000042626;ENSMUSG00000029003;ENSMUSG00000041112;ENSMUSG00000029622;ENSMUSG00000022607	Septin2;Septin11;Fn1;Arhgef26;Cltc;Dock1;Pik3r3;Cltb;Cd2ap;Cav2;Shc1;Mad2l2;Elmo1;Arpc1b;Ptk2
ko04742	Taste transduction	20	-0.536168	-1.37524	0.110497	0.231614	1381	ENSMUSG00000040061;ENSMUSG00000022994;ENSMUSG00000042644;ENSMUSG00000022220;ENSMUSG00000024462;ENSMUSG00000027765;ENSMUSG00000030340;ENSMUSG00000023243	Plcb2;Adcy6;Itpr3;Adcy4;Gabbr1;P2ry1;Scnn1a;Kcnk5
ko00230	Purine metabolism	108	-0.347088	-1.23318	0.117647	0.244475	1671	ENSMUSG00000036813;ENSMUSG00000030653;ENSMUSG00000025742;ENSMUSG00000031659;ENSMUSG00000029247;ENSMUSG00000033910;ENSMUSG00000022994;ENSMUSG00000028005;ENSMUSG00000022220;ENSMUSG00000029246;ENSMUSG00000028469;ENSMUSG00000024177;ENSMUSG00000028792;ENSMUSG00000022840;ENSMUSG00000073435;ENSMUSG00000027931;ENSMUSG00000028527;ENSMUSG00000032177;ENSMUSG00000031842;ENSMUSG00000024899;ENSMUSG00000011148;…	Entpd8;Gm45837;Prps2;Adcy7;Paics;Gucy1a1;Adcy6;Gucy1b1;Adcy4;Ppat;Npr2;Nme4;Ak2;Adcy5;Nme3;Npr1;Ak4;Pde4a;Pde4c;Papss2;Adssl1;Rrm2;Pklr;Uox;Pde6c
ko00620	Pyruvate metabolism	39	-0.44689	-1.32453	0.121951	0.251024	3013	ENSMUSG00000040618;ENSMUSG00000062480;ENSMUSG00000020321;ENSMUSG00000023832;ENSMUSG00000024026;ENSMUSG00000021620;ENSMUSG00000024158;ENSMUSG00000035561;Mus_musculus_newGene_9;ENSMUSG00000021748;ENSMUSG00000000168;ENSMUSG00000029455;ENSMUSG00000042010;ENSMUSG00000032418;ENSMUSG00000053644;ENSMUSG00000020532;ENSMUSG00000030246;ENSMUSG00000041237;ENSMUSG00000010025;ENSMUSG00000027605	Pck2;Acat3;Mdh1;Acat2;Glo1;Acot12;Hagh;Aldh1b1;Mus_musculus_newGene_9;Pdhb;Dlat;Aldh2;Acacb;Me1;Aldh7a1;Acaca;Ldhb;Pklr;Aldh3a2;Acss2
ko05410	Hypertrophic cardiomyopathy	40	0.438078	1.2856	0.122881	0.251024	1167	ENSMUSG00000015533;ENSMUSG00000027009;ENSMUSG00000020689;ENSMUSG00000029467;ENSMUSG00000058126;ENSMUSG00000025348;ENSMUSG00000032366;ENSMUSG00000027940;ENSMUSG00000027111	Itga2;Itga4;Itgb3;Atp2a2;Tpm3-rs7;Itga7;Tpm1;Tpm3;Itga6
ko05210	Colorectal cancer	72	0.382426	1.26245	0.12831	0.259911	1305	ENSMUSG00000023067;ENSMUSG00000021453;ENSMUSG00000015312;ENSMUSG00000022346;ENSMUSG00000052684;ENSMUSG00000029999;ENSMUSG00000040760;ENSMUSG00000033220;ENSMUSG00000028698	Cdkn1a;Gadd45g;Gadd45b;Myc;Jun;Tgfa;Appl1;Rac2;Pik3r3
ko04978	Mineral absorption	28	0.466764	1.28443	0.131078	0.261636	1912	ENSMUSG00000031762;ENSMUSG00000005413;ENSMUSG00000023030;ENSMUSG00000033792;ENSMUSG00000032554;ENSMUSG00000030302;ENSMUSG00000011034;ENSMUSG00000019943	Mt2;Hmox1;Slc11a2;Atp7a;Trf;Atp2b2;Slc5a1;Atp2b1
ko04727	GABAergic synapse	41	-0.436965	-1.30814	0.131332	0.261636	1484	ENSMUSG00000031659;ENSMUSG00000022994;ENSMUSG00000030108;ENSMUSG00000010064;ENSMUSG00000027669;ENSMUSG00000022220;ENSMUSG00000032766;ENSMUSG00000044005;ENSMUSG00000022840;ENSMUSG00000024462;ENSMUSG00000026473;ENSMUSG00000017740	Adcy7;Adcy6;Slc6a13;Slc38a3;Gnb4;Adcy4;Gng11;Gls2;Adcy5;Gabbr1;Glul;Slc12a5
ko05034	Alcoholism	70	-0.375887	-1.24493	0.132812	0.262416	1297	ENSMUSG00000027669;ENSMUSG00000008855;ENSMUSG00000023942;ENSMUSG00000032766;ENSMUSG00000022475;ENSMUSG00000022840;ENSMUSG00000048482;ENSMUSG00000034245;ENSMUSG00000040147;ENSMUSG00000024891;ENSMUSG00000061718	Gnb4;Hdac5;Slc29a1;Gng11;Hdac7;Adcy5;Bdnf;Hdac11;Maob;Slc29a2;Ppp1r1b
ko05221	Acute myeloid leukemia	58	0.400171	1.26254	0.137045	0.268578	627	ENSMUSG00000051439;ENSMUSG00000030786;ENSMUSG00000022952;ENSMUSG00000015947;ENSMUSG00000004040;ENSMUSG00000022346;ENSMUSG00000066687	Cd14;Itgam;Runx1;Fcgr1;Stat3;Myc;Zbtb16
ko04330	Notch signaling pathway	51	-0.405116	-1.26414	0.148496	0.286439	2639	ENSMUSG00000071226;ENSMUSG00000027314;ENSMUSG00000029071;ENSMUSG00000032064;ENSMUSG00000008305;ENSMUSG00000029070;ENSMUSG00000053040;ENSMUSG00000027276;ENSMUSG00000020888;ENSMUSG00000054452;ENSMUSG00000026923;ENSMUSG00000022528;ENSMUSG00000015468;ENSMUSG00000038146;ENSMUSG00000034758;ENSMUSG00000034771;ENSMUSG00000014773	Cecr2;Dll4;Dvl1;Dixdc1;Tle1;Mxra8;Aph1c;Jag1;Dvl2;Tle5;Notch1;Hes1;Notch4;Notch3;Tle6;Tle2;Dll1
ko04066	HIF-1 signaling pathway	82	0.365514	1.22829	0.148536	0.286439	1729	ENSMUSG00000020826;ENSMUSG00000023067;ENSMUSG00000037411;ENSMUSG00000005413;ENSMUSG00000015340;ENSMUSG00000004040;ENSMUSG00000063229;ENSMUSG00000022965;ENSMUSG00000032554;ENSMUSG00000021109;ENSMUSG00000028698;ENSMUSG00000022797;ENSMUSG00000057897;ENSMUSG00000028163;ENSMUSG00000020122	Nos2;Cdkn1a;Serpine1;Hmox1;Cybb;Stat3;Ldha;Ifngr2;Trf;Hif1a;Pik3r3;Tfrc;Camk2b;Nfkb1;Egfr
ko04934	Cushing syndrome	104	-0.335654	-1.19152	0.150391	0.287715	2510	ENSMUSG00000028212;ENSMUSG00000048154;ENSMUSG00000024985;ENSMUSG00000029071;ENSMUSG00000000142;ENSMUSG00000028551;ENSMUSG00000002068;ENSMUSG00000025358;ENSMUSG00000029070;ENSMUSG00000045005;ENSMUSG00000031659;ENSMUSG00000020888;ENSMUSG00000018983;ENSMUSG00000040061;ENSMUSG00000022994;ENSMUSG00000042644;ENSMUSG00000018486;ENSMUSG00000000782;ENSMUSG00000031574;ENSMUSG00000027490;ENSMUSG00000022220;…	Ccne2;Kmt2d;Tcf7l2;Dvl1;Axin2;Cdkn2c;Ccne1;Cdk2;Mxra8;Fzd5;Adcy7;Dvl2;E2f2;Plcb2;Adcy6;Itpr3;Wnt9b;Tcf7;Star;E2f1;Adcy4;Fzd4;Adcy5;Fzd7;Fzd8;Ccnd1;Hsd3b3;Hsd3b2;Hsd3b5
ko00030	Pentose phosphate pathway	29	-0.464923	-1.28993	0.152542	0.289533	3223	ENSMUSG00000025791;ENSMUSG00000030695;ENSMUSG00000025503;ENSMUSG00000028307;ENSMUSG00000031400;ENSMUSG00000025742;ENSMUSG00000030225;ENSMUSG00000036427;ENSMUSG00000033065;ENSMUSG00000021957;ENSMUSG00000053604;ENSMUSG00000017390;ENSMUSG00000023070	Pgm1;Aldoa;Taldo1;Aldob;G6pdx;Prps2;Dera;Gpi1;Pfkm;Tkt;Rpia;Aldoc;Rgn
ko03050	Proteasome	46	0.406234	1.24077	0.159836	0.301007	5255	ENSMUSG00000028555;ENSMUSG00000030591;ENSMUSG00000040850;ENSMUSG00000024338;ENSMUSG00000025487;ENSMUSG00000006998;ENSMUSG00000026914;ENSMUSG00000026229;ENSMUSG00000039067;ENSMUSG00000078652;ENSMUSG00000031897;ENSMUSG00000030603;ENSMUSG00000005779;ENSMUSG00000028932;ENSMUSG00000030751;ENSMUSG00000002102;ENSMUSG00000017221;ENSMUSG00000068749;ENSMUSG00000021832;ENSMUSG00000021024;ENSMUSG00000020708;…	Ttc39a;Psmd8;Psme4;Psmb8;Psmd13;Psmd2;Psmd14;Psmd1;Psmd7;Psme3;Psmb10;Psmc4;Psmb4;Psmc2;Psma1;Psmc3;Psmd3;Psma5;Psmc6;Psma6;Psmc5;Psme2b;Psmd12;Psmd11;Psmb5;Psmb2;Psmd4;Psma4;Psmc1;Psmb9;Psmb6;Psme2;Psma7
ko04015	Rap1 signaling pathway	139	-0.312366	-1.16416	0.163534	0.304926	2089	ENSMUSG00000041351;ENSMUSG00000024620;ENSMUSG00000019966;ENSMUSG00000000303;ENSMUSG00000016933;ENSMUSG00000024070;ENSMUSG00000031659;ENSMUSG00000040061;ENSMUSG00000022469;ENSMUSG00000020357;ENSMUSG00000022994;ENSMUSG00000023951;ENSMUSG00000006386;ENSMUSG00000025856;ENSMUSG00000032470;ENSMUSG00000037225;ENSMUSG00000022220;ENSMUSG00000032946;ENSMUSG00000031955;ENSMUSG00000056917;ENSMUSG00000062960;…	Rap1gap;Pdgfrb;Kitl;Cdh1;Plcg1;Prkd3;Adcy7;Plcb2;Rapgef3;Flt4;Adcy6;Vegfa;Tek;Pdgfa;Mras;Fgf2;Adcy4;Rasgrp2;Bcar1;Sipa1;Kdr;Id1;Adcy5;Kit;Arap3;Mapk12;Sipa1l2;Fgfr3;P2ry1;Vegfb;Rasgrp3;Klk1b4;Lpar2;Map2k6
ko04721	Synaptic vesicle cycle	45	0.408337	1.24055	0.165644	0.304926	1942	ENSMUSG00000038600;Mus_musculus_newGene_1096;ENSMUSG00000028456;ENSMUSG00000047126;ENSMUSG00000036330;ENSMUSG00000047547;ENSMUSG00000030806;ENSMUSG00000034187;ENSMUSG00000015575;ENSMUSG00000035152;ENSMUSG00000002957;ENSMUSG00000052459;ENSMUSG00000038023	Atp6v0a4;Mus_musculus_newGene_1096;Unc13b;Cltc;Slc18a1;Cltb;Stx1b;Nsf;Atp6v0e;Ap2b1;Ap2a2;Atp6v1a;Atp6v0a2
ko04710	Circadian rhythm	25	-0.476396	-1.26693	0.167315	0.304926	1159	ENSMUSG00000068742;ENSMUSG00000028150;ENSMUSG00000055866;ENSMUSG00000030103;ENSMUSG00000020889;ENSMUSG00000030256;ENSMUSG00000028957	Cry2;Rorc;Per2;Bhlhe40;Nr1d1;Bhlhe41;Per3
ko00350	Tyrosine metabolism	29	-0.455036	-1.2625	0.167608	0.304926	1238	ENSMUSG00000055301;ENSMUSG00000045316;ENSMUSG00000063558;ENSMUSG00000037797;ENSMUSG00000030630;ENSMUSG00000000326;ENSMUSG00000078651;ENSMUSG00000033307;ENSMUSG00000027371;ENSMUSG00000022821;ENSMUSG00000029445;ENSMUSG00000020672;ENSMUSG00000040147;ENSMUSG00000022129;ENSMUSG00000074207;ENSMUSG00000064294	Adh7;Fahd1;Aox1;Adh4;Fah;Comt;Aoc2;Mif;Fahd2a;Hgd;Hpd;Sntg2;Maob;Dct;Adh1;Aox3
ko00500	Starch and sucrose metabolism	28	-0.466149	-1.27975	0.168242	0.304926	1487	ENSMUSG00000036427;ENSMUSG00000022707;ENSMUSG00000078650;ENSMUSG00000030729;ENSMUSG00000021069;ENSMUSG00000001891;ENSMUSG00000030244;ENSMUSG00000041798	Gpi1;Gbe1;G6pc;Pgm2l1;Pygl;Ugp2;Gys2;Gck
ko05230	Central carbon metabolism in cancer	56	-0.384965	-1.23254	0.171375	0.308286	2218	ENSMUSG00000030849;ENSMUSG00000024620;ENSMUSG00000021748;ENSMUSG00000025486;ENSMUSG00000033065;ENSMUSG00000044005;ENSMUSG00000005672;ENSMUSG00000006494;ENSMUSG00000030246;ENSMUSG00000054252;ENSMUSG00000041798;ENSMUSG00000027690	Fgfr2;Pdgfrb;Pdhb;Sirt3;Pfkm;Gls2;Kit;Pdk1;Ldhb;Fgfr3;Gck;Slc2a2
ko05167	Kaposi sarcoma-associated herpesvirus infection	149	0.319284	1.17057	0.174468	0.309235	1955	ENSMUSG00000023067;ENSMUSG00000029380;Mus_musculus_newGene_2170;ENSMUSG00000037405;ENSMUSG00000058427;ENSMUSG00000042349;ENSMUSG00000024164;ENSMUSG00000024778;ENSMUSG00000004040;ENSMUSG00000020901;ENSMUSG00000022346;ENSMUSG00000003283;ENSMUSG00000052684;ENSMUSG00000022951;ENSMUSG00000024079;ENSMUSG00000021277;ENSMUSG00000022901;ENSMUSG00000021756;ENSMUSG00000030341;ENSMUSG00000021109;ENSMUSG00000…	Cdkn1a;Cxcl1;Mus_musculus_newGene_2170;Icam1;Cxcl2;Ikbke;C3;Fas;Stat3;Pik3r5;Myc;Hck;Jun;Rcan1;Eif2ak2;Traf3;Cd86;Il6st;Tnfrsf1a;Hif1a;Tlr3;Irf9;Itpr1;Pik3r3;Tbk1;Stat2;Ticam1;Nfkb1;Gabarap;Ifnar1;Nras;H2-D1;Mapk14;Nfkbia
ko05213	Endometrial cancer	51	0.394296	1.2145	0.174468	0.309235	559	ENSMUSG00000023067;ENSMUSG00000021453;ENSMUSG00000015312;ENSMUSG00000022346	Cdkn1a;Gadd45g;Gadd45b;Myc
ko05212	Pancreatic cancer	67	0.369478	1.20348	0.179959	0.31664	1305	ENSMUSG00000023067;ENSMUSG00000021453;ENSMUSG00000027695;ENSMUSG00000015312;ENSMUSG00000004040;ENSMUSG00000029999;ENSMUSG00000033220;ENSMUSG00000028698	Cdkn1a;Gadd45g;Pld1;Gadd45b;Stat3;Tgfa;Rac2;Pik3r3
ko04916	Melanogenesis	66	-0.363521	-1.19789	0.181287	0.316664	2358	ENSMUSG00000029071;ENSMUSG00000027438;ENSMUSG00000019966;ENSMUSG00000029070;ENSMUSG00000045005;ENSMUSG00000031659;ENSMUSG00000020888;ENSMUSG00000040061;ENSMUSG00000022994;ENSMUSG00000018486;ENSMUSG00000000782;ENSMUSG00000022220;ENSMUSG00000022122;ENSMUSG00000049791;ENSMUSG00000022840;ENSMUSG00000005672;ENSMUSG00000041075;ENSMUSG00000036904;ENSMUSG00000022129	Dvl1;Napb;Kitl;Mxra8;Fzd5;Adcy7;Dvl2;Plcb2;Adcy6;Wnt9b;Tcf7;Adcy4;Ednrb;Fzd4;Adcy5;Kit;Fzd7;Fzd8;Dct
ko04340	Hedgehog signaling pathway	38	-0.414637	-1.22995	0.182994	0.317347	872	ENSMUSG00000070348;ENSMUSG00000029122;ENSMUSG00000052957;ENSMUSG00000006538	Ccnd1;Evc;Gas1;Ihh
ko00330	Arginine and proline metabolism	43	-0.408818	-1.24222	0.184411	0.317519	1691	ENSMUSG00000029455;ENSMUSG00000040706;ENSMUSG00000027199;ENSMUSG00000019718;ENSMUSG00000053644;ENSMUSG00000028737;ENSMUSG00000030934;ENSMUSG00000040147;ENSMUSG00000036892;ENSMUSG00000003526;ENSMUSG00000075289;ENSMUSG00000010025;ENSMUSG00000028789;ENSMUSG00000020150	Aldh2;Agmat;Gatm;L3hypdh;Aldh7a1;Aldh4a1;Oat;Maob;Prodh2;Prodh;Carns1;Aldh3a2;Azin2;Gamt
ko04216	Ferroptosis	36	0.420879	1.20687	0.194861	0.329882	390	ENSMUSG00000003617;ENSMUSG00000005413;ENSMUSG00000023030;ENSMUSG00000022094;ENSMUSG00000015340	Cp;Hmox1;Slc11a2;Slc39a14;Cybb
ko04960	Aldosterone-regulated sodium reabsorption	22	-0.479554	-1.24274	0.195076	0.329882	633	ENSMUSG00000026576;ENSMUSG00000030340;ENSMUSG00000002504	Atp1b1;Scnn1a;Slc9a3r2
ko04650	Natural killer cell mediated cytotoxicity	63	0.372657	1.19289	0.195789	0.329882	2050	Mus_musculus_newGene_2170;ENSMUSG00000037405;ENSMUSG00000024778;ENSMUSG00000059089;ENSMUSG00000000290;ENSMUSG00000034116;ENSMUSG00000022965;ENSMUSG00000033220;ENSMUSG00000028698;ENSMUSG00000030830;ENSMUSG00000051682;ENSMUSG00000042626;ENSMUSG00000022967;ENSMUSG00000027852;ENSMUSG00000073411;ENSMUSG00000004266;ENSMUSG00000002699	Mus_musculus_newGene_2170;Icam1;Fas;Fcgr4;Itgb2;Vav1;Ifngr2;Rac2;Pik3r3;Itgal;Treml4;Shc1;Ifnar1;Nras;H2-D1;Ptpn6;Lcp2
ko04142	Lysosome	131	0.316942	1.14297	0.197065	0.329882	2602	ENSMUSG00000038600;Mus_musculus_newGene_1096;ENSMUSG00000022500;ENSMUSG00000025351;ENSMUSG00000023030;ENSMUSG00000020604;ENSMUSG00000026177;ENSMUSG00000054702;ENSMUSG00000021190;ENSMUSG00000021477;ENSMUSG00000047126;ENSMUSG00000031367;ENSMUSG00000030560;ENSMUSG00000047547;ENSMUSG00000002103;ENSMUSG00000037049;ENSMUSG00000020198;ENSMUSG00000037260;ENSMUSG00000038023;ENSMUSG00000028581;ENSMUSG00000…	Atp6v0a4;Mus_musculus_newGene_1096;Litaf;Cd63;Slc11a2;Arsg;Slc11a1;Ap1s3;Lgmn;Ctsl;Cltc;Ap1s2;Ctsc;Cltb;Acp2;Smpd1;Ap3d1;Hgsnat;Atp6v0a2;Laptm5;Tmem123;Idua;Ctso;Ap4e1;Gla;Entpd4b;Manba;Scarb2;Ap4b1;Gba;Atp6v0d1;Ctss;Entpd4;M6pr;Sgsh
ko04310	Wnt signaling pathway	127	-0.310782	-1.13906	0.204159	0.3394	2358	ENSMUSG00000024232;ENSMUSG00000026991;ENSMUSG00000029071;ENSMUSG00000032064;ENSMUSG00000027438;ENSMUSG00000000142;ENSMUSG00000008305;ENSMUSG00000019880;ENSMUSG00000041961;ENSMUSG00000029070;ENSMUSG00000023008;ENSMUSG00000028988;ENSMUSG00000045005;ENSMUSG00000031169;ENSMUSG00000020888;ENSMUSG00000054452;ENSMUSG00000043923;ENSMUSG00000040061;ENSMUSG00000018486;ENSMUSG00000000782;ENSMUSG00000049791;…	Bambi;Pkp4;Dvl1;Dixdc1;Napb;Axin2;Tle1;Rspo3;Znrf3;Mxra8;Fmnl3;Ctnnbip1;Fzd5;Porcn;Dvl2;Tle5;Ccdc84;Plcb2;Wnt9b;Tcf7;Fzd4;Rnf43;Ccnd2;Tle6;Serpinf1;Fzd7;Fzd8;Ccnd1;Prickle1;Gm20518;Nkd1;Sox17;Tle2;Sfrp1;Notum
ko04713	Circadian entrainment	44	-0.40034	-1.21407	0.207294	0.342251	1484	ENSMUSG00000040061;ENSMUSG00000033910;ENSMUSG00000022994;ENSMUSG00000042644;ENSMUSG00000027669;ENSMUSG00000028005;ENSMUSG00000020893;ENSMUSG00000022220;ENSMUSG00000032766;ENSMUSG00000022840;ENSMUSG00000055866;ENSMUSG00000028957	Plcb2;Gucy1a1;Adcy6;Itpr3;Gnb4;Gucy1b1;Per1;Adcy4;Gng11;Adcy5;Per2;Per3
ko05010	Alzheimer disease	292	-0.273316	-1.09936	0.211765	0.347255	2855	ENSMUSG00000033938;ENSMUSG00000064360;ENSMUSG00000026202;ENSMUSG00000064354;ENSMUSG00000002948;ENSMUSG00000024099;ENSMUSG00000030884;ENSMUSG00000047604;ENSMUSG00000058076;ENSMUSG00000021577;ENSMUSG00000041881;ENSMUSG00000028914;ENSMUSG00000021764;ENSMUSG00000022433;ENSMUSG00000113902;ENSMUSG00000063882;ENSMUSG00000028161;ENSMUSG00000079941;ENSMUSG00000025428;ENSMUSG00000064345;ENSMUSG00000035885;…	Ndufb7;mt-Nd3;Tuba4a;mt-Co2;Map2k7;Ndufv2;Uqcrc2;Frat2;Sdhc;Sdha;Ndufa7;Casp9;Ndufs4;Csnk1e;Ndufb1;Uqcrh;Ppp3ca;Cox5b-ps;Atp5a1;mt-Nd2;Cox8a;Ndufs3;Cox6b1;Slc25a5;Ndufb2;Ndufa11;Cox5b;Ppid;Ndufab1;Ndufa9;Cox7a2;Cox4i1;Ndufs6;Slc25a4;Sdhd;Dvl1;Ndufa4;Ndufa10;mt-Nd1;Axin2;Cox6a1;Ndufa2;Uqcrq;Sem1;Atp5h;Hsd17b10;Atp5d;Cox7b;Ndufb3;Ulk1;Casp3;Uqcrb;Atp5j;Atp5o;Cox6c;Ndufb9;Ndufs5;Ndufb4;Uqcrc1;Ndufs7…
ko04966	Collecting duct acid secretion	21	0.476807	1.22571	0.219355	0.356917	258	ENSMUSG00000038600;Mus_musculus_newGene_1096	Atp6v0a4;Mus_musculus_newGene_1096
ko04514	Cell adhesion molecules	83	0.345865	1.16802	0.220619	0.356917	1378	ENSMUSG00000026012;ENSMUSG00000030786;ENSMUSG00000037405;ENSMUSG00000027009;ENSMUSG00000026442;ENSMUSG00000017167;ENSMUSG00000047109;ENSMUSG00000061048;ENSMUSG00000026566;ENSMUSG00000000290;ENSMUSG00000047230;ENSMUSG00000016496;ENSMUSG00000022901;ENSMUSG00000070305;ENSMUSG00000022790;ENSMUSG00000027111;ENSMUSG00000003316;ENSMUSG00000027322;ENSMUSG00000030830	Cd28;Itgam;Icam1;Itga4;Nfasc;Cntnap1;Cldn14;Cdh3;Mpzl1;Itgb2;Cldn2;Cd274;Cd86;Mpzl3;Igsf11;Itga6;Glg1;Siglec1;Itgal
ko04911	Insulin secretion	41	-0.39028	-1.16837	0.225141	0.359661	1653	ENSMUSG00000031659;ENSMUSG00000040061;ENSMUSG00000022994;ENSMUSG00000042644;ENSMUSG00000022220;ENSMUSG00000022840;ENSMUSG00000026576;ENSMUSG00000041798;ENSMUSG00000027690	Adcy7;Plcb2;Adcy6;Itpr3;Adcy4;Adcy5;Atp1b1;Gck;Slc2a2
ko04973	Carbohydrate digestion and absorption	27	-0.448254	-1.21705	0.225621	0.359661	1479	ENSMUSG00000024960;ENSMUSG00000032412;ENSMUSG00000034793;ENSMUSG00000025877;ENSMUSG00000015968;ENSMUSG00000031834;ENSMUSG00000028976;ENSMUSG00000032114;ENSMUSG00000040061;ENSMUSG00000078650;ENSMUSG00000026576;ENSMUSG00000027690	Plcb3;Atp1b3;G6pc3;Hk3;Cacna1d;Pik3r2;Slc2a5;Slc37a4;Plcb2;G6pc;Atp1b1;Slc2a2
ko04910	Insulin signaling pathway	123	-0.309406	-1.12409	0.229287	0.359661	1286	ENSMUSG00000072494;ENSMUSG00000022091;ENSMUSG00000078650;ENSMUSG00000005057;ENSMUSG00000020532;ENSMUSG00000055980;ENSMUSG00000021069;ENSMUSG00000048445;ENSMUSG00000041237;ENSMUSG00000030244;ENSMUSG00000025153;Mus_musculus_newGene_1650;ENSMUSG00000041798;ENSMUSG00000020538;ENSMUSG00000050423	Ppp1r3e;Sorbs3;G6pc;Sh2b2;Acaca;Irs1;Pygl;Ccdc57;Pklr;Gys2;Fasn;Mus_musculus_newGene_1650;Gck;Srebf1;Ppp1r3g
ko05214	Glioma	56	0.367758	1.15472	0.229299	0.359661	1774	ENSMUSG00000023067;ENSMUSG00000021453;ENSMUSG00000015312;ENSMUSG00000029999;ENSMUSG00000028698;ENSMUSG00000057897;ENSMUSG00000042626;ENSMUSG00000020122;ENSMUSG00000027852	Cdkn1a;Gadd45g;Gadd45b;Tgfa;Pik3r3;Camk2b;Shc1;Egfr;Nras
ko05205	Proteoglycans in cancer	148	0.302629	1.1144	0.230928	0.359661	1950	ENSMUSG00000023067;ENSMUSG00000015533;ENSMUSG00000027995;ENSMUSG00000025351;ENSMUSG00000017737;ENSMUSG00000024778;ENSMUSG00000026193;ENSMUSG00000004040;ENSMUSG00000021994;ENSMUSG00000020689;ENSMUSG00000022346;ENSMUSG00000032826;ENSMUSG00000019768;ENSMUSG00000052397;ENSMUSG00000021477;ENSMUSG00000024998;ENSMUSG00000030170;ENSMUSG00000034116;ENSMUSG00000021109;ENSMUSG00000030102;ENSMUSG00000017344;…	Cdkn1a;Itga2;Tlr2;Cd63;Mmp9;Fas;Fn1;Stat3;Wnt5a;Itgb3;Myc;Ank2;Esr1;Ezr;Ctsl;Plce1;Wnt5b;Vav1;Hif1a;Itpr1;Vtn;Pik3r3;Smo;Cd44;Camk2b;Cav2;Egfr;Nras;Pdpk1;Ptpn6;Mapk14
ko00051	Fructose and mannose metabolism	31	0.420456	1.17657	0.23176	0.359661	1616	ENSMUSG00000038372;ENSMUSG00000037447;ENSMUSG00000025648;ENSMUSG00000101904;ENSMUSG00000070284;ENSMUSG00000019947;ENSMUSG00000033021;ENSMUSG00000069805;ENSMUSG00000025271;ENSMUSG00000026409;ENSMUSG00000032306	Gmds;Arid5a;Pfkfb4;Gm29427;Gmppb;Arid5b;Gmppa;Fbp1;Pfkfb1;Pfkfb2;Mpi
ko05218	Melanoma	52	0.377084	1.15828	0.232759	0.359661	568	ENSMUSG00000023067;ENSMUSG00000021453;ENSMUSG00000015312;ENSMUSG00000028019	Cdkn1a;Gadd45g;Gadd45b;Pdgfc
ko00240	Pyrimidine metabolism	58	-0.35563	-1.1467	0.235514	0.3616	2447	ENSMUSG00000022615;ENSMUSG00000033427;ENSMUSG00000033308;ENSMUSG00000025747;ENSMUSG00000071547;ENSMUSG00000029780;ENSMUSG00000036813;ENSMUSG00000042462;ENSMUSG00000047394;ENSMUSG00000024177;ENSMUSG00000073435;ENSMUSG00000022304;ENSMUSG00000027203;ENSMUSG00000020407;ENSMUSG00000020649;ENSMUSG00000025574;ENSMUSG00000026839	Tymp;Upb1;Dpyd;Tyms;Nt5dc2;Nt5c3;Entpd8;Dctpp1;Odf3b;Nme4;Nme3;Dpys;Dut;Upp1;Rrm2;Tk1;Upp2
ko04972	Pancreatic secretion	48	0.377588	1.15569	0.239754	0.365781	1912	ENSMUSG00000020431;Mus_musculus_newGene_834;ENSMUSG00000021999;ENSMUSG00000060961;ENSMUSG00000046159;ENSMUSG00000029467;ENSMUSG00000027999;ENSMUSG00000009646;ENSMUSG00000030102;ENSMUSG00000029084;ENSMUSG00000019066;ENSMUSG00000001627;ENSMUSG00000030302;Mus_musculus_newGene_1374;ENSMUSG00000019943	Adcy1;Mus_musculus_newGene_834;Cpb2;Slc4a4;Chrm3;Atp2a2;Pla2g12a;Pla2g12b;Itpr1;Cd38;Rab3d;Ifrd1;Atp2b2;Mus_musculus_newGene_1374;Atp2b1
ko04964	Proximal tubule bicarbonate reclamation	14	-0.508672	-1.20379	0.245583	0.372317	1575	ENSMUSG00000027513;ENSMUSG00000040618;ENSMUSG00000020321;ENSMUSG00000004655;ENSMUSG00000010064;ENSMUSG00000025792;ENSMUSG00000027562;ENSMUSG00000044005;ENSMUSG00000026576	Pck1;Pck2;Mdh1;Aqp1;Slc38a3;Slc25a10;Car2;Gls2;Atp1b1
ko04950	Maturity onset diabetes of the young	13	-0.510305	-1.18679	0.265378	0.399063	1043	ENSMUSG00000041237;ENSMUSG00000041798;ENSMUSG00000027690	Pklr;Gck;Slc2a2
[truncated: 155 more rows]

## Sheet: Table S7
#ID	Symbol	sham1_Count	sham2_Count	Amo1_Count	Amo2_Count	sham1_FPKM	sham2_FPKM	Amo1_FPKM	Amo2_FPKM	FDR	log2FC	regulated
[truncated: 2,963 more rows]

## Sheet: Table S8
ID	Description	setSize	enrichmentScore	NES	pvalue	FDR	rank	core_enrichment	Symbol
[truncated: 314 more rows]
